# Supplementary material for: The catalytic decarboxylative allylation of enol carbonates: the synthesis of enantioenriched 3-allyl-3′-aryl 2-oxindoles and the core structure of azonazine
Source: Royal Society of Chemistry journal article supplement (doi:10.1039/d1ob02048j), 2021-11-30
Supplement: d1ob02048j1.pdf [file d1ob02048j1.pdf]

Supplemental material for:

**Catalytic Decarboxylative Allylation of Enol Carbonates:  
Synthesis of Enantioenriched 3-Allyl-3'-Aryl 2-Oxindoles and  
Core Structure of Azonazine**

K. Naresh Babu,<sup>a</sup> Souvik Pal,<sup>a</sup> Arindam Khatua,<sup>a</sup> Avishek Roy,<sup>a</sup> and Alakesh Bisai\*<sup>a,b</sup>

<sup>a</sup>Department of Chemistry, Indian Institute of Science Education and Research Bhopal,  
Bhopal Bypass Road, Bhopal, MP - 462 066, India.

<sup>b</sup>Department of Chemical Sciences, Indian Institute of Science Education and Research  
Kolkata, Mohanpur, Nadia, WB - 741 246, India.

e-Mail: [alakesh@iiserkol.ac.in](mailto:alakesh@iiserkol.ac.in), [alakeshb@gmail.com](mailto:alakeshb@gmail.com)

**Table of Contents**

|                                                             |            |
|-------------------------------------------------------------|------------|
| Materials and Methods                                       | S2         |
| Synthesis and characterization for compound <b>6a-w</b>     | S3-S28     |
| Synthesis and characterization for compound <b>9a-b</b>     | S28-S30    |
| Synthesis and characterization for compounds <b>5a-v</b>    | S30-S51    |
| Synthesis and characterization of <b>8a &amp; 5m</b>        | S51-S54    |
| Synthesis and characterization for compounds (+)- <b>11</b> | S54-S55    |
| Synthesis and characterization for compounds (+)- <b>3</b>  | S56-S57    |
| Spectral graphics                                           | S58 - S191 |

## Materials and Methods

Unless otherwise stated, reactions were performed in oven-dried glassware fitted with rubber septa under an inert atmosphere and were stirred with Teflon-coated magnetic stirring bars. Liquid reagents and solvents were transferred *via* syringe using standard Schlenk techniques. Tetrahydrofuran (THF) and diethyl ether (Et<sub>2</sub>O) were distilled over sodium/benzophenone ketyl. Dichloromethane (CH<sub>2</sub>Cl<sub>2</sub>), toluene, and benzene were distilled over calcium hydride. All other solvents and reagents were used as received unless otherwise noted. Reaction temperatures above 23 °C refer to oil bath temperature. Thin layer chromatography was performed using silica gel 60 F-254 precoated plates (0.25 mm) and visualized by UV irradiation, anisaldehyde stain and other stains. Silicagel of particle size 100-200 mesh was used for flash chromatography. Melting points were recorded on a digital melting point apparatus and are uncorrected. <sup>1</sup>H and <sup>13</sup>C NMR spectra were recorded 400, 500 MHz spectrometers with <sup>13</sup>C operating frequencies of 100, 125 MHz respectively. Chemical shifts (δ) are reported in ppm relative to the residual solvent (CDCl<sub>3</sub>) signal (δ = 7.26 for <sup>1</sup>H NMR and δ = 77.0 for <sup>13</sup>C NMR). Data for <sup>1</sup>H NMR spectra are reported as follows: chemical shift (multiplicity, coupling constants, and number of hydrogen). Abbreviations are as follows: s (singlet), d (doublet), t (triplet), q (quartet), m (multiplet), br (broad). IR spectra were recorded on a FT-IR system (Spectrum BX) and are reported in frequency of absorption (cm<sup>-1</sup>). Only selected IR absorbencies are reported. High-Resolution Mass Spectrometry (HRMS) and Low-Resolution Mass Spectrometry (LRMS) data were recorded on MicrOTOF-Q-II mass spectrometer using methanol as solvent. Optical rotations were measured on an automatic polarimeter. Enantiomeric excess was determined by chiral HPLC analysis performed on HPLC system with Daicel Chiralpak AD-H, Daicel Chiralpak OD-3, Daicel Chiralpak OZ-3 and Daicel Chiralpak IB column.

General procedure for the synthesis of compounds (**6a** and **6d-f**):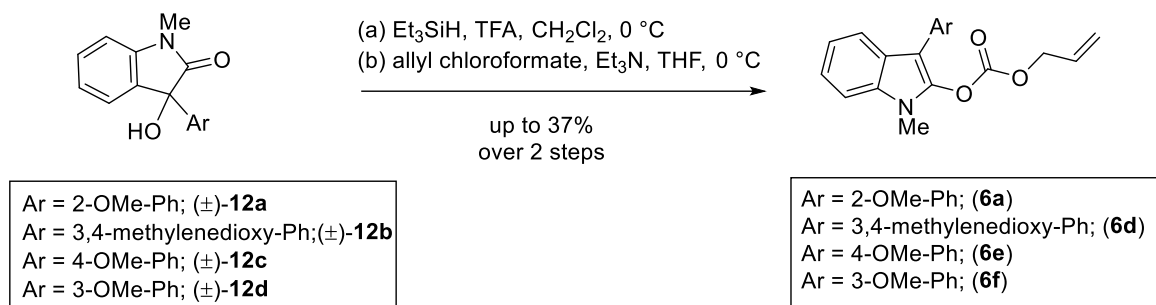

In an oven-dried round-bottom flask was charged with compound ( $\pm$ )-**12** (7.0 mmol, 1.0 equiv.) in dichloromethane (30 mL) under an argon atmosphere at room temperature. To this solution, trifluoroacetic acid (TFA) (42.0 mmol; 6.0 equiv.) was added dropwise at  $0\text{ }^\circ\text{C}$ . After 5 minutes of stirring triethyl silane (35.0 mmol, 5.0 equiv.) was added dropwise over 2 minutes and stirring was continued for 12 h. After completion of the reaction (judged by TLC analysis under UV and  $\text{I}_2$  stain) 5% (w/v) aqueous solution of sodium citrate (5 mL) was added dropwise to the reaction mixture followed by addition of 20 mL of dichloromethane. Then whole mixture was taken in a separatory funnel and the organic layer was separated. The organic layer was dried over anhydrous  $\text{Na}_2\text{SO}_4$  and concentrated under reduced pressure. The crude product was directly charged for the next step.

The crude 3-aryl 2-oxindole (7.0 mmol, 1.0 equiv.) was taken in THF (30 mL) under nitrogen atmosphere at  $0\text{ }^\circ\text{C}$ . Then  $\text{Et}_3\text{N}$  (2.9 mL, 21.0 mmol, 3.0 equiv.) was added to the solution. After 5 minutes of stirring at  $0\text{ }^\circ\text{C}$ , allyl chloroformate (0.9 mL, 8.4 mmol, 1.2 equiv.) was added drop-wise over a period of 2 minutes and stirring was continued. Upon completion of the reaction (judged by TLC under UV light and  $\text{I}_2$  stain), the reaction mixture was diluted with EtOAc (30 mL) and quenched with  $\text{H}_2\text{O}$ . Then the organic layer was separated, dried with anhydrous  $\text{Na}_2\text{SO}_4$  and concentrated under reduced pressure. The crude product was purified by flash chromatography with *n*-Hexane-EtOAc (7:3) to afford product (**6a** and **6d-f**) as yellow gel.

[For synthesis of 3-hydroxy 2-oxindoles ( $\pm$ )-**12a-d** see the reference 18.]

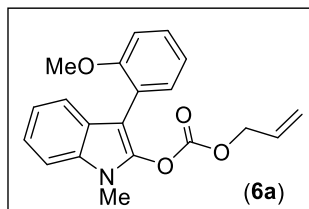

**Allyl (3-(2-methoxyphenyl)-1-methyl-1H-indol-2-yl) carbonate (6a):** The compound **6a** was obtained as orange color gel (7.0 mmol scale of reaction; 0.80 g; 34% over 2 steps).  $R_f = 0.40$  (30% EtOAc in hexane).

**$^1\text{H NMR}$**  (400 MHz,  $\text{CDCl}_3$ )  $\delta$  7.64 (d,  $J = 7.9$  Hz, 1H), 7.53 (dd,  $J = 7.5, 1.9$  Hz, 1H), 7.37 - 7.27 (m, 3H), 7.19 (td,  $J = 7.4, 6.8, 1.4$  Hz, 1H), 7.09 (td,  $J = 7.4, 1.3$  Hz, 1H), 7.04 (d,  $J = 8.3$  Hz, 1H), 5.95 (ddt,  $J = 16.5, 10.6, 5.8$  Hz, 1H), 5.41 (dt,  $J = 17.3, 1.5$  Hz, 1H), 5.34 (dd,  $J = 10.5, 1.5$  Hz, 1H), 4.76 (dd,  $J = 5.7, 1.4$  Hz, 2H), 3.80 (s, 3H), 3.70 (s, 3H).

**$^{13}\text{C NMR}$**  (100 MHz,  $\text{CDCl}_3$ )  $\delta$  157.0, 152.3, 139.2, 132.8, 131.4, 130.8, 128.1, 125.4, 121.8, 121.6, 120.8, 120.2, 120.2, 119.8, 111.3, 109.2, 99.1, 69.8, 55.5, 28.7.

**IR** (film)  $\nu_{\text{max}}$  3736, 3368, 2916, 2540, 1779, 1490, 1421, 1300, 1214, 1104, 921, 710, 620  $\text{cm}^{-1}$ .

**HRMS** (ESI-TOF)  $m/z$ :  $[\text{M} + \text{Na}]^+$  Calcd for  $[\text{C}_{20}\text{H}_{19}\text{NO}_4 + \text{Na}]^+$  360.1206; Found 360.1191.

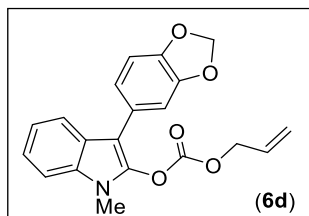

**Allyl (3-(benzo[*d*][1,3]dioxol-5-yl)-1-methyl-1H-indol-2-yl) carbonate (6d):** The compound **6d** was obtained as orange color gel (7.0 mmol scale of reaction, 0.8 g, 33% over 2 steps).  $R_f = 0.41$  (30% EtOAc in hexane).

**<sup>1</sup>H NMR** (400 MHz, CDCl<sub>3</sub>) δ 7.79 (d, *J* = 7.9 Hz, 1H), 7.34 - 7.27 (m, 2H), 7.24 - 7.18 (m, 1H), 7.11 - 7.06 (m, 2H), 6.93 (d, *J* = 8.0 Hz, 1H), 6.00 (s, 2H), 5.94 (ddd, *J* = 16.5, 10.9, 5.4 Hz, 1H), 5.41 (dd, *J* = 17.2, 1.6 Hz, 1H), 5.34 (d, *J* = 10.4 Hz, 1H), 4.74 (d, *J* = 5.7 Hz, 2H), 3.66 (s, 3H).

**<sup>13</sup>C NMR** (100 MHz, CDCl<sub>3</sub>) δ 152.2, 147.9, 146.1, 138.6, 132.5, 130.6, 126.7, 124.8, 122.1, 121.8, 120.5, 120.0, 119.6, 109.3, 109.0, 108.8, 102.9, 101.0, 70.0, 28.4.

**IR** (film)  $\nu_{\max}$  3666, 3328, 2906, 2510, 1769, 1500, 1431, 1320, 1213, 1154, 951, 718, 650 cm<sup>-1</sup>.

**HRMS** (ESI-TOF) *m/z*: [M + Na]<sup>+</sup> Calcd for [C<sub>20</sub>H<sub>17</sub>NO<sub>5</sub> + Na]<sup>+</sup> 374.0999; Found 374.1005.

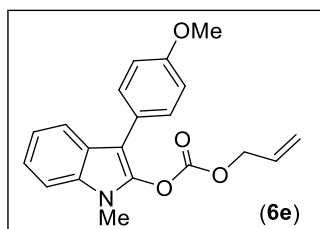

**Allyl (3-(4-methoxyphenyl)-1-methyl-1H-indol-2-yl) carbonate (6e)**: The compound **6e** was obtained as orange color gel (7.0 mmol scale of reaction, 0.70 g, 37% over 2 steps). *R<sub>f</sub>* = 0.43 (30% EtOAc in hexane).

**<sup>1</sup>H NMR** (400 MHz, CDCl<sub>3</sub>) δ 7.92 (d, *J* = 8.1 Hz, 1H), 7.68 - 7.66 (m, 2H), 7.39 - 7.38 (m, 2H), 7.30 (ddd, *J* = 8.1, 4.8, 3.4 Hz, 1H), 7.13 - 7.11 (m, 2H), 5.99 (ddt, *J* = 17.3, 10.5, 5.8 Hz, 1H), 5.46 (dd, *J* = 17.2, 1.5 Hz, 1H), 5.39 (dq, *J* = 10.5, 1.3 Hz, 1H), 4.79 (dt, *J* = 5.8, 1.4 Hz, 2H), 3.91 (s, 3H), 3.71 (s, 3H).

**<sup>13</sup>C NMR** (100 MHz, CDCl<sub>3</sub>) δ 158.3, 152.4, 138.7, 132.7, 130.7, 129.6, 125.5, 125.0, 122.2, 120.6, 119.9, 119.7, 114.4, 109.4, 102.9, 70.0, 55.3, 28.4.

**IR** (film)  $\nu_{\max}$  3621, 3338, 2996, 2520, 1774, 1520, 1421, 1350, 1210, 1104, 901, 710, 610  $\text{cm}^{-1}$ .

**HRMS** (ESI-TOF)  $m/z$ :  $[\text{M} + \text{H}]^+$  Calcd for  $[\text{C}_{20}\text{H}_{20}\text{NO}_4]^+$  338.1387; Found 338.1373.

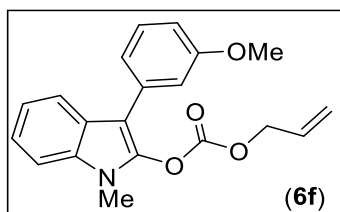

**Allyl (3-(3-methoxyphenyl)-1-methyl-1H-indol-2-yl) carbonate (6f)**: The compound **6f** was obtained as an orange color gel. (7.0 mmol scale of reaction; 0.70 g; 32% over 2 steps).  $R_f = 0.50$  (20% EtOAc in hexane).

**$^1\text{H}$  NMR** (400 MHz,  $\text{CDCl}_3$ )  $\delta$  7.84 (d,  $J = 7.9$  Hz, 1H), 7.38 - 7.24 (m, 3H), 7.22 - 7.17 (m, 3H), 6.85 (dd,  $J = 8.3, 2.5$  Hz, 1H), 5.90 (ddt,  $J = 16.5, 10.4, 5.8$  Hz, 1H), 5.38 (dd,  $J = 17.2, 1.5$  Hz, 1H), 5.31 (dd,  $J = 10.5, 1.3$  Hz, 1H), 4.71 (dt,  $J = 5.8, 1.4$  Hz, 2H), 3.85 (s, 3H), 3.67 (s, 3H).

**$^{13}\text{C}$  NMR** (100 MHz,  $\text{CDCl}_3$ )  $\delta$  159.9, 152.1, 138.9, 134.3, 132.6, 130.5, 129.7, 124.6, 122.2, 120.8, 120.6, 119.9, 119.7, 113.6, 112.1, 109.3, 102.9, 70.0, 55.2, 28.4.

**IR** (film)  $\nu_{\max}$  3574, 3040, 2959, 2372, 1768, 1579, 1484, 1377, 1238, 1076, 904, 788, 521  $\text{cm}^{-1}$ .

**HRMS** (ESI-TOF)  $m/z$ :  $[\text{M} + \text{H}]^+$  Calcd for  $[\text{C}_{20}\text{H}_{20}\text{NO}_4]^+$  338.1387; Found 338.1375.

**General procedure for the synthesis of compounds (6b and 6c):**

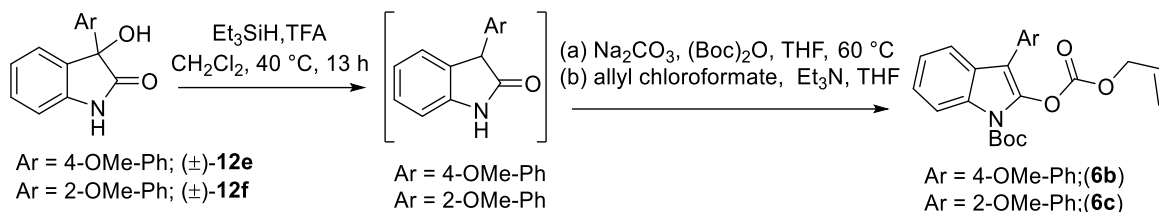

In an oven-dried round-bottom flask was charged with (±)-**12e-f** (7.8 mmol; 1.0 equiv.) in dichloromethane (40 mL) under argon atmosphere at room temperature. To this solution trifluoroacetic acid (TFA) (3.6 mL; 47 mmol; 6.0 equiv) was added dropwise over a period of 2 minutes at 0 °C. Then triethyl silane (6.2 mL; 39.0 mmol; 5.0 equiv.) was added dropwise over a period of 2 minutes and stirring was continued for 13 h at 40 °C. After completion of the reaction (judged by TLC analysis under UV and I<sub>2</sub> stain) 5% (w/v) aqueous solution of sodium citrate (5 mL) was added drop wise to neutralize the mixture. Then the reaction mixture was taken in a separatory funnel and the organic layer was separated. The organic layer was dried over anhydrous Na<sub>2</sub>SO<sub>4</sub> and concentrated under reduced. The crude product was directly charged for the next step.

The crude 3-aryl 2-oxindole (7.8 mmol, 1.0 equiv.) was taken in tetrahydrofuran (40 mL) and Na<sub>2</sub>CO<sub>3</sub> (6.6 g, 62.4 mmol; 8.0 equiv.) was added. Then di-*tert*-butyl pyrocarbonate (Boc-anhydride) (1.8 mL, 8.6 mmol, 1.1 equiv.) solution in THF (3 mL) was slowly added to the reaction mixture at room temperature. The reaction mixture was then placed in a preheated oil bath maintaining 60 °C and the stirring was continued for 24 h. Upon completion of the reaction (judged by TLC under UV light and I<sub>2</sub> stain) reaction mixture was diluted with EtOAc (50 mL) and saturated NH<sub>4</sub>Cl solution (30 mL). The whole reaction mixture was taken in a separatory funnel to separate the organic layer. The aqueous layer was further extracted with EtOAc (30 mL). The combined organic layer was dried over anhydrous Na<sub>2</sub>SO<sub>4</sub> and concentrated under reduced. The crude product was directly charged for the next step.

The crude *N*-Boc protected 2-oxindole (7.8 mmol, 1.0 equiv.) was taken in dry THF (30 mL) under nitrogen atmosphere at 0 °C. Then triethyl amine (2.4 mL, 23.4 mmol, 3.0 equiv.) was added to the solution. After 5 minutes of stirring, allyl chloroformate (1.0

mL, 9.4 mmol, 1.2 equiv.) was added drop-wise over a period of 2 minutes at 0 °C and stirring was continued for 13 h. Upon completion of the reaction (judged by TLC under UV light and I<sub>2</sub> stain), the reaction mixture was diluted with EtOAc (50 mL) and quenched with H<sub>2</sub>O. The whole reaction mixture was taken in a separatory funnel to separate the organic layer. Then the organic layer was separated, dried with Na<sub>2</sub>SO<sub>4</sub> and concentrated under reduced pressure. The crude product was purified by flash chromatography with *n*-Hexane-EtOAc (7:3) to afford **6b-c** as yellow gel.

[For synthesis of 3-hydroxy 2-oxindoles ( $\pm$ )-**12e-f** see the reference 18.]

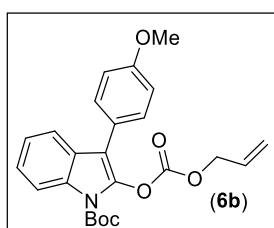

**tert-Butyl 2-(((allyloxy)carbonyl)oxy)-3-(4-methoxyphenyl)-1H-indole-1-carboxylate (6b):** The compound **6b** was obtained as an orange color gel. (7.8 mmol scale of reaction; 1.0 g of product; 30.7%, over three steps).  $R_f = 0.45$  (30% EtOAc in hexane).

**<sup>1</sup>H NMR** (500 MHz, CDCl<sub>3</sub>)  $\delta$  8.18 (d,  $J = 8.3$  Hz, 1H), 7.69 – 7.61 (m, 1H), 7.52 (d,  $J = 8.8$  Hz, 2H), 7.38 (ddd,  $J = 8.4, 7.2, 1.4$  Hz, 1H), 7.33 – 7.29 (m, 1H), 7.04 (d,  $J = 8.7$  Hz, 2H), 5.97 (ddt,  $J = 16.5, 10.5, 5.8$  Hz, 1H), 5.41 (dd,  $J = 17.2, 1.5$  Hz, 1H), 5.33 (dd,  $J = 10.4, 1.4$  Hz, 1H), 4.76 (dt,  $J = 5.8, 1.5$  Hz, 2H), 3.89 (s, 3H), 1.69 (s, 9H).

**<sup>13</sup>C NMR** (125 MHz, CDCl<sub>3</sub>)  $\delta$  159.0, 152.3, 148.9, 136.9, 132.2, 130.7, 130.2, 126.5, 124.6, 123.3, 123.1, 119.5, 115.5, 114.2, 109.8, 84.7, 69.8, 55.3, 28.

**IR** (film)  $\nu_{\max}$  3710, 3338, 2946, 2418, 1764, 1517, 1430, 1317, 1210, 1024, 957, 826, 782, 622 cm<sup>-1</sup>.

**HRMS** (ESI-TOF)  $m/z$ : [M + Na]<sup>+</sup> Calcd for [C<sub>24</sub>H<sub>25</sub>NO<sub>6</sub> + Na]<sup>+</sup> 446.1574; Found 446.1572.



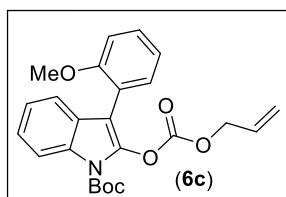

**tert-Butyl 2-(((allyloxy)carbonyl)oxy)-3-(2-methoxyphenyl)-1H-indole-1-carboxylate (6c):** The compound **6c** was obtained as orange color gel (7.8 mmol scale of reaction; 1.0 g of product; 30% over three steps).  $R_f = 0.30$  (10% EtOAc in hexane).

**$^1\text{H NMR}$**  (500 MHz,  $\text{CDCl}_3$ )  $\delta$  8.17 (dd,  $J = 8.4, 0.9$  Hz, 1H), 7.44 – 7.39 (m, 3H), 7.35 (ddd,  $J = 8.5, 7.3, 1.4$  Hz, 1H), 7.28 – 7.24 (m, 1H), 7.09 – 7.04 (m, 2H), 5.98 (ddt,  $J = 17.2, 10.5, 5.8$  Hz, 1H), 5.41 (dd,  $J = 17.2, 1.4$  Hz, 1H), 5.32 (dq,  $J = 10.5, 1.2$  Hz, 1H), 4.77 (dt,  $J = 5.8, 1.4$  Hz, 2H), 3.79 (s, 3H), 1.69 (s, 9H).

**$^{13}\text{C NMR}$**  (125 MHz,  $\text{CDCl}_3$ )  $\delta$  157.5, 152.2, 148.9, 137.6, 132.3, 131.6, 130.8, 129.3, 126.9, 124.3, 123.0, 120.7, 120.2, 119.5, 119.4, 115.5, 111.4, 106.9, 84.5, 69.7, 55.5, 28.2.

**IR** (film)  $\nu_{\text{max}}$  3711, 3328, 2956, 2420, 1776, 1520, 1420, 1310, 1200, 1014, 917, 790, 782, 610  $\text{cm}^{-1}$ .

**HRMS** (ESI-TOF)  $m/z$ :  $[\text{M} + \text{H}]^+$  Calcd for  $[\text{C}_{24}\text{H}_{26}\text{NO}_6]^+$  424.1755; Found 424.1756.

**General synthetic procedure for synthesis of compound (6g-l and 6p-v):**

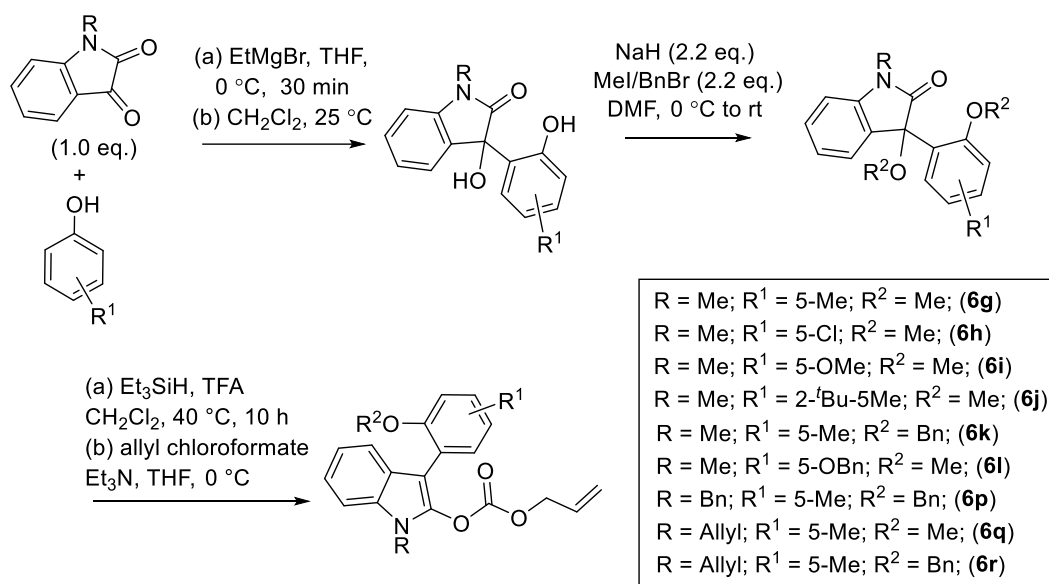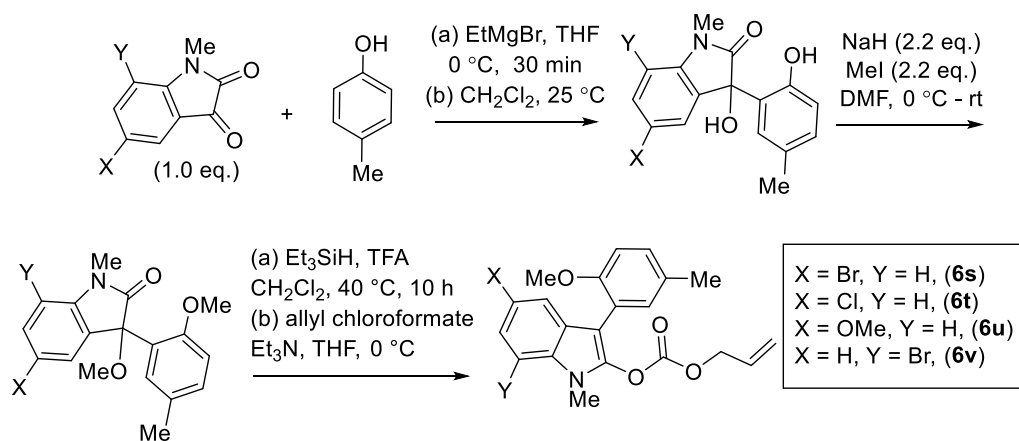

A tetrahydrofuran solution of ethyl magnesium bromide (3 M in THF), (1.2 equiv.) was added dropwise to phenolic derivative (1.0 equiv.) in anhydrous THF (10 mL) at 0 °C. The resultant white suspension was concentrated by rotary evaporation to dryness and anhydrous methylene chloride (15 mL) was added and placed this reaction mixture at 0 °C. Solid *N*-alkyl isatin (12.4 mmol; 1.0 equiv.) was added pinch wise to this reaction mixture over 2 minutes. Then the reaction was stirred at room temperature for 12-16 h (TLC showed complete consumption of starting materials under UV light and I<sub>2</sub> stain). Then the reaction mixture was quenched with 1 N hydrochloric acid (5 mL) at room temperature. Then whole reaction mixture was taken into a separatory funnel and the organic layer was separated and dried with anhydrous Na<sub>2</sub>SO<sub>4</sub>. The crude products were

evaporated to dryness under reduced pressure and utilized for next step without purification.

The crude 3-aryl 3'-hydroxy 2-oxindole (12.4 mmol; 1.0 equiv.) was taken in DMF (20 mL) under argon atmosphere. To this reaction solution, NaH (60% in mineral oil) (2.2 equiv.) was added pinch wise at 0 °C for 2 minutes. After 5 minutes of stirring at the same temperature, MeI/BnBr (2.2 equiv.) was added drop wise to the reaction mixture. After 2 h of stirring (TLC showed complete consumption of the starting material), the reaction mixture was quenched by careful addition of water (5 mL), diluted with EtOAc (50 mL). Then the organic layer was separated, dried over anhydrous Na<sub>2</sub>SO<sub>4</sub> and concentrated under reduced pressure. The crude products were utilized for next step without purification.

The crude hydroxy protected 3-aryl 2-oxindole (12.4 mmol, 1.0 equiv.) was taken in dichloromethane (30 mL) under argon atmosphere. To this reaction solution, trifluoroacetic acid (TFA, 6.0 equiv.) was added dropwise at room temperature. Then triethyl silane (5.0 equiv.) was added dropwise and stirring was continued for 5-8 h. After completion of the reaction (judged by TLC analysis under UV and I<sub>2</sub> stain). 5% (w/v) aqueous solution of sodium citrate (10 mL) was added dropwise to neutralize the mixture followed by addition of 30 mL of dichloromethane. The whole mixture was taken in a separatory funnel and the organic layer was separated. It was dried over anhydrous Na<sub>2</sub>SO<sub>4</sub> and concentrated under reduced pressure to get crude products which were utilized for next step without purification.

The crude 3-aryl 2-oxindole (12.4 mmol, 1.0 equiv.) was taken in THF (30 mL) under argon atmosphere at 0 °C. Triethyl amine (5.0 equiv.) was added to the solution and stirred for 10 minutes. After that allyl chloroformate (1.2 equiv.) was added drop-wise over a period of 5 minutes at 0 °C. After completion of reaction (judged by TLC analysis under UV and I<sub>2</sub> stain), the reaction mixture was diluted with EtOAc (50 mL) and quenched with H<sub>2</sub>O. Then the whole reaction mixture was taken in a separatory funnel to separate the organic layer. The organic layer was dried over anhydrous sodium sulphate

and concentrated under reduced pressure. The crude mixture was purified by column chromatography using EtOAc and hexane mixture as eluent to afford the desired product (**6g-l** and **6p-v**).

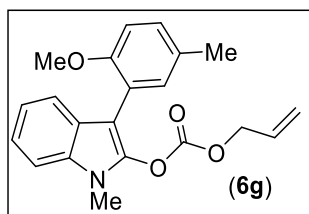

**Allyl (3-(2-methoxy-5-methylphenyl)-1-methyl-1H-indol-2-yl) carbonate (6g):** The compound **6g** was obtained as orange color gel (12.4 mmol, 1.4 g, 32% over four steps).  $R_f = 0.52$  (30% EtOAc in hexane).

**$^1\text{H NMR}$**  (400 MHz,  $\text{CDCl}_3$ )  $\delta$  7.63 (d,  $J = 8.5$  Hz, 1H), 7.33 - 7.25 (m, 3H), 7.19 - 7.12 (m, 2H), 6.92 (d,  $J = 8.3$  Hz, 1H), 5.95 (ddt,  $J = 16.4, 10.7, 5.8$  Hz, 1H), 5.41 (dd,  $J = 17.3, 1.7$  Hz, 1H), 5.33 (dd,  $J = 10.6, 1.4$  Hz, 1H), 4.75 (d,  $J = 5.5$  Hz, 2H), 3.76 (s, 3H), 3.69 (s, 3H), 2.37 (s, 3H).

**$^{13}\text{C NMR}$**  (100 MHz,  $\text{CDCl}_3$ )  $\delta$  155.0, 152.3, 139.2, 132.8, 131.9, 130.8, 129.9, 128.4, 125.4, 121.8, 121.3, 120.2, 120.2, 119.7, 111.4, 109.1, 99.1, 69.7, 55.7, 28.7, 20.6.

**IR** (film)  $\nu_{\text{max}}$  3726, 3428, 2906, 2440, 1770, 1429, 1401, 1360, 1204, 1124, 901, 750, 610  $\text{cm}^{-1}$ .

**HRMS** (ESI-TOF)  $m/z$ :  $[\text{M} + \text{Na}]^+$  Calcd for  $[\text{C}_{21}\text{H}_{21}\text{NO}_4 + \text{Na}]^+$  374.1363; Found 374.1356.

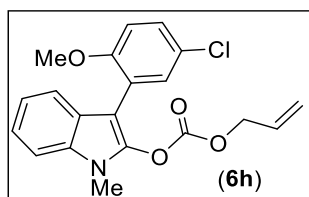

**Allyl (3-(5-chloro-2-methoxyphenyl)-1-methyl-1*H*-indol-2-yl) carbonate (6h):** The compound **6h** was obtained as an orange colored gel. (12.4 mmol, 1.9 g, 41% over four steps).  $R_f = 0.40$  (20% EtOAc in hexane).

**$^1\text{H NMR}$**  (500 MHz,  $\text{CDCl}_3$ )  $\delta$  7.61 (dt,  $J = 8.0, 1.0$  Hz, 1H), 7.48 (d,  $J = 2.7$  Hz, 1H), 7.36 - 7.28 (m, 3H), 7.21 - 7.18 (m, 1H), 6.95 (d,  $J = 8.8$  Hz, 1H), 5.98 (ddt,  $J = 17.2, 10.4, 5.9$  Hz, 1H), 5.44 (dt,  $J = 17.2, 1.4$  Hz, 1H), 5.37 (dq,  $J = 10.4, 1.2$  Hz, 1H), 4.78 (dt,  $J = 5.9, 1.3$  Hz, 2H), 3.79 (s, 3H), 3.71 (s, 3H).

**$^{13}\text{C NMR}$**  (125 MHz,  $\text{CDCl}_3$ )  $\delta$  155.6, 152.1, 139.4, 132.7, 130.8, 130.6, 127.6, 125.6, 125.0, 123.4, 122.0, 120.5, 120.0, 119.9, 112.5, 109.3, 97.9, 69.9, 55.9, 28.7.

**IR** (film)  $\nu_{\text{max}}$  3771, 3408, 2936, 2408, 1771, 1597, 1468, 1327, 1223, 1027, 947, 806, 740, 602  $\text{cm}^{-1}$ .

**HRMS** (ESI-TOF)  $m/z$ :  $[\text{M} + \text{Na}]^+$  Calcd for  $[\text{C}_{20}\text{H}_{18}\text{ClNO}_4 + \text{Na}]^+$  394.0817; Found 394.0825.

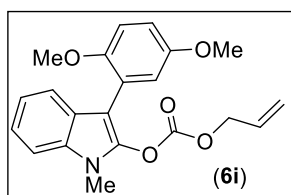

**Allyl (3-(2,5-dimethoxyphenyl)-1-methyl-1*H*-indol-2-yl) carbonate (6i):** The compound **6i** was obtained as an orange color gel. (12.4 mmol scale of reaction, 1.8 g, 39% over four steps).  $R_f = 0.50$  (40% EtOAc in hexane).

**$^1\text{H NMR}$**  (500 MHz,  $\text{CDCl}_3$ )  $\delta$  7.63 (d,  $J = 8.0$  Hz, 1H), 7.32 - 7.24 (m, 2H), 7.1 - 7.13 (m, 1H), 7.07 (d,  $J = 3.1$  Hz, 1H), 6.94 (d,  $J = 8.9$  Hz, 1H), 6.85 (dd,  $J = 8.9, 3.1$  Hz, 1H),

5.94 (ddt,  $J = 16.5, 10.4, 5.8$  Hz, 1H), 5.40 (dq,  $J = 17.3, 1.5$  Hz, 1H), 5.31 (dd,  $J = 10.5, 1.3$  Hz, 1H), 4.74 (dt,  $J = 6.0, 1.4$  Hz, 2H), 3.79 (s, 3H), 3.71 (s, 3H), 3.67 (s, 3H).

$^{13}\text{C}$  NMR (125 MHz,  $\text{CDCl}_3$ )  $\delta$  153.7, 152.2, 151.4, 139.2, 132.8, 130.8, 125.2, 122.6, 121.8, 120.3, 120.1, 119.7, 116.7, 113.0, 112.7, 109.2, 99.0, 69.8, 56.3, 55.8, 28.7.

IR (film)  $\nu_{\text{max}}$  3430, 2835, 2116, 1774, 1846, 1735, 1621, 1477, 1373, 1329, 1225, 1136, 1082, 1047, 944, 842, 780, 741, 642  $\text{cm}^{-1}$ .

HRMS (ESI-TOF)  $m/z$ :  $[\text{M} + \text{Na}]^+$  Calcd for  $[\text{C}_{21}\text{H}_{21}\text{NO}_5 + \text{Na}]^+$  390.1312; Found 390.1324.

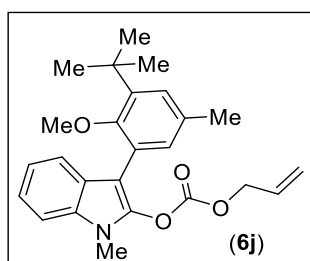

**Allyl (3-(3-(*tert*-butyl)-2-methoxy-5-methylphenyl)-1-methyl-1*H*-indol-2-yl) carbonate (6j):** The compound **6j** was obtained as an orange colored gel. (12.4 mmol scale of reaction; 1.3 g; 26% over four steps).  $R_f = 0.33$  (30% EtOAc in hexane).

$^1\text{H}$  NMR (500 MHz,  $\text{CDCl}_3$ )  $\delta$  7.71 (d,  $J = 7.9$  Hz, 1H), 7.40 – 7.26 (m, 2H), 7.21 (ddd,  $J = 8.3, 7.1, 1.4$  Hz, 1H), 7.16 (dd,  $J = 17.3, 2.3$  Hz, 2H), 5.97 (ddt,  $J = 16.6, 10.4, 5.9$  Hz, 1H), 5.41 (dt,  $J = 17.1, 1.5$  Hz, 1H), 5.37 – 5.23 (m, 1H), 4.74 (d,  $J = 5.9$  Hz, 2H), 3.72 (s, 3H), 3.30 (s, 3H), 2.37 (s, 3H), 1.47 (s, 9H).

$^{13}\text{C}$  NMR (125 MHz,  $\text{CDCl}_3$ )  $\delta$  156.2, 152.2, 142.6, 138.9, 132.9, 132.0, 130.8, 130.4, 126.5, 125.7, 124.8, 121.9, 120.3, 120.2, 119.7, 109.1, 100.7, 69.8, 60.6, 34.9, 30.8, 28.7, 21.2.

**IR** (film)  $\nu_{\max}$  3499, 2908, 2135, 1752, 1620, 1408, 1400, 1301, 1211, 1007, 841, 702, 509  $\text{cm}^{-1}$ .

**HRMS** (ESI-TOF)  $m/z$ :  $[\text{M} + \text{Na}]^+$  Calcd for  $[\text{C}_{25}\text{H}_{29}\text{NO}_4 + \text{Na}]^+$  430.1989; Found 430.1989.

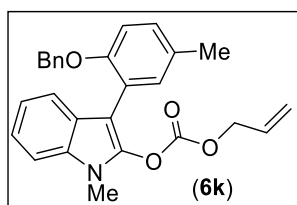

**Allyl (3-(2-(benzyloxy)-5-methylphenyl)-1-methyl-1H-indol-2-yl) carbonate (6k)**: The compound **6k** was obtained as an orange color gel. (12.4 mmol scale of reaction, 3.0 g, 25% over four steps).  $R_f = 0.48$  (30% EtOAc in hexane).

**$^1\text{H}$  NMR** (500 MHz,  $\text{CDCl}_3$ )  $\delta$  7.64 (d,  $J = 1.1$  Hz, 1H), 7.34 – 7.26 (m, 5H), 7.25 – 7.18 (m, 3H), 7.03 (dd,  $J = 8.4, 2.4$  Hz, 1H), 6.88 (d,  $J = 8.4$  Hz, 1H), 5.85 (ddt,  $J = 17.3, 10.4, 5.8$  Hz, 1H), 5.32 (dd,  $J = 17.2, 1.4$  Hz, 1H), 5.26 (dd,  $J = 10.4, 1.3$  Hz, 1H), 5.01 (s, 2H), 4.57 (dt,  $J = 5.8, 1.4$  Hz, 2H), 3.67 (s, 3H), 2.33 (s, 3H).

**$^{13}\text{C}$  NMR** (125 MHz,  $\text{CDCl}_3$ )  $\delta$  154.4, 152.2, 139.2, 137.7, 132.7, 132.1, 130.7, 130.5, 128.4, 128.2, 127.3, 126.9, 125.5, 122.2, 121.7, 120.4, 120.1, 119.6, 114.5, 109.0, 99.5, 71.2, 69.6, 28.6, 20.6.

**IR** (film)  $\nu_{\max}$  3394, 2909, 2118, 1754, 1622, 1408, 1301, 1210, 1083, 911, 702, 509  $\text{cm}^{-1}$ .

**HRMS** (ESI-TOF)  $m/z$ :  $[\text{M} + \text{Na}]^+$  Calcd for  $[\text{C}_{27}\text{H}_{25}\text{NO}_4 + \text{Na}]^+$  450.1676; Found 450.1696.

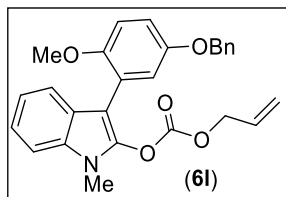

**Allyl (3-(5-(benzyloxy)-2-methoxyphenyl)-1-methyl-1H-indol-2-yl) carbonate (6l):**

The compound **6l** was obtained as an orange color gel. (12.4 mmol scale of reaction, 1.4 g, 25% over four steps).  $R_f = 0.40$  (40% EtOAc in hexane).

**$^1\text{H NMR}$**  (400 MHz,  $\text{CDCl}_3$ )  $\delta$  7.48 - 7.30 (m, 6H), 7.24 (ddd,  $J = 8.1, 6.1, 1.2$  Hz, 1H), 7.13 - 7.08 (m, 2H), 6.92 (d,  $J = 1.7$  Hz, 2H), 5.93 (ddt,  $J = 17.2, 10.4, 5.8$  Hz, 1H), 5.39 (dd,  $J = 17.2, 1.4$  Hz, 1H), 5.31 - 5.28 (m, 1H), 5.05 (s, 2H), 4.73 (dt,  $J = 5.9, 1.4$  Hz, 2H), 3.70 (s, 3H), 3.66 (s, 3H).

**$^{13}\text{C NMR}$**  (100 MHz,  $\text{CDCl}_3$ )  $\delta$  152.8, 152.2, 151.5, 139.2, 137.4, 132.8, 130.7, 128.6, 127.8, 127.5, 125.1, 122.5, 121.8, 120.3, 120.0, 119.7, 117.7, 114.3, 112.7, 109.1, 98.9, 70.6, 69.8, 56.3, 28.7.

**IR** (film)  $\nu_{\text{max}}$  3432, 2110, 1744, 1647, 1498, 1464, 1366, 1225, 1080, 1041, 1029, 946, 740, 698  $\text{cm}^{-1}$ .

**HRMS** (ESI-TOF)  $m/z$ :  $[\text{M} + \text{H}]^+$  Calcd for  $[\text{C}_{27}\text{H}_{26}\text{NO}_5]^+$  444.1805; Found 444.1819.

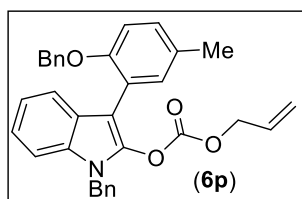

**Allyl (1-benzyl-3-(2-(benzyloxy)-5-methylphenyl)-1H-indol-2-yl) carbonate (6p):** The compound **6p** was obtained as an orange color gel. (12.4 mmol scale of reaction, 1.8 g, 30% over four steps).  $R_f = 0.40$  (40% EtOAc in hexane).



**<sup>1</sup>H NMR** (400 MHz, CDCl<sub>3</sub>) δ 7.68 (d, *J* = 7.7 Hz, 1H), 7.38 (d, *J* = 2.1 Hz, 1H), 7.30 – 7.14 (m, 13H), 7.09 (dd, *J* = 8.3, 2.2 Hz, 1H), 6.95 (d, *J* = 8.3 Hz, 1H), 5.77 (ddt, *J* = 16.5, 11.0, 5.7 Hz, 1H), 5.32 – 5.21 (m, 4H), 5.04 (s, 2H), 4.50 (d, *J* = 5.7 Hz, 2H), 2.37 (s, 3H).

**<sup>13</sup>C NMR** (100 MHz, CDCl<sub>3</sub>) δ 154.4, 151.6, 139.0, 137.6, 136.9, 132.2, 132.1, 130.6, 130.5, 128.7, 128.5, 128.2, 127.4, 127.3, 127.0, 126.7, 125.9, 122.1, 121.8, 120.3, 120.2, 119.4, 114.2, 109.7, 99.9, 71.1, 69.6, 46.1, 20.6.

**IR** (film)  $\nu_{\max}$  3746, 3408, 2900, 2440, 1760, 1420, 1400, 1361, 1214, 1144, 981, 754, 620 cm<sup>-1</sup>.

**HRMS** (ESI-TOF) *m/z*: [M + Na]<sup>+</sup> Calcd for [C<sub>33</sub>H<sub>29</sub>NO<sub>4</sub> + Na]<sup>+</sup> 526.1989; Found 526.1987.

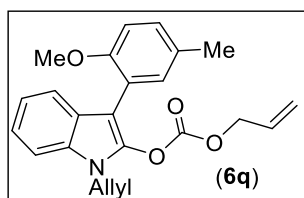

**Allyl (1-allyl-3-(2-methoxy-5-methylphenyl)-1H-indol-2-yl) carbonate (6q)**: The compound (**6q**) was obtained as an orange color gel. (12.4 mmol scale of reaction, 1.3 g, 27% over four steps). *R<sub>f</sub>* = 0.43 (40% EtOAc in hexane).

**<sup>1</sup>H NMR** (500 MHz, CDCl<sub>3</sub>) δ 7.70 - 7.66 (m, 1H), 7.39 - 7.66 (m, 2H), 7.32 - 7.27 (m, 1H), 7.24 - 7.16 (m, 2H), 6.98 - 6.94 (m, 1H), 6.08 - 6.01 (m, 1H), 5.99 - 5.91 (m, 1H), 5.44 - 5.39 (m, 1H), 5.37 - 5.33 (m, 1H), 5.29 - 5.23 (m, 2H), 4.77 - 4.73 (m, 4H), 3.81 - 3.78 (m, 3H), 2.42 - 2.40 (m, 3H).

**$^{13}\text{C}$  NMR** (125 MHz,  $\text{CDCl}_3$ )  $\delta$  155.0, 152.1, 138.8, 132.9, 132.3, 131.9, 130.8, 129.9, 128.5, 125.7, 121.8, 121.3, 120.3, 120.3, 119.6, 117.3, 111.4, 109.7, 99.6, 69.7, 55.7, 45.2, 20.6.

**IR** (film)  $\nu_{\text{max}}$  3434, 2949, 2128, 1774, 1624, 1498, 1464, 1361, 1212, 1087, 941, 742, 559  $\text{cm}^{-1}$ .

**HRMS** (ESI-TOF)  $m/z$ :  $[\text{M} + \text{H}]^+$  Calcd for  $[\text{C}_{23}\text{H}_{24}\text{NO}_4]^+$  378.1700; Found 378.1709.

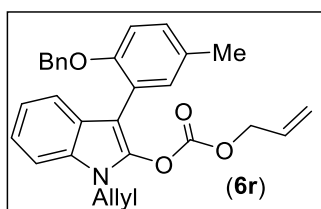

**Allyl (1-allyl-3-(2-(benzyloxy)-5-methylphenyl)-1H-indol-2-yl) carbonate (6r)**: The compound **6r** was obtained as an orange colored gel. (12.4 mmol scale of reaction, 1.5 g, 27% over four steps).  $R_f = 0.42$  (30% EtOAc in hexane).

**$^1\text{H}$  NMR** (500 MHz,  $\text{CDCl}_3$ )  $\delta = 7.63$  (d,  $J = 8.0$ , 1H), 7.32 – 7.26 (m, 4H), 7.22 - 7.21 m, 4H), 7.14 (t,  $J = 7.5$ , 1H), 7.07 – 7.02 (m, 1H), 6.91 (d,  $J = 8.3$ , 1H), 5.97 (ddd,  $J = 16.0$ , 10.5, 5.2, 1H), 5.82 (ddt,  $J = 16.5$ , 10.9, 5.7, 1H), 5.31 – 5.112 (m, 4H), 5.01 (s, 2H), 4.70 (d,  $J = 5.2$ , 2H), 4.56 (d,  $J = 5.8$ , 2H), 2.34 (s, 3H).

**$^{13}\text{C}$  NMR** (125 MHz,  $\text{CDCl}_3$ )  $\delta$  154.4, 151.9, 138.9, 137.7, 132.8, 132.1, 130.7, 130.5, 128.5, 128.2 (2C), 127.3, 126.9, 125.8, 122.2, 121.7, 120.4, 120.2, 119.5, 117.2, 114.4, 109.5, 99.8, 71.2, 69.6, 45.0, 20.6.

**IR** (film)  $\nu_{\text{max}}$  3630, 3049, 2928, 1754, 1644, 1508, 1464, 1361, 1262, 1187, 941, 792, 659  $\text{cm}^{-1}$ .

**HRMS** (ESI-TOF)  $m/z$ :  $[M + Na]^+$  Calcd for  $[C_{29}H_{27}NO_4 + Na]^+$  476.1832; Found 476.1809.

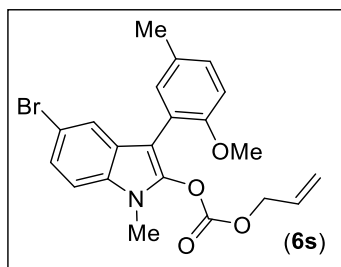

**Allyl (5-bromo-3-(2-methoxy-5-methylphenyl)-1-methyl-1H-indol-2-yl) carbonate (6s)**: The compound **6s** was obtained as yellow liquid (0.58 mmol scale of reaction, 0.221 g, 89% over four steps).  $R_f = 0.65$  (40% EtOAc in hexane).

**$^1H$  NMR** (400 MHz,  $CDCl_3$ )  $\delta = 7.77 - 7.58$  (m, 1H), 7.38 – 7.29 (m, 2H), 7.25 – 7.11 (m, 2H), 6.93 (dd,  $J = 8.4, 1.6$ , 1H), 6.08 – 5.82 (m, 1H), 5.52 – 5.21 (m, 2H), 4.76 (ddt,  $J = 5.7, 4.2, 1.4$ , 2H), 3.77 (s, 3H), 3.69 (d,  $J = 10.7$ , 3H), 2.38 (d,  $J = 2.6$ , 3H).

**$^{13}C$  NMR** (125 MHz,  $CDCl_3$ )  $\delta$  155.0, 152.0, 134.0, 132.0, 130.6, 129.9, 129.5, 128.8, 128.4, 127.0, 121.0, 120.4, 119.8, 119.5, 111.3, 103.7, 99.9, 69.9, 55.7, 53.4, 20.5.

**IR** (film) 2618, 2092, 1782, 1595, 1469, 1326, 1196, 1101, 569  $cm^{-1}$ .

**HRMS** (ESI)  $m/z$   $[M + H]^+$  Calcd for  $[C_{21}H_{20}BrNO_4 + H]^+$  430.0648; Found 430.0659.

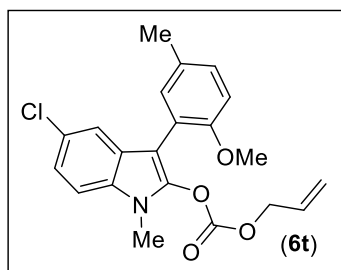

**Allyl (5-chloro-3-(2-methoxy-5-methylphenyl)-1-methyl-1*H*-indol-2-yl) carbonate**

**(6t):** The compound **6t** was obtained as colorless gel (0.58 mmol scale of reaction, 0.116 g, 63% over four steps).  $R_f = 0.55$  (40% EtOAc in hexane).

**$^1\text{H NMR}$**  (500 MHz,  $\text{CDCl}_3$ )  $\delta$  7.76 – 7.53 (m, 1H), 7.35 (dd,  $J = 8.7, 1.9$ , 1H), 7.25 – 7.17 (m, 2H), 7.14 (dd,  $J = 8.3, 2.3$ , 1H), 6.92 (d,  $J = 8.3$ , 1H), 5.95 (ddtd,  $J = 17.2, 10.4, 5.9, 0.9$ , 1H), 5.48 – 5.10 (m, 2H), 4.75 (dt,  $J = 5.9, 1.3$ , 2H), 3.77 (s, 3H), 3.68 (s, 3H), 2.37 (s, 3H).

**$^{13}\text{C NMR}$**  (125 MHz,  $\text{CDCl}_3$ )  $\delta$  154.8, 152.0, 139.9, 131.7, 130.6, 128.7, 129.8, 125.9, 126.3, 124.6, 122.1, 120.5, 119.8, 119.7, 111.3, 110.2, 99.2, 69.9, 55.7, 28.8, 20.6.

**IR** (film) 2526, 1991, 1765, 1428, 1169, 1210, 1053, 952, 542  $\text{cm}^{-1}$ .

**HRMS** (ESI)  $m/z$   $[\text{M} + \text{H}]^+$  Calcd for  $[\text{C}_{21}\text{H}_{20}\text{ClNO}_4 + \text{H}]^+$  386.1154; Found 386.1144.

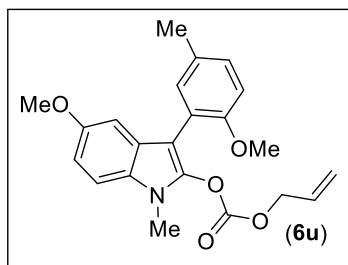**Allyl (5-methoxy-3-(2-methoxy-5-methylphenyl)-1-methyl-1*H*-indol-2-yl) carbonate**

**(6u):** The compound **6u** was obtained as yellowish gel (0.30 mmol scale of reaction, 0.069 g, 61% over four steps).  $R_f = 0.55$  (30% EtOAc in hexane).

**$^1\text{H NMR}$**  (500 MHz,  $\text{CDCl}_3$ )  $\delta$  = 7.31 (d,  $J = 12.9$ , 1H), 7.22 (d,  $J = 8.9$ , 1H), 7.13 (dd,  $J = 8.4, 2.3$ , 1H), 7.09 (d,  $J = 2.5$ , 1H), 6.93 (dd,  $J = 8.5, 1.8$ , 2H), 5.95 (ddt,  $J = 17.4, 10.6, 5.8$ , 1H), 5.47 – 5.25 (m, 2H), 4.75 (dt,  $J = 5.8, 1.4$ , 2H), 3.83 (s, 3H), 3.77 (s, 3H), 3.66 (s, 3H), 2.36 (s, 3H).

**<sup>13</sup>C NMR** (125 MHz, CDCl<sub>3</sub>)  $\delta$  = 154.9, 154.6, 152.2, 139.5, 131.7, 130.7, 129.9, 128.3, 127.9, 125.6, 121.4, 119.7, 111.7, 111.3, 109.9, 102.7, 99.1, 69.7, 68.0, 56.1, 55.6, 25.6, 20.6.

**IR** (film) 2245, 1569, 1499, 1454, 1219, 1056, 1068, 584 cm<sup>-1</sup>.

**HRMS** (ESI)  $m/z$  [M + H]<sup>+</sup> Calcd for [C<sub>22</sub>H<sub>23</sub>NO<sub>5</sub> + H]<sup>+</sup> 382.1649; Found 382.1647.

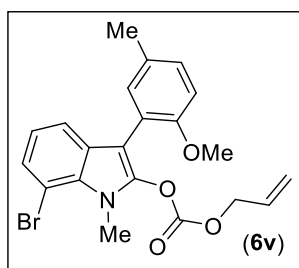

**Allyl (7-bromo-3-(2-methoxy-5-methylphenyl)-1-methyl-1H-indol-2-yl) carbonate (6v):** The compound **6v** was obtained as yellow liquid (0.30 mmol scale of reaction; 0.094 g; 76% over four steps).  $R_f$  = 0.65 (30% EtOAc in hexane).

**<sup>1</sup>H NMR** (400 MHz, CDCl<sub>3</sub>)  $\delta$  = 7.48 (dd,  $J$  = 7.9, 1.1, 1H), 7.38 (dd,  $J$  = 7.7, 1.1, 1H), 7.21 (d,  $J$  = 2.1, 1H), 7.14 (ddd,  $J$  = 8.3, 2.4, 0.8, 1H), 7.00 – 6.89 (m, 2H), 5.94 (ddt,  $J$  = 17.2, 10.5, 5.8, 1H), 5.50 – 5.23 (m, 2H), 4.74 (dt,  $J$  = 5.8, 1.4, 2H), 4.04 (s, 3H), 3.75 (s, 3H), 2.35 (s, 3H).

**<sup>13</sup>C NMR** (125 MHz, CDCl<sub>3</sub>)  $\delta$  155.0, 152.0, 134.0, 132.0, 130.6, 129.9, 129.5, 128.8, 128.4, 127.0, 121.0, 120.4, 119.8, 119.5, 111.3, 103.7, 99.9, 69.9, 55.7, 53.4, 20.5.

**IR** (film) 2622, 2063, 1690, 1411, 1215, 1100, 1023, 514 cm<sup>-1</sup>.

**HRMS** (ESI)  $m/z$  [M + H]<sup>+</sup> Calcd for [C<sub>21</sub>H<sub>20</sub>BrNO<sub>4</sub> + Na]<sup>+</sup> 452.0468; Found 452.0525.

**Synthetic procedure for synthesis of compound (6m):**

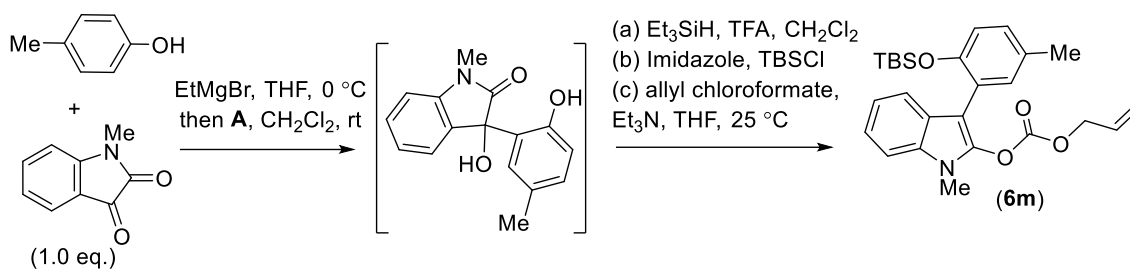

In an oven dried round bottom flask *p*-Cresol (2.0 g; 12.4 mmol; 1.0 equiv.) was taken in anhydrous THF (20 mL) and the reaction vessel was cooled at 0 °C. To this solution, ethyl magnesium bromide (3M in THF) (5.0 mL; 14.9 mmol; 1.2 equiv.) was added dropwise over a period of 2 minutes. The resultant white suspension was concentrated by rotary evaporation to dryness and immediately dissolved in anhydrous methylene chloride (30 mL). To this solution was added solid *N*-methyl isatin (2.0 g; 12.4 mmol; 1.0 equiv.) pinch wise over a period of 2 minutes. The reaction was allowed to warm to room temperature and stirring was continued for 10 h. After completion of the reaction (TLC showed complete consumption of starting materials), 1N hydrochloric acid (5 mL) was added to the reaction mixture and whole mixture was taken in a separatory funnel. Then the organic layer was separated, dried with anhydrous Na<sub>2</sub>SO<sub>4</sub> and evaporated to dryness under reduced pressure. The crude products were utilized for next step without purification.

Crude 3-hydroxy 2-oxindole (12.4 mmol; 1.0 equiv.) was taken in dichloromethane (50 mL) and the reaction mixture was cooled to 0 °C. Trifluoroacetic acid (TFA) (12.6 mL; 74.4 mmol; 6.0 equiv.) was added to the reaction mixture drop-wise over a period of 2 minutes at same temperature. Then triethyl silane (9.9 mL; 62.05 mmol; 5.0 equiv.) was added to the mixture at 0 °C for 2 minutes and stirring was continued for 3 h. After completion of the reaction (judged by TLC analysis under UV and I<sub>2</sub> stain), 5% (w/v) aqueous solution of sodium citrate (10 mL) was added drop wise to neutralize the mixture. Then whole reaction mixture was taken in separatory funnel and the organic layer was separated. It was dried over anhydrous Na<sub>2</sub>SO<sub>4</sub> and concentrated under reduced pressure. The crude products were utilized for next step without purification.

The crude 3-aryl 2-oxindole (12.4 mmol; 1.0 equiv.) was taken in dichloromethane (50 mL) under argon atmosphere at rt. Then imidazole (5.1 gm; 74.4 mmol; 6.0 equiv.) was added to the reaction mixture and stirred for 10 minutes. Then *tert*-butyl dimethyl chlorosilane (TBSCl) (3.7 gm; 24.8 mmol; 2.0 equiv.) was added to the reaction mixture and stirring was continued for 10 h. After completion of the reaction, (judged by TLC analysis under UV and I<sub>2</sub> stain), water (20 mL) was added and whole reaction mixture was taken in a separatory funnel. The organic layer was separated and dried over anhydrous sodium sulphate and concentrated under reduced pressure. The crude products were utilized for next step without purification.

The crude TBS protected product (12.4 mmol; 1.0 equiv. as prepared earlier) was taken in THF (60 mL) under argon atmosphere at 0 °C. Then triethyl amine (8.7 mL; 62.0 mmol; 5.0 equiv.) was added to this solution. After 10 minutes of stirring allyl chloroformate (1.6 mL; 14.9 mmol; 1.2 equiv.) was added drop-wise over a period of 5 minutes at 0 °C. After completion of reaction (judged by TLC analysis under UV and I<sub>2</sub> stain), it was diluted with EtOAc (50 mL) and quenched with H<sub>2</sub>O (30 mL). Then the whole reaction mixture was taken in a separatory funnel to separate the organic layer. The organic layer was dried over anhydrous sodium sulphate and concentrated under reduced pressure. The crude mixture was purified by column chromatography using EtOAc and hexane mixture as eluent to afford the desired product (**6m**).

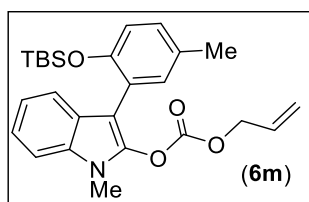

**Allyl (3-(2-((*tert*-butyldimethylsilyloxy)-5-methylphenyl)-1-methyl-1*H*-indol-2-yl) carbonate (6m):** The compound **6m** was obtained as an orange color gel. (12.4 mmol scale of reaction; 2.1 g of product; 38% over four steps);  $R_f = 0.39$  (10% EtOAc in hexane).

**$^1\text{H}$  NMR** (400 MHz,  $\text{CDCl}_3$ )  $\delta$  7.57 (d,  $J = 7.9$  Hz, 1H), 7.30 (d,  $J = 7.7$  Hz, 1H), 7.27 - 7.23 (m, 1H), 7.21 (d,  $J = 2.2$  Hz, 1H), 7.16 - 7.10 (m, 1H), 7.03 (dd,  $J = 8.3, 2.2$  Hz, 1H), 6.85 (d,  $J = 8.3$  Hz, 1H), 5.96 - 5.86 (m, 1H), 5.37 (d,  $J = 17.2$  Hz, 1H), 5.30 (d,  $J = 10.2$  Hz, 1H), 4.70 (d,  $J = 5.7$  Hz, 2H), 3.68 (s, 3H), 2.34 (s, 3H), 0.72 (s, 9H), -0.18 (s, 6H).

**$^{13}\text{C}$  NMR** (100 MHz,  $\text{CDCl}_3$ )  $\delta$  152.0, 151.5, 138.9, 132.4, 131.9, 130.7, 130.4, 128.5, 125.8, 124.1, 121.5, 121.0, 120.2, 119.9, 119.5, 108.6, 100.5, 69.6, 28.4, 25.5, 20.7, 17.9, -4.9.

**IR** (film)  $\nu_{\text{max}}$  3400, 1702, 1600, 1409, 1205, 1070, 814, 617  $\text{cm}^{-1}$ .

**HRMS** (ESI-TOF)  $m/z$ :  $[\text{M} + \text{Na}]^+$  Calcd for  $[\text{C}_{26}\text{H}_{33}\text{NO}_4\text{Si} + \text{Na}]^+$  474.2071; Found 474.2092.

**General procedure for the synthesis of compound (13e-f):**

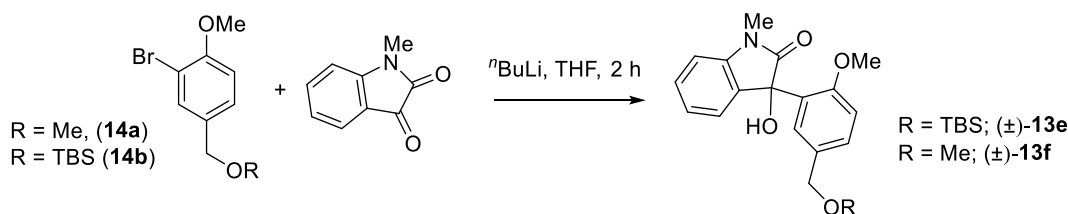

Compound **14a** (15.0 mmol, 1.0 equiv.) was taken in THF (60 mL) and the reaction mixture was cooled to 0 °C. To this solution,  $n\text{BuLi}$  (1.2 equiv.) was added drop wise at 0 °C over a period of 15 min and stirred for another 10 minutes. Then, THF solution (10 mL) of *N*-methyl isatin (1.0 equiv.) was added at 0 °C. The reaction mixture was allowed to warm to room temperature and the stirring was continued for 6 h. After completion of the reaction (monitoring by TLC under UV light and  $\text{I}_2$  stain), it was quenched by slow addition of water (10 mL) and diluted with ethyl acetate (75 mL). The whole reaction mixture was taken in a separatory funnel and washed with brine (60 mL). Then the organic layer was separated, dried with anhydrous  $\text{Na}_2\text{SO}_4$  and concentrated under



reduced pressure. The crude product was purified by flash chromatography with *n*-Hexane-EtOAc (7:3) to afford ( $\pm$ )-**13e-f** as yellow gel.

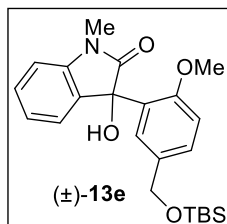

**3-(5-((*tert*-Butyldimethylsilyl)oxy)methyl)-2-methoxyphenyl)-3-hydroxy-1-**

**methylindolin-2-one [( $\pm$ )-**13e**]:** The compound ( $\pm$ )-**13e** was obtained as orange solid (15.0 mmol scale of reaction; 1.98 g of product; 32% over four steps).  $R_f = 0.10$  (30% EtOAc in hexane).

**<sup>1</sup>H NMR** (400 MHz, CDCl<sub>3</sub>)  $\delta$  7.55 (d,  $J = 2.2$  Hz, 1H), 7.30 (td,  $J = 7.8, 1.3$  Hz, 1H), 7.23 (d,  $J = 2.1$  Hz, 1H), 7.13 (dd,  $J = 7.4, 1.3$  Hz, 1H), 7.03 – 6.94 (m, 1H), 6.85 (d,  $J = 7.8$  Hz, 1H), 6.80 (d,  $J = 8.4$  Hz, 1H), 4.69 (s, 2H), 3.62 (s, 3H), 3.25 (s, 3H), 0.91 (s, 9H), 0.08 (s, 3H), -0.01 (s, 3H).

**<sup>13</sup>C NMR** (100 MHz, CDCl<sub>3</sub>)  $\delta$  177.4, 155.5, 144.3, 134.1, 130.6, 129.7, 128.5, 127.3, 124.9, 124.5, 122.9, 111.9, 108.0, 64.7, 56.3, 26.3, 25.9, 18.4, 0.0, -5.2.

**IR** (film)  $\nu_{\max}$  3430, 2925, 2866, 2010, 1716, 1610, 1404, 1269, 1238, 1024, 1001, 937, 857, 710, 619, 501cm<sup>-1</sup>.

**HRMS** (ESI-TOF)  $m/z$ : [M + H]<sup>+</sup> Calcd for [C<sub>23</sub>H<sub>32</sub>NO<sub>4</sub>Si]<sup>+</sup> 414.2095; Found 414.2079.

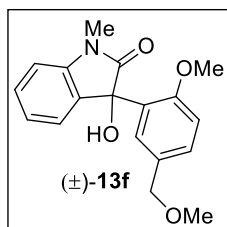

**3-Hydroxy-3-(2-methoxy-5-(methoxymethyl)phenyl)-1-methylindolin-2-one [(±)-13f]**: The compound (±)-**13f** was obtained as orange solid (15.0 mmol scale of reaction; 1.4 g of product; 30% over four steps).  $R_f = 0.50$  (30% EtOAc in hexane).

$^1\text{H NMR}$  (400 MHz,  $\text{CDCl}_3$ )  $\delta$  7.70 (d,  $J = 2.2$  Hz, 1H), 7.30 – 7.22 (m, 2H), 7.09 (d,  $J = 7.3$  Hz, 1H), 6.96 (t,  $J = 7.5$  Hz, 1H), 6.84 (d,  $J = 7.8$  Hz, 1H), 6.77 (d,  $J = 8.3$  Hz, 1H), 4.41 (s, 2H), 3.56 (s, 3H), 3.36 (s, 3H), 3.25 (s, 3H).

$^{13}\text{C NMR}$  (100 MHz,  $\text{CDCl}_3$ )  $\delta$  177.5, 155.7, 144.3, 130.7, 130.6, 129.6, 129.1, 129.0, 126.7, 124.3, 122.9, 111.8, 108.0, 76.3, 74.4, 57.9, 56.2, 26.3.

**IR** (film)  $\nu_{\text{max}}$  3444, 2910, 2846, 2016, 1714, 1614, 1404, 1263, 1228, 1014, 1001, 947, 837, 726, 669,  $521\text{cm}^{-1}$ .

**HRMS** (ESI-TOF)  $m/z$ :  $[\text{M} + \text{H}]^+$  Calcd for  $[\text{C}_{18}\text{H}_{20}\text{NO}_4]^+$  314.1387; Found 314.1401.

### General procedure for the synthesis of compound (6n-o):

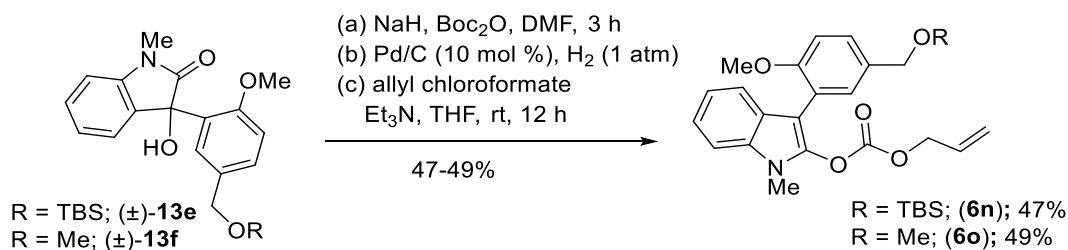

An oven-dried round-bottom flask was charged with (±)-**13e-f** (1.8 mmol; 1.0 equiv) in DMF (40 mL) under nitrogen atmosphere at room temperature. To this solution, NaH (60% dispersion in mineral oil) (1.5 equiv.) was added pinch wise. After 5 minutes of stirring, di-*tert*-butyl dicarbonate (1.5 equiv.) was added drop-wise over a period of 2 minutes. Then the reaction mixture was placed to a preheated oil bath maintaining  $60^\circ\text{C}$  and stirring continued for 3 h. Upon completion of the reaction (judged by TLC under

UV light and I<sub>2</sub> stain), the reaction mixture was quenched with H<sub>2</sub>O (50 mL) and diluted with EtOAc (60 mL). Then the organic layer was separated, dried with anhydrous Na<sub>2</sub>SO<sub>4</sub> and concentrated under reduced pressure. The crude product was directly charged for the next step.

The crude Boc protected compound (1.8 mmol; 1.0 equiv.) was taken in MeOH (10 mL) at room temperature. The solution was degassed by using argon balloon over a period of 10 minutes. Pd on activated charcoal [40 mg, 10% (w/w)] was added to the degassed solution under nitrogen atmosphere. The reaction vessel was purged with hydrogen gas for 10 minutes and stirring was continued for additional 3 h. Upon completion of the reaction (judged by TLC under UV light and I<sub>2</sub> stain), the reaction mixture was filtered through celite and concentrated under rotatory evaporator. The crude product was utilized for next step without purification.

The crude 3-aryl 2-oxindole (1.8 mmol scale; 1.0 equiv. as prepared earlier) was taken in THF (40 mL) under nitrogen atmosphere at 0 °C. Then Et<sub>3</sub>N (0.75 mL; 5.4 mmol; 3.0 equiv.) was added to the solution. After 5 minutes of stirring, allyl chloroformate (0.25 mL; 2.15 mmol; 1.2 equiv.) was added drop-wise over a period of 2 minutes at 0 °C and stirring was continued. Upon completion of the reaction (judged by TLC under UV light and I<sub>2</sub> stain), it was quenched with H<sub>2</sub>O and diluted with EtOAc (40 mL). Then the organic layer was separated, dried with anhydrous Na<sub>2</sub>SO<sub>4</sub> and concentrated under reduced pressure. The crude product was purified by flash chromatography with *n*-Hexane-EtOAc (6:4) to afford (**6n-o**) as yellow gel.

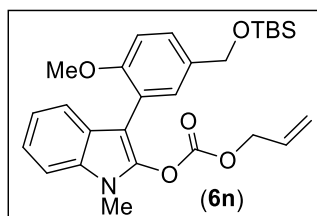

**Allyl (3-(5-(((*tert*-butyldimethylsilyl)oxy)methyl)-2-methoxyphenyl)-1-methyl-1*H*-indol-2-yl) carbonate (6n)**: The compound **6n** was obtained as orange color gel (1.8

mmol scale of reaction; 0.4 g of product; 47% over four steps).  $R_f = 0.50$  (30% EtOAc in hexane).

$^1\text{H NMR}$  (400 MHz,  $\text{CDCl}_3$ )  $\delta$  7.63 (d,  $J = 7.9$  Hz, 1H), 7.46 (d,  $J = 2.1$  Hz, 1H), 7.34 - 7.26 (m, 4H), 7.18 - 7.14 (m, 1H), 7.00 (d,  $J = 8.4$  Hz, 1H), 5.96 (ddt,  $J = 16.5, 11.1, 5.7$  Hz, 1H), 5.42 (dt,  $J = 17.2, 1.5$  Hz, 1H), 5.34 (d,  $J = 10.4$  Hz, 1H), 4.76 (d,  $J = 4.4$  Hz, 4H), 3.79 (s, 3H), 3.70 (s, 3H), 0.98 (d,  $J = 1.5$  Hz, 9H), 0.14 (d,  $J = 1.4$  Hz, 6H).

$^{13}\text{C NMR}$  (100 MHz,  $\text{CDCl}_3$ )  $\delta$  156.0, 152.2, 139.1, 133.6, 132.8, 130.8, 129.5, 126.0, 125.3, 121.7, 121.3, 120.1(2C), 119.7, 111.1, 109.0, 99.0, 69.7, 64.8, 55.7, 28.7, 26.0, - 5.1.

**IR** (film)  $\nu_{\text{max}}$  3434, 2930, 2856, 2116, 1774, 1624, 1464, 1363, 1328, 1226, 1084, 1031, 947, 837, 776, 741, 669,  $561\text{cm}^{-1}$ .

**HRMS** (ESI-TOF)  $m/z$ :  $[\text{M} + \text{Na}]^+$  Calcd for  $[\text{C}_{27}\text{H}_{35}\text{NO}_5\text{Si} + \text{Na}]^+$  504.2177; Found 504.2171.

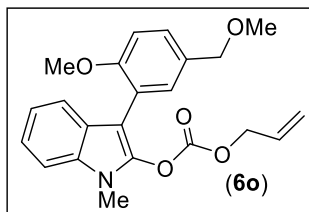

**Allyl (3-(2-methoxy-5-(methoxymethyl)phenyl)-1-methyl-1H-indol-2-yl) carbonate (6o)**: The compound **6o** was obtained as orange color gel (1.8 mmol scale of reaction; 0.34g of product; 49% over four steps).  $R_f = 0.48$  (30% EtOAc in hexane).

$^1\text{H NMR}$  (500 MHz,  $\text{CDCl}_3$ )  $\delta$  7.62 (dt,  $J = 8.0, 1.0$  Hz, 1H), 7.48 (d,  $J = 2.2$  Hz, 1H), 7.36 - 7.28 (m, 3H), 7.18 (ddd,  $J = 8.1, 7.0, 1.2$  Hz, 1H), 7.02 (d,  $J = 8.4$  Hz, 1H), 5.97 (ddt,  $J = 17.3, 10.6, 5.8$  Hz, 1H), 5.43 (dt,  $J = 17.2, 1.4$  Hz, 1H), 5.35 (dt,  $J = 10.5, 1.2$

Hz, 1H), 4.77 (dt,  $J = 5.8, 1.4$  Hz, 2H), 4.48 (s, 2H), 3.81 (s, 3H), 3.71 (s, 3H), 3.42 (s, 3H).

$^{13}\text{C}$  NMR (125 MHz,  $\text{CDCl}_3$ )  $\delta$  156.6, 152.2, 139.2, 132.8, 131.2, 130.7, 130.3, 127.8, 125.3, 121.8, 121.4, 120.2, 120.1, 119.8, 111.3, 109.1, 98.9, 74.4, 69.8, 57.7, 55.7, 28.7.

IR (film)  $\nu_{\text{max}}$  3474, 3050, 2929, 2272, 1777, 1589, 1464, 1367, 1228, 1086, 984, 748, 561  $\text{cm}^{-1}$ .

HRMS (ESI-TOF)  $m/z$ :  $[\text{M} + \text{Na}]^+$  Calcd for  $[\text{C}_{22}\text{H}_{23}\text{NO}_5 + \text{Na}]^+$  404.1468; Found 404.1457.

### Synthesis of compound **6w**:

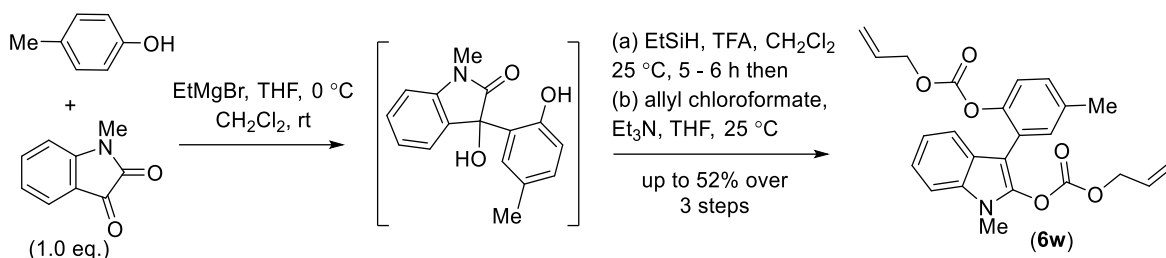

Synthetic procedure for the compound **6w** (5.0 mmol; 52% yield over 3 steps) is similar as synthesis of compound **6e-j**.

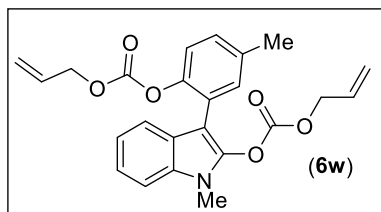

**Allyl (3-(2-(((allyloxy)carbonyloxy)-5-methylphenyl)-1-methyl-1H-indol-2-yl) carbonate (6w)**: The compound **6w** was obtained as orange color gel (5.0 mmol scale of reaction; 0.5g of product; 48% over three steps).  $R_f = 0.38$  (10% EtOAc in hexane).

**<sup>1</sup>H NMR** (400 MHz, CDCl<sub>3</sub>)  $\delta$  = 7.57 (d,  $J$  = 7.9, 1H), 7.34 (s, 1H), 7.31 – 7.20 (m, 2H), 7.15 – 7.12 (m, 3H), 5.92 (ddt,  $J$  = 16.5, 10.4, 5.8, 1H), 5.78 (ddt,  $J$  = 16.5, 11.0, 5.7, 1H), 5.36 (dd,  $J$  = 17.2, 1.6, 1H), 5.31 – 5.25 (m, 1H), 5.19 (dd,  $J$  = 17.2, 1.6, 1H), 5.14 (dd,  $J$  = 10.4, 1.4, 1H), 4.69 (dt,  $J$  = 5.8, 1.4, 2H), 4.54 (dt,  $J$  = 5.7, 1.4, 2H), 3.63 (s, 3H), 2.37 (s, 3H).

**<sup>13</sup>C NMR** (100 MHz, CDCl<sub>3</sub>)  $\delta$  153.5, 151.9, 146.7, 139.2, 135.8, 132.7, 132.1, 131.4, 130.7, 128.7, 125.2, 124.8, 122.3, 122.0, 120.5, 119.8, 119.7, 118.6, 109.1, 98.2, 69.9, 68.8, 28.6, 20.9.

**IR** (film)  $\nu_{\max}$  3432, 2927, 2311, 2210, 1711, 1635, 1459, 1388, 1207, 1093, 1000, 888, 701, 509 cm<sup>-1</sup>.

**HRMS** (ESI-TOF)  $m/z$ : [M + H]<sup>+</sup> Calcd for [C<sub>24</sub>H<sub>24</sub>NO<sub>6</sub>]<sup>+</sup> 422.1598; Found 422.1621.

**General procedure for the synthesis of compounds ( $\pm$ )-**9a-b**:**

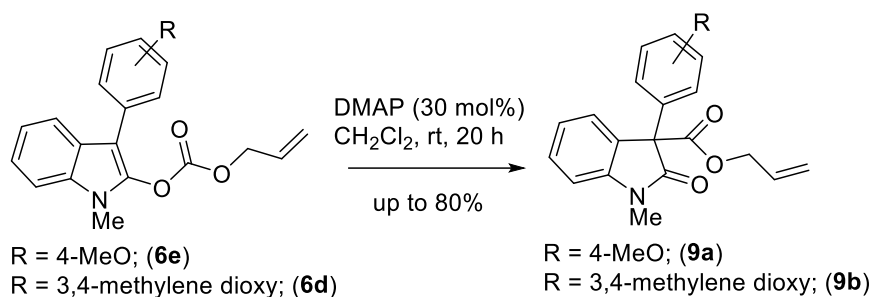

An oven dried round bottom flask was charged with compound **6d-e** (1.5 mmol; 1.0 equiv.) in dichloromethane (15 mL) under nitrogen atmosphere at room temperature. *N,N*-dimethyl amino pyridine (DMAP, 0.3 equiv.) was added to the solution and stirring was continued for 20 h at same temperature. Upon completion of the reaction (judged by TLC analysis), the reaction mixture was evaporated and the crude product was purified

by column chromatography by using EtOAc and hexane as an eluent to afford the desired product ( $\pm$ )-**9a-b**.

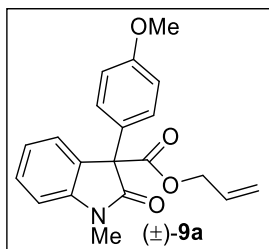

**Allyl 3-(4-methoxyphenyl)-1-methyl-2-oxindoline-3-carboxylate** [( $\pm$ )-**9a**]: The compound ( $\pm$ )-**9a** was obtained as orange color gel (1.5 mmol scale of reaction; 0.4g of product; 80%).  $R_f$  = 0.46 (40% EtOAc in hexane).

**$^1\text{H NMR}$**  (400 MHz,  $\text{CDCl}_3$ )  $\delta$  7.44 (dd,  $J$  = 7.5, 1.2 Hz, 1H), 7.40 (td,  $J$  = 7.7, 1.3 Hz, 1H), 7.26 (dd,  $J$  = 8.8, 2.0 Hz, 2H), 7.15 (td,  $J$  = 7.6, 1.1 Hz, 1H), 6.91 (d,  $J$  = 7.8 Hz, 1H), 6.88 – 6.81 (m, 2H), 5.79 (ddt,  $J$  = 17.2, 10.7, 5.4 Hz, 1H), 5.17 (dt,  $J$  = 12.5, 1.5 Hz, 1H), 5.15 – 5.11 (m, 1H), 4.76 – 4.49 (m, 2H), 3.76 (s, 3H), 3.21 (s, 3H).

**$^{13}\text{C NMR}$**  (100 MHz,  $\text{CDCl}_3$ )  $\delta$  173.1, 169.0, 159.5, 144.4, 131.3, 129.6, 129.1, 127.7, 127.1, 125.9, 122.8, 118.4, 113.9, 108.7, 66.4, 63.3, 55.3, 26.7.

**IR** (film)  $\nu_{\text{max}}$  3932, 2827, 2411, 2440, 1722, 1645, 1559, 1488, 1117, 1003, 990, 808, 700, 505  $\text{cm}^{-1}$ .

**HRMS** (ESI-TOF)  $m/z$ :  $[\text{M} + \text{H}]^+$  Calcd for  $[\text{C}_{20}\text{H}_{20}\text{NO}_4]^+$  338.1387; Found 338.1374.

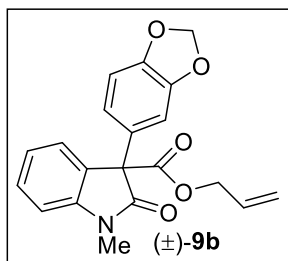

**Allyl 3-(benzo[*d*][1,3]dioxol-5-yl)-1-methyl-2-oxindoline-3-carboxylate [(±)-**9b**]:** The compound (±)-**9b** was obtained as orange color gel (1.5 mmol scale of reaction; 0.5g of product; 48% over three steps).  $R_f = 0.45$  (40% EtOAc in hexane).

**$^1\text{H NMR}$**  (400 MHz,  $\text{CDCl}_3$ )  $\delta$  7.49 – 7.40 (m, 1H), 7.39 (td,  $J = 7.7, 1.2$  Hz, 1H), 7.22 – 7.08 (m, 1H), 6.91 (dd,  $J = 4.9, 3.0$  Hz, 2H), 6.81 – 6.65 (m, 2H), 5.91 (d,  $J = 2.2$  Hz, 2H), 5.79 (ddt,  $J = 17.3, 10.7, 5.5$  Hz, 1H), 5.21 – 5.16 (m, 1H), 5.15 – 5.11 (m, 1H), 4.76 – 4.50 (m, 2H), 3.21 (s, 3H).

**$^{13}\text{C NMR}$**  (100 MHz,  $\text{CDCl}_3$ )  $\delta$  172.8, 168.9, 147.8, 147.7, 144.3, 131.2, 129.7, 129.3, 126.9, 125.9, 122.9, 121.4, 118.5, 108.8, 108.7, 108.0, 101.3, 66.4, 63.5, 26.7.

**IR** (film)  $\nu_{\text{max}}$  3632, 2827, 2351, 2300, 1721, 1644, 1409, 1288, 1117, 1003, 900, 790, 601, 529  $\text{cm}^{-1}$ .

**HRMS** (ESI-TOF)  $m/z$ :  $[\text{M} + \text{Na}]^+$  Calcd for  $[\text{C}_{20}\text{H}_{17}\text{NO}_5 + \text{Na}]^+$  374.0999; Found 374.0997.

**General Synthetic procedure for compound (±)-**5a-r**:**

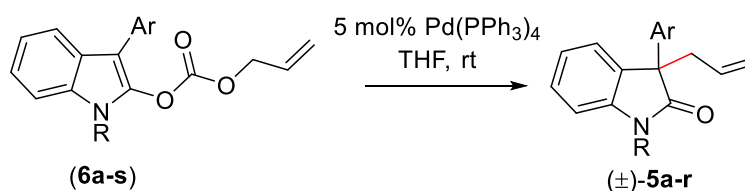

An oven-dried round-bottom flask was charged with carbonate **6a-s** (0.07 mmol; 1.0 equiv) in dry degassed THF (3 mL) at room temperature. Then 5 mol% of  $\text{Pd(PPh}_3)_4$  was added at same temperature and stirring was continued for 15 h. Upon completion of reaction (monitored by TLC), the reaction mixture was concentrated and purified by column chromatography using EtOAc and hexane mixture as eluent to afford the desired product (±)-**5a-r**.

**Optimization of catalytic enantioselective decarboxylative allylations:**



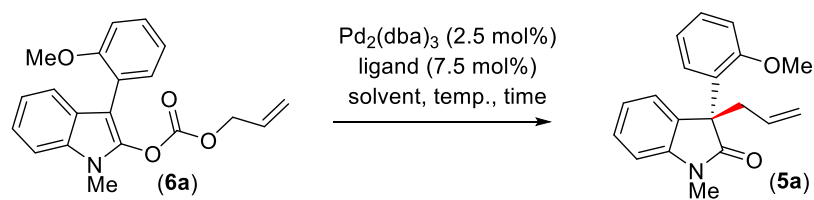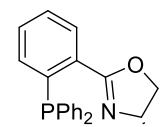

R = *i*Pr, (S)-**L1**  
 R = *i*Bu, (S)-**L2**  
 R = *s*Bu, (S)-**L3**  
 R = *t*Bu, (S)-**L4**

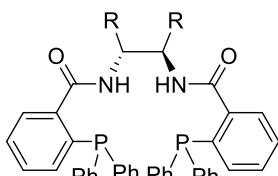

R = Ph, (R,R)-**L5**  
 R =  $-(\text{CH}_2)_4-$ , (R,R)-**L6**

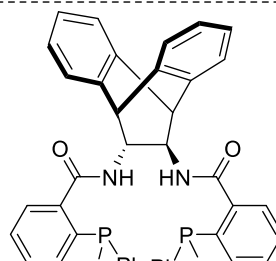

(R,R)-**L7**

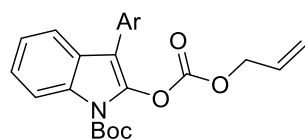

Ar = *p*-OMePh; **(6b)**  
 Ar = *o*-OMePh; **(6c)**

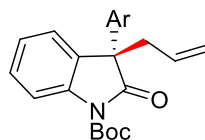

Ar = *p*-OMePh; (S)-**5b**  
 -25 °C, 21 h  
 87%, 35% ee

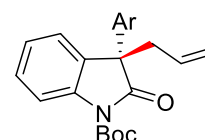

Ar = *o*-OMePh; (R)-**5c**  
 -25 °C, 19 h  
 91%, 42% ee

| entry <sup>a</sup> . | Lig-and               | solvent                           | temp.      | time | % yield <sup>b</sup> | % ee <sup>c</sup> |
|----------------------|-----------------------|-----------------------------------|------------|------|----------------------|-------------------|
| 1                    | <b>L1</b>             | Et <sub>2</sub> O                 | 25 °C      | 13 h | 92%                  | -07               |
| 2                    | <b>L2</b>             | Et <sub>2</sub> O                 | 25 °C      | 12 h | 89%                  | -08               |
| 3                    | <b>L3</b>             | Et <sub>2</sub> O                 | 25 °C      | 14 h | 90%                  | -09               |
| 4                    | <b>L4</b>             | Et <sub>2</sub> O                 | 25 °C      | 14 h | 88%                  | -15               |
| 5                    | <b>L5</b>             | Et <sub>2</sub> O                 | 25 °C      | 13 h | 90%                  | 35                |
| 6                    | <b>L6</b>             | Et <sub>2</sub> O                 | 25 °C      | 12 h | 88%                  | 39                |
| 7                    | <b>L7</b>             | Et <sub>2</sub> O                 | 25 °C      | 12 h | 90%                  | 79%               |
| 8                    | <b>L7</b>             | CH <sub>2</sub> Cl <sub>2</sub>   | 25 °C      | 11 h | 78%                  | 42%               |
| 9                    | <b>L7</b>             | (CH <sub>2</sub> Cl) <sub>2</sub> | 25 °C      | 13 h | 72%                  | 40%               |
| 10                   | <b>L7</b>             | CHCl <sub>3</sub>                 | 25 °C      | 13 h | 75%                  | 46%               |
| 11                   | <b>L7</b>             | Xylene                            | 25 °C      | 14 h | 85%                  | 60%               |
| 12                   | <b>L7</b>             | MTBE                              | 25 °C      | 12 h | 91%                  | 78%               |
| 13                   | <b>L7</b>             | THF                               | 25 °C      | 10 h | 89%                  | 79%               |
| 14                   | <b>L7</b>             | Et <sub>2</sub> O                 | 25 °C      | 12 h | 90%                  | 81%               |
| 15                   | <b>L7<sup>d</sup></b> | Et <sub>2</sub> O                 | 25 °C      | 18 h | 88%                  | 79%               |
| 16                   | <b>L7</b>             | Et <sub>2</sub> O                 | 0 °C to rt | 12 h | 91%                  | 82%               |
| 17                   | <b>L7</b>             | Et <sub>2</sub> O                 | 0 °C       | 13 h | 92%                  | 84%               |
| 18                   | <b>L7</b>             | Et <sub>2</sub> O                 | -10 °C     | 16 h | 91%                  | 85%               |
| 19                   | <b>L7</b>             | Et <sub>2</sub> O                 | -25 °C     | 18 h | 91%                  | 90%               |
| 20                   | <b>L7</b>             | Et <sub>2</sub> O                 | -40 °C     | 30 h | 90%                  | 85%               |
| 21                   | <b>L7</b>             | PhMe                              | -10 °C     | 18 h | 87%                  | 82%               |
| 22                   | <b>L7</b>             | PhMe                              | -25 °C     | 20 h | 84%                  | 87%               |
| 23                   | <b>L7</b>             | PhMe                              | -40 °C     | 36 h | 60%                  | 82%               |

<sup>a</sup>reactions were carried out using 0.06 mmol of **6a-c** in 3.0 mL solvent under argon condition. <sup>b</sup>isolated yields. <sup>c</sup>ee's were determined by using chiral HPLC. <sup>d</sup>reaction was carried out using 1.25 mol% of Pd<sub>2</sub>(dba)<sub>3</sub>.

**General procedure for catalytic enantioselective decarboxylative allylations:**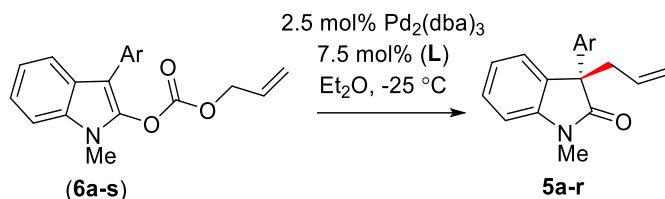

In an oven-dried round-bottom flask, Et<sub>2</sub>O (1.5 mL) was degassed by using nitrogen balloon at room temperature over a period of 10 minutes. To this solution, 0.025 mol% of Pd<sub>2</sub>(dba)<sub>3</sub> and 0.075 mol% of ligand were added and stirring was continued for 20 minutes to make the metal-complex mixture. After that reaction mixture was cooled to the -25 °C. In another vessel, carbonate (**6**) (0.06 mmol; 1.0 equiv) was dissolved in dry degassed (1.5 mL) of Et<sub>2</sub>O. This solution was added drop-wise to metal-complex solution at -25 °C and stirring was continued for specified time. After complete consumption of starting material (monitored by TLC), the reaction mixture was concentrated and purified by column chromatography to afford the desired enantioenriched compound (*R/S*)-**5a-v**.

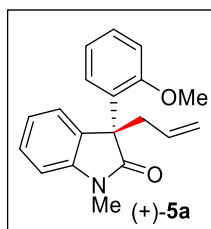

**(*R*)-3-Allyl-3-(2-methoxyphenyl)-1-methylindolin-2-one [(+)-**5a**]:** The compound (+)-**5a** was obtained as orange color gel (0.06 mmol scale of reaction; 16 mg of product; 91%).  $R_f = 0.35$  (30% EtOAc in hexane).

**<sup>1</sup>H NMR** (400 MHz, CDCl<sub>3</sub>)  $\delta$  7.64 (d,  $J = 7.9$  Hz, 1H), 7.53 (dd,  $J = 7.5, 1.9$  Hz, 1H), 7.37 - 7.27 (m, 3H), 7.19 (td,  $J = 7.4, 6.8, 1.4$  Hz, 1H), 7.09 (td,  $J = 7.4, 1.3$  Hz, 1H), 7.04 (d,  $J = 8.3$  Hz, 1H), 5.95 (ddt,  $J = 16.5, 10.6, 5.8$  Hz, 1H), 5.41 (dt,  $J = 17.3, 1.5$  Hz, 1H), 5.34 (dd,  $J = 10.5, 1.5$  Hz, 1H), 4.76 (dd,  $J = 5.7, 1.4$  Hz, 2H), 3.80 (s, 3H), 3.70 (s, 3H).

**$^{13}\text{C}$  NMR** (100 MHz,  $\text{CDCl}_3$ )  $\delta$  157.0, 152.3, 139.2, 132.8, 131.4, 130.8, 128.1, 125.4, 121.8, 121.6, 120.8, 120.2, 120.2, 119.8, 111.3, 109.2, 99.1, 69.8, 55.5, 28.7.

**IR** (film)  $\nu_{\text{max}}$  3042, 2946, 2845, 1713, 1620, 1449, 1312, 1290, 1230, 1220, 792, 583  $\text{cm}^{-1}$ .

**HRMS** (ESI-TOF)  $m/z$ :  $[\text{M} + \text{Na}]^+$  Calcd for  $[\text{C}_{19}\text{H}_{19}\text{NO}_2 + \text{Na}]^+$  316.1308; Found 316.1287.

Enantiomeric excess of pure compound was determined *via* HPLC analysis using a Chiralpak IB column; solvent: hexane/2-propanol = 90/10; flow rate: 1.0 mL/min; detection: at 254 nm):  $t_{\text{R}}$  major = 12.45 min.  $t_{\text{R}}$  minor = 17.38 min,  $[\alpha]_{\text{D}}^{25.0} = +60.5$  ( $c = 0.26$ ,  $\text{CH}_2\text{Cl}_2$  for 90% ee).

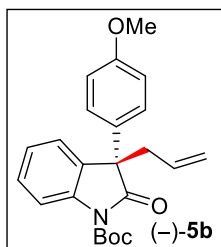

***tert*-Butyl (*S*)-3-allyl-3-(4-methoxyphenyl)-2-oxoindoline-1-carboxylate [(-)-5a]:** The compound (-)-5b was obtained as orange color gel (0.06 mmol scale of reaction; 20 mg of product; 87%).  $R_f = 0.40$  (10% EtOAc in hexane).

**$^1\text{H}$  NMR** (400 MHz,  $\text{CDCl}_3$ )  $\delta$  7.31 (td,  $J = 7.7, 1.3$  Hz, 1H), 7.24 - 7.22 (m, 1H), 7.09 (td,  $J = 7.5, 1.0$  Hz, 1H), 6.90 (d,  $J = 1.9$  Hz, 1H), 6.87 (d,  $J = 7.8$  Hz, 1H), 6.79 (dd,  $J = 8.2, 1.9$  Hz, 1H), 6.70 (d,  $J = 8.2$  Hz, 1H), 5.89 (q,  $J = 1.5$  Hz, 2H), 5.37 (ddt,  $J = 17.1, 10.0, 7.1$  Hz, 1H), 5.00 (dq,  $J = 17.0, 1.5$  Hz, 1H), 4.92 - 4.89 (m, 1H), 3.18 (s, 3H), 3.00 - 2.90 (m, 2H).

**$^{13}\text{C}$  NMR** (100 MHz,  $\text{CDCl}_3$ )  $\delta$  178.0, 147.9, 146.8, 143.7, 133.3, 132.4, 131.7, 128.3, 125.1, 122.5, 120.4, 119.2, 108.2, 108.0, 107.9, 101.1, 56.0, 42.0.

**IR** (film)  $\nu_{\max}$  3442, 2937, 2301, 2211, 1721, 1623, 1449, 1358, 1267, 1033, 1040, 816, 701, 589  $\text{cm}^{-1}$ .

**HRMS** (ESI-TOF)  $m/z$   $[M + H]^+$  Calcd for  $[\text{C}_{23}\text{H}_{26}\text{NO}_4]^+$  380.1856; Found 380.1844.

Enantiomeric excess of pure compound was determined *via* HPLC analysis using a Chiralpak IC-3 column; solvent: hexane/2-propanol = 80/20; flow rate: 1.0 mL/min; detection: at 254 nm):  $t_R$  major = 4.99 min.  $t_R$  minor = 6.49 min,  $[\alpha]_D^{23.1} = -7.1$  ( $c = 0.31$ ,  $\text{CH}_2\text{Cl}_2$  for 35% ee).

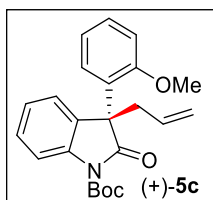

***tert*-Butyl (*R*)-3-allyl-3-(2-methoxyphenyl)-2-oxoindoline-1-carboxylate [(+)-5c]**: The compound (+)-5c was obtained as orange color gel (0.06 mmol scale of reaction; 21 mg of product; 91%).  $R_f = 0.45$  (10% EtOAc in hexane).

**$^1\text{H}$  NMR** (400 MHz  $\text{CDCl}_3$ )  $\delta$  7.81 (d,  $J = 8.1$  Hz, 1H), 7.55 (dd,  $J = 7.7, 1.6$  Hz, 1H), 7.23 (qd,  $J = 8.1, 1.5$  Hz, 2H), 7.02 (tdd,  $J = 7.5, 4.4, 1.1$  Hz, 2H), 6.83 (dd,  $J = 7.5, 1.4$  Hz, 1H), 6.75 (dd,  $J = 8.1, 1.2$  Hz, 1H), 5.40 (ddt,  $J = 17.2, 10.1, 7.1$  Hz, 1H), 5.04 - 4.99 (m, 1H), 4.95 (dd,  $J = 10.2, 1.9$  Hz, 1H), 3.43 (s, 3H), 3.04 - 2.97 (m, 2H), 1.65 (s, 9H).

**$^{13}\text{C}$  NMR** (100 MHz,  $\text{CDCl}_3$ )  $\delta$  177.5, 156.8, 149.7, 140.2, 132.1, 131.0, 129.9, 128.9, 127.6, 127.1, 124.1, 122.6, 120.9, 119.9, 114.3, 112.3, 83.6, 55.7, 54.1, 41.5, 28.2.

**IR** (film)  $\nu_{\max}$  3332, 2857, 2321, 2191, 1720, 1643, 1429, 1308, 1247, 1103, 1000, 810, 721, 689  $\text{cm}^{-1}$ .

**HRMS** (ESI-TOF)  $m/z$ :  $[M + H]^+$  Calcd for  $[C_{23}H_{26}NO_4]^+$  380.1856; Found 380.1858.

Enantiomeric excess of pure compound was determined *via* HPLC analysis using a Chiralpak AD-H column; solvent: hexane/2-propanol = 97/3; flow rate: 1.0 mL/min; detection: at 254 nm):  $t_R$  minor = 11.55 min,  $t_R$  major = 14.89 min.  $[\alpha]_D^{23.1} = +31.9$  ( $c = 0.12$ ,  $CH_2Cl_2$  for 42% ee).

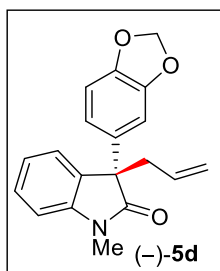

**(S)-3-Allyl-3-(benzo[*d*][1,3]dioxol-5-yl)-1-methylindolin-2-one** **[(-)-5d]**: The compound **(-)-5d** was obtained as orange color gel (0.06 mmol scale of reaction; 16 mg of product; 89%).  $R_f = 0.30$  (30% EtOAc in hexane).

**$^1H$  NMR** (500 MHz,  $CDCl_3$ )  $\delta$  7.35 (td,  $J = 7.7, 1.3$  Hz, 1H), 7.27 (dd,  $J = 7.5, 1.2$  Hz, 1H), 7.14 (td,  $J = 7.5, 1.0$  Hz, 1H), 6.94 (d,  $J = 2.0$  Hz, 1H), 6.93 - 6.89 (m, 1H), 6.83 (dd,  $J = 8.2, 1.9$  Hz, 1H), 6.74 (d,  $J = 8.2$  Hz, 1H), 5.94 - 5.92 (m, 2H), 5.41 (dddd,  $J = 16.9, 10.2, 7.6, 6.7$  Hz, 1H), 5.05 (dq,  $J = 17.1, 1.4$  Hz, 1H), 4.94 (ddt,  $J = 10.0, 1.8, 0.9$  Hz, 1H), 3.22 (s, 3H), 3.22 - 2.94 (m, 2H).

**$^{13}C$  NMR** (125 MHz,  $CDCl_3$ )  $\delta$  178.0, 147.9, 146.8, 143.7, 133.3, 132.4, 131.7, 128.3, 125.1, 122.5, 120.4, 119.2, 108.2, 108.0, 107.9, 101.1, 56.0, 42.1, 26.3.

**IR** (film)  $\nu_{max}$  3042, 2936, 2815, 1717, 1610, 1489, 1372, 1287, 1220, 1010, 742, 513  $cm^{-1}$ .

**HRMS** (ESI-TOF)  $m/z$ :  $[M + Na]^+$  Calcd for  $[C_{19}H_{17}NO_3 + Na]^+$  330.1101; Found 330.1087.

Enantiomeric excess of pure compound was determined *via* HPLC analysis using a Chiralpak AS-3 column; solvent: hexane/2-propanol = 60/40; flow rate: 1.0 mL/min; detection: at 254 nm):  $t_R$  minor = 5.03 min,  $t_R$  major = 5.87 min.  $[\alpha]_D^{25.0} = -83.5$  ( $c = 0.26$ ,  $\text{CH}_2\text{Cl}_2$  for 90% ee).

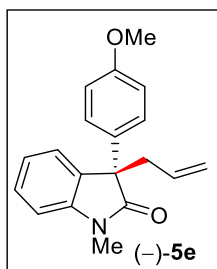

**(*S*)-3-Allyl-3-(4-methoxyphenyl)-1-methylindolin-2-one [(-)-**5e**]:** The compound (-)-**5e** was obtained as orange color gel (0.06 mmol scale of reaction; 15 mg of product; 87%;  $R_f = 0.30$  (30% EtOAc in hexane)).

**$^1\text{H NMR}$**  (400 MHz,  $\text{CDCl}_3$ )  $\delta$  7.34 -7.24 (m, 4H), 7.10 (td,  $J = 7.5, 1.1$  Hz, 1H), 6.88 (d,  $J = 7.8$  Hz, 1H), 6.85 - 6.81 (m, 2H), 5.40 (ddt,  $J = 17.1, 10.1, 7.1$  Hz, 1H), 5.02 (dq,  $J = 17.0, 1.5$  Hz, 1H), 4.91 (dd,  $J = 10.2, 1.9$  Hz, 1H), 3.75 (s, 3H), 3.18 (s, 3H), 2.99 (d,  $J = 7.0$  Hz, 2H).

**$^{13}\text{C NMR}$**  (100 MHz,  $\text{CDCl}_3$ )  $\delta$  178.25, 158.82, 143.84, 132.56, 131.84, 131.55, 128.2 (two different chemical shift carbons), 125.15, 122.44, 119.08, 113.92, 108.22, 55.75, 55.25, 42.14, 26.33.

**IR** (film)  $\nu_{\text{max}}$  3042, 2936, 2815, 1717, 1610, 1489, 1372, 1287, 1220, 1010, 742, 513  $\text{cm}^{-1}$ .

**HRMS** (ESI-TOF)  $m/z$ :  $[\text{M} + \text{Na}]^+$  Calcd for  $[\text{C}_{19}\text{H}_{19}\text{NO}_2 + \text{Na}]^+$  316.1308; Found 316.1304.

Enantiomeric excess of pure compound was determined *via* HPLC analysis using a Chiralpak AS-3 column; solvent: hexane/2-propanol = 90/10; flow rate: 1.0 mL/min; detection: at 254 nm):  $t_R$  major = 5.80 min, minor  $t_R$  = 7.93 min.  $[\alpha]_D^{24.5} = -75.9$  ( $c = 0.18$ ,  $\text{CH}_2\text{Cl}_2$  for 90% ee).

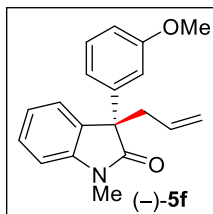

**(S)-3-Allyl-3-(3-methoxyphenyl)-1-methylindolin-2-one [(-)-5f]:** The compound (-)-5f was obtained as orange color gel (0.06 mmol scale of reaction; 18 mg of product; 96%).  $R_f = 0.40$  (50% EtOAc in hexane).

**$^1\text{H NMR}$**  (500 MHz,  $\text{CDCl}_3$ )  $\delta$  7.35 (td,  $J = 7.7, 1.2$  Hz, 1H), 7.30 - 7.23 (m, 1H), 7.25 (t,  $J = 8.0$  Hz, 1H), 7.13 (td,  $J = 7.6, 1.1$  Hz, 1H), 7.01 - 6.98 (m, 2H), 6.91 (dt,  $J = 7.8, 0.8$  Hz, 1H), 6.82 (ddd,  $J = 8.2, 2.6, 0.9$  Hz, 1H), 5.46 - 5.38 (m, 1H), 5.06 (dq,  $J = 17.1, 1.5$  Hz, 1H), 4.95 (ddt,  $J = 10.1, 1.9, 1.0$  Hz, 1H), 3.79 (s, 3H), 3.23 (s, 3H), 3.05 - 3.03 (m, 2H).

**$^{13}\text{C NMR}$**  (125 MHz,  $\text{CDCl}_3$ )  $\delta$  177.8, 159.6, 143.8, 141.1, 132.4, 131.6, 129.4, 128.2, 125.2, 122.3, 119.5, 119.1, 113.5, 112.2, 108.2, 56.3, 55.2, 41.9, 26.4.

**IR** (film)  $\nu_{\text{max}}$  3022, 2926, 2901, 1720, 1610, 1450, 1311, 1217, 1140, 1020, 722, 563  $\text{cm}^{-1}$ .

**HRMS** (ESI-TOF)  $m/z$ :  $[\text{M} + \text{H}]^+$  Calcd for  $[\text{C}_{19}\text{H}_{20}\text{NO}_2]^+$  294.1489; Found 294.1492.

Enantiomeric excess of pure compound was determined *via* HPLC analysis using a Chiralpak AD-H column; solvent: hexane/2-propanol = 70/30; flow rate: 1.0 mL/min;



detection: at 254 nm):  $t_R$  minor = 4.57 min,  $t_R$  major = 5.33 min.  $[\alpha]_D^{24.5} = -71.5$  ( $c = 0.16$ ,  $\text{CH}_2\text{Cl}_2$  for 84% ee).

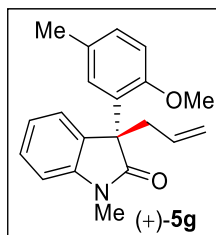

**(R)-3-Allyl-3-(2-methoxy-5-methylphenyl)-1-methylindolin-2-one** [(+)-5g]: The compound (+)-5g was obtained as orange color gel (0.06 mmol scale of reaction; 18 mg of product; 96%).  $R_f = 0.47$  (30% EtOAc in hexane).

**$^1\text{H}$  NMR** (500 MHz,  $\text{CDCl}_3$ )  $\delta$  7.62 (dt,  $J = 8.0, 1.0$  Hz, 1H), 7.48 (d,  $J = 2.2$  Hz, 1H), 7.36 - 7.28 (m, 3H), 7.18 (ddd,  $J = 8.1, 7.0, 1.2$  Hz, 1H), 7.02 (d,  $J = 8.4$  Hz, 1H), 5.97 (ddt,  $J = 17.3, 10.6, 5.8$  Hz, 1H), 5.43 (dt,  $J = 17.2, 1.4$  Hz, 1H), 5.35 (dt,  $J = 10.5, 1.2$  Hz, 1H), 4.77 (dt,  $J = 5.8, 1.4$  Hz, 2H), 4.48 (s, 2H), 3.81 (s, 3H), 3.71 (s, 3H), 3.42 (s, 3H).

**$^{13}\text{C}$  NMR** (125 MHz,  $\text{CDCl}_3$ )  $\delta$  156.6, 152.2, 139.2, 132.8, 131.2, 130.7, 130.3, 127.8, 125.3, 121.8, 121.4, 120.2, 120.1, 119.8, 111.3, 109.1, 98.9, 74.4, 69.8, 57.7, 55.7, 28.7.

**IR** (film)  $\nu_{\text{max}}$  3052, 2926, 2855, 1719, 1611, 1499, 1347, 1257, 1140, 1020, 752, 543  $\text{cm}^{-1}$ .

**HRMS** ESI-TOF)  $m/z$ :  $[\text{M} + \text{H}]^+$  Calcd for  $[\text{C}_{20}\text{H}_{22}\text{NO}_2]^+$  308.1645; Found 308.1651.

Enantiomeric excess of pure compound was determined *via* HPLC analysis using a Chiralpak AD-H column; solvent: hexane/2-propanol = 70/30; flow rate: 1.0 mL/min; detection: at 254 nm):  $t_R$  minor = 4.20 min,  $t_R$  major = 8.19 min.  $[\alpha]_D^{24.0} = +85.5$  ( $c = 0.19$ ,  $\text{CH}_2\text{Cl}_2$  for 91% ee).

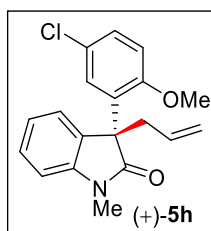

**(R)-3-Allyl-3-(5-chloro-2-methoxyphenyl)-1-methylindolin-2-one [(+)-5h]:** The compound (+)-**5h** was obtained as orange color gel (0.06 mmol scale of reaction; 18 mg of product; 94%).  $R_f = 0.23$  (20% EtOAc in hexane).

**$^1\text{H NMR}$**  (400 MHz,  $\text{CDCl}_3$ )  $\delta$  7.52 (d,  $J = 2.6$  Hz, 1H), 7.24 - 7.18 (m, 2H), 6.95 (td,  $J = 7.5, 1.0$  Hz, 1H), 6.86 (dd,  $J = 7.4, 1.3$  Hz, 1H), 6.81 (d,  $J = 7.7$  Hz, 1H), 6.66 (d,  $J = 8.7$  Hz, 1H), 5.30 (ddt,  $J = 17.1, 10.1, 7.1$  Hz, 1H), 5.02 - 4.97 (m, 1H), 4.89 (dd,  $J = 10.2, 2.0$  Hz, 1H), 3.38 (s, 3H), 3.24 (s, 3H), 2.95 - 2.93 (m, 2H).

**$^{13}\text{C NMR}$**  (100 MHz,  $\text{CDCl}_3$ )  $\delta$  178.5, 155.8, 144.4, 132.5, 131.4, 131.1, 128.3, 127.9, 127.7, 125.9, 122.5, 122.3, 119.4, 113.4, 107.2, 56.2, 53.6, 40.5, 26.2.

**IR** (film)  $\nu_{\text{max}}$  3420, 2898, 2827, 2114, 1721, 1642, 1404, 1367, 1320, 1222, 1107, 1092, 1009, 956, 788, 690, 640  $\text{cm}^{-1}$ .

**HRMS** (ESI-TOF)  $m/z$ :  $[\text{M} + \text{H}]^+$  Calcd for  $[\text{C}_{19}\text{H}_{19}\text{ClNO}_2]^+$  328.1099; Found 328.1108.

Enantiomeric excess of pure compound was determined *via* HPLC analysis using a Chiralpak AD-H column; solvent: hexane/2-propanol = 70/30; flow rate: 1.0 mL/min; detection: at 254 nm):  $t_R$  minor = 4.49 min,  $t_R$  major = 9.19 min.  $[\alpha]_{\text{D}}^{23.7} = +98.5$  ( $c = 0.13$ ,  $\text{CH}_2\text{Cl}_2$  for 92% ee).

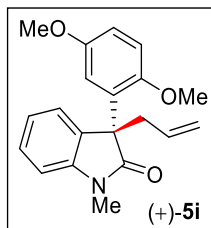

**(R)-3-Allyl-3-(2,5-dimethoxyphenyl)-1-methylindolin-2-one [(+)-5i]:** The compound (+)-**5i** was obtained as orange color gel (0.06 mmol scale of reaction; 18 mg of product; 92%).  $R_f = 0.20$  (30% EtOAc in hexane).

**$^1\text{H NMR}$**  (400 MHz,  $\text{CDCl}_3$ )  $\delta$  7.21 (td,  $J = 7.6, 1.5$  Hz, 1H), 7.16 (d,  $J = 2.9$  Hz, 1H), 6.94 - 6.86 (m, 2H), 6.80 (d,  $J = 7.7$  Hz, 1H), 6.75 (dd,  $J = 8.8, 2.9$  Hz, 1H), 6.68 (d,  $J = 8.8$  Hz, 1H), 5.35 (ddt,  $J = 17.2, 10.1, 7.1$  Hz, 1H), 4.99 (dq,  $J = 17.0, 1.5$  Hz, 1H), 4.90 - 4.87 (m, 1H), 3.80 (s, 3H), 3.32 (s, 3H), 3.25 (s, 3H), 2.98 - 2.92 (m, 2H).

**$^{13}\text{C NMR}$**  (100 MHz,  $\text{CDCl}_3$ )  $\delta$  179.1, 153.9, 151.5, 144.4, 133.1, 131.6, 131.2, 127.5, 122.6, 122.1, 119.1, 114.9, 113.7, 112.2, 107.1, 56.8, 55.8, 53.7, 40.5, 26.1.

**IR** (film)  $\nu_{\text{max}}$  3440, 2998, 2797, 2214, 1720, 1621, 1432, 1325, 1320, 1210, 1137, 1052, 1019, 920, 798, 670, 510  $\text{cm}^{-1}$ .

**HRMS** (ESI-TOF)  $m/z$ :  $[\text{M} + \text{H}]^+$  Calcd for  $[\text{C}_{20}\text{H}_{22}\text{NO}_3]^+$  324.1594; Found 324.1592.

Enantiomeric excess of pure compound was determined *via* HPLC analysis using a Chiralpak AD-H column; solvent: hexane/2-propanol = 70/30; flow rate: 1.0 mL/min; detection: at 254 nm):  $t_R$  minor = 5.58 min,  $t_R$  major = 14.91 min.  $[\alpha]_D^{24.0} = +73.5$  ( $c = 0.22$ ,  $\text{CH}_2\text{Cl}_2$  for 90% ee).

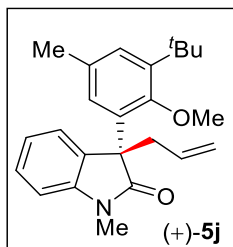

**(R)-3-Allyl-3-(3-(*tert*-butyl)-2-methoxy-5-methylphenyl)-1-methylindolin-2-one [(+)-5j]**: The compound (+)-5j was obtained as orange color solid (0.06 mmol scale of reaction; 20 mg of product; 92%). mp = 110-112 °C.

**<sup>1</sup>H NMR** (500 MHz, CDCl<sub>3</sub>) δ 7.32 (d, *J*=2.2 Hz, 1H), 7.26 (td, *J*=7.6, 1.4 Hz, 1H), 7.18 - 7.17 (m, 1H), 7.04 (dd, *J*=7.3, 1.4 Hz, 1H), 6.99 (td, *J*=7.4, 1.0 Hz, 1H), 6.85 (d, *J*=7.7 Hz, 1H), 5.38 - 5.30 (m, 1H), 4.97 (dq, *J*=17.0, 1.4 Hz, 1H), 4.90 (ddt, *J*=10.2, 2.0, 0.9 Hz, 1H), 3.31 (s, 3H), 3.02 - 2.98 (m, 1H), 2.94 - 2.89 (m, 1H), 2.80 (s, 3H), 2.39 (s, 3H), 1.34 (s, 9H).

**<sup>13</sup>C NMR** (125 MHz, CDCl<sub>3</sub>) δ 178.8, 155.4, 144.3, 142.9, 135.0, 133.7, 132.4, 131.8, 129.2, 127.7, 126.9, 123.2, 122.1, 119.0, 107.3, 62.6, 53.9, 42.7, 35.4, 32.0, 26.1, 21.4.

**IR** (film)  $\nu_{\max}$  3337, 2920, 2106, 1717, 1638, 1405, 1480, 1308, 1224, 1164, 1094, 1001, 931, 818, 748, 707, 603 cm<sup>-1</sup>.

**HRMS** (ESI-TOF) *m/z*: [M + H]<sup>+</sup> Calcd for [C<sub>24</sub>H<sub>30</sub>NO<sub>2</sub>]<sup>+</sup> 364.2271; Found 364.2263.

Enantiomeric excess of pure compound was determined *via* HPLC analysis using a Chiralpak ID-3 column; solvent: hexane/2-propanol = 80/20; flow rate: 1.0 mL/min; detection: at 254 nm): *t<sub>R</sub>* major = 10.52 min. *t<sub>R</sub>* minor = 11.55 min, [α]<sub>D</sub><sup>26.6</sup> = +26.0 (*c* = 0.05, CH<sub>2</sub>Cl<sub>2</sub> for 64% ee).

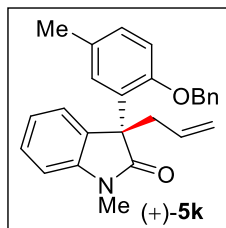

**(R)-3-Allyl-3-(2-(benzyloxy)-5-methylphenyl)-1-methylindolin-2-one [(+)-5k]:** The compound (+)-5k was obtained as orange color gel (0.06 mmol scale of reaction; 21 mg of product; 90%).  $R_f = 0.45$  (20% EtOAc in hexane).

**$^1\text{H NMR}$**  (500 MHz,  $\text{CDCl}_3$ )  $\delta$  7.44 (d,  $J = 2.3$  Hz, 1H), 7.31 - 7.26 (m, 3H), 7.21 (td,  $J = 7.7, 1.3$  Hz, 1H), 7.07 - 7.05 (m, 1H), 6.99 (td,  $J = 7.4, 1.0$  Hz, 1H), 6.91 - 6.88 (m, 3H), 6.74 (d,  $J = 8.2$  Hz, 1H), 6.48 (d,  $J = 7.7$  Hz, 1H), 5.31 (ddt,  $J = 17.2, 10.1, 7.1$  Hz, 1H), 4.98 (dq,  $J = 17.0, 1.4$  Hz, 1H), 4.88 - 4.85 (m, 1H), 4.69 (d,  $J = 10.6$  Hz, 1H), 4.56 (d,  $J = 10.6$  Hz, 1H), 3.03 - 2.96 (m, 2H), 2.60 (s, 3H), 2.40 (s, 3H).

**$^{13}\text{C NMR}$**  (125 MHz,  $\text{CDCl}_3$ )  $\delta$  178.9, 154.0, 144.3, 136.2, 133.2, 131.8, 129.7, 128.8, 128.6, 128.6, 128.5, 128.2, 127.8, 127.0, 122.3, 121.8, 118.9, 111.7, 107.6, 70.2, 53.6, 40.8, 25.2, 20.9.

**IR** (film)  $\nu_{\text{max}}$  3430, 2928, 2857, 2104, 1718, 1612, 1494, 1467, 1376, 1347, 1252, 1137, 1091, 1019, 916, 748, 696, 649  $\text{cm}^{-1}$ .

**HRMS** (ESI-TOF)  $m/z$ :  $[\text{M} + \text{H}]^+$  Calcd for  $[\text{C}_{26}\text{H}_{26}\text{NO}_2]^+$  384.1958; Found 384.1984.

Enantiomeric excess of pure compound was determined *via* HPLC analysis using a Chiralpak AD-H column; solvent: hexane/2-propanol = 60/40; flow rate: 1.0 mL/min; detection: at 254 nm):  $t_{\text{R}}$  minor = 8.62 min,  $t_{\text{R}}$  major = 11.87 min.  $[\alpha]_{\text{D}}^{22.0} = +43.5$  ( $c = 0.13$ ,  $\text{CH}_2\text{Cl}_2$  for 85% ee).

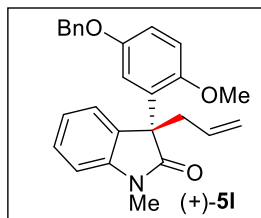

**(R)-3-Allyl-3-(5-(benzyloxy)-2-methoxyphenyl)-1-methylindolin-2-one [(+)-51]:** The compound (+)-**51** was obtained as orange color gel (0.06 mmol scale of reaction; 22 mg of product; 92%).  $R_f = 0.30$  (30% EtOAc in hexane).

**$^1\text{H NMR}$**  (400 MHz,  $\text{CDCl}_3$ )  $\delta$  7.47 - 7.31 (m, 5H), 7.24 - 7.19 (m, 2H), 6.92 (td,  $J = 7.5$ , 1.0 Hz, 1H), 6.88 - 6.79 (m, 3H), 6.68 (d,  $J = 8.8$  Hz, 1H), 5.33 (ddt,  $J = 17.2$ , 10.1, 7.1 Hz, 1H), 5.04 (s, 2H), 5.01 - 4.96 (m, 1H), 4.88 (dd,  $J = 10.2$ , 1.9 Hz, 1H), 3.33 (s, 3H), 3.25 (s, 3H), 2.99 - 2.90 (m, 2H).

**$^{13}\text{C NMR}$**  (100 MHz,  $\text{CDCl}_3$ )  $\delta$  179.1, 153.1, 151.67, 144.4, 137.2, 133.1, 131.6, 131.1, 128.6, 128.0, 127.6, 127.5, 122.6, 122.1, 119.1, 116.1, 113.6, 113.4, 107.1, 70.8, 56.7, 53.7, 40.5, 26.2.

**IR** (film)  $\nu_{\text{max}}$  3434, 2100, 1713, 1640, 1494, 1470, 1375, 1348, 1283, 1225, 1070, 1021, 967, 916, 736, 697, 515  $\text{cm}^{-1}$ .

**HRMS** (ESI-TOF)  $m/z$ :  $[\text{M} + \text{Na}]^+$  Calcd for  $[\text{C}_{26}\text{H}_{25}\text{NO}_3 + \text{Na}]^+$  422.1727; Found 422.1724.

Enantiomeric excess of pure compound was determined *via* HPLC analysis using a Chiralpak AD-H column; solvent: hexane/2-propanol = 60/40; flow rate: 1.0 mL/min; detection: at 254 nm):  $t_R$  minor = 5.47 min,  $t_R$  major = 14.07 min.  $[\alpha]_D^{21.8} = +85.7$  ( $c = 0.21$ ,  $\text{CH}_2\text{Cl}_2$  for 93% ee).

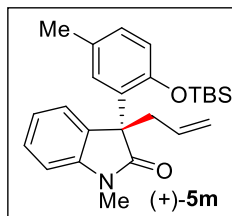

**(R)-3-Allyl-3-(2-((*tert*-butyldimethylsilyloxy)-5-methylphenyl)-1-methylindolin-2-one [(+)-5m]:** The compound (+)-5m was obtained as orange color gel (0.06 mmol scale of reaction; 24 mg of product; 96%).

**$^1\text{H NMR}$**  (400 MHz,  $\text{CDCl}_3$ )  $\delta$  = 7.34 (d,  $J$  = 2.3 Hz, 1H), 7.17 (td,  $J$  = 7.5, 1.7 Hz, 1H), 6.93 - 6.86 (m, 3H), 6.75 (d,  $J$  = 7.7 Hz, 1H), 6.62 (d,  $J$  = 8.2 Hz, 1H), 5.24 (ddt,  $J$  = 17.2, 10.1, 7.1 Hz, 1H), 4.95 - 4.90 (m, 1H), 4.85 (dd,  $J$  = 10.1, 2.0 Hz, 1H), 3.19 (s, 3H), 2.92 (d,  $J$  = 7.1 Hz, 2H), 2.32 (s, 3H), 0.67 (s, 9H), -0.02 (s, 3H), -0.07 (s, 2H).

**$^{13}\text{C NMR}$**  (100 MHz,  $\text{CDCl}_3$ )  $\delta$  = 178.4, 151.4, 144.1, 133.5, 131.9, 129.2 (2C), 128.9, 128.5, 127.2, 122.5, 122.1, 118.8, 117.6, 107.3, 54.2, 42.1, 26.3, 20.9, 19.1, -3.6, -3.6.

**IR** (film)  $\nu_{\text{max}}$  3437, 2960, 2116, 1717, 1628, 1495, 1422, 1318, 1204, 1104, 1084, 1001, 996, 802, 772, 617, 603  $\text{cm}^{-1}$ .

**HRMS** (ESI-TOF)  $m/z$ :  $[\text{M} + \text{Na}]^+$  Calcd for  $[\text{C}_{25}\text{H}_{33}\text{NO}_2\text{Si} + \text{Na}]^+$  430.2173; Found 430.2160.

Enantiomeric excess of pure compound was determined *via* HPLC analysis using a Chiralpak IC-3 column; solvent: hexane/2-propanol = 75/25; flow rate: 1.0 mL/min; detection: at 254 nm):  $t_{\text{R}}$  minor = 6.81 min,  $t_{\text{R}}$  major = 7.86 min.  $[\alpha]_{\text{D}}^{23.7} = +13.0$  ( $c = 0.35$ ,  $\text{CH}_2\text{Cl}_2$  for 82% ee).

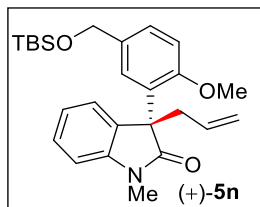

**(*R*)-3-Allyl-3-(5-(((*tert*-butyldimethylsilyl)oxy)methyl)-2-methoxyphenyl)-1-**

**methylinindolin-2-one [(+)-5n]:** The compound (+)-5n was obtained as orange color gel (0.06 mmol scale of reaction; 24 mg of product; 92%).  $R_f = 0.40$  (10% EtOAc in hexane).

**$^1\text{H NMR}$**  (400 MHz,  $\text{CDCl}_3$ )  $\delta$  7.52 (d,  $J = 2.2$  Hz, 1H), 7.25 - 7.16 (m, 2H), 6.91 (t,  $J = 7.4$  Hz, 1H), 6.85 (dd,  $J = 7.4, 1.3$  Hz, 1H), 6.80 (d,  $J = 7.7$  Hz, 1H), 6.71 (d,  $J = 8.3$  Hz, 1H), 5.34 (ddt,  $J = 17.1, 10.0, 7.0$  Hz, 1H), 4.98 (dd,  $J = 17.0, 1.9$  Hz, 1H), 4.88 (dd,  $J = 10.1, 2.0$  Hz, 1H), 4.73 (d,  $J = 1.7$  Hz, 2H), 3.38 (s, 3H), 3.25 (s, 3H), 2.99 (d,  $J = 7.1$  Hz, 2H), 0.95 (s, 9H), 0.11 (d,  $J = 2.2$  Hz, 6H).

**$^{13}\text{C NMR}$**  (100 MHz,  $\text{CDCl}_3$ )  $\delta$  179.3, 156.2, 144.4, 133.7, 133.3, 131.7, 129.4, 127.4, 126.4, 125.7, 122.6, 122.1, 119.0, 112.2, 107.0, 64.9, 56.1, 53.8, 40.5, 26.1, 26.0, 18.4, -5.1.

**IR** (film)  $\nu_{\text{max}}$  3152, 2916, 2825, 1730, 1601, 1429, 1387, 1277, 1110, 1090, 782, 563  $\text{cm}^{-1}$ .

**HRMS** (ESI-TOF)  $m/z$ :  $[\text{M} + \text{Na}]^+$  Calcd for  $[\text{C}_{26}\text{H}_{35}\text{NO}_3\text{Si} + \text{Na}]^+$  460.2278; Found 460.2279.

Enantiomeric excess of pure compound was determined *via* HPLC analysis using a Chiralpak IC-3 column; solvent: hexane/2-propanol = 85/15; flow rate: 1.0 mL/min; detection: at 254 nm):  $t_R$  major = 5.78 min.  $t_R$  minor = 7.36 min,  $[\alpha]_D^{25.0} = +57.5$  ( $c = 0.39$ ,  $\text{CH}_2\text{Cl}_2$  for 93% ee).



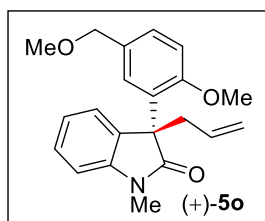

**(*R*)-3-Allyl-3-(2-methoxy-5-(methoxymethyl)phenyl)-1-methylindolin-2-one [(+)-5o]:**

The compound (+)-5o was obtained as orange color gel (0.06 mmol scale of reaction; 19 mg of product; 93%).  $R_f = 0.51$  (30% EtOAc in hexane).

**$^1\text{H NMR}$**  (500 MHz,  $\text{CDCl}_3$ )  $\delta$  7.57 (d,  $J = 2.1$  Hz, 1H), 7.29 - 7.22 (m, 2H), 6.95 (td,  $J = 7.4, 1.0$  Hz, 1H), 6.90 (dd,  $J = 7.4, 1.3$  Hz, 1H), 6.84 (dd,  $J = 7.8, 0.8$  Hz, 1H), 6.76 (d,  $J = 8.3$  Hz, 1H), 5.36 (ddt,  $J = 17.1, 10.1, 7.1$ , 1H), 5.02 (dq,  $J = 17.0, 1.4$  Hz, 1H), 4.93 - 4.90 (m, 1H), 4.51 - 4.45 (m, 2H), 3.43 (d,  $J = 5.2$  Hz, 6H), 3.29 (s, 3H), 3.05 - 3.04 (m, 2H).

**$^{13}\text{C NMR}$**  (125 MHz,  $\text{CDCl}_3$ )  $\delta$  179.2, 156.7, 144.4, 133.1, 131.6, 130.4, 129.7, 128.3, 127.4, 127.4, 122.6, 122.1, 119.1, 112.1, 107.0, 74.6, 58.0, 56.0, 53.7, 40.6, 26.1.

**IR** (film)  $\nu_{\text{max}}$  3432, 2927, 2401, 2111, 1711, 1643, 1469, 1348, 1257, 1093, 1020, 916, 751, 602  $\text{cm}^{-1}$ .

**HRMS** (ESI-TOF)  $m/z$ :  $[\text{M} + \text{H}]^+$  Calcd for  $[\text{C}_{21}\text{H}_{24}\text{NO}_3]^+$  338.1751; Found 338.1777.

Enantiomeric excess of pure compound was determined *via* HPLC analysis using a Chiralpak AD-H column; solvent: hexane/2-propanol = 70/30; flow rate: 1.0 mL/min; detection: at 254 nm):  $t_R$  minor = 4.17 min,  $t_R$  major = 6.60 min.  $[\alpha]_D^{22.1} = +101.5$  ( $c = 0.31$ ,  $\text{CH}_2\text{Cl}_2$  for 94% ee).

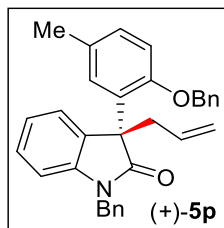

**(R)-3-Allyl-1-benzyl-3-(2-(benzyloxy)-5-methylphenyl)indolin-2-one [(+)-5p]:** The compound (+)-**5p** was obtained as orange color gel (0.06 mmol scale of reaction; 27 mg of product; 93%).  $R_f = 0.30$  (10% EtOAc in hexane).

**$^1\text{H NMR}$**  (500 MHz,  $\text{CDCl}_3$ )  $\delta$  7.47 (d,  $J = 2.2$  Hz, 1H), 7.39 - 7.31 (m, 3H), 7.25 - 7.20 (m, 4H), 7.13 - 7.05 (m, 2H), 6.97 - 6.91 (m, 4H), 6.73 (d,  $J = 8.3$  Hz, 1H), 6.41 (d,  $J = 7.8$  Hz, 1H), 5.39 (ddt,  $J = 17.1, 10.2, 7.0$  Hz, 1H), 5.09 - 5.06 (m, 1H), 4.93 - 4.90 (m, 2H), 4.65 (d,  $J = 11.0$  Hz, 1H), 4.57 (d,  $J = 11.0$  Hz, 1H), 3.37 (d,  $J = 15.8$  Hz, 1H), 3.12 - 3.04 (m, 2H), 2.41 (s, 3H).

**$^{13}\text{C NMR}$**  (125 MHz,  $\text{CDCl}_3$ )  $\delta$  179.0, 152.0, 143.8, 136.7, 136.4, 133.3, 132.1, 129.7, 128.8, 128.8, 128.6, 128.5, 128.4, 128.3, 127.9, 127.6, 127.1, 126.9, 122.5, 121.9, 119.3, 111.8, 108.8, 70.0, 53.5, 43.4, 41.0, 20.9.

**IR** (film)  $\nu_{\text{max}}$  3430, 2109, 1715, 1641, 1488, 1348, 1247, 1174, 1015, 917, 805, 746, 697  $\text{cm}^{-1}$ .

**HRMS** (ESI-TOF)  $m/z$ :  $[\text{M} + \text{H}]^+$  Calcd for  $[\text{C}_{32}\text{H}_{30}\text{NO}_2]^+$  460.2271; Found 460.2288.

Enantiomeric excess of pure compound was determined *via* HPLC analysis using a Chiralpak AD-H column; solvent: hexane/2-propanol = 60/40; flow rate: 1.0 mL/min; detection: at 254 nm):  $t_R$  minor = 8.62 min,  $t_R$  major = 11.87 min.  $[\alpha]_D^{22.1} = +111.9$  ( $c = 0.34$ ,  $\text{CH}_2\text{Cl}_2$  for 85% ee).

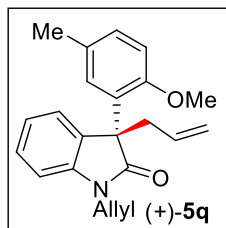

**(R)-1,3-Diallyl-3-(2-methoxy-5-methylphenyl)indolin-2-one [(+)-5q]:** The compound (+)-5q was obtained as orange color gel (0.06 mmol scale of reaction; 18 mg of product; 90%).  $R_f = 0.40$  (20% EtOAc in hexane).

**$^1\text{H NMR}$**  (500 MHz,  $\text{CDCl}_3$ )  $\delta$  7.41 (d,  $J = 2.1$  Hz, 1H), 7.21 (td,  $J = 7.5, 1.7$  Hz, 1H), 7.07 (dd,  $J = 8.2, 2.1$  Hz, 1H), 6.98 – 6.91 (m, 2H), 6.86 (d,  $J = 7.7$  Hz, 1H), 6.70 (d,  $J = 8.2$  Hz, 1H), 6.01 – 5.83 (m, 1H), 5.44 – 5.36 (m, 2H), 5.29 (dq,  $J = 10.1, 1.5$  Hz, 1H), 5.07 – 5.02 (m, 1H), 4.96 – 4.92 (m, 1H), 4.50 (ddt,  $J = 16.0, 5.5, 1.7$  Hz, 1H), 4.36 (ddt,  $J = 16.1, 5.7, 1.7$  Hz, 1H), 3.39 (s, 3H), 3.04 (d,  $J = 7.2$  Hz, 2H), 2.39 (s, 9H).

**$^{13}\text{C NMR}$**  (125 MHz,  $\text{CDCl}_3$ )  $\delta$  178.8, 155.1, 143.6, 133.4, 132.5, 131.8, 130.0, 129.3, 128.9, 128.3, 127.2, 122.6, 122.0, 119.2, 117.6, 112.5, 108.0, 55.9, 53.6, 42.7, 40.8, 20.9.

**IR** (film)  $\nu_{\text{max}}$  3310, 2219, 1719, 1602, 1448, 1322, 1208, 1107, 1021, 940, 850, 716, 607  $\text{cm}^{-1}$ .

**HRMS** (ESI-TOF)  $m/z$ :  $[\text{M} + \text{H}]^+$  Calcd for  $[\text{C}_{22}\text{H}_{24}\text{NO}_2]^+$  334.1802; Found 334.1810.

Enantiomeric excess of pure compound was determined *via* HPLC analysis using a Chiralpak AD-H column; solvent: hexane/2-propanol = 70/30; flow rate: 1.0 mL/min; detection: at 254 nm):  $t_R$  minor = 4.45 min,  $t_R$  major = 9.93 min.  $[\alpha]_D^{24.3} = +69.0$  ( $c = 0.39$ ,  $\text{CH}_2\text{Cl}_2$  for 90% ee).

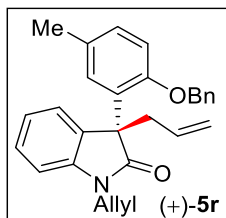

**(R)-1,3-Diallyl-3-(2-(benzyloxy)-5-methylphenyl)indolin-2-one** [(+)-5r]: The compound (+)-5r was obtained as orange color gel (0.06 mmol scale of reaction; 22 mg of product; 87%).  $R_f = 0.50$  (20% EtOAc in hexane).

**$^1\text{H NMR}$**  (500 MHz,  $\text{CDCl}_3$ )  $\delta = 7.44$  (d,  $J = 2.1$  Hz, 1H), 7.30 - 7.29 (m, 1H), 7.28 - 7.25 (m, 2H), 7.18 (td,  $J = 7.6, 1.4$  Hz, 1H), 7.04 (ddd,  $J = 8.1, 2.2, 0.8$  Hz, 1H), 6.97 (td,  $J = 7.5, 1.0$  Hz, 1H), 6.91 (ddd,  $J = 7.4, 1.4, 0.6$  Hz, 1H), 6.87 - 6.85 (m, 2H), 6.71 (d,  $J = 8.2$  Hz, 1H), 6.55 (dt,  $J = 7.8, 0.8$  Hz, 1H), 5.60 (dddd,  $J = 17.3, 10.3, 6.3, 4.8$  Hz, 1H), 5.40 - 5.32 (m, 1H), 5.16 (dq,  $J = 17.2, 1.6$  Hz, 1H), 5.08 (dq,  $J = 10.3, 1.5$  Hz, 1H), 5.00 - 4.99 (m, 1H), 4.90 (ddd,  $J = 10.0, 1.9, 0.9$  Hz, 1H), 4.70 (d,  $J = 11.1$  Hz, 1H), 4.58 (d,  $J = 11.1$  Hz, 1H), 4.29 (ddt,  $J = 16.2, 4.8, 1.9$  Hz, 1H), 3.13 (ddt,  $J = 16.3, 6.3, 1.5$  Hz, 1H), 3.04 - 3.01 (m, 2H), 2.39 (s, 3H).

**$^{13}\text{C NMR}$**  (125 MHz,  $\text{CDCl}_3$ )  $\delta = 178.5, 153.9, 143.7, 136.3, 133.3, 132.5, 131.9, 129.7, 128.8, 128.6, 128.6, 128.3, 128.3, 127.8, 126.9, 122.4, 121.8, 119.2, 117.1, 111.8, 108.6, 70.0, 53.5, 42.0, 41.0, 20.9$ .

**IR** (film)  $\nu_{\text{max}}$  3420, 2119, 1721, 1622, 1418, 1352, 1278, 1137, 1091, 949, 800, 706, 617  $\text{cm}^{-1}$ .

**HRMS** (ESI-TOF)  $m/z$ :  $[\text{M} + \text{Na}]^+$  Calcd for  $[\text{C}_{28}\text{H}_{27}\text{NO}_2 + \text{Na}]^+$  432.1934; Found 432.1943.

Enantiomeric excess of pure compound was determined *via* HPLC analysis using a Chiralpak AD-H column; solvent: hexane/2-propanol = 70/30; flow rate: 1.0 mL/min;

detection: at 254 nm):  $t_R$  minor = 7.78 min,  $t_R$  major = 22.76 min.  $[\alpha]_D^{23.3} = +66.0$  ( $c = 0.05$ ,  $\text{CH}_2\text{Cl}_2$  for 84% ee).

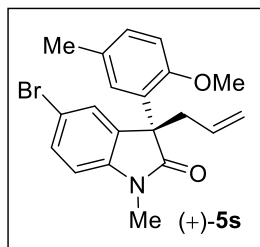

**(R)-3-Allyl-5-bromo-3-(2-methoxy-5-methylphenyl)-1-methylindolin-2-one [(+)-5s]:**

The compound (+)-**5s** was obtained as colorless gel (0.05 mmol scale of reaction; 15 mg of product; 81% yield).  $R_f = 0.40$  (30% EtOAc in hexane).

$^1\text{H NMR}$  (500 MHz,  $\text{CDCl}_3$ )  $\delta = 7.38$  (d,  $J = 2.1$ , 1H), 7.24 (td,  $J = 7.6$ , 1.4, 1H), 7.08 – 7.04 (m, 1H), 6.99 – 6.89 (m, 1H), 6.84 (d,  $J = 7.8$ , 1H), 6.69 (d,  $J = 8.2$ , 1H), 5.36 (ddt,  $J = 17.2$ , 10.1, 7.1, 1H), 5.08 – 4.96 (m, 1H), 4.91 (ddt,  $J = 10.2$ , 2.0, 1.0, 1H), 3.39 (s, 3H), 3.29 (s, 3H), 3.02 (dt,  $J = 7.2$ , 1.2, 2H), 2.38 (s, 3H).

$^{13}\text{C NMR}$  (125 MHz,  $\text{CDCl}_3$ )  $\delta = 179.4$ , 155.1, 144.4, 133.4, 131.7, 130.0, 129.4, 128.9, 128.3, 127.4, 122.6, 122.1, 119.0, 112.5, 107.0, 56.2, 53.8, 40.5, 26.2, 20.9.

**IR** (film) 2803, 2729, 1690, 1611, 1236, 1102, 999, 768, 519  $\text{cm}^{-1}$ .

**HRMS** (ESI)  $m/z$   $[\text{M} + \text{H}]^+$  Calcd for  $[\text{C}_{20}\text{H}_{20}\text{BrNO}_2 + \text{H}]^+$  386.0750; Found 386.0741.

Enantiomeric excess of pure compound was determined via HPLC analysis using a Chiralpak IB column; solvent: hexane/2-propanol = 90/10; flow rate: 1.0 mL/min; detection: at 273 nm:  $t_R$  minor = 9.03 min,  $t_R$  major = 6.30 min.  $[\alpha]_D^{22.6} = +60.0$  ( $c = 0.1$ ,  $\text{CHCl}_3$  for 92% ee).

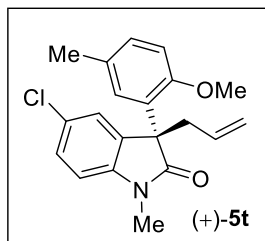

**(R)-3-Allyl-5-chloro-3-(2-methoxy-5-methylphenyl)-1-methylindolin-2-one [(+)-5t]:**

The compound (+)-5t was obtained as colorless gel (0.052 mmol scale of reaction; 16 mg of product; 91%).  $R_f = 0.45$  (30% EtOAc in hexane).

**$^1\text{H NMR}$**  (500 MHz,  $\text{CDCl}_3$ )  $\delta = 7.38 - 7.33$  (m, 1H), 7.21 (dd,  $J = 8.2, 2.1$ , 1H), 7.08 (ddd,  $J = 8.3, 2.2, 0.9$ , 1H), 6.95 (dd,  $J = 64.0, 2.0$ , 1H), 6.78 – 6.67 (m, 2H), 5.35 (ddt,  $J = 15.6, 10.1, 7.3$ , 1H), 5.04 (ddd,  $J = 17.1, 2.0, 1.1$ , 1H), 4.94 (ddt,  $J = 10.1, 1.9, 0.9$ , 1H), 3.42 (s, 3H), 3.27 (d,  $J = 3.0$ , 3H), 3.09 – 2.93 (m, 2H), 2.38 (s, 3H).

**$^{13}\text{C NMR}$**  (125 MHz,  $\text{CDCl}_3$ )  $\delta = 178.9, 154.9, 143.0, 135.1, 131.2, 130.2, 129.2, 128.5, 128.2, 127.4, 127.3, 123.1, 119.5, 112.2, 107.9, 56.0, 53.9, 40.4, 26.3, 20.9$ .

**IR** (film) 2799, 2614, 1601, 1526, 1165, 1098, 973, 842, 416  $\text{cm}^{-1}$ .

**HRMS** (ESI)  $m/z$   $[\text{M} + \text{H}]^+$  Calcd for  $[\text{C}_{20}\text{H}_{20}\text{ClNO}_2 + \text{H}]^+$  342.1255; Found 342.1252.

Enantiomeric excess of pure compound was determined via HPLC analysis using a Chiralpak IB column; solvent: hexane/2-propanol = 90/10; flow rate: 1.0 mL/min; detection: at 254 nm):  $t_R$  minor = 8.63 min,  $t_R$  major = 6.38 min.  $[\alpha]_D^{22.0} = +174.1$  ( $c = 0.1$ ,  $\text{CHCl}_3$  for 92% ee).

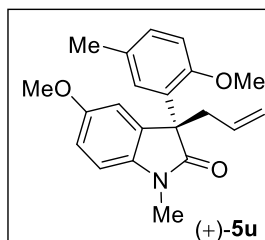

**(R)-3-Allyl-5-methoxy-3-(2-methoxy-5-methylphenyl)-1-methylindolin-2-one [(+)-5u]:** The compound (+)-**5u** was obtained as yellowish gel (0.04 mmol scale of reaction; 10 mg of product; 76% yield).  $R_f = 0.25$  (30% EtOAc in hexane).

**$^1\text{H NMR}$**  (400 MHz,  $\text{CDCl}_3$ )  $\delta$  7.41 – 7.31 (m, 1H), 7.09 – 6.98 (m, 1H), 6.80 – 6.71 (m, 2H), 6.68 (d,  $J = 8.2$ , 1H), 6.54 (d,  $J = 2.3$ , 1H), 5.36 (ddt,  $J = 17.1, 10.1, 7.1$ , 1H), 5.03 (dd,  $J = 16.7, 2.1$ , 1H), 4.96 – 4.87 (m, 1H), 3.73 (s, 3H), 3.42 (s, 3H), 3.26 (s, 3H), 3.00 (d,  $J = 7.1$ , 2H), 2.37 (s, 3H).

**$^{13}\text{C NMR}$**  (125 MHz,  $\text{CDCl}_3$ )  $\delta$  179.0, 155.7, 155.1, 138.1, 134.8, 131.8, 130.0, 129.3, 128.9, 128.3, 119.0, 112.5, 111.4, 110.3, 107.2, 56.2, 55.7, 54.2, 40.6, 26.3, 20.9.

**IR** (film) 2402, 2326, 1546, 1469, 1191, 1126, 984, 823, 559  $\text{cm}^{-1}$ .

**HRMS** (ESI)  $m/z$   $[\text{M} + \text{H}]^+$  Calcd for  $[\text{C}_{21}\text{H}_{23}\text{NO}_3 + \text{H}]^+$  338.1751; Found 338.1734.

Enantiomeric excess of pure compound was determined via HPLC analysis using a Chiralpak IB column; solvent: hexane/2-propanol = 90/10; flow rate: 1.0 mL/min; detection: at 254 nm):  $t_R$  minor = 10.62 min,  $t_R$  major = 7.59 min.  $[\alpha]_D^{22.1} = +162.4$  ( $c = 0.1$ ,  $\text{CHCl}_3$  for 84% ee).

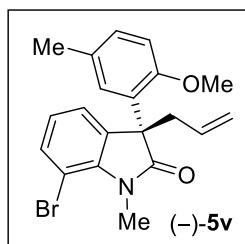

**(R)-3-Allyl-7-bromo-3-(2-methoxy-5-methylphenyl)-1-methylindolin-2-one [(-)-5v]:** The compound (-)-**5v** was obtained as yellow liquid (0.023 mmol scale of reaction; 7 mg of product; 83% yield).  $R_f = 0.20$  (30% EtOAc in hexane).

**<sup>1</sup>H NMR** (500 MHz, CDCl<sub>3</sub>) δ 7.43 – 7.32 (m, 2H), 7.07 (dd, *J* = 8.2, 2.1, 1H), 6.84 – 6.75 (m, 2H), 6.69 (d, *J* = 8.2, 1H), 5.59 – 5.28 (m, 1H), 5.13 – 4.86 (m, 2H), 3.66 (s, 3H), 3.45 (s, 3H), 3.08 – 2.90 (m, 2H), 2.38 (s, 3H).

**<sup>13</sup>C NMR** (125 MHz, CDCl<sub>3</sub>) δ 179.5, 155.1, 144.4, 131.7, 130.0, 129.4, 128.9, 128.3, 127.4, 122.6, 122.1, 119.0, 112.5, 107.0, 100.0, 56.2, 53.8, 53.4, 40.5, 26.2.

**IR** (film) 2699, 2601, 1524, 1496, 1191, 1063, 911, 519 cm<sup>-1</sup>.

**HRMS** (ESI) *m/z* [M + H]<sup>+</sup> Calcd for [C<sub>20</sub>H<sub>20</sub>BrNO<sub>2</sub> + H]<sup>+</sup> 386.0750; Found 386.0739.

Enantiomeric excess of pure compound was determined via HPLC analysis using a Chiralpak IB column; solvent: hexane/2-propanol = 90/10; flow rate: 1.0 mL/min; detection: at 273 nm): *t*R minor = 5.17 min, *t*R major = 4.40 min. [α]<sub>D</sub><sup>22.4</sup> = -119.6 (*c* = 0.1, CHCl<sub>3</sub> for 90% ee).

**Procedure for catalytic enantioselective decarboxylative allylation of **6w**:** In an oven-dried round-bottom flask, Et<sub>2</sub>O (1.5 mL) was degassed by using nitrogen balloon at room temperature over a period of 10 minutes. 0.025 mol% of Pd<sub>2</sub>(dba)<sub>3</sub> and 0.075 mol% of ligand were added to it and stirring was continued for 20 minutes to make the complex mixture. After that reaction mixture was cooled to the -25 °C. In another vessel (1:1) mixture of carbonate (**6w**) (0.06 mmol; 1.0 equiv) were dissolved in dry degassed (1.5 mL) of Et<sub>2</sub>O, then the resulting solution was added drop-wise to the complex solution and stirring was continued for specified time at -25 °C. After complete consumption of starting material (monitored by TLC) the reaction mixture was concentrated and purified by column chromatography to afford the desired enantioenriched mixture of compounds **8a** and **8b**. Further this mixture was reacted with TBSCl (4.0 equiv.) in presence of imidazole (8.0 equiv.) to afford compounds **8a** and **5m**.



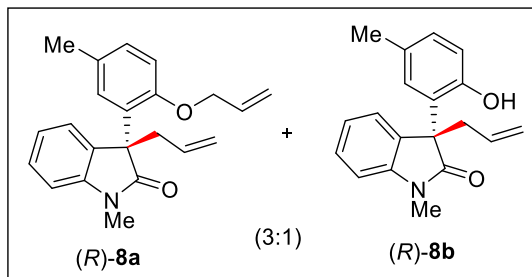

Compounds (*R*)-**8a** and (*R*)-**8b** are inseparable mixture in column chromatography, we have separated these two compounds in HPLC and we have observed 3:1 ratio of the peaks in the HPLC chromatogram; Enantiomeric excess of pure compound was determined *via* HPLC analysis using a Chiralpak ID-3 column; solvent: hexane/2-propanol = 60/40; flow rate: 1.0 mL/min; detection: at 254 nm). For minor compound  $t_{R1}$  minor = 5.38 min,  $t_{R}$  major = 5.72 min. (94% ee). For major compound  $t_{R1}$  minor = 6.90 min,  $t_{R}$  major = 11.04 min. (85% ee). These two compounds were separated by after TBSCl reaction and provided individual data for the same.

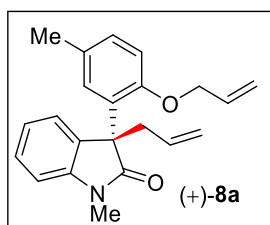

(*R*)-3-Allyl-3-(2-(allyloxy)-5-methylphenyl)-1-methylindolin- 2-one [(+)-**8a**]: The compound (+)-**8a** was obtained as orange color gel (0.06 mmol scale of reaction; 14 mg of product; 71%).  $R_f$  = 0.35 (20% EtOAc in hexane).

**<sup>1</sup>H NMR** (400 MHz, CDCl<sub>3</sub>)  $\delta$  7.40 (d,  $J$  = 2.0 Hz, 1H), 7.23 (t,  $J$  = 7.6 Hz, 1H), 7.04 (dt,  $J$  = 8.3, 1.4 Hz, 1H), 6.95 (t,  $J$  = 7.4 Hz, 1H), 6.89 (d,  $J$  = 7.2 Hz, 1H), 6.80 (d,  $J$  = 7.7 Hz, 1H), 6.65 (d,  $J$  = 8.2 Hz, 1H), 5.51 - 5.40 (m, 1H), 5.38 - 5.30 (m, 1H), 5.09 - 4.93 (m, 3H), 5.06 - 4.98 (m, 1H), 4.20 (dd,  $J$  = 12.0, 6.1 Hz, 1H), 4.01 (dd,  $J$  = 12.1, 5.5 Hz, 1H), 3.22 (s, 3H), 3.01 (d,  $J$  = 7.2 Hz, 2H), 2.38 (s, 3H).

**<sup>13</sup>C NMR** (100 MHz, CDCl<sub>3</sub>)  $\delta$  179.1, 153.9, 144.6, 133.5, 133.2, 131.8, 129.9, 129.2, 128.8, 128.5, 127.3, 122.5, 122.0, 119.0, 117.6, 112.8, 107.1, 69.5, 53.7, 40.7, 26.1, 20.9.

**IR** (film)  $\nu_{\max}$  3430, 2219, 1718, 1662, 1430, 1362, 1208, 1147, 1021, 920, 820, 713, 610  $\text{cm}^{-1}$ .

**HRMS** (ESI-TOF)  $m/z$ :  $[\text{M} + \text{Na}]^+$  Calcd for  $[\text{C}_{22}\text{H}_{23}\text{NO}_2 + \text{Na}]^+$  356.1621; Found 356.1650.

Enantiomeric excess of pure compound was determined *via* HPLC analysis using a Chiralpak ID-3 column; solvent: hexane/2-propanol = 70/30; flow rate: 1.0 mL/min; detection: at 254 nm):  $t_{\text{R}}$  minor = 6.00 min,  $t_{\text{R}}$  major = 9.68 min.  $[\alpha]_{\text{D}}^{22.0} = +33.0$  ( $c = 0.13$ , MeOH for 85% ee).

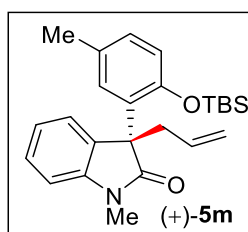

**(*R*)-3-Allyl-3-(2-((*tert*-butyldimethylsilyloxy)-5-methylphenyl)-1-methylindolin-2-one [(+)-5m]:** The compound (+)-5m was obtained as orange color gel (0.06 mmol scale of reaction; 5 mg of product; 22% yield.

**$^1\text{H}$  NMR** (400 MHz,  $\text{CDCl}_3$ )  $\delta$  7.34 (d,  $J = 2.3$  Hz, 1H), 7.17 (td,  $J = 7.5, 1.7$  Hz, 1H), 6.93 - 6.86 (m, 3H), 6.75 (d,  $J = 7.7$  Hz, 1H), 6.62 (d,  $J = 8.2$  Hz, 1H), 5.24 (ddt,  $J = 17.2, 10.1, 7.1$  Hz, 1H), 4.95 - 4.90 (m, 1H), 4.85 (dd,  $J = 10.1, 2.0$  Hz, 1H), 3.19 (s, 3H), 2.92 (d,  $J = 7.1$  Hz, 2H), 2.32 (s, 3H), 0.67 (s, 9H), -0.02 (s, 3H), -0.07 (s, 2H).

**$^{13}\text{C}$  NMR** (100 MHz,  $\text{CDCl}_3$ )  $\delta$  178.4, 151.4, 144.1, 133.5, 131.9, 129.2 (2C), 128.9, 128.5, 127.2, 122.5, 122.1, 118.8, 117.6, 107.3, 54.2, 42.1, 26.3, 20.9, 19.1, -3.6, -3.6.

**IR** (film)  $\nu_{\max}$  3437, 2960, 2116, 1717, 1628, 1495, 1422, 1318, 1204, 1104, 1084, 1001, 996, 802, 772, 617, 603  $\text{cm}^{-1}$ .

**HRMS** (ESI-TOF)  $m/z$ :  $[M + Na]^+$  Calcd for  $[C_{25}H_{33}NO_2Si + Na]^+$  430.2173; Found 430.2160.

Enantiomeric excess of pure compound was determined *via* HPLC analysis using a Chiralpak IC-3 column; solvent: hexane/2-propanol = 75/25; flow rate: 1.0 mL/min; detection: at 254 nm):  $t_R$  minor = 6.67 min,  $t_R$  major = 7.36 min.  $[\alpha]_D^{24.0} = +18.0$  ( $c = 0.28$ ,  $CH_2Cl_2$  for 94% ee).

**Synthetic procedure for compound (+)-13:**

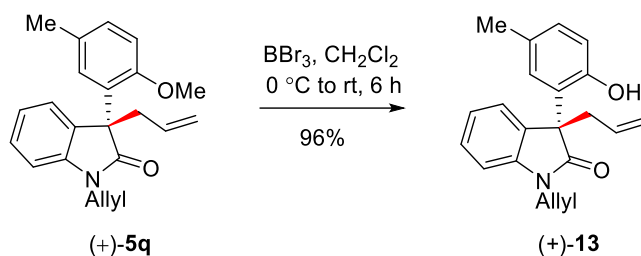

In an oven dried round-bottom flask, compound (+)-**5q** (100 mg; 0.28 mmol; 1.0 equiv) was taken in dry dichloromethane under nitrogen atmosphere. After cooling the reaction mixture at 0 °C, boran tribromide (53  $\mu\text{L}$ ); 0.56 mmol; 2.0 equiv.) was added stirring was continued to room temperature for 6 h. After completion of the reaction (judged by TLC analysis under UV and  $I_2$  stain), diluted with EtOAc (20 mL) and quenched with  $H_2O$ . Then the organic layer was separated, dried with  $Na_2SO_4$ . The crude mixture was purified by column chromatography using EtOAc and hexane mixture as eluent to afford the desired product (+)-**13**.

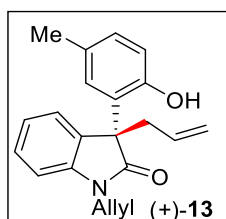

**(R)-1,3-diallyl-3-(2-hydroxy-5-methylphenyl)indolin-2-one [(+)-13]**: The compound (+)-**13** was obtained as orange color gel (0.28 mmol scale of reaction; 93 mg of product; 96%).  $R_f = 0.50$  (20% EtOAc in hexane).

**<sup>1</sup>H NMR** (400 MHz, CDCl<sub>3</sub>)  $\delta$  10.31 (s, 1H), 7.41 (d,  $J = 7.4$  Hz, 1H), 7.35 (td,  $J = 7.7, 1.3$  Hz, 1H), 7.24 (dd,  $J = 8.7, 6.4$  Hz, 1H), 6.99 (dd,  $J = 8.1, 2.1$  Hz, 1H), 6.94 - 6.91 (m, 2H), 6.80 (d,  $J = 2.1$  Hz, 1H), 5.78 (ddt,  $J = 17.4, 10.3, 5.2$  Hz, 1H), 5.29 - 5.16 (m, 3H), 5.04 - 4.99 (m, 1H), 4.91 (dd,  $J = 10.0, 1.9$  Hz, 1H), 4.55 - 4.33 (m, 1H), 4.24 (ddt,  $J = 16.3, 5.3, 1.7$  Hz, 1H), 3.47 (dd,  $J = 13.7, 8.3$  Hz, 1H), 2.93 (dd,  $J = 13.7, 6.3$  Hz, 1H), 2.14 (s, 3H).

**<sup>13</sup>C NMR** (100 MHz, CDCl<sub>3</sub>)  $\delta$  180.8, 154.6, 142.3, 132.0, 130.7, 130.0, 129.9, 129.1, 128.7, 128.5, 126.6, 123.5, 123.0, 120.1, 119.7, 117.9, 109.9, 57.8, 42.7, 39.4, 20.6.

**IR** (film)  $\nu_{\max}$  3427, 2860, 2216, 1725, 1630, 1425, 1420, 1398, 1264, 1114, 1034, 1001, 946, 856, 788, 714, 714, 653 cm<sup>-1</sup>.

**HRMS** (ESI-TOF)  $m/z$ : [M + Na]<sup>+</sup> Calcd for [C<sub>21</sub>H<sub>21</sub>NO<sub>2</sub> + Na]<sup>+</sup> 342.1465; Found 338.1481.

Enantiomeric excess of pure compound was determined *via* HPLC analysis using a Chiralpak IC-3 column; solvent: hexane/2-propanol = 70/30; flow rate: 1.0 mL/min; detection: at 254 nm):  $t_R$  major = 4.37 min.  $t_R$  minor = 6.72 min,  $[\alpha]_D^{22.4} = +427.0$  ( $c = 0.047$ , MeOH for 90% ee).

**Synthetic procedure for compound (+)-12a:**

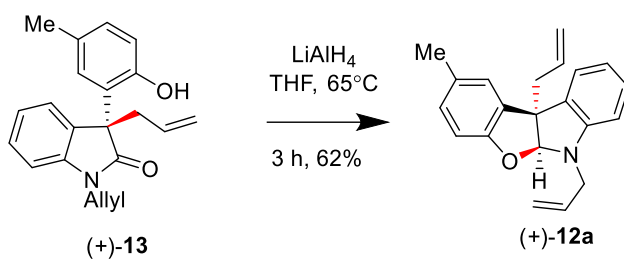

In an oven-dried round-bottom flask was charged with (+)-**13** (50 mg; 0.20 mmol; 1.0 equiv) was taken in tetrahydrofuran under nitrogen atmosphere. To this solution  $\text{LiAlH}_4$  (16 mg; 0.40 mmol; 2.0 equiv.) was added at RT, stirring was continued at 65 °C for 3 h. After completion of the reaction (Judged by TLC analysis under UV and  $\text{I}_2$  stain), quenched with EtOAc (15 mL) and diluted with water. Then the organic layer was separated, dried with  $\text{Na}_2\text{SO}_4$ . The crude mixture was purified by column chromatography using EtOAc and hexane mixture as eluent to afford the desired product (+)-**12a**.

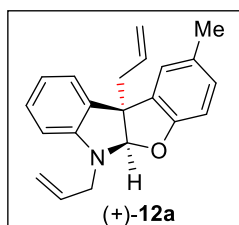

**(R)-6,10b-Diallyl-2-methyl-5a,10b-dihydro-6H-benzofuro[2,3-b]indole [(+)-12a]**: The compound (+)-**12a** was obtained as orange color gel (0.20 mmol scale of reaction; 38 mg of product; 62%).  $R_f = 0.72$  (5% EtOAc in hexane).

**$^1\text{H NMR}$**  (400 MHz,  $\text{CDCl}_3$ )  $\delta$  7.24 - 7.21 (m, 1H), 7.10 (d,  $J = 1.7$  Hz, 1H), 7.05 (t,  $J = 7.7$  Hz, 1H), 6.87 (dd,  $J = 8.2, 1.8$  Hz, 1H), 6.71 (t,  $J = 7.3$  Hz, 1H), 6.66 (d,  $J = 8.1$  Hz, 1H), 6.42 (d,  $J = 7.8$  Hz, 1H), 6.01 (s, 1H), 5.90 (ddt,  $J = 16.0, 10.5, 5.3$  Hz, 1H), 5.53 (ddt,  $J = 17.2, 10.1, 7.1$  Hz, 1H), 5.28 (dd,  $J = 17.1, 1.9$  Hz, 1H), 5.19 (dd,  $J = 10.4, 1.7$  Hz, 1H), 5.16 - 5.02 (m, 2H), 4.03 - 4.01 (m, 2H), 2.80 (d,  $J = 7.3$  Hz, 2H), 2.27 (s, 3H).

**<sup>13</sup>C NMR** (100 MHz, CDCl<sub>3</sub>) δ 156.6, 148.4, 133.4, 133.3, 132.1, 131.5, 130.2, 128.7, 128.1, 123.5, 122.3, 118.6, 118.2, 117.1, 109.4, 106.4, 105.3, 58.4, 47.8, 41.7, 20.9.

**IR** (film)  $\nu_{\max}$  3337, 2960, 2816, 2101, 1680, 1465, 1410, 1378, 1204, 1110, 1074, 1021, 906, 799, 708, 650 cm<sup>-1</sup>.

**HRMS** (ESI-TOF)  $m/z$ : [M + H]<sup>+</sup> Calcd for [C<sub>21</sub>H<sub>22</sub>NO]<sup>+</sup> 304.1696; Found 304.1717.

Enantiomeric excess of pure compound was determined *via* HPLC analysis using a Chiralpak AD-H column; solvent: hexane/2-propanol = 95/05; flow rate: 1.0 mL/min; detection: at 254 nm):  $t_R$  major = 4.37 min.  $t_R$  minor = 5.34 min,  $[\alpha]_D^{24.2} = +63.6$  ( $c = 0.13$ , MeOH for 90% ee).

## Spectral graphs and HPLC data

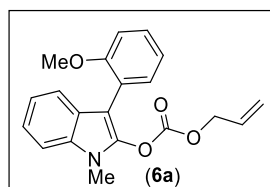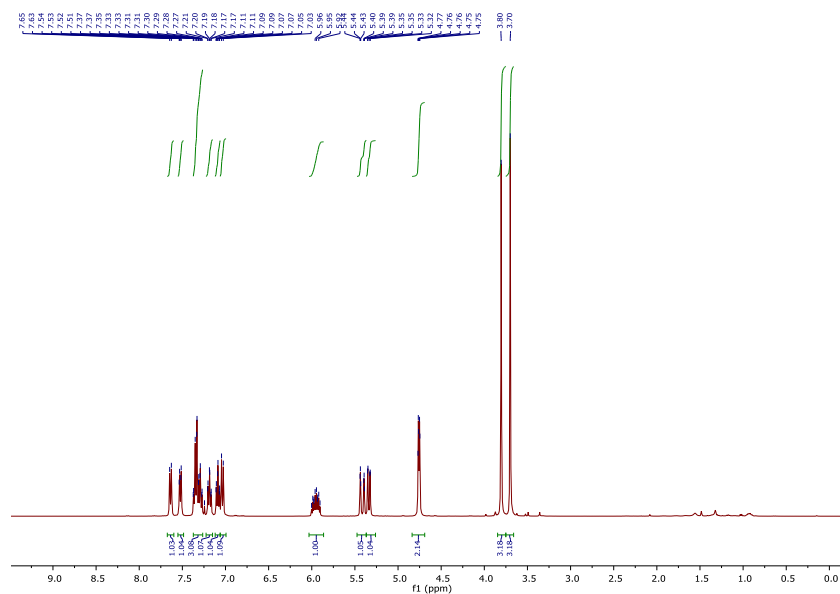 $^1\text{H}$  NMR (400 MHz,  $\text{CDCl}_3$ ) of compound **6a**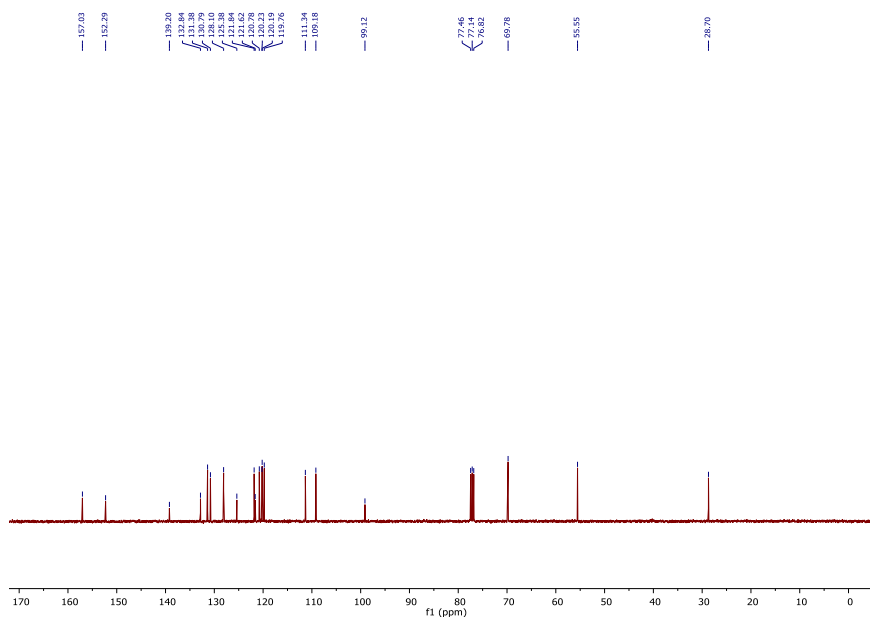 $^{13}\text{C}$  NMR (100 MHz,  $\text{CDCl}_3$ ) of compound **6a**

## Display Report

## Analysis Info

Analysis Name D:\Data\NEW USER DATA 2017\2018\APRIL 2018\5 Aril\Dr.A.Bisai-AB-KNB-05-079.d  
Method tune mix\_low.New.021117.m  
Sample Name AB-KNB-05-079  
Comment

Acquisition Date 4/5/2018 11:45:46 AM

Operator RUCHI

Instrument micrOTOF-Q II 10330

## Acquisition Parameter

|             |            |                       |           |                  |           |
|-------------|------------|-----------------------|-----------|------------------|-----------|
| Source Type | ESI        | Ion Polarity          | Positive  | Set Nebulizer    | 0.4 Bar   |
| Focus       | Not active | Set Capillary         | 4600 V    | Set Dry Heater   | 180 °C    |
| Scan Begin  | 50 m/z     | Set End Plate Offset  | -500 V    | Set Dry Gas      | 4.0 l/min |
| Scan End    | 3000 m/z   | Set Collision Cell RF | 100.0 Vpp | Set Divert Valve | Waste     |

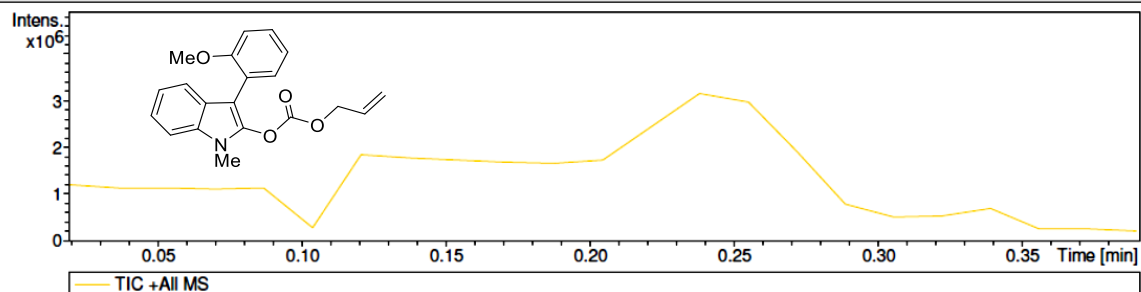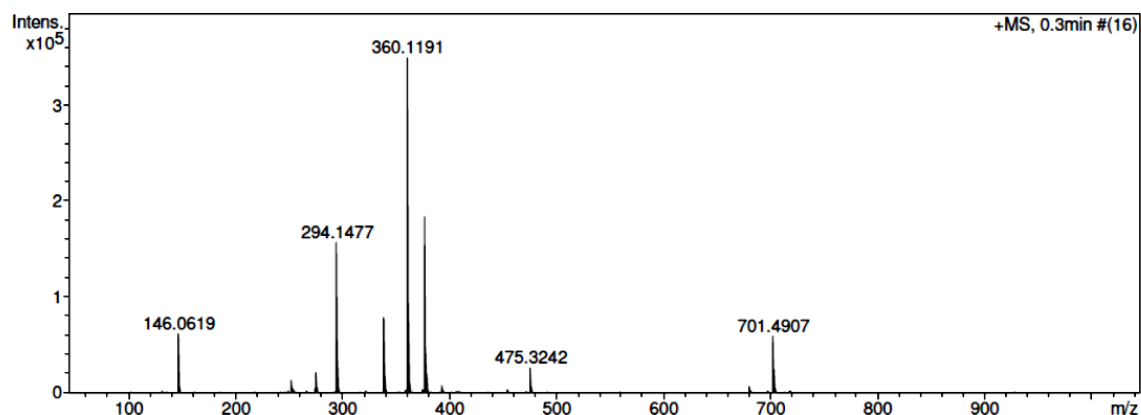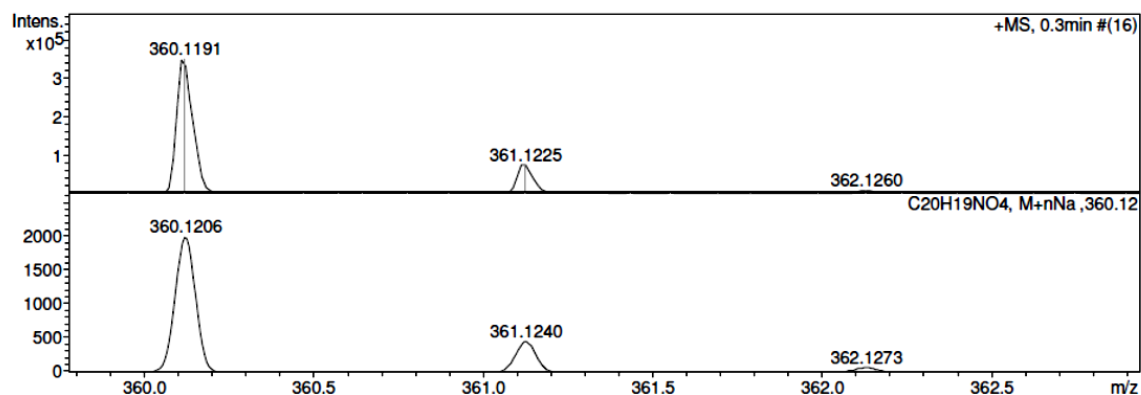



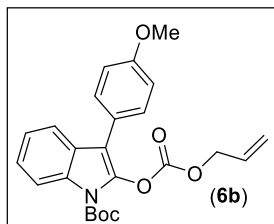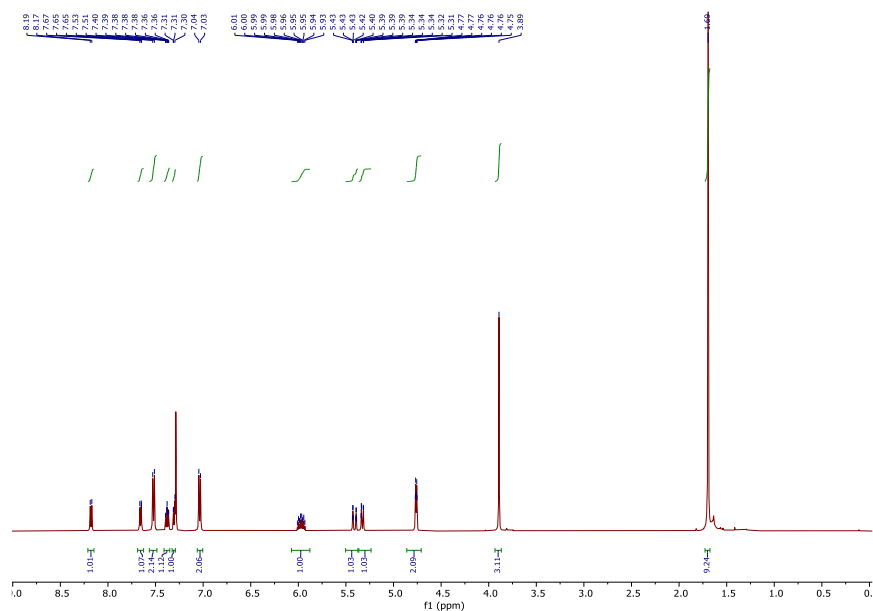

$^1\text{H}$  NMR (500 MHz,  $\text{CDCl}_3$ ) of compound **6b**

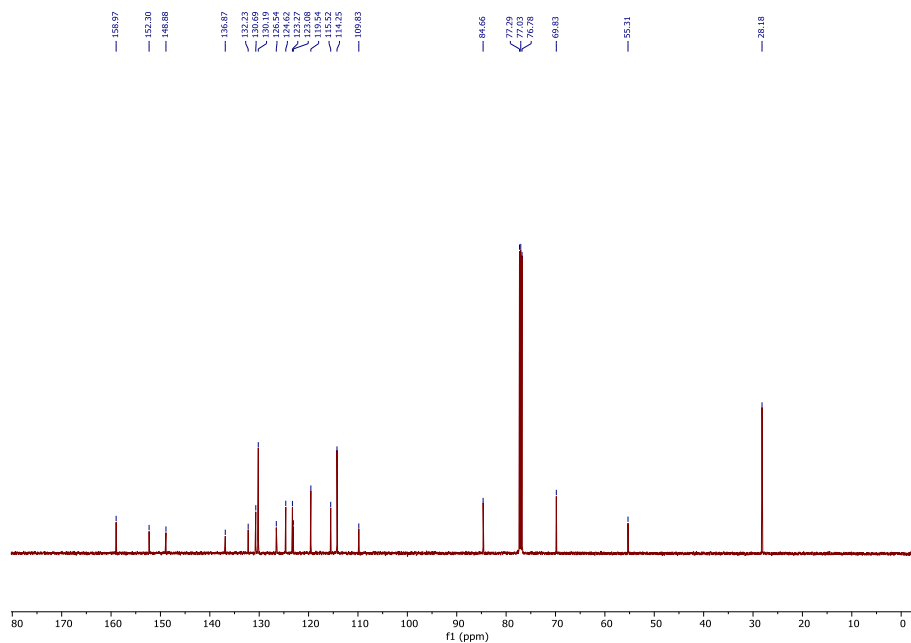

$^{13}\text{C}$  NMR (125 MHz,  $\text{CDCl}_3$ ) of compound **6b**

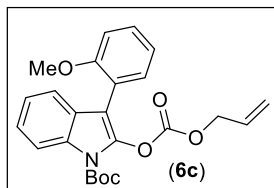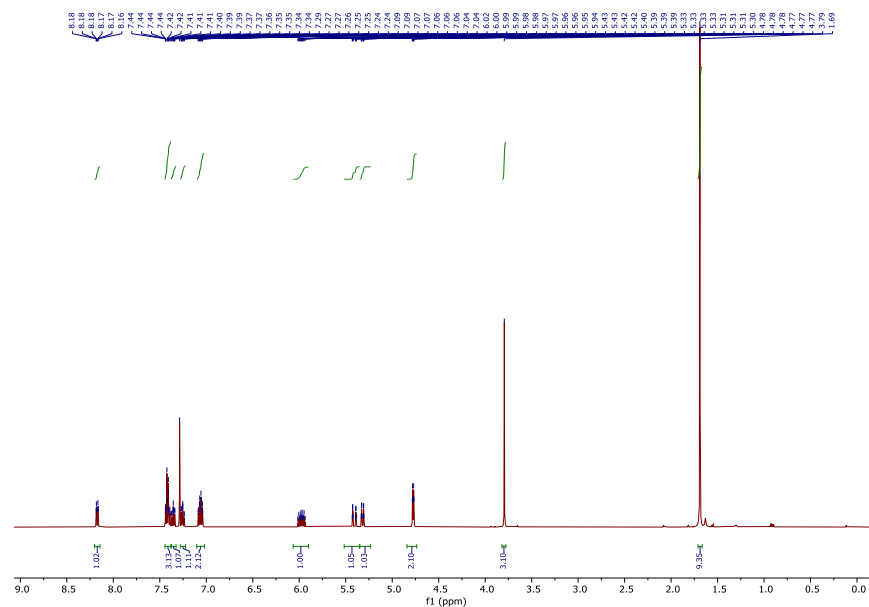 $^1\text{H}$  NMR (500 MHz,  $\text{CDCl}_3$ ) of compound **6c**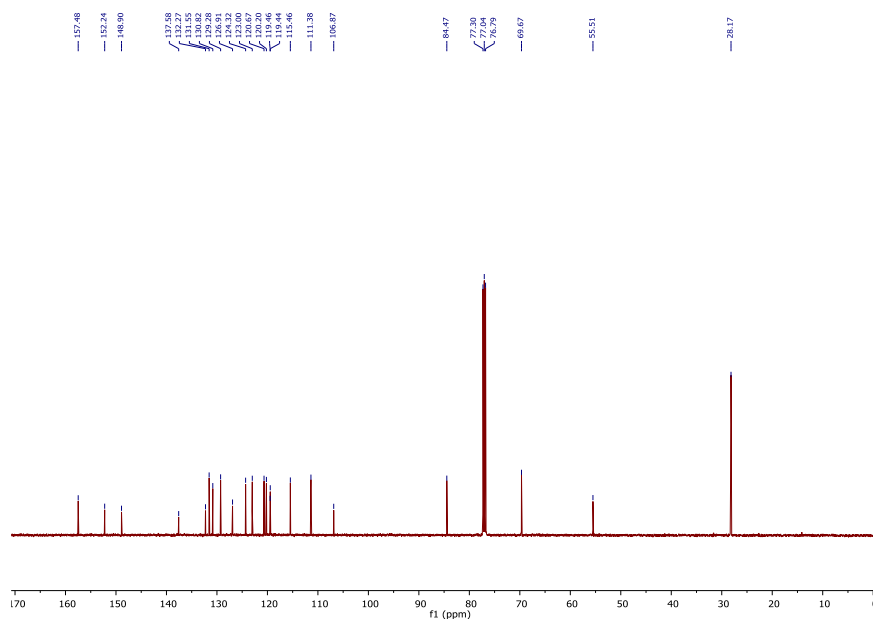 $^{13}\text{C}$  NMR (125 MHz,  $\text{CDCl}_3$ ) of compound **6c**

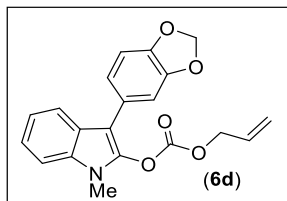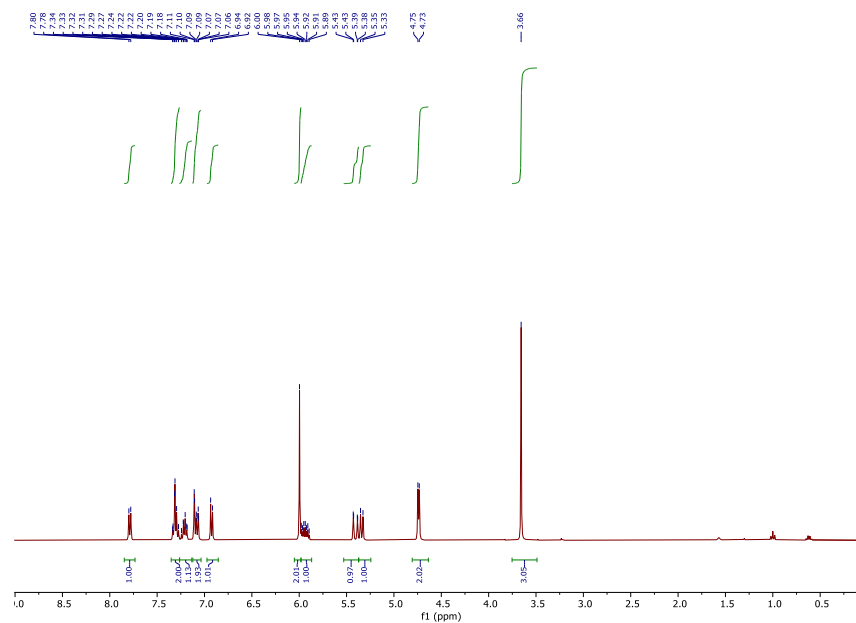

<sup>1</sup>H NMR (400 MHz, CDCl<sub>3</sub>) of compound **6d**

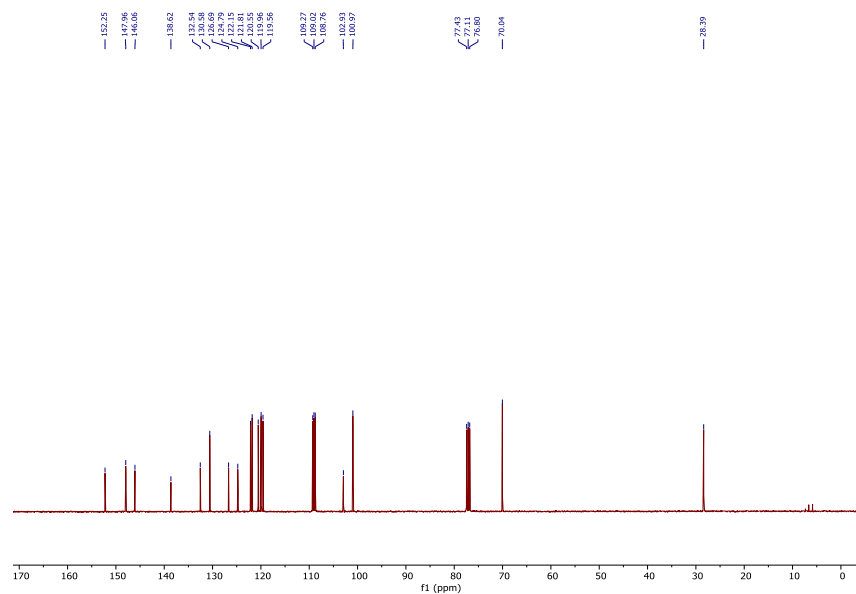

<sup>13</sup>C NMR (100 MHz, CDCl<sub>3</sub>) of compound **6d**

## Display Report

## Analysis Info

Analysis Name D:\Data\NEW USER DATA 2017\2018\APRIL 2018\5 Ari\Dr.A.Bisai-AB-KNB-04-104.d  
Method tune\_mix\_low.New.021117.m  
Sample Name AB-KNB-04-104  
Comment

Acquisition Date 4/5/2018 11:43:45 AM  
Operator RUCHI  
Instrument micrOTOF-Q II 10330

## Acquisition Parameter

|             |            |                       |           |                  |           |
|-------------|------------|-----------------------|-----------|------------------|-----------|
| Source Type | ESI        | Ion Polarity          | Positive  | Set Nebulizer    | 0.4 Bar   |
| Focus       | Not active | Set Capillary         | 4600 V    | Set Dry Heater   | 180 °C    |
| Scan Begin  | 50 m/z     | Set End Plate Offset  | -500 V    | Set Dry Gas      | 4.0 l/min |
| Scan End    | 3000 m/z   | Set Collision Cell RF | 100.0 Vpp | Set Divert Valve | Waste     |

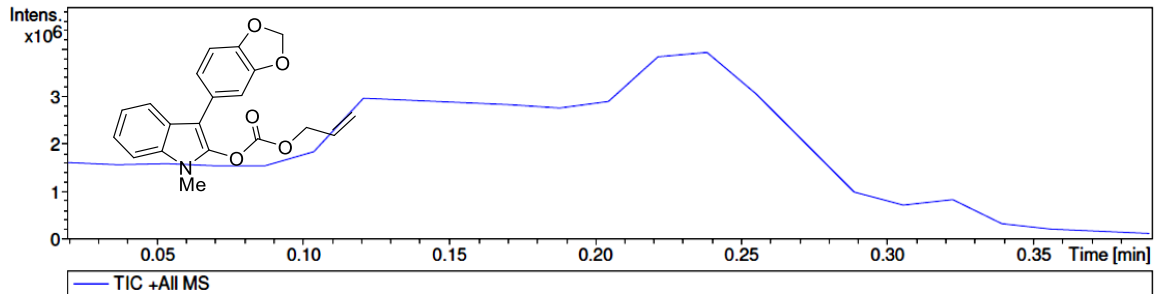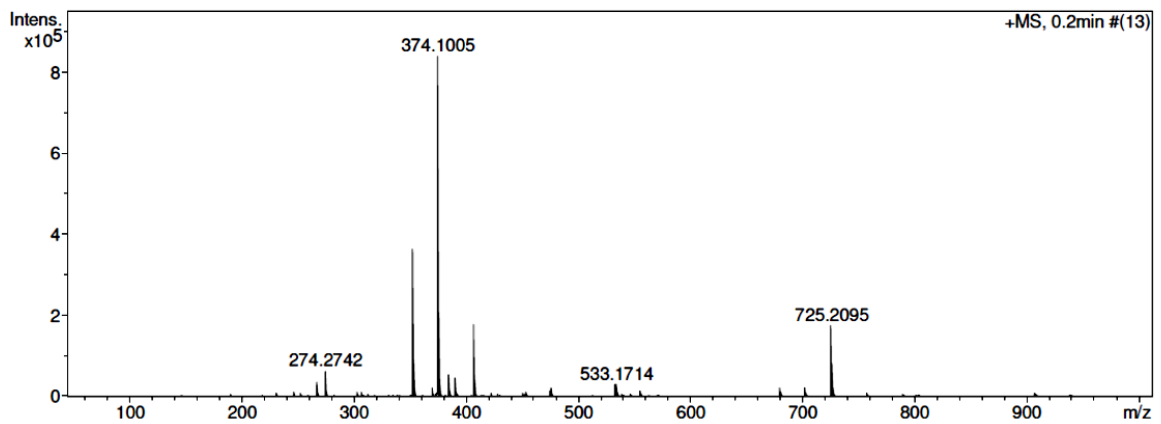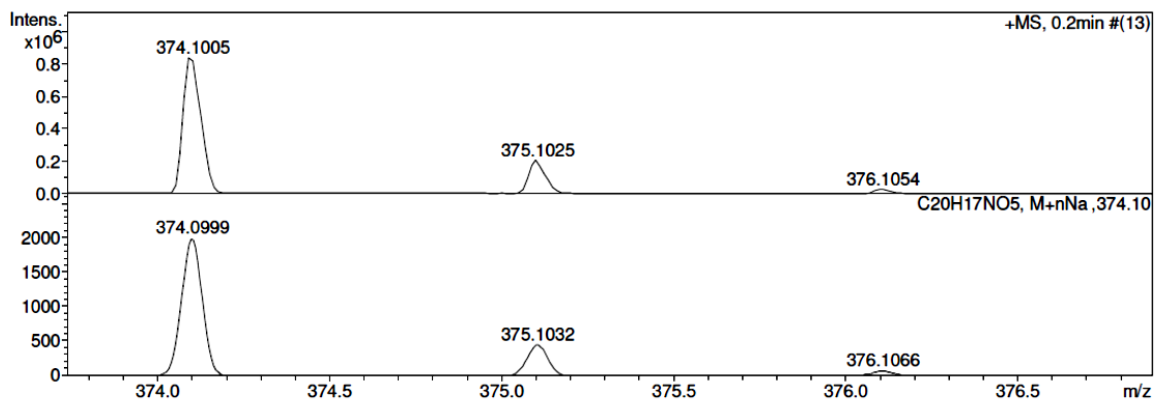

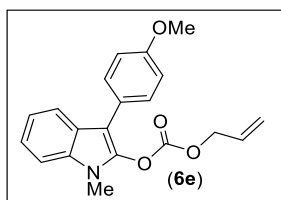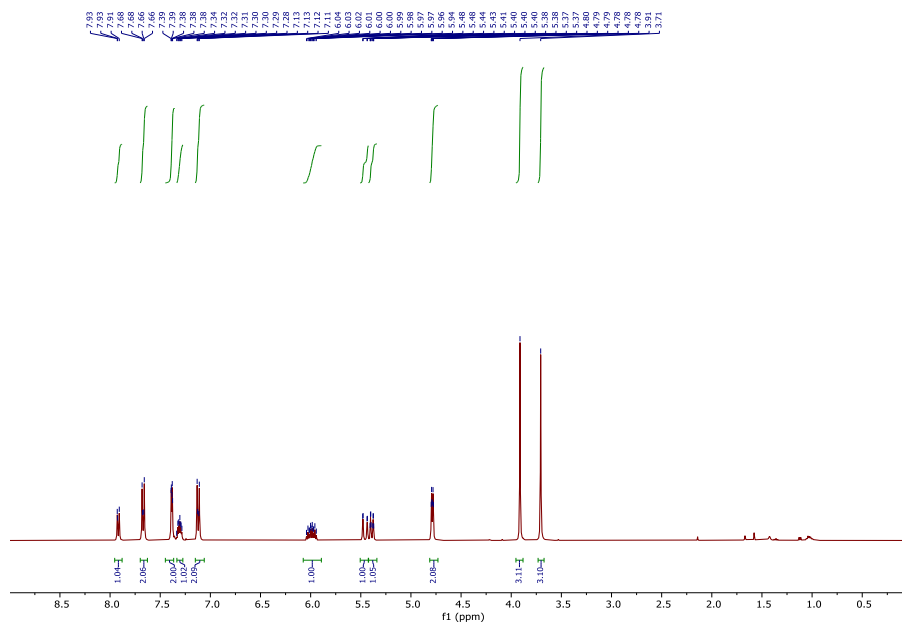

$^1\text{H}$  NMR (400 MHz,  $\text{CDCl}_3$ ) of compound **6e**

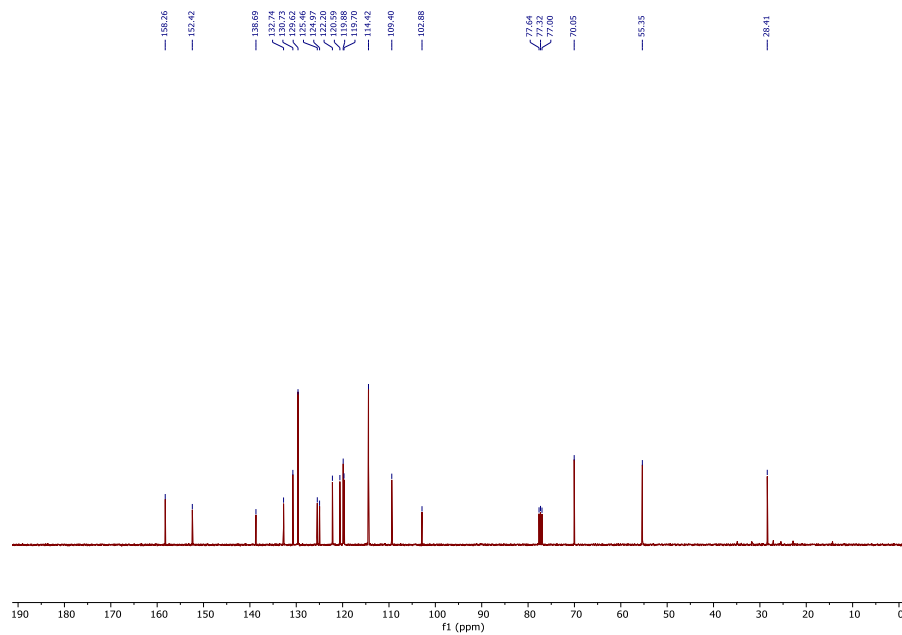

$^{13}\text{C}$  NMR (100 MHz,  $\text{CDCl}_3$ ) of compound **6e**

## Display Report

## Analysis Info

Analysis Name D:\Data\NEW USER DATA 2017\2018\May-2018\07-05-2018\Dr A Bisai-KNB-04-089\_1-C,7\_01\_1601.d  
Method hrlcms-20 sept.m  
Sample Name Dr A Bisai-KNB-04-089  
Comment

Acquisition Date 5/7/2018 12:52:34 PM  
Operator RUCHI  
Instrument micrOTOF-Q II 10330

## Acquisition Parameter

|             |          |                       |           |                  |           |
|-------------|----------|-----------------------|-----------|------------------|-----------|
| Source Type | ESI      | Ion Polarity          | Positive  | Set Nebulizer    | 1.2 Bar   |
| Focus       | Active   | Set Capillary         | 4500 V    | Set Dry Heater   | 200 °C    |
| Scan Begin  | 50 m/z   | Set End Plate Offset  | -500 V    | Set Dry Gas      | 7.0 l/min |
| Scan End    | 3000 m/z | Set Collision Cell RF | 130.0 Vpp | Set Divert Valve | Waste     |

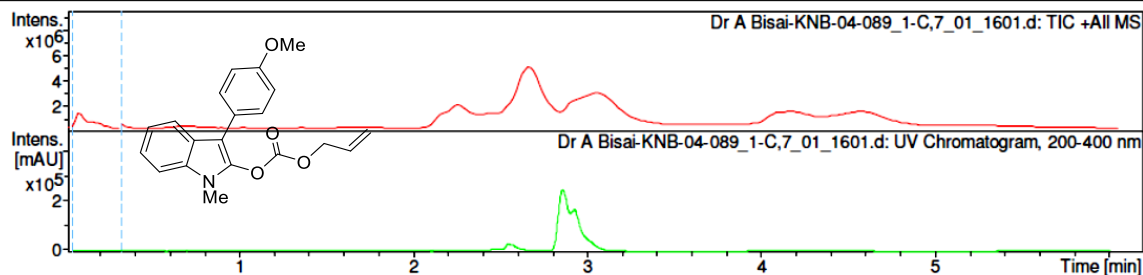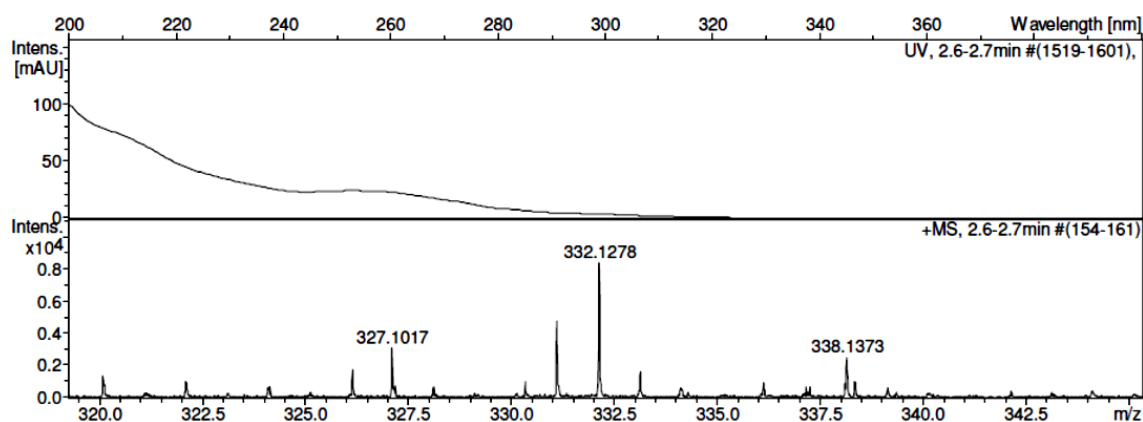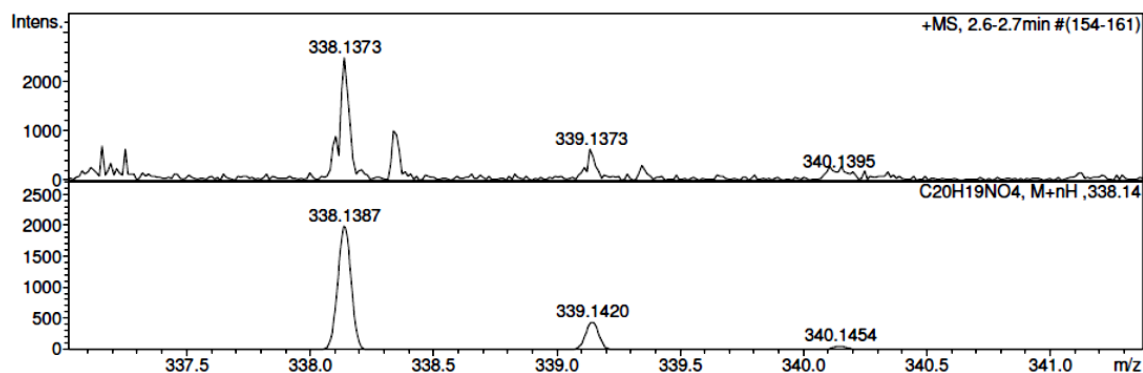

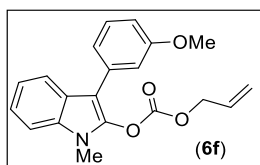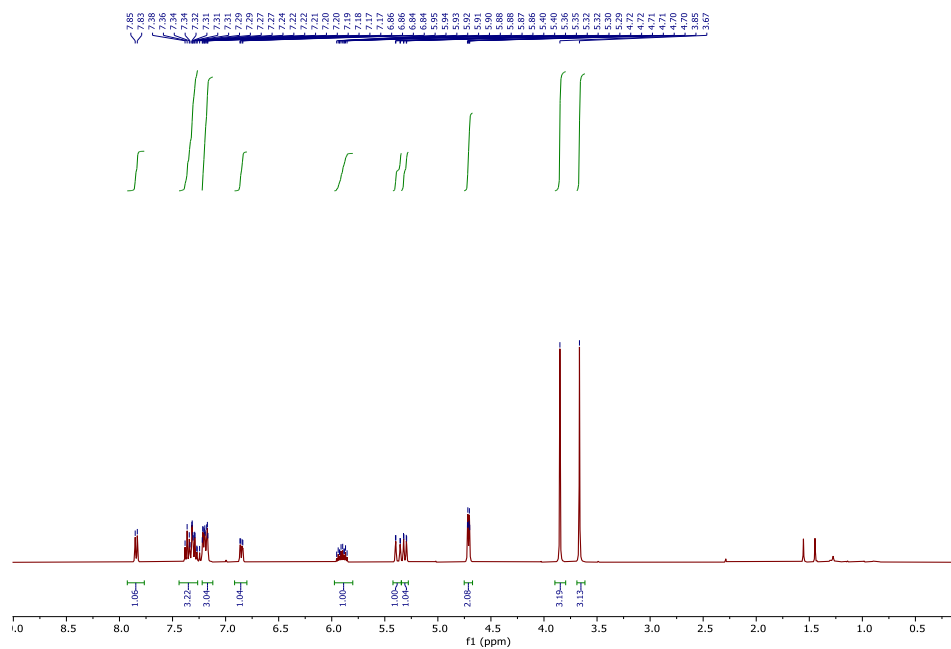

## Display Report

|                      |                                                                                           |                  |                       |
|----------------------|-------------------------------------------------------------------------------------------|------------------|-----------------------|
| <b>Analysis Info</b> |                                                                                           | Acquisition Date | 10/8/2018 12:54:20 PM |
| Analysis Name        | D:\Data\NEW USER DATA 2017\2018\OCTOBER 2018\08 oct\Dr A Bisai-KNB-04-105_1-B,8_01_3721.d | Operator         | RUCHI                 |
| Method               | hrlcms-20 sept.m                                                                          | Instrument       | micrOTOF-Q II 10330   |
| Sample Name          | Dr A Bisai-KNB-04-105                                                                     |                  |                       |
| Comment              |                                                                                           |                  |                       |

**Acquisition Parameter**

|             |          |                       |           |                  |           |
|-------------|----------|-----------------------|-----------|------------------|-----------|
| Source Type | ESI      | Ion Polarity          | Positive  | Set Nebulizer    | 1.2 Bar   |
| Focus       | Active   | Set Capillary         | 4500 V    | Set Dry Heater   | 200 °C    |
| Scan Begin  | 50 m/z   | Set End Plate Offset  | -500 V    | Set Dry Gas      | 7.0 l/min |
| Scan End    | 3000 m/z | Set Collision Cell RF | 130.0 Vpp | Set Divert Valve | Waste     |

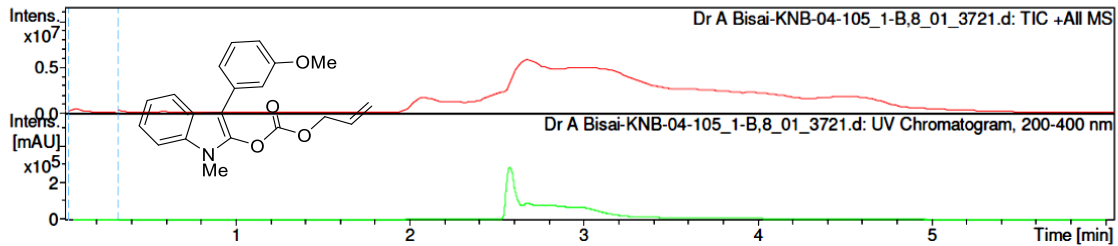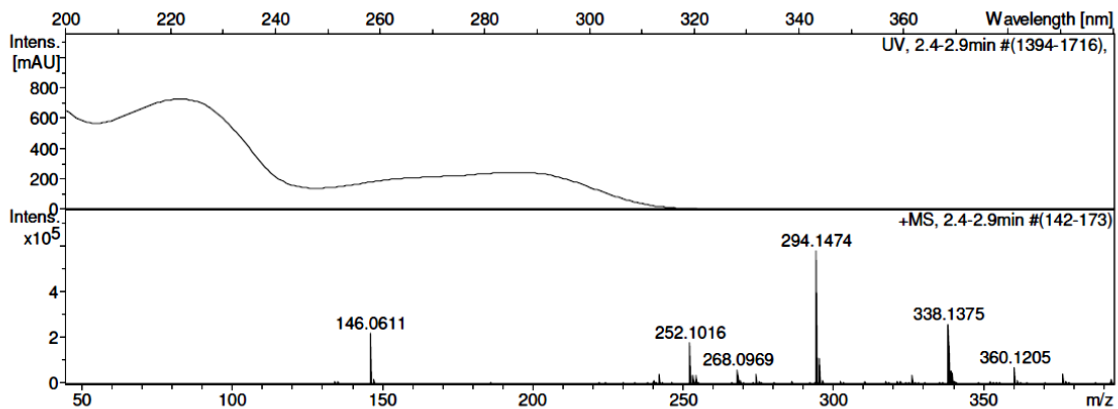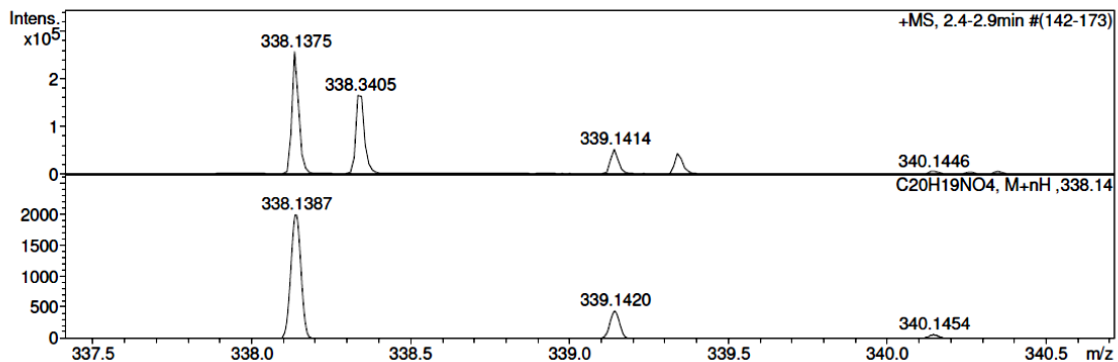



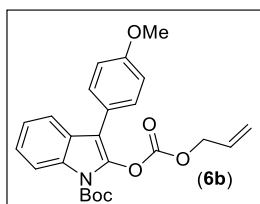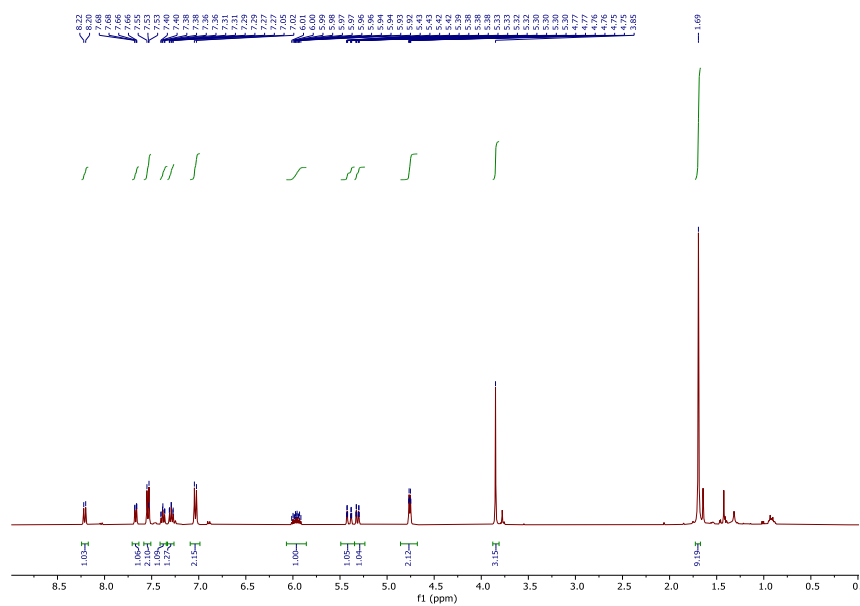

$^1\text{H NMR}$  (400 MHz,  $\text{CDCl}_3$ ) of compound **6b**

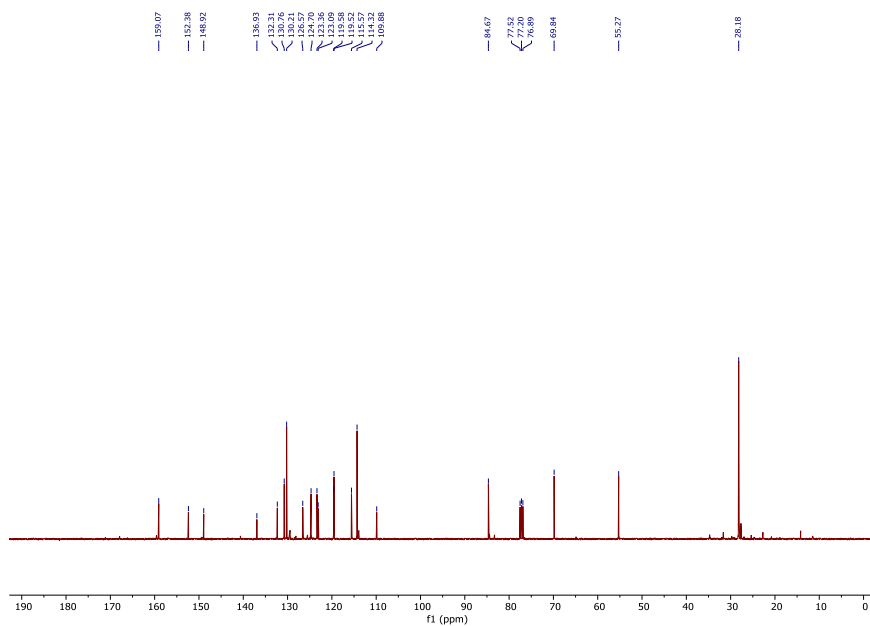

$^{13}\text{C NMR}$  (100 MHz,  $\text{CDCl}_3$ ) of compound **6b**

## Display Report

## Analysis Info

Analysis Name D:\Data\NEW USER DATA 2017\2018\May-2018\22-05-2018\Dr A Bisai-KNB-04-108-SM\_1-E,4\_01\_1953.d  
Method hrlcms-20 sept.m  
Sample Name Dr A Bisai-KNB-04-108-SM  
Comment

Acquisition Date 5/22/2018 12:17:36 PM  
Operator RUCHI  
Instrument micrOTOF-Q II 10330

## Acquisition Parameter

|             |          |                       |           |                  |           |
|-------------|----------|-----------------------|-----------|------------------|-----------|
| Source Type | ESI      | Ion Polarity          | Positive  | Set Nebulizer    | 1.2 Bar   |
| Focus       | Active   | Set Capillary         | 4500 V    | Set Dry Heater   | 200 °C    |
| Scan Begin  | 50 m/z   | Set End Plate Offset  | -500 V    | Set Dry Gas      | 7.0 l/min |
| Scan End    | 3000 m/z | Set Collision Cell RF | 130.0 Vpp | Set Divert Valve | Waste     |

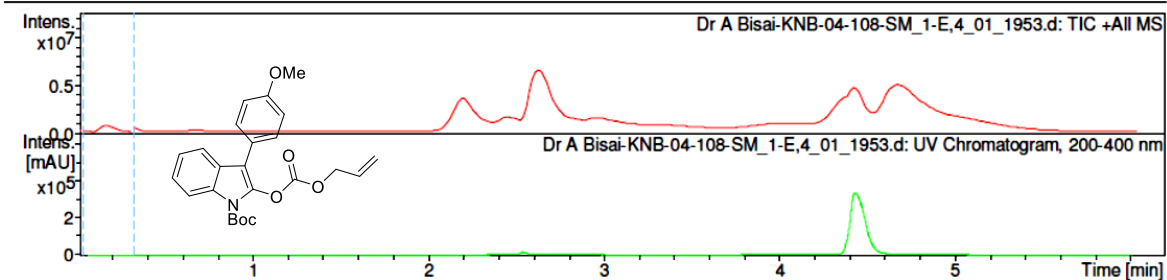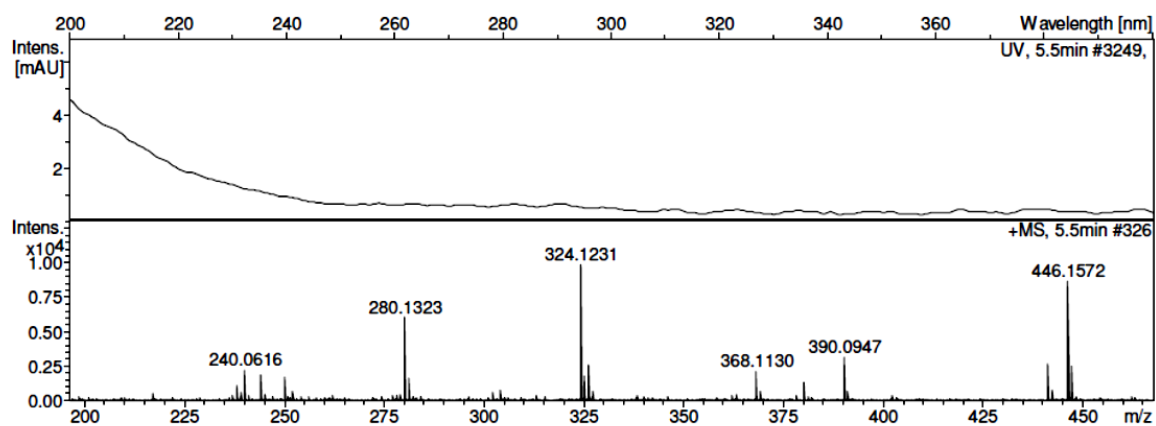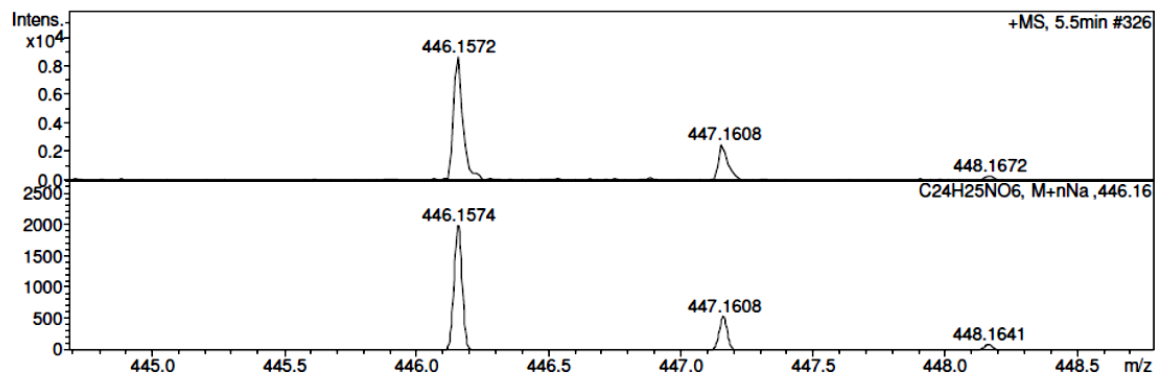

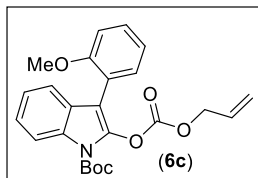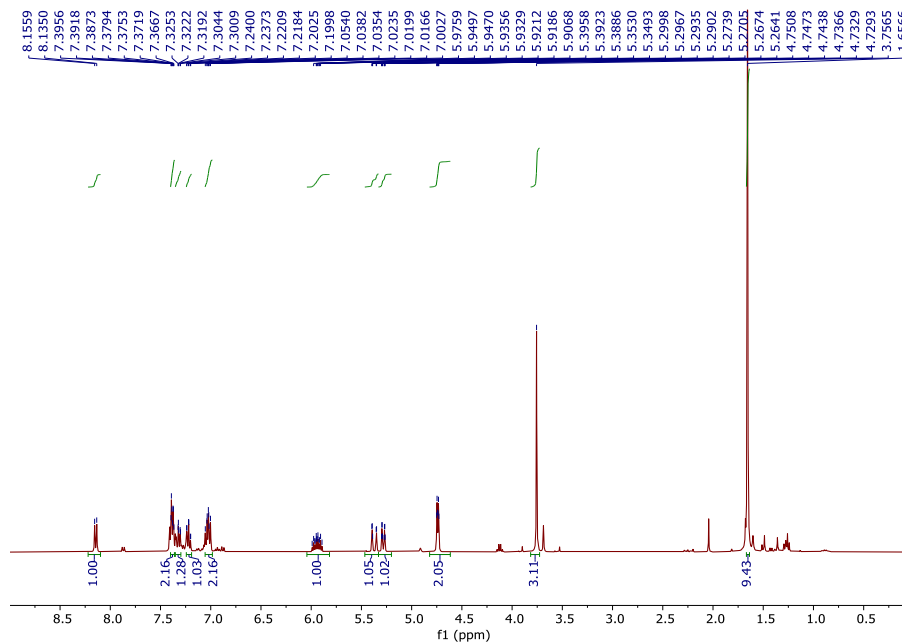<sup>1</sup>H NMR (400 MHz, CDCl<sub>3</sub>) of compound **6c**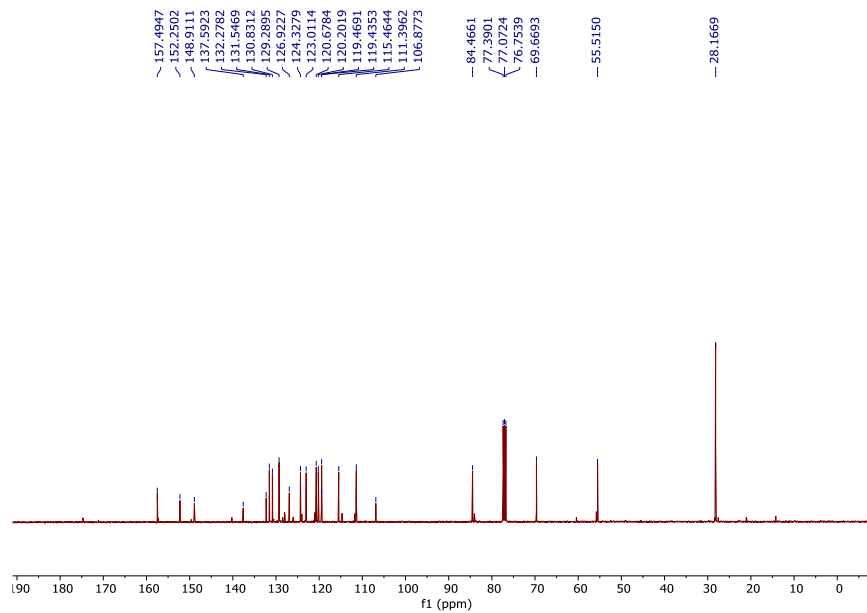<sup>13</sup>C NMR (100 MHz, CDCl<sub>3</sub>) of compound **6c**

## Display Report

|                      |                                                                                            |                  |                       |
|----------------------|--------------------------------------------------------------------------------------------|------------------|-----------------------|
| <b>Analysis Info</b> |                                                                                            | Acquisition Date | 5/11/2018 12:14:30 PM |
| Analysis Name        | D:\Data\NEW USER DATA 2017\2018\May-2018\11-05-2018\Dr A Bisai-KNB0-03-195_1-B,6_01_1721.d | Operator         | RUCHI                 |
| Method               | hrlcms-20 sept.m                                                                           | Instrument       | micrOTOF-Q II 10330   |
| Sample Name          | Dr A Bisai-KNB0-03-195                                                                     |                  |                       |
| Comment              |                                                                                            |                  |                       |

## Acquisition Parameter

|             |          |                       |           |                  |           |
|-------------|----------|-----------------------|-----------|------------------|-----------|
| Source Type | ESI      | Ion Polarity          | Positive  | Set Nebulizer    | 1.2 Bar   |
| Focus       | Active   | Set Capillary         | 4500 V    | Set Dry Heater   | 200 °C    |
| Scan Begin  | 50 m/z   | Set End Plate Offset  | -500 V    | Set Dry Gas      | 7.0 l/min |
| Scan End    | 3000 m/z | Set Collision Cell RF | 130.0 Vpp | Set Divert Valve | Waste     |

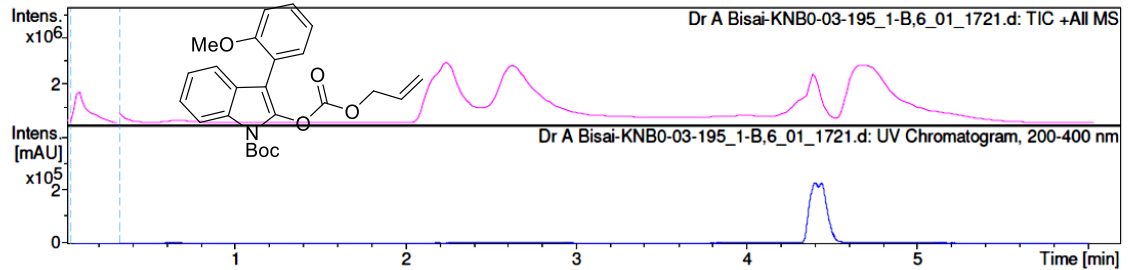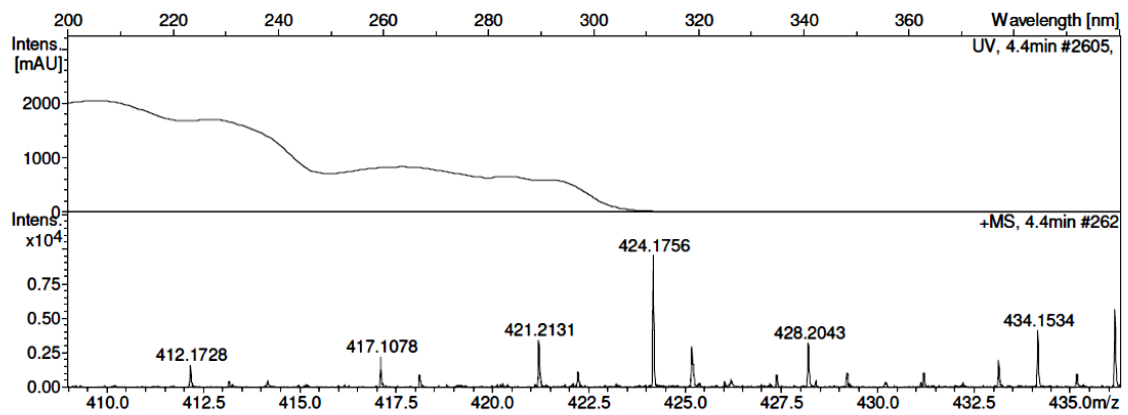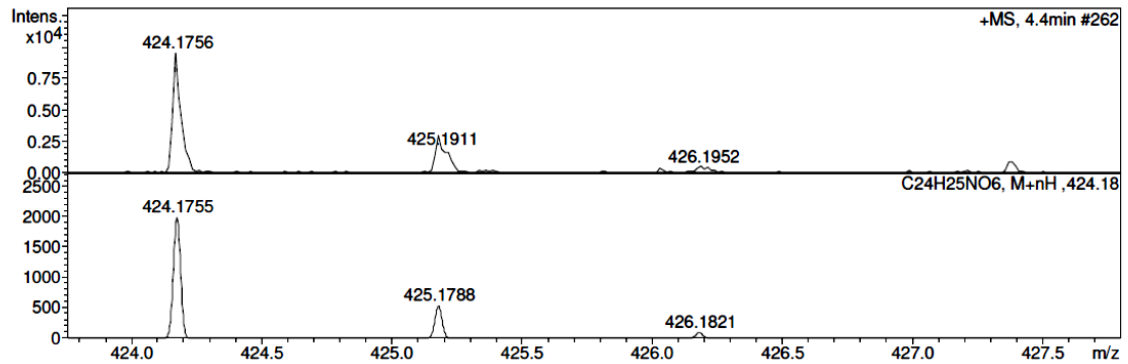Scanned copy of mass spectrum of **6c**

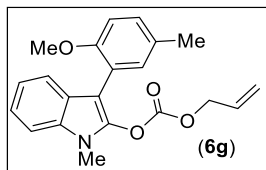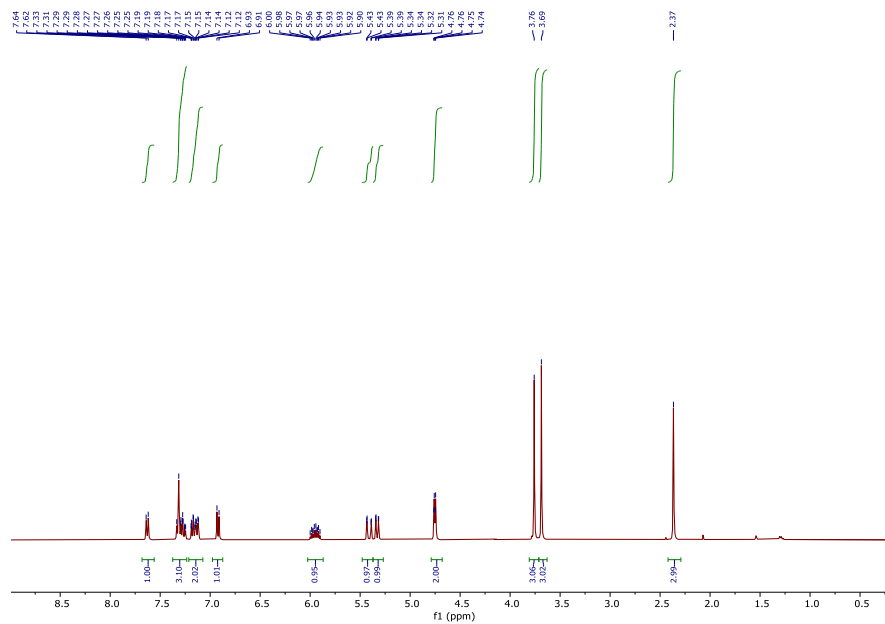

$^1\text{H NMR}$  (400 MHz,  $\text{CDCl}_3$ ) of compound **6g**

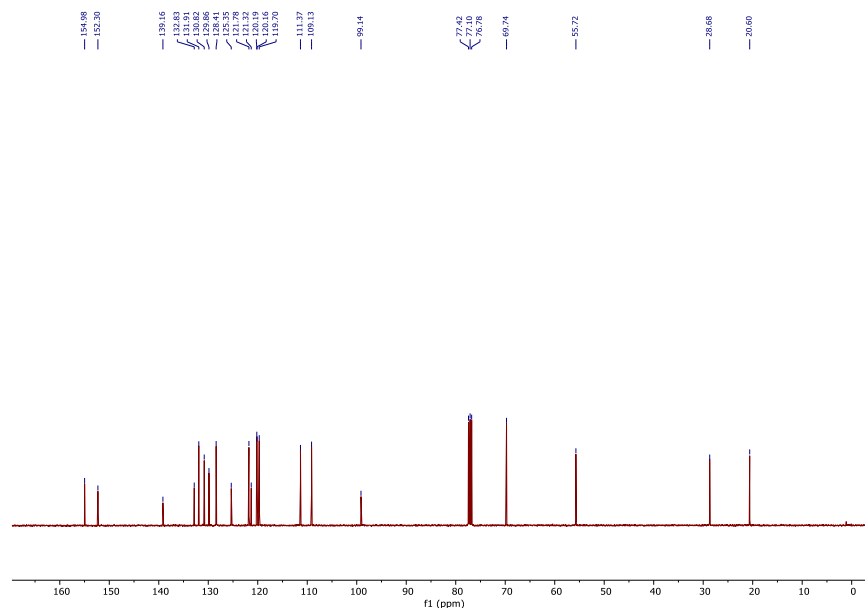

$^{13}\text{C NMR}$  (100 MHz,  $\text{CDCl}_3$ ) of compound **6g**

## Display Report

**Analysis Info**  
Analysis Name D:\Data\NEW USER DATA 2017\2018\May-2018\08-05-2018\Dr A Bisai-KNB-04-027\_1-A,4\_01\_1621.d  
Method hrlcms-20 sept.m  
Sample Name Dr A Bisai-KNB-04-027  
Comment

Acquisition Date 5/8/2018 11:36:01 AM  
Operator RUCHI  
Instrument micrOTOF-Q II 10330

**Acquisition Parameter**

|             |          |                       |           |                  |           |
|-------------|----------|-----------------------|-----------|------------------|-----------|
| Source Type | ESI      | Ion Polarity          | Positive  | Set Nebulizer    | 1.2 Bar   |
| Focus       | Active   | Set Capillary         | 4500 V    | Set Dry Heater   | 200 °C    |
| Scan Begin  | 50 m/z   | Set End Plate Offset  | -500 V    | Set Dry Gas      | 7.0 l/min |
| Scan End    | 3000 m/z | Set Collision Cell RF | 130.0 Vpp | Set Divert Valve | Waste     |

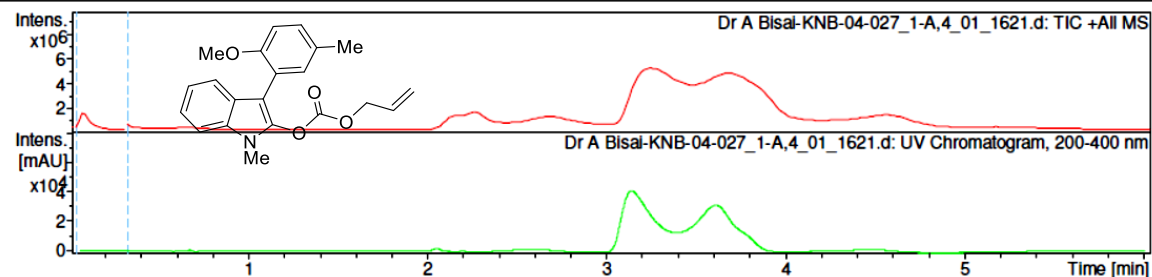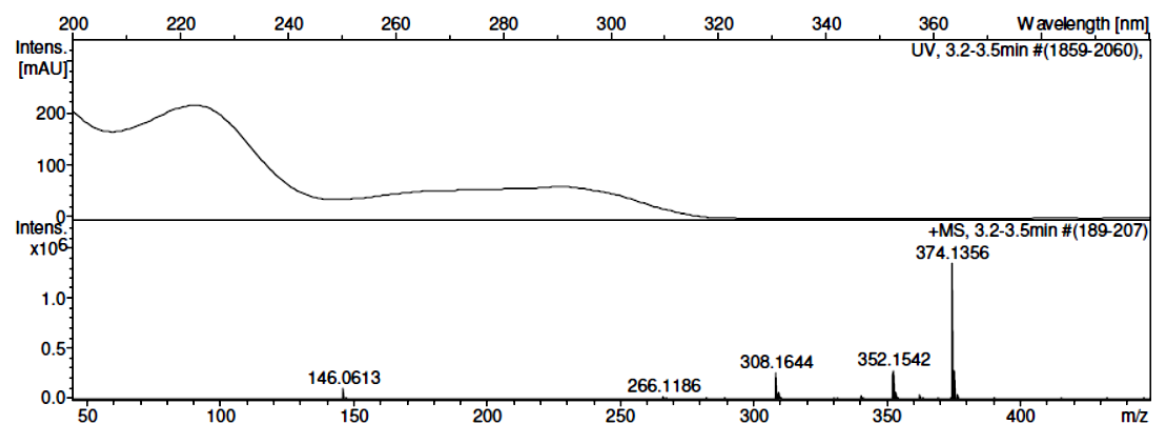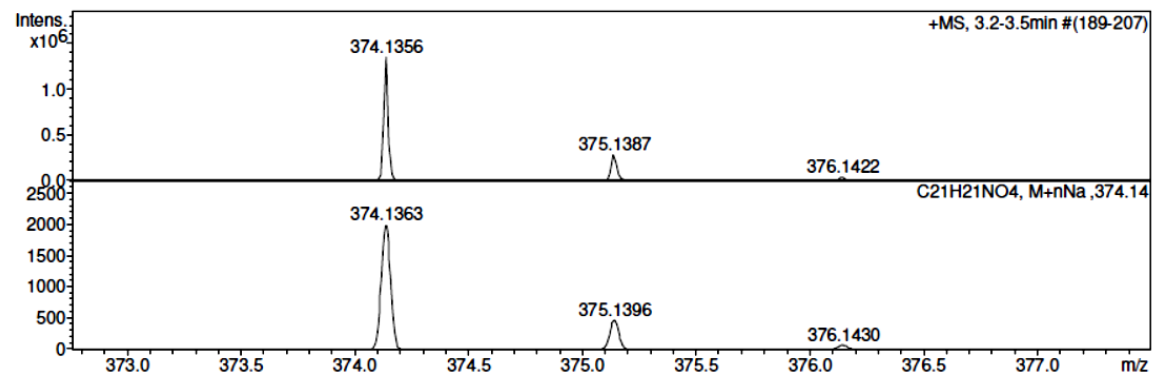Scanned copy of mass spectrum of **6g**

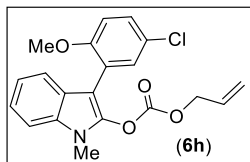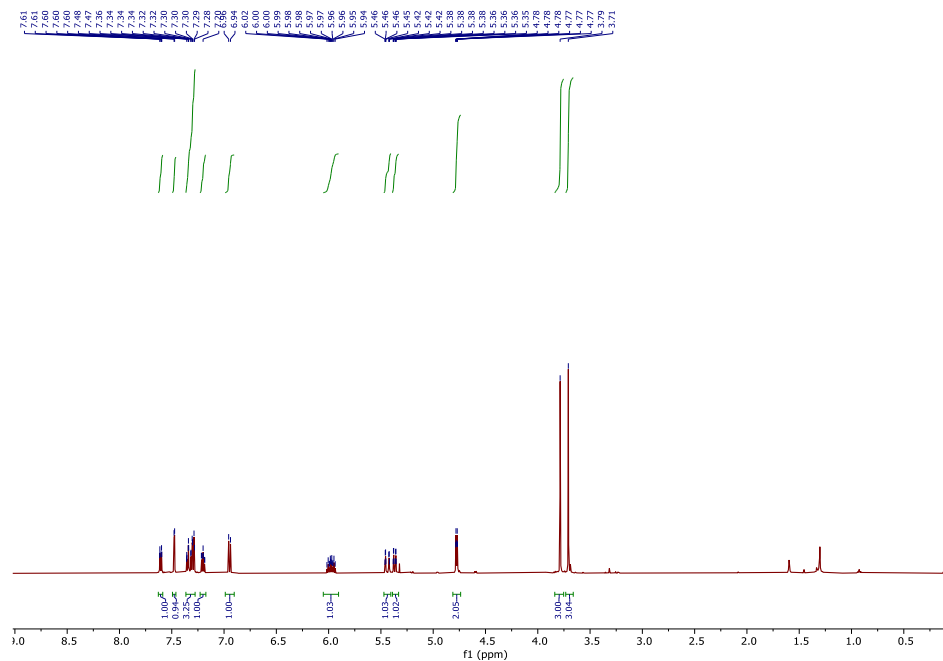

$^1\text{H}$  NMR (500 MHz,  $\text{CDCl}_3$ ) of compound **6h**

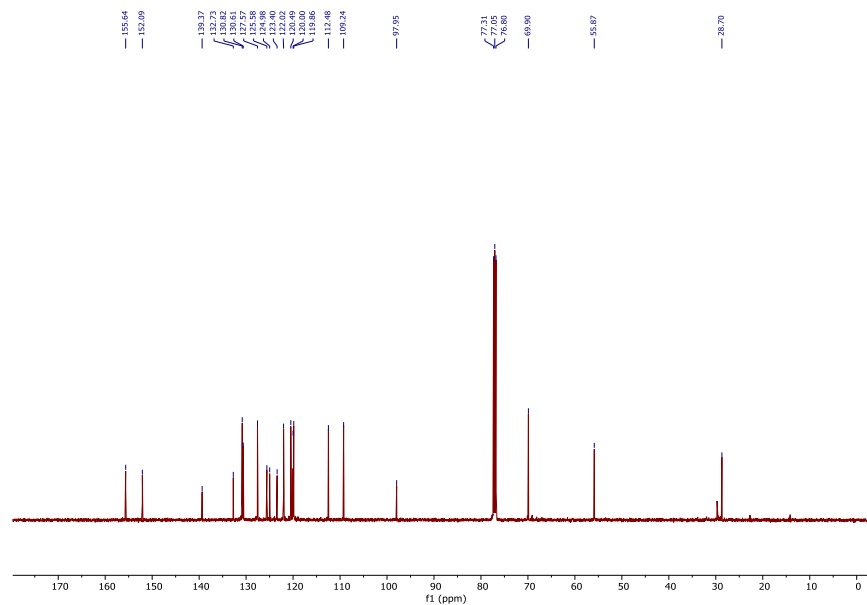

$^{13}\text{C}$  NMR (125 MHz,  $\text{CDCl}_3$ ) of compound **6h**

## Display Report

## Analysis Info

Analysis Name D:\Data\NEW USER DATA 2017\2018\May-2018\05-05-2018\Dr.A.Bisai-AB-KNB-03-049\_1-A,6\_01\_1576.d  
Method hrlcms-20 sept.m  
Sample Name Dr.A.Bisai-AB-KNB-03-049  
Comment

Acquisition Date 5/5/2018 10:55:09 AM

Operator RUCHI

Instrument micrOTOF-Q II 10330

## Acquisition Parameter

|             |          |                       |           |                  |           |
|-------------|----------|-----------------------|-----------|------------------|-----------|
| Source Type | ESI      | Ion Polarity          | Positive  | Set Nebulizer    | 1.2 Bar   |
| Focus       | Active   | Set Capillary         | 4500 V    | Set Dry Heater   | 200 °C    |
| Scan Begin  | 50 m/z   | Set End Plate Offset  | -500 V    | Set Dry Gas      | 7.0 l/min |
| Scan End    | 3000 m/z | Set Collision Cell RF | 130.0 Vpp | Set Divert Valve | Waste     |

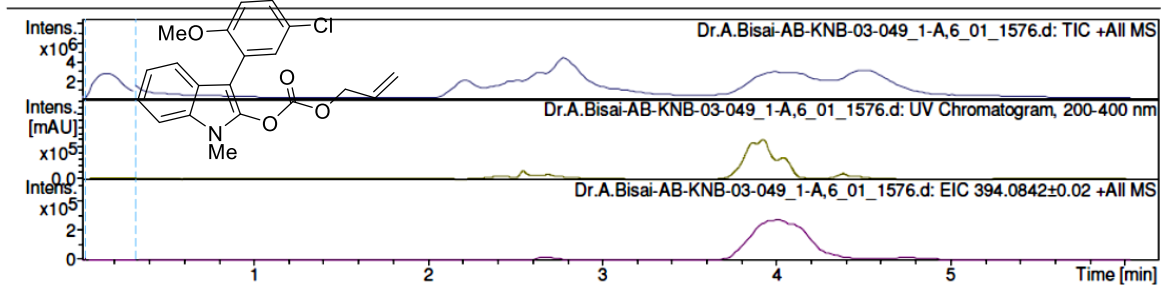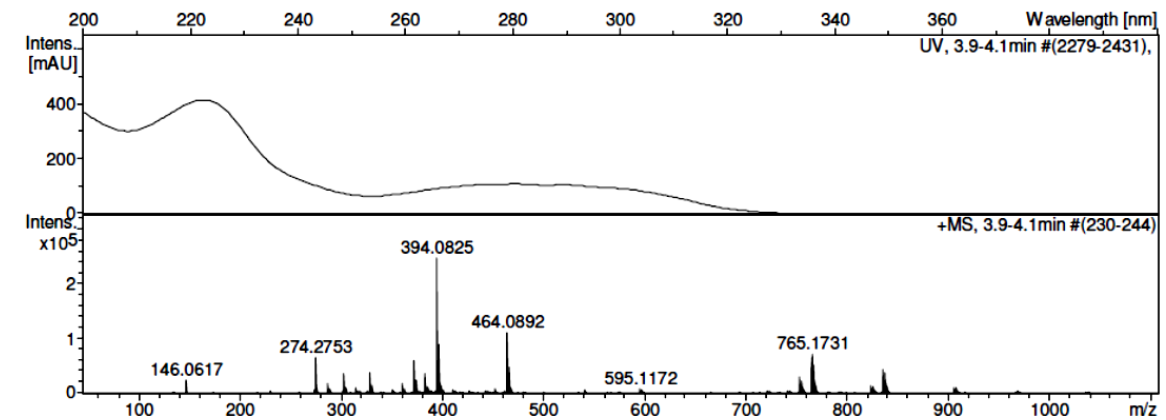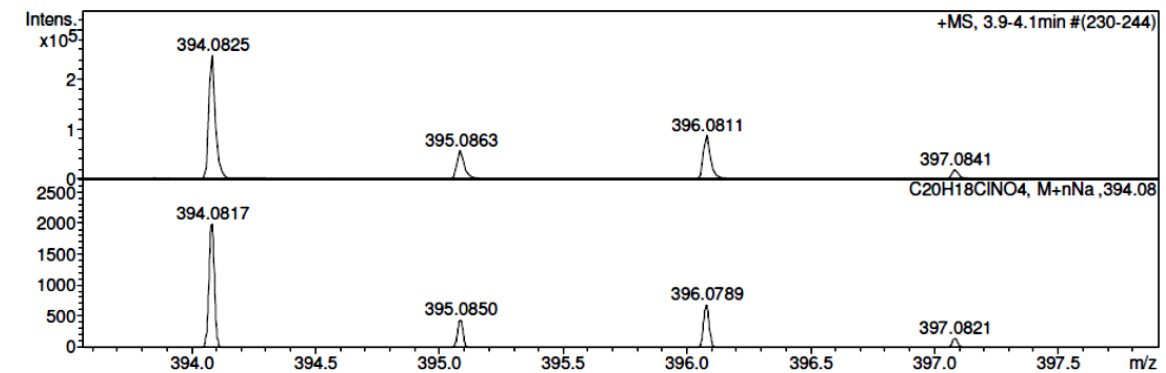



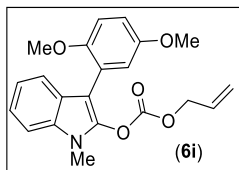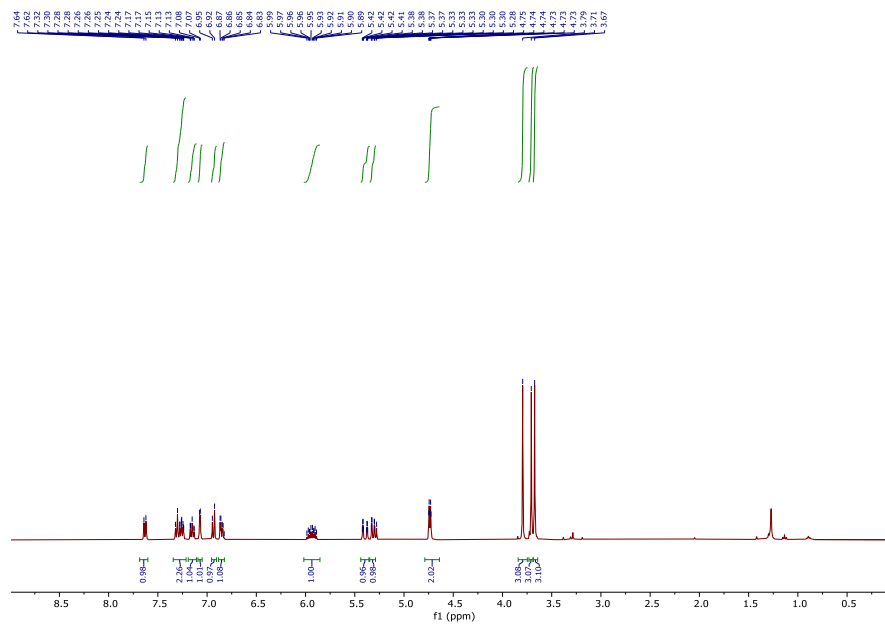

$^1\text{H}$  NMR (500 MHz,  $\text{CDCl}_3$ ) of compound **6i**

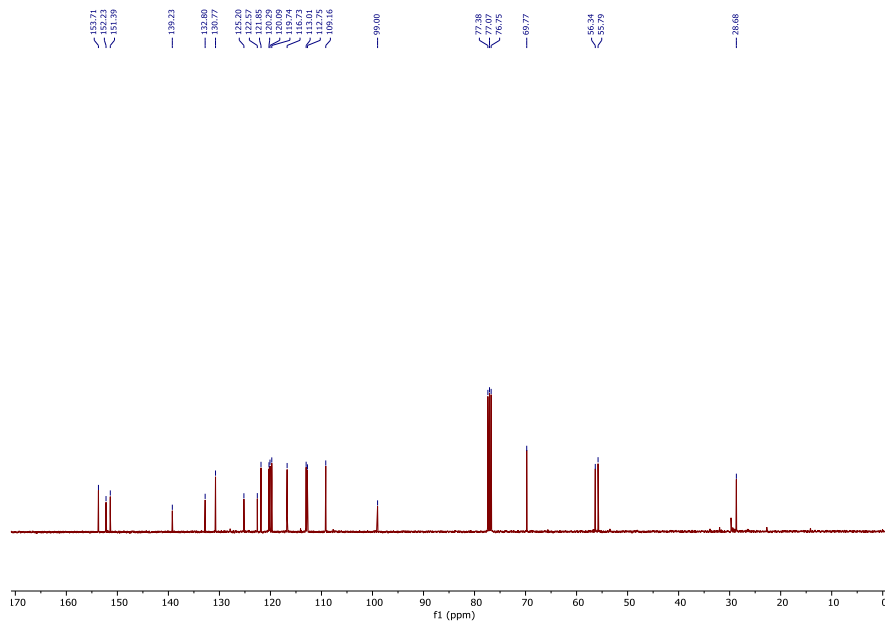

$^{13}\text{C}$  NMR (125 MHz,  $\text{CDCl}_3$ ) of compound **6i**

## Display Report

## Analysis Info

Analysis Name D:\Data\NEW USER DATA 2017\2018\APRIL 2018\6Apr\Dr.A.Bisai-AB-KNB-04-46.d  
Method tune mix\_low.New.021117.m  
Sample Name AB-KNB-05-46  
Comment

Acquisition Date 4/6/2018 3:40:34 PM  
Operator RUCHI  
Instrument micrOTOF-Q II 10330

## Acquisition Parameter

|             |            |                       |           |                  |           |
|-------------|------------|-----------------------|-----------|------------------|-----------|
| Source Type | ESI        | Ion Polarity          | Positive  | Set Nebulizer    | 0.4 Bar   |
| Focus       | Not active | Set Capillary         | 4600 V    | Set Dry Heater   | 180 °C    |
| Scan Begin  | 50 m/z     | Set End Plate Offset  | -500 V    | Set Dry Gas      | 4.0 l/min |
| Scan End    | 3000 m/z   | Set Collision Cell RF | 100.0 Vpp | Set Divert Valve | Waste     |

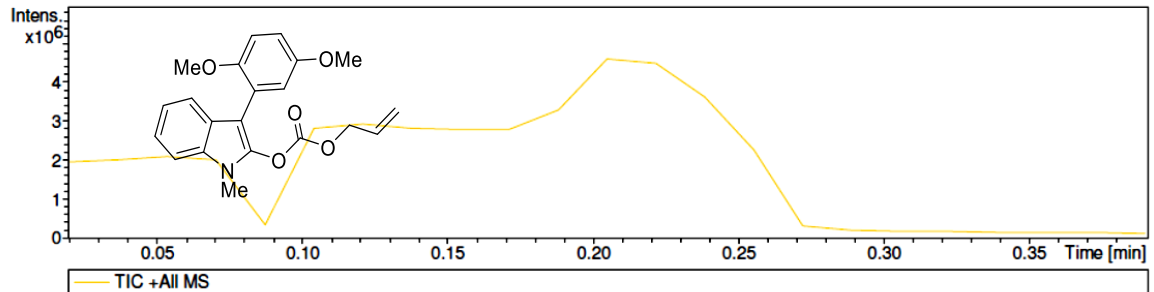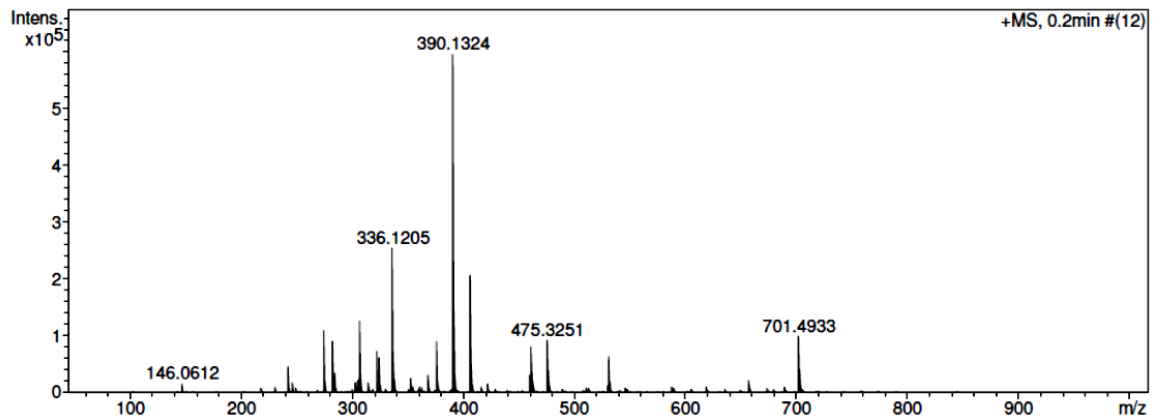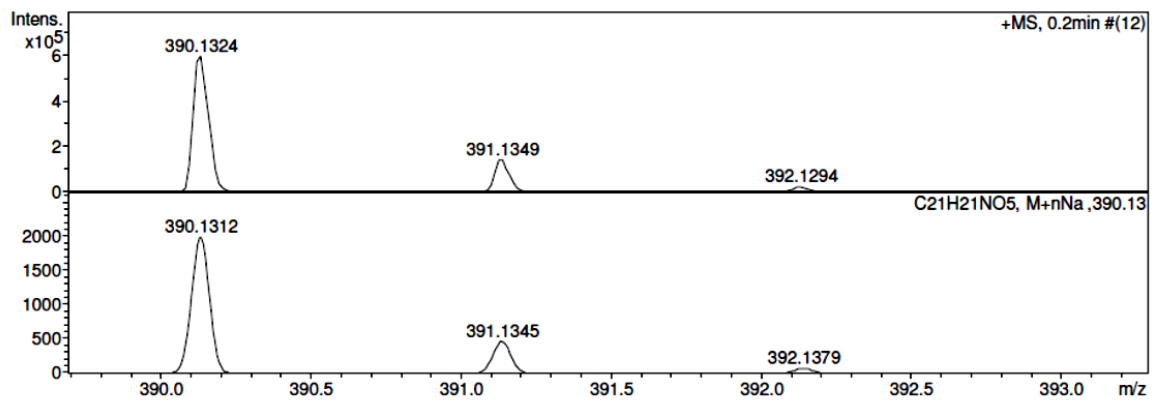

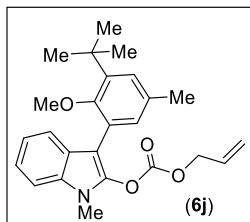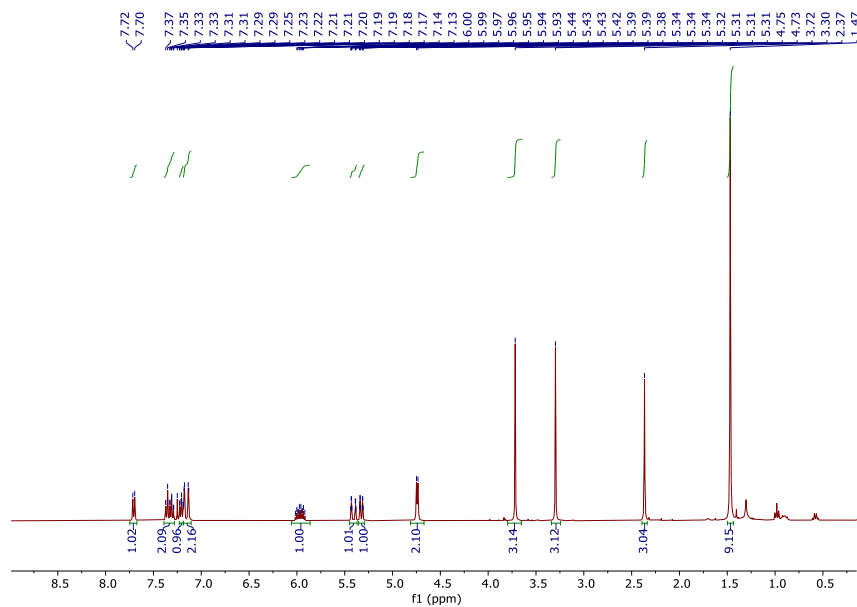

<sup>1</sup>H NMR (500 MHz, CDCl<sub>3</sub>) of compound **6j**

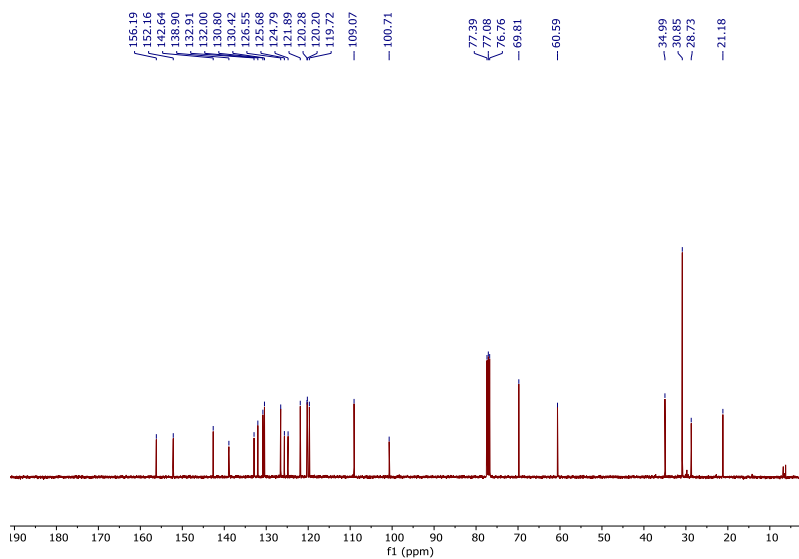

<sup>13</sup>C NMR (125 MHz, CDCl<sub>3</sub>) of compound **6j**

## Display Report

## Analysis Info

Analysis Name D:\Data\NEW USER DATA 2017\2018\JUNE 2018\01 JUNE\Dr.A.Bisai-AB-KNB-04-164-R2-1.d  
 Method tune\_low.m  
 Sample Name AB-KNB-04-164-R2-1  
 Comment

Acquisition Date 6/1/2018 4:23:26 PM  
 Operator RUCHI  
 Instrument micrOTOF-Q II 10330

## Acquisition Parameter

|             |            |                       |           |                  |           |
|-------------|------------|-----------------------|-----------|------------------|-----------|
| Source Type | ESI        | Ion Polarity          | Positive  | Set Nebulizer    | 0.4 Bar   |
| Focus       | Not active | Set Capillary         | 4600 V    | Set Dry Heater   | 180 °C    |
| Scan Begin  | 50 m/z     | Set End Plate Offset  | -500 V    | Set Dry Gas      | 4.0 l/min |
| Scan End    | 3000 m/z   | Set Collision Cell RF | 100.0 Vpp | Set Divert Valve | Waste     |

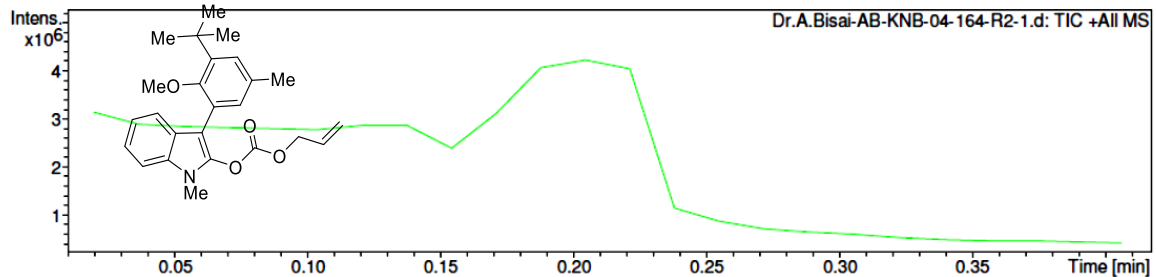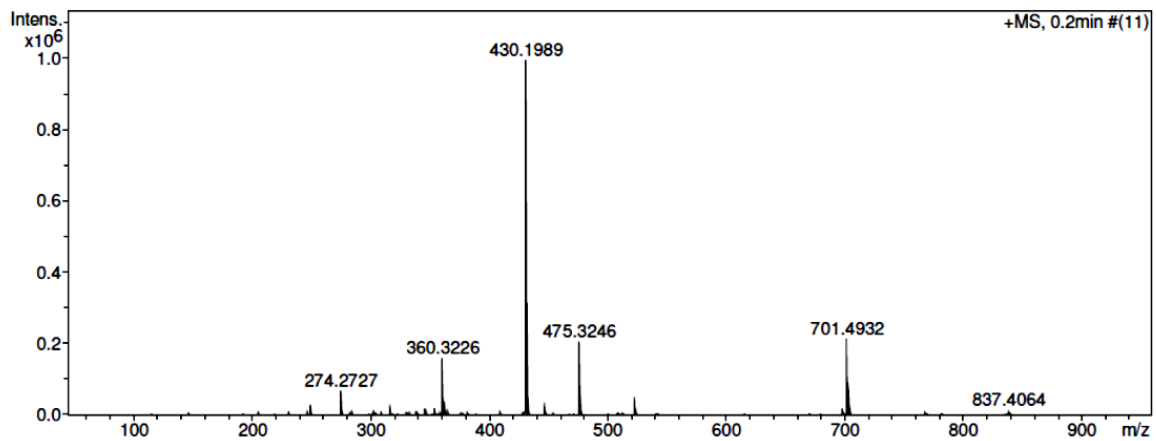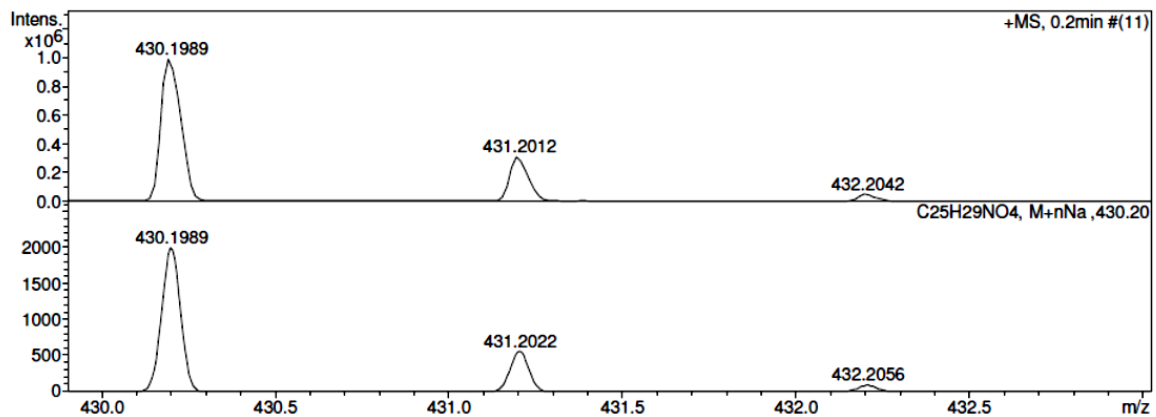

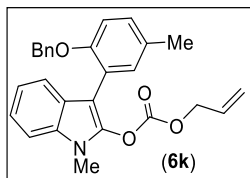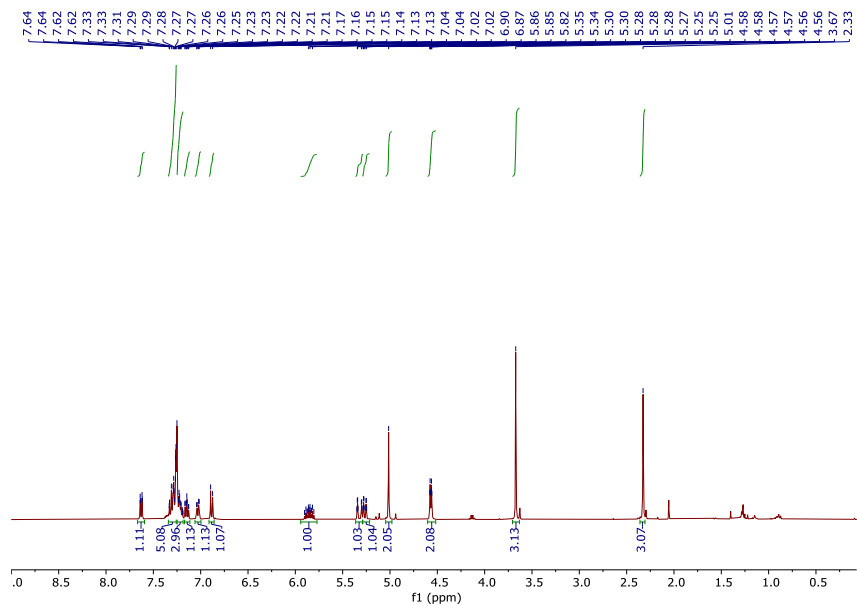

<sup>1</sup>H NMR (500 MHz, CDCl<sub>3</sub>) of compound **6k**

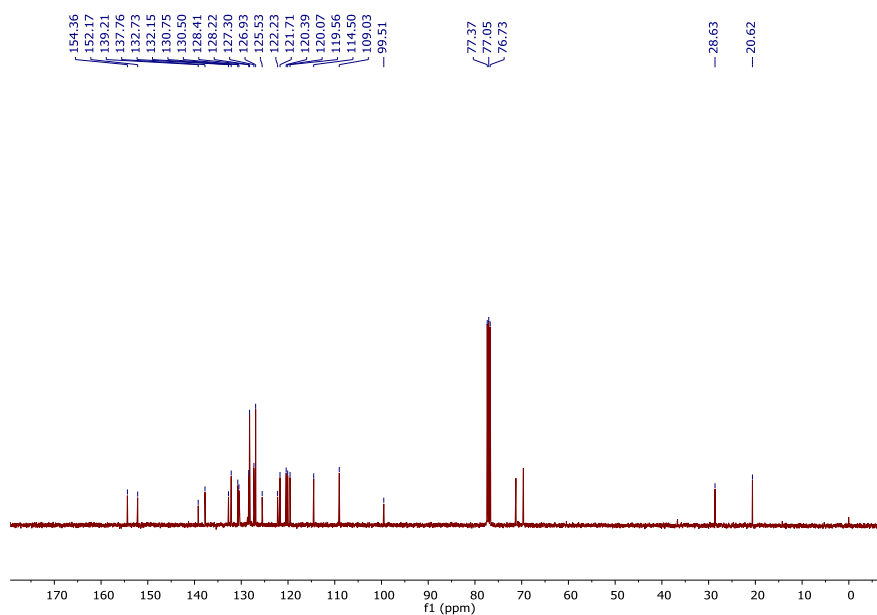

<sup>13</sup>C NMR (125 MHz, CDCl<sub>3</sub>) of compound **6k**

## Display Report

## Analysis Info

Analysis Name D:\Data\NEW USER DATA 2017\2018\May-2018\05-05-2018\Dr.A.Bisai-AB-KNB-03-077\_1-A,5\_01\_1575.d  
Method hrlcms-20 sept.m  
Sample Name Dr.A.Bisai-AB-KNB-03-077  
Comment

Acquisition Date 5/5/2018 10:47:58 AM

Dr.A.Bisai-AB-KNB-03-077\_1-A,5\_01\_1575.d

Operator RUCHI

Instrument micrOTOF-Q II 10330

## Acquisition Parameter

|             |          |                       |           |                  |           |
|-------------|----------|-----------------------|-----------|------------------|-----------|
| Source Type | ESI      | Ion Polarity          | Positive  | Set Nebulizer    | 1.2 Bar   |
| Focus       | Active   | Set Capillary         | 4500 V    | Set Dry Heater   | 200 °C    |
| Scan Begin  | 50 m/z   | Set End Plate Offset  | -500 V    | Set Dry Gas      | 7.0 l/min |
| Scan End    | 3000 m/z | Set Collision Cell RF | 130.0 Vpp | Set Divert Valve | Waste     |

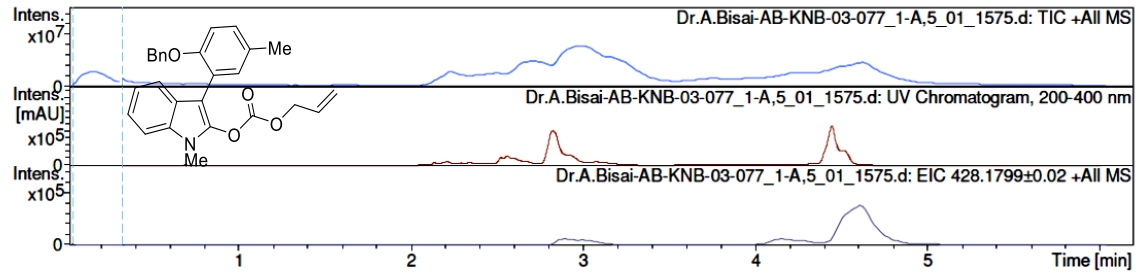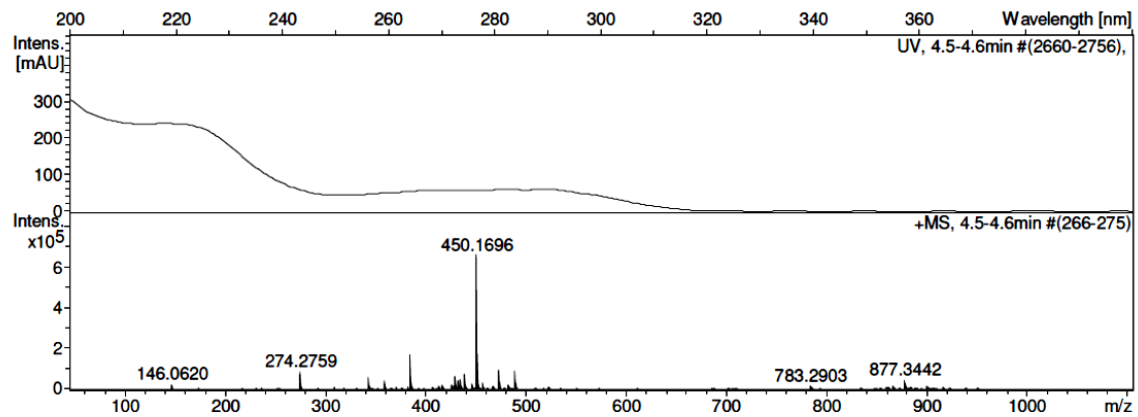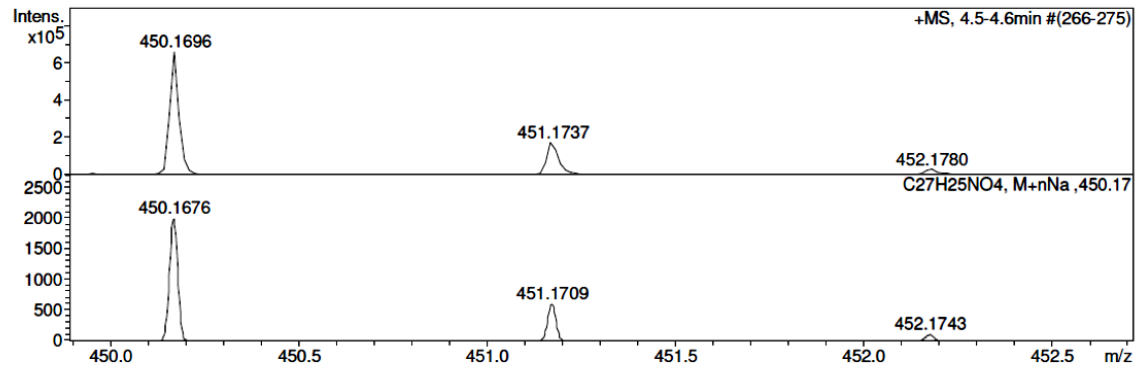

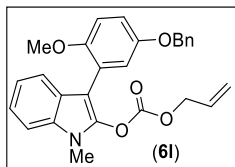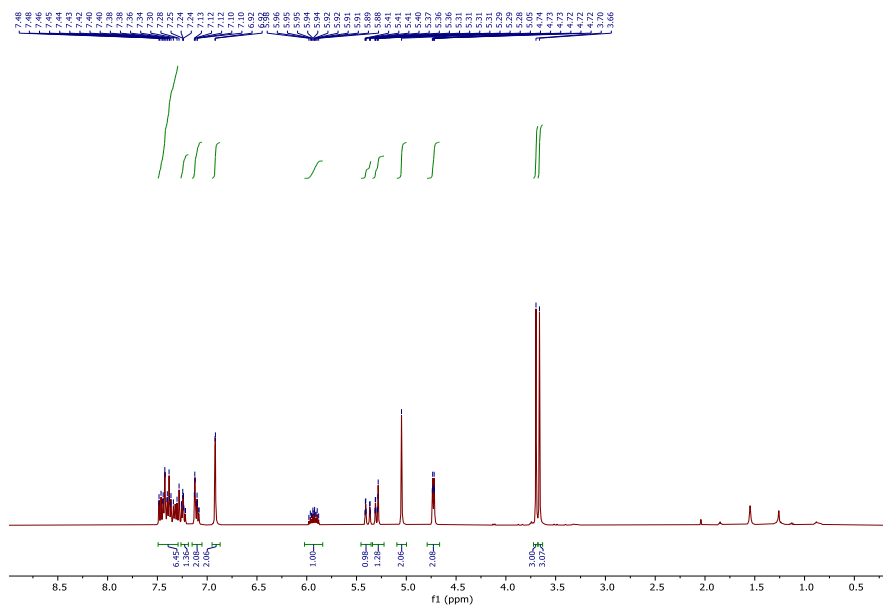 $^1\text{H}$  NMR (400 MHz,  $\text{CDCl}_3$ ) of compound **61**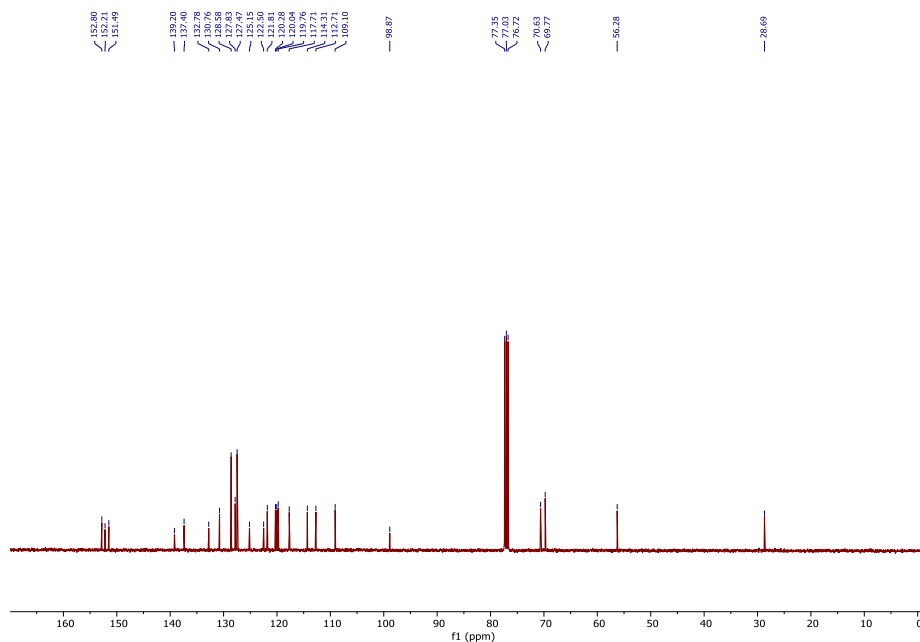 $^{13}\text{C}$  NMR (100 MHz,  $\text{CDCl}_3$ ) of compound **61**

## Display Report

## Analysis Info

|               |                                                                                           |                  |                       |
|---------------|-------------------------------------------------------------------------------------------|------------------|-----------------------|
| Analysis Name | D:\Data\NEW USER DATA 2017\2018\May-2018\23-05-2018\Dr A Bisai-KNB-04-081_1-A,2_01_1969.d | Acquisition Date | 5/23/2018 10:50:59 AM |
| Method        | hrlcms-20 sept.m                                                                          | Operator         | RUCHI                 |
| Sample Name   | Dr A Bisai-KNB-04-081                                                                     | Instrument       | micrOTOF-Q II 10330   |
| Comment       |                                                                                           |                  |                       |

## Acquisition Parameter

|             |          |                       |           |                  |           |
|-------------|----------|-----------------------|-----------|------------------|-----------|
| Source Type | ESI      | Ion Polarity          | Positive  | Set Nebulizer    | 1.2 Bar   |
| Focus       | Active   | Set Capillary         | 4500 V    | Set Dry Heater   | 200 °C    |
| Scan Begin  | 50 m/z   | Set End Plate Offset  | -500 V    | Set Dry Gas      | 7.0 l/min |
| Scan End    | 3000 m/z | Set Collision Cell RF | 130.0 Vpp | Set Divert Valve | Waste     |

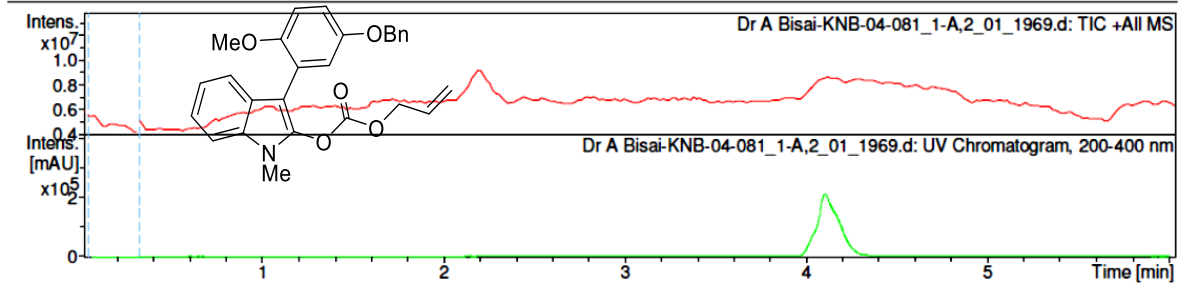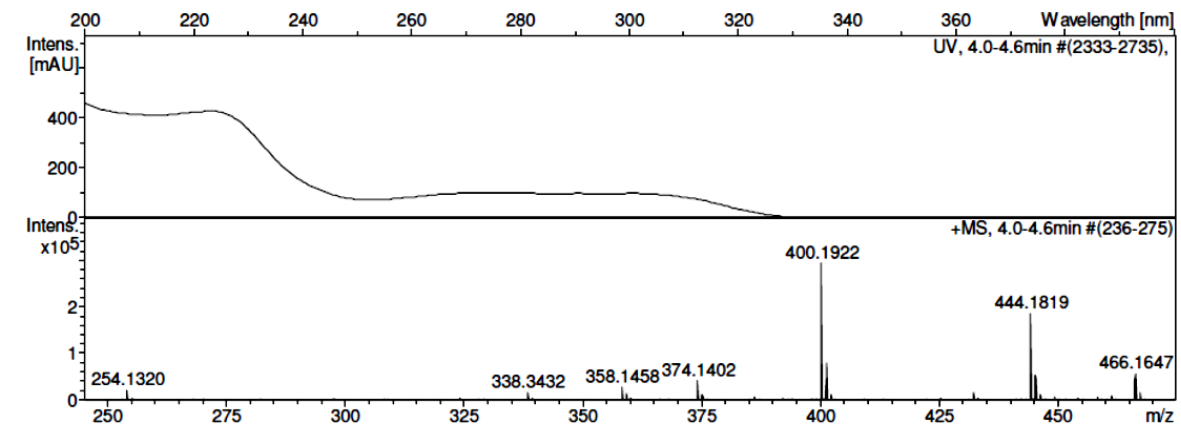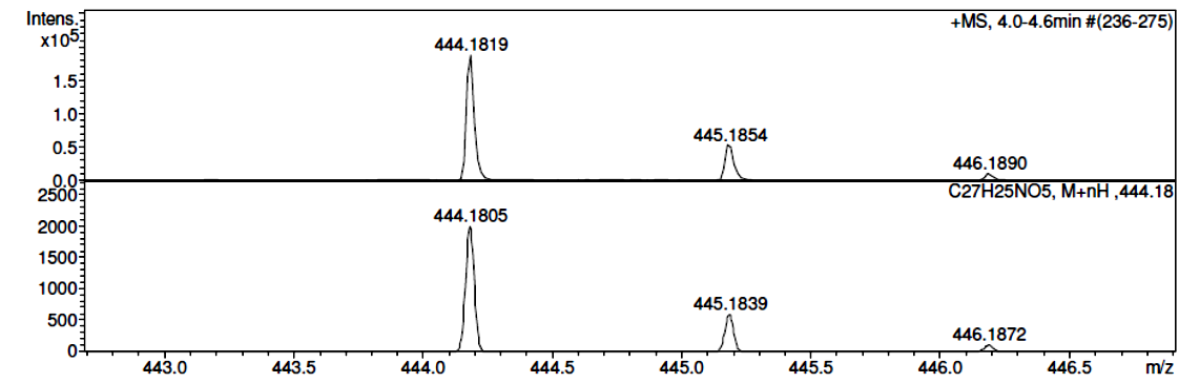



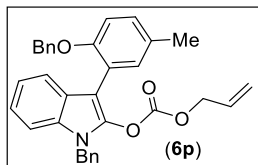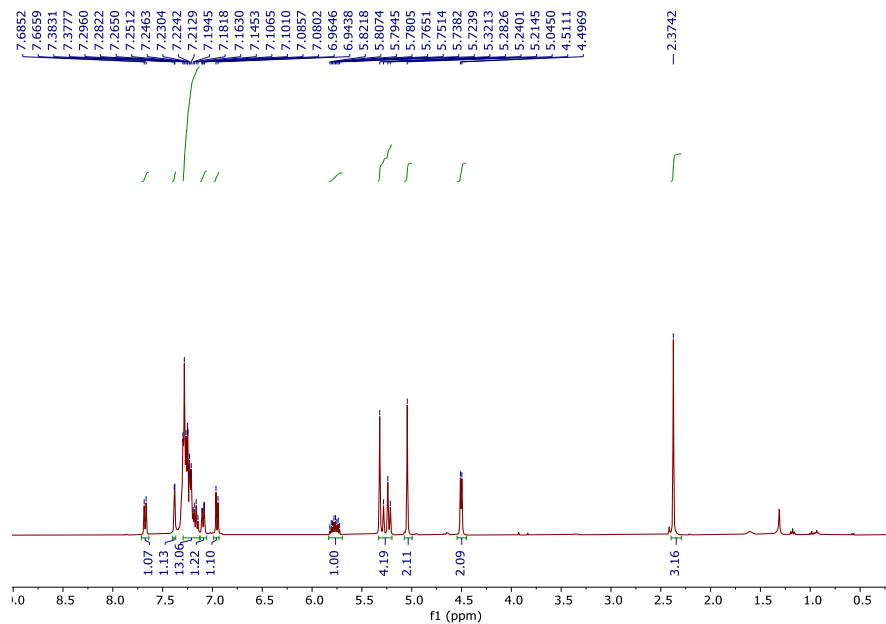 $^1\text{H}$  NMR (400 MHz,  $\text{CDCl}_3$ ) of compound **6p**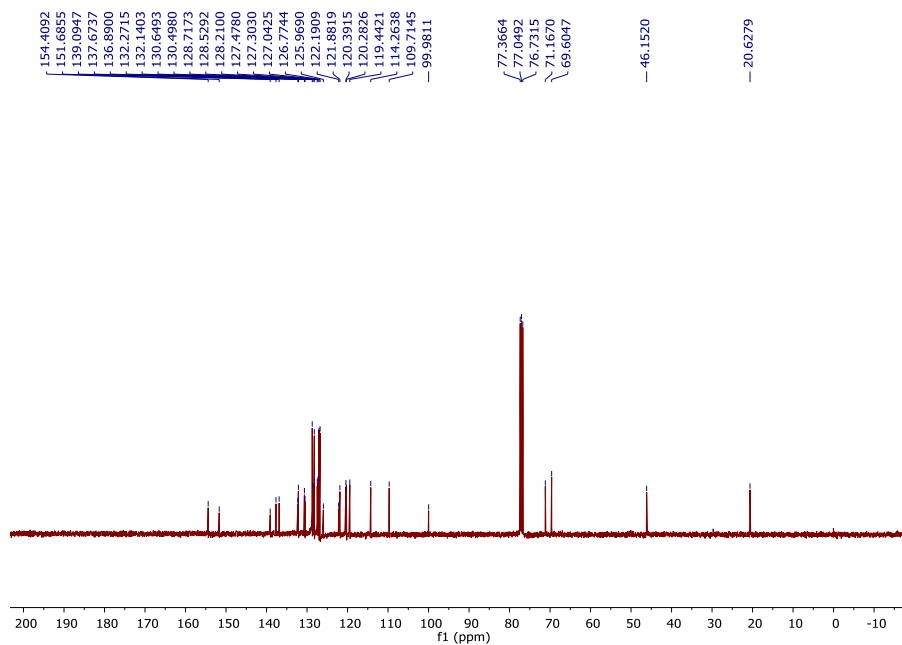 $^{13}\text{C}$  NMR (100 MHz,  $\text{CDCl}_3$ ) of compound **6p**

## Display Report

## Analysis Info

Analysis Name D:\Data\NEW USER DATA 2017\2018\May-2018\24-05-2018\Dr A Bisai-kNB-04-043.d  
Method tune mix\_low.New.021117.m  
Sample Name kNB-04-043  
Comment

Acquisition Date 5/24/2018 10:58:17 AM  
Operator RUCHI  
Instrument micrOTOF-Q II 10330

## Acquisition Parameter

|             |            |                       |           |                  |           |
|-------------|------------|-----------------------|-----------|------------------|-----------|
| Source Type | ESI        | Ion Polarity          | Positive  | Set Nebulizer    | 0.4 Bar   |
| Focus       | Not active | Set Capillary         | 4600 V    | Set Dry Heater   | 180 °C    |
| Scan Begin  | 50 m/z     | Set End Plate Offset  | -500 V    | Set Dry Gas      | 4.0 l/min |
| Scan End    | 3000 m/z   | Set Collision Cell RF | 100.0 Vpp | Set Divert Valve | Waste     |

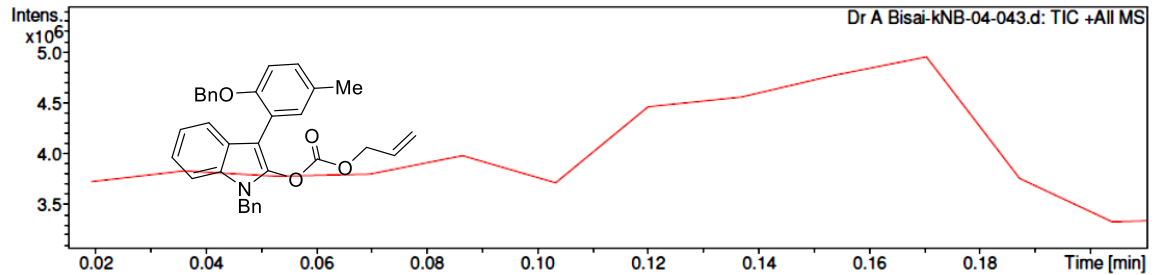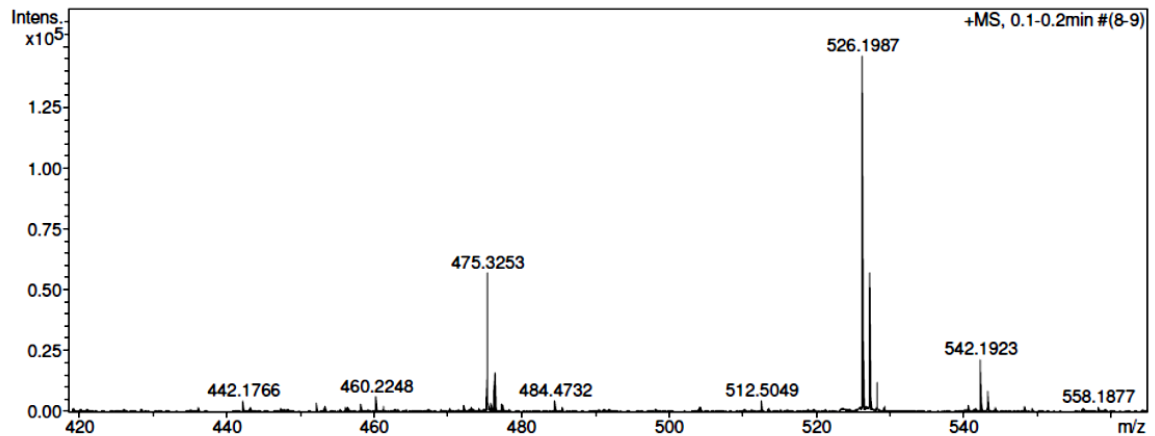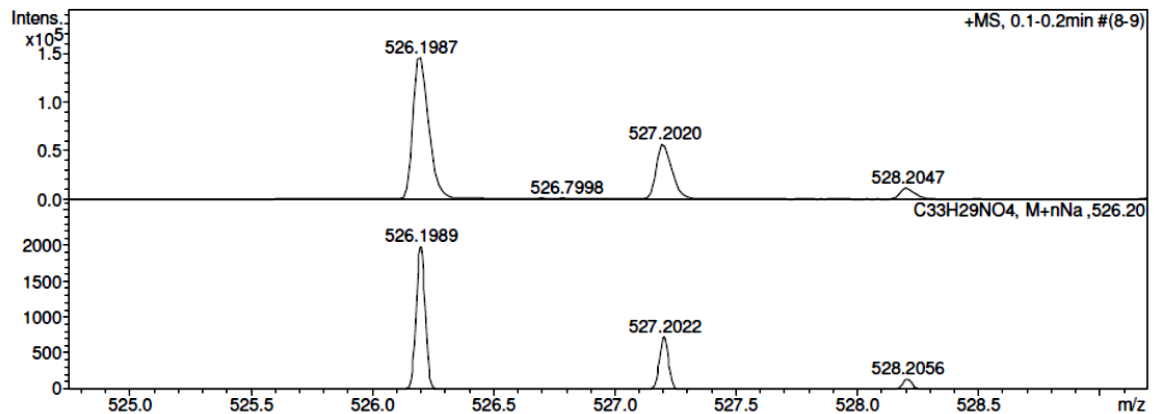

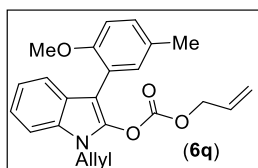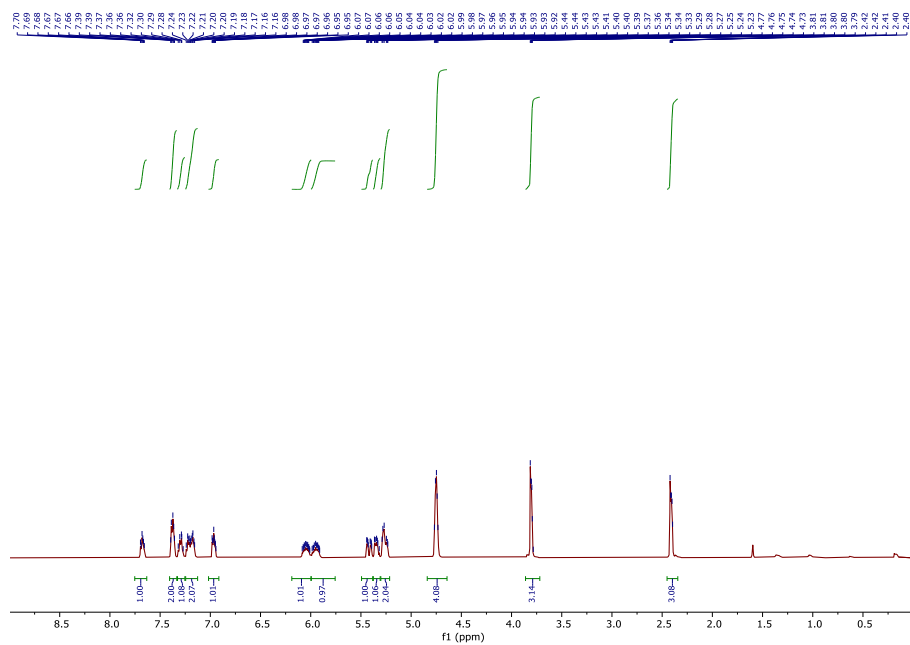<sup>1</sup>H NMR (500 MHz, CDCl<sub>3</sub>) of compound 6q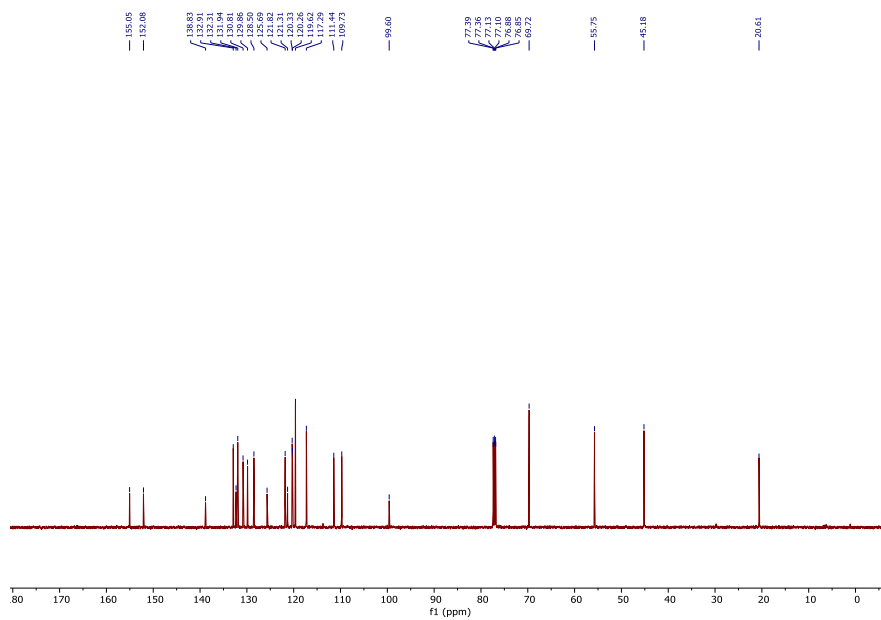<sup>13</sup>C NMR (125 MHz, CDCl<sub>3</sub>) of compound 6q

## Display Report

## Analysis Info

Analysis Name D:\Data\NEW USER DATA 2017\2018\May-2018\23-05-2018\Dr A Bisai-KNB-04-088-R\_1-A,3\_01\_1970.d  
Method hrlcms-20 sept.m  
Sample Name Dr A Bisai-KNB-04-088-R  
Comment

Acquisition Date 5/23/2018 10:58:09 AM  
Operator RUCHI  
Instrument micrOTOF-Q II 10330

## Acquisition Parameter

|             |          |                       |           |                  |           |
|-------------|----------|-----------------------|-----------|------------------|-----------|
| Source Type | ESI      | Ion Polarity          | Positive  | Set Nebulizer    | 1.2 Bar   |
| Focus       | Active   | Set Capillary         | 4500 V    | Set Dry Heater   | 200 °C    |
| Scan Begin  | 50 m/z   | Set End Plate Offset  | -500 V    | Set Dry Gas      | 7.0 l/min |
| Scan End    | 3000 m/z | Set Collision Cell RF | 130.0 Vpp | Set Divert Valve | Waste     |

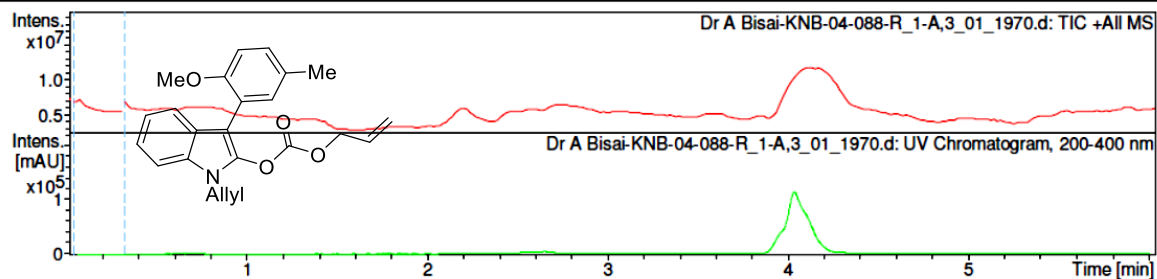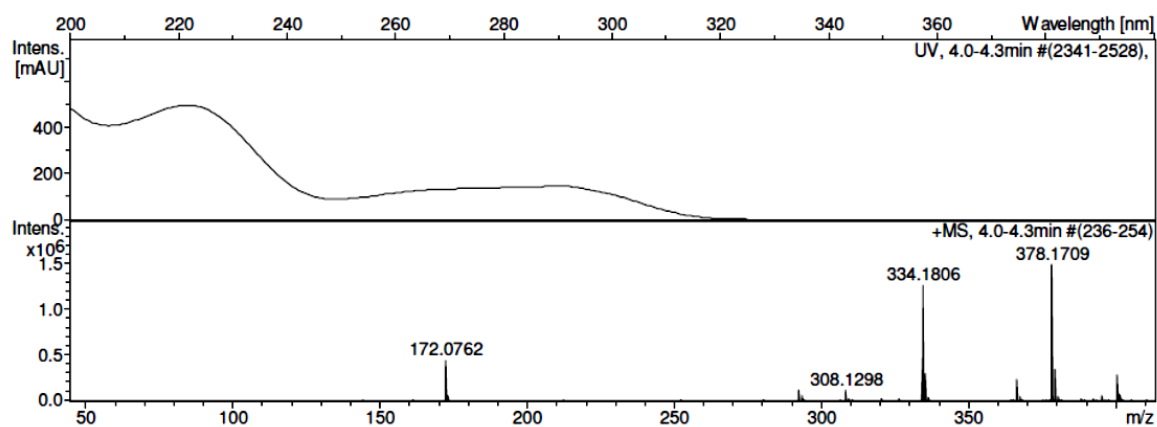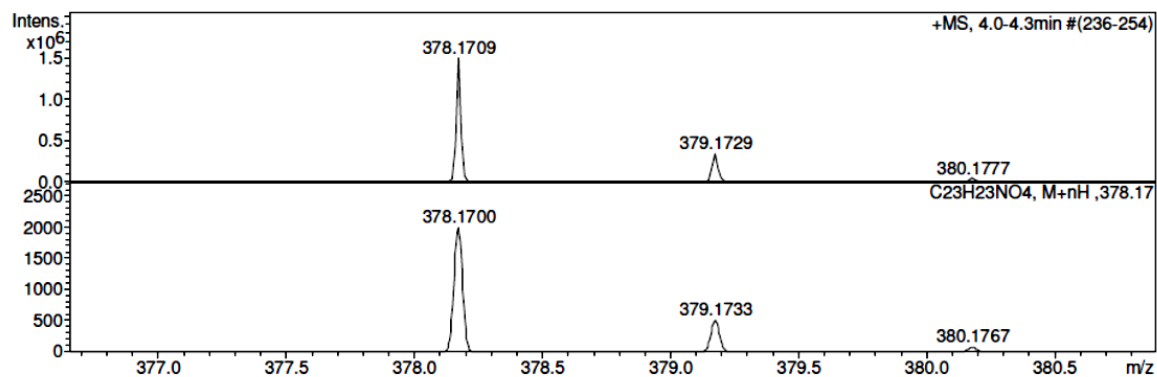



## Display Report

**Analysis Info**

|               |                                                                                           |                  |                      |
|---------------|-------------------------------------------------------------------------------------------|------------------|----------------------|
| Analysis Name | D:\Data\NEW USER DATA 2017\2018\May-2018\09-05-2018\Dr A Bisai-KNB-04-089_1-A,8_01_1657.d | Acquisition Date | 5/9/2018 12:12:08 PM |
| Method        | hrlcms-20 sept.m                                                                          | Operator         | RUCHI                |
| Sample Name   | Dr A Bisai-KNB-04-089                                                                     | Instrument       | micrOTOF-Q II 10330  |
| Comment       |                                                                                           |                  |                      |

**Acquisition Parameter**

|             |          |                       |           |                  |           |
|-------------|----------|-----------------------|-----------|------------------|-----------|
| Source Type | ESI      | Ion Polarity          | Positive  | Set Nebulizer    | 1.2 Bar   |
| Focus       | Active   | Set Capillary         | 4500 V    | Set Dry Heater   | 200 °C    |
| Scan Begin  | 50 m/z   | Set End Plate Offset  | -500 V    | Set Dry Gas      | 7.0 l/min |
| Scan End    | 3000 m/z | Set Collision Cell RF | 130.0 Vpp | Set Divert Valve | Waste     |

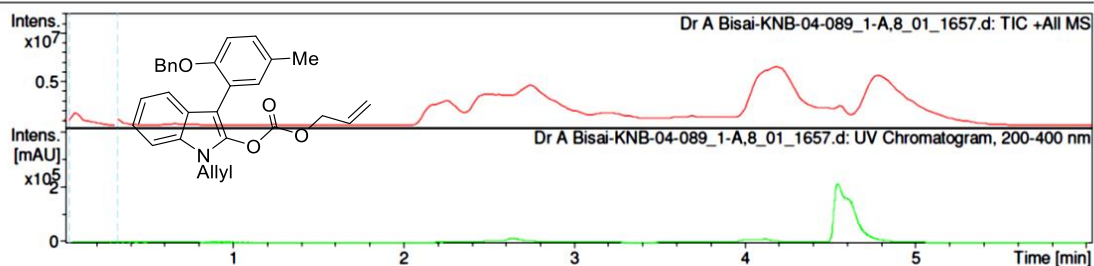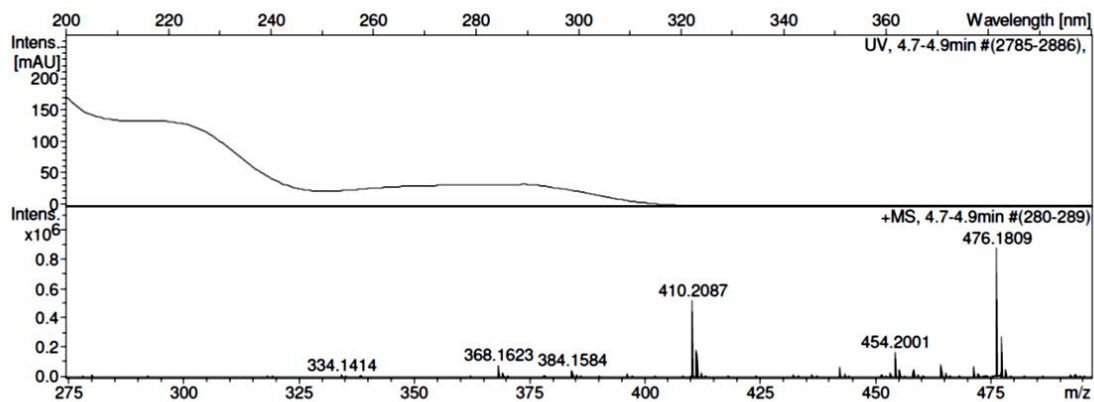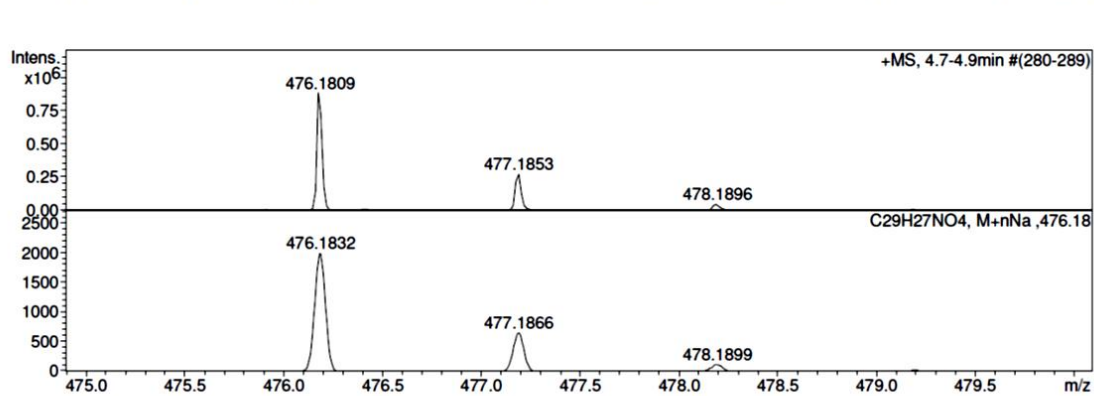Scanned copy of mass spectrum of **6r**

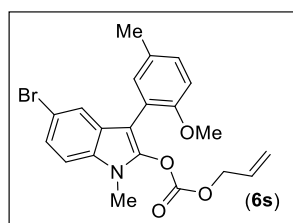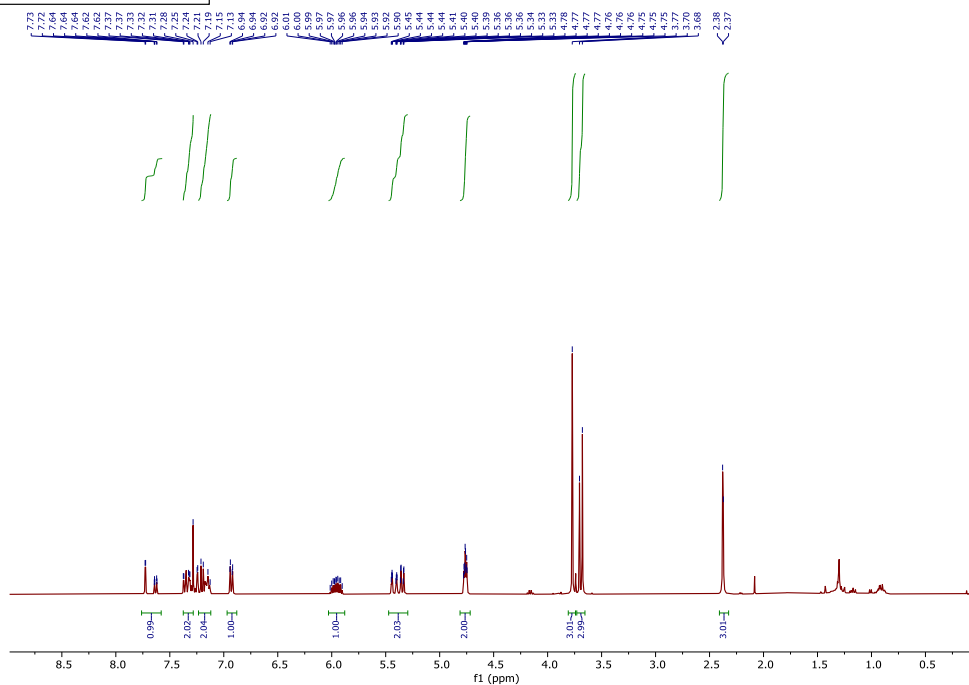

$^1\text{H}$  NMR (500 MHz,  $\text{CDCl}_3$ ) of compound **6s**

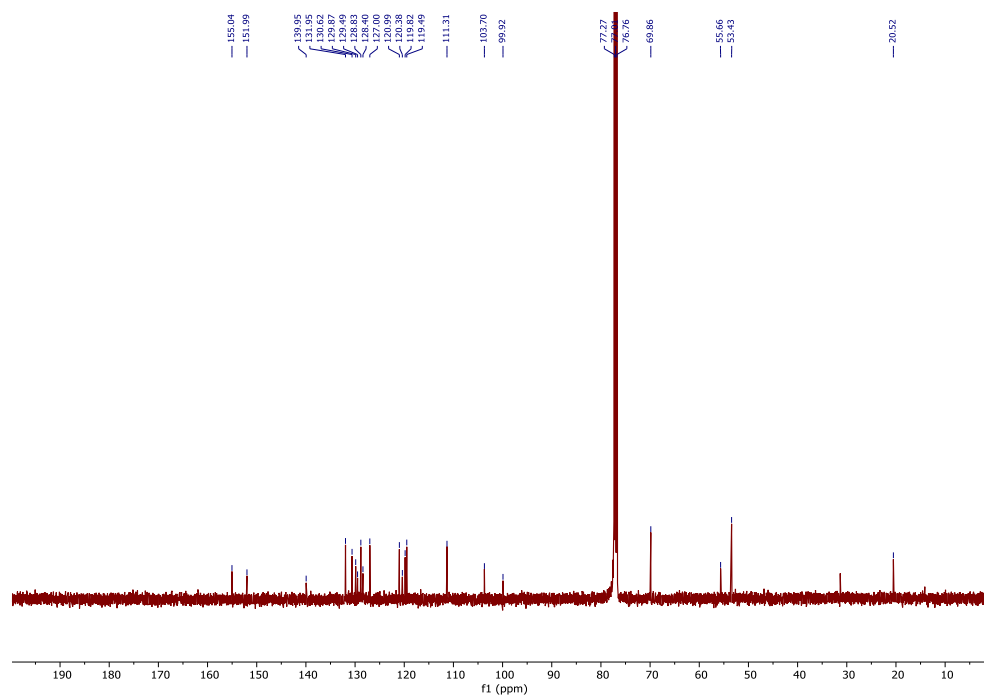

$^{13}\text{C}$  NMR (500 MHz,  $\text{CDCl}_3$ ) of compound **6s**

## Display Report

**Analysis Info**

|               |                                                                                  |                  |                       |
|---------------|----------------------------------------------------------------------------------|------------------|-----------------------|
| Analysis Name | D:\Data\NEW USER DATA 2017\2019\JUNE\10 june\Dr A Bisai-AM-03-10_1-A,3_01_6852.d | Acquisition Date | 6/10/2019 10:19:02 AM |
| Method        | hrlcms-20 sept.m                                                                 | Operator         | RUCHI                 |
| Sample Name   | Dr A Bisai-AM-03-10                                                              | Instrument       | micrOTOF-Q II 10330   |
| Comment       |                                                                                  |                  |                       |

**Acquisition Parameter**

|             |          |                       |           |                  |           |
|-------------|----------|-----------------------|-----------|------------------|-----------|
| Source Type | ESI      | Ion Polarity          | Positive  | Set Nebulizer    | 1.2 Bar   |
| Focus       | Active   | Set Capillary         | 4500 V    | Set Dry Heater   | 200 °C    |
| Scan Begin  | 50 m/z   | Set End Plate Offset  | -500 V    | Set Dry Gas      | 7.0 l/min |
| Scan End    | 3000 m/z | Set Collision Cell RF | 130.0 Vpp | Set Divert Valve | Waste     |

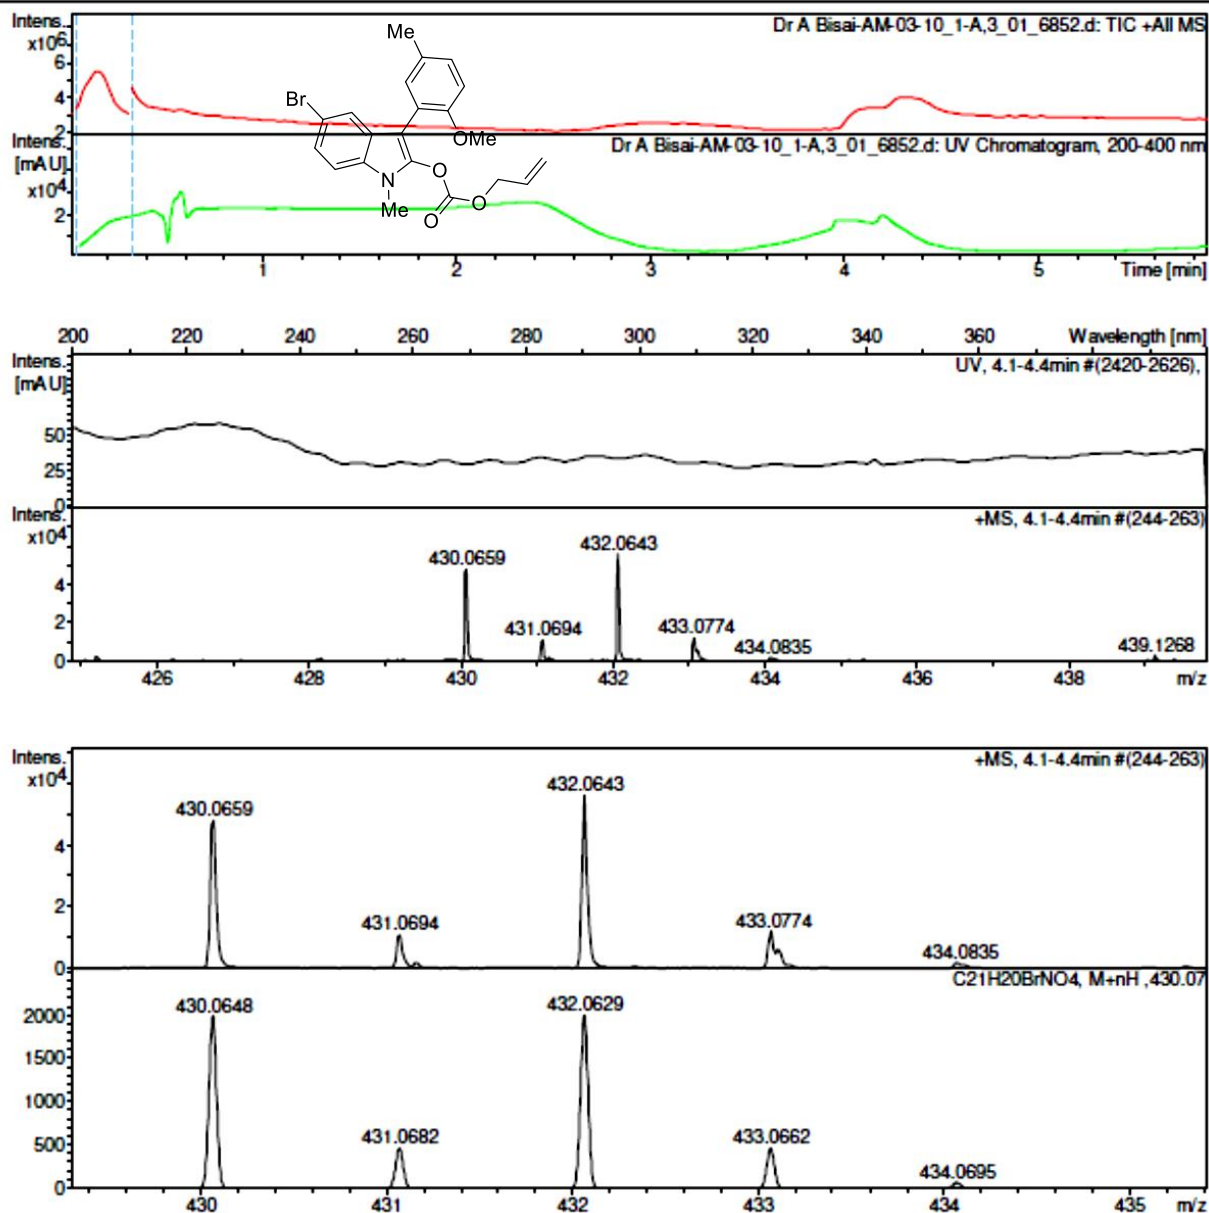

Scanned copy of mass spectrum of 6s



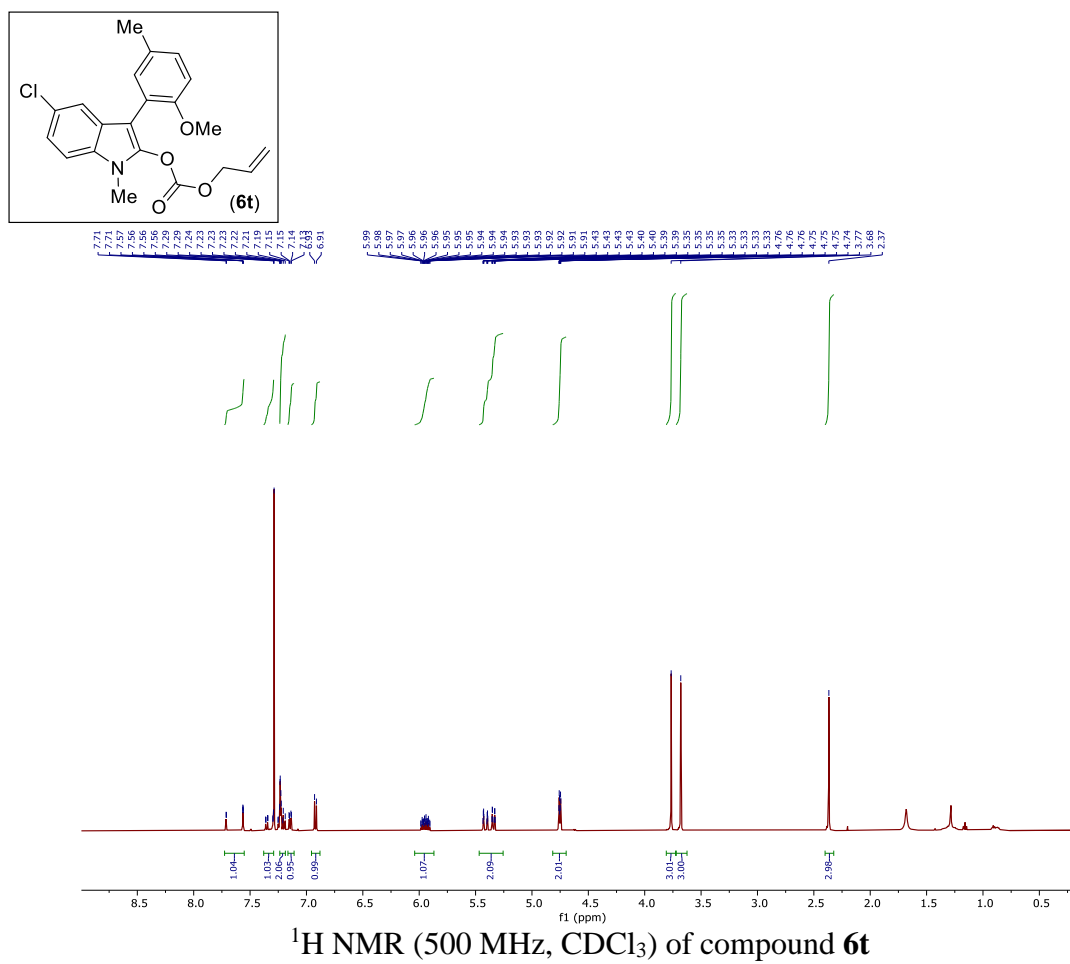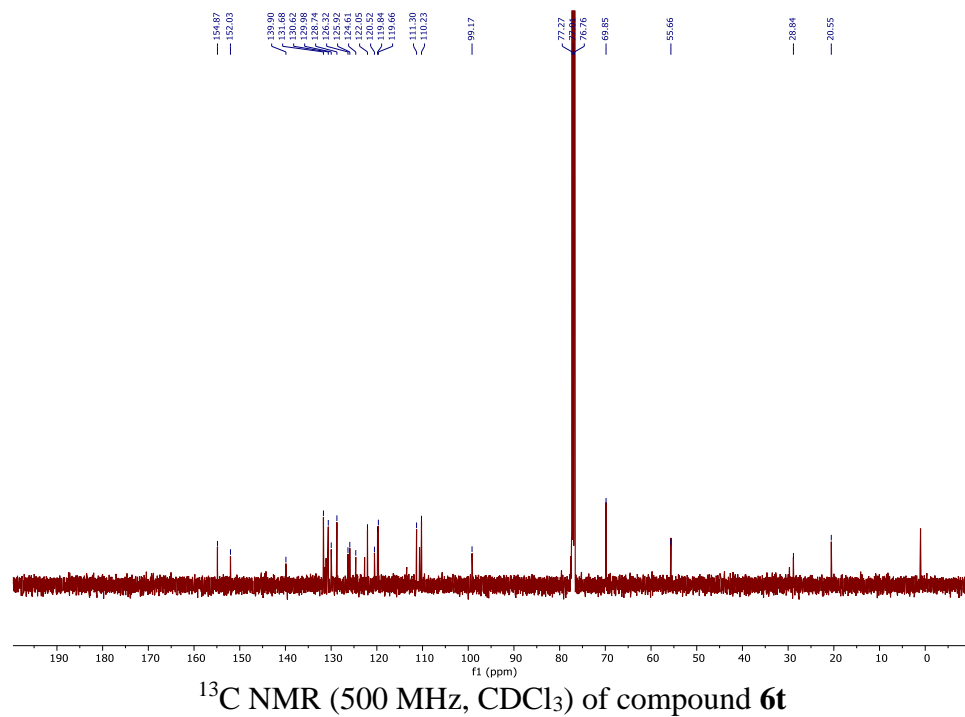

## Display Report

| Analysis Info |                                                                                  | Acquisition Date      |                     |
|---------------|----------------------------------------------------------------------------------|-----------------------|---------------------|
| Analysis Name | D:\Data\NEW USER DATA 2017\2019\JUNE\10 june\Dr A Bisai-AM-03-12_1-B,2_01_6863.d | 6/10/2019 11:38:18 AM |                     |
| Method        | hrlcms-20 sept.m                                                                 | Operator              | RUCHI               |
| Sample Name   | Dr A Bisai-AM-03-12                                                              | Instrument            | micrOTOF-Q II 10330 |
| Comment       |                                                                                  |                       |                     |

### Acquisition Parameter

|             |          |                       |           |                  |           |
|-------------|----------|-----------------------|-----------|------------------|-----------|
| Source Type | ESI      | Ion Polarity          | Positive  | Set Nebulizer    | 1.2 Bar   |
| Focus       | Active   | Set Capillary         | 4500 V    | Set Dry Heater   | 200 °C    |
| Scan Begin  | 50 m/z   | Set End Plate Offset  | -500 V    | Set Dry Gas      | 7.0 l/min |
| Scan End    | 3000 m/z | Set Collision Cell RF | 130.0 Vpp | Set Divert Valve | Waste     |

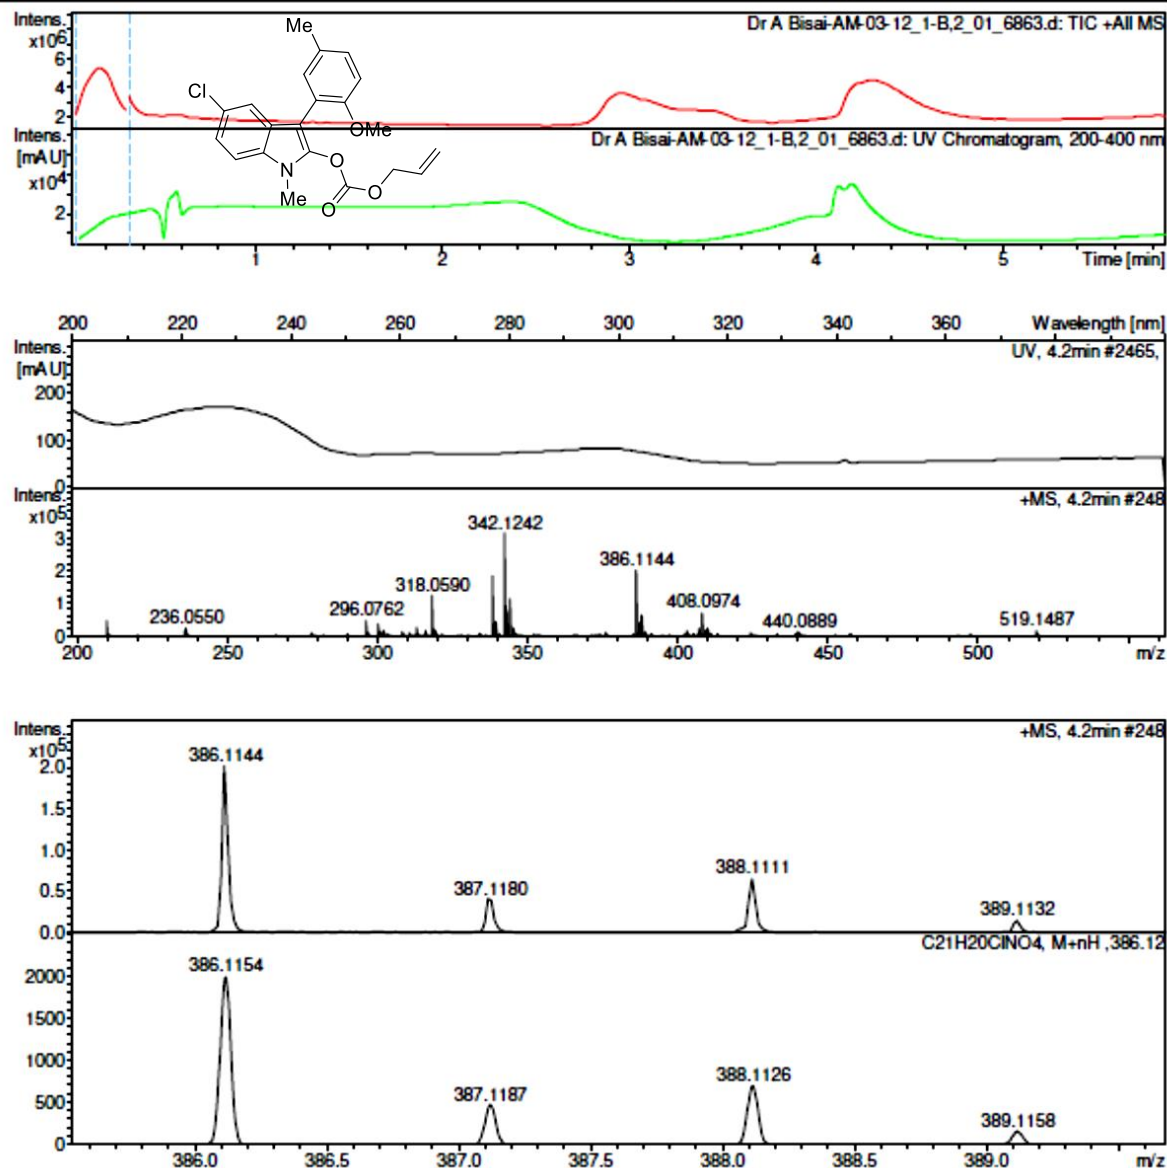Scanned copy of mass spectrum of **6t**

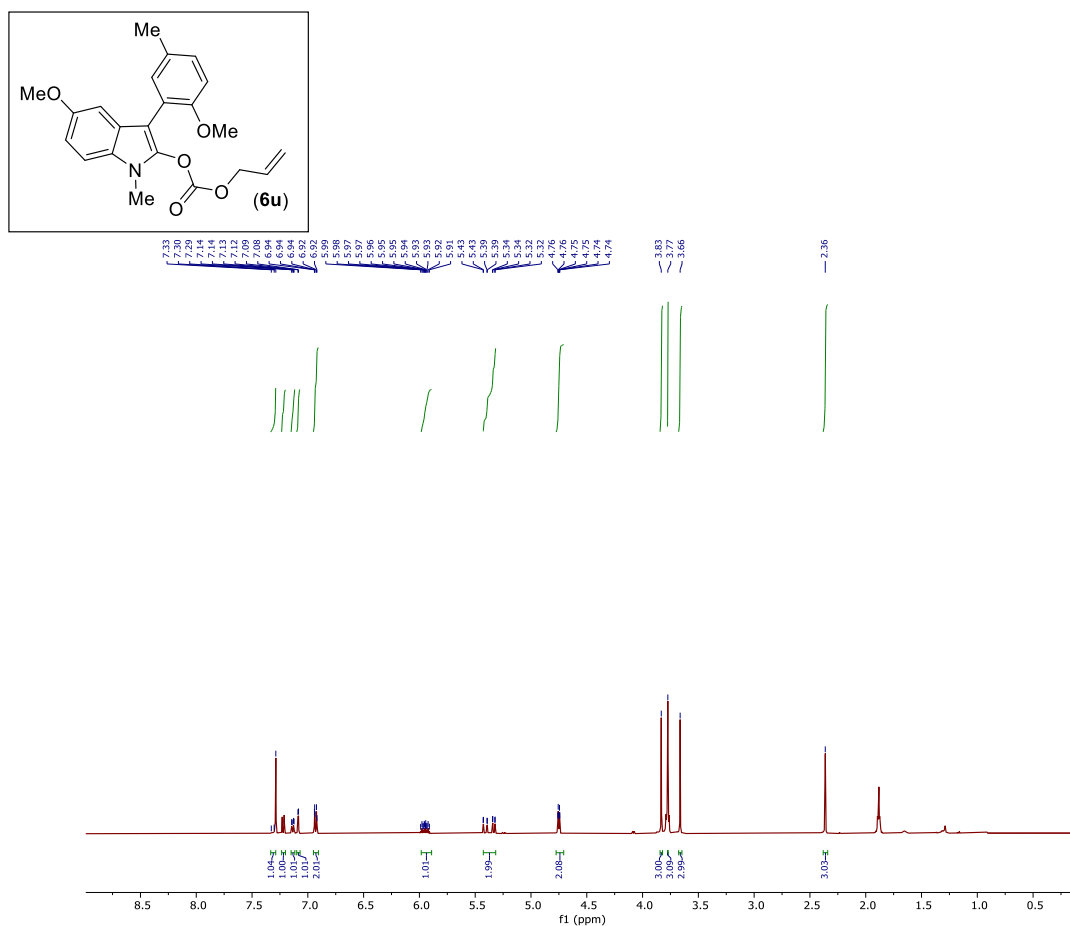

**<sup>1</sup>H NMR (500 MHz, CDCl<sub>3</sub>) of compound **6u****

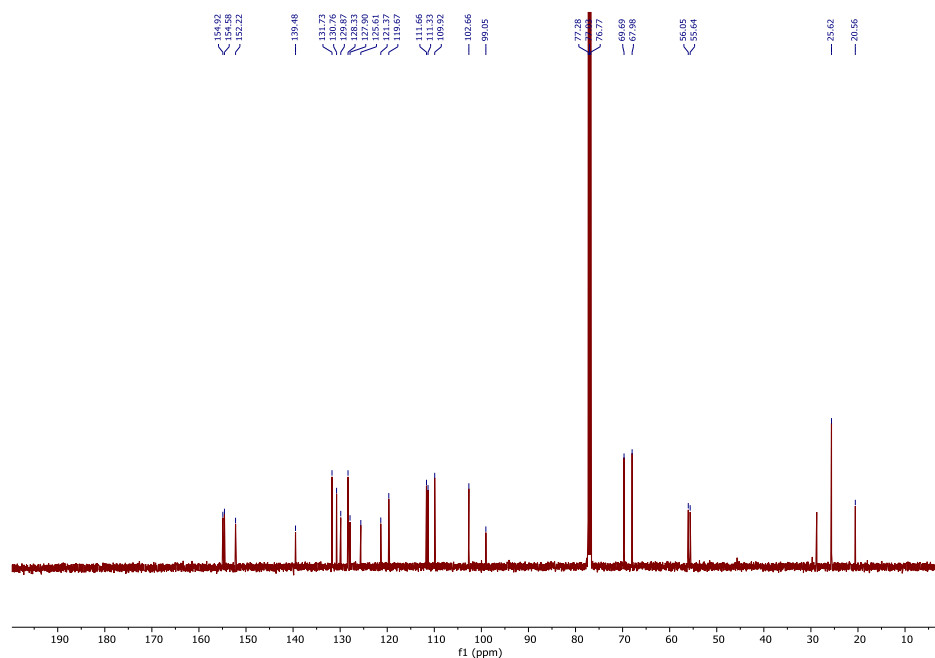

**<sup>13</sup>C NMR (500 MHz, CDCl<sub>3</sub>) of compound **6u****

## Display Report

**Analysis Info**

|               |                                                                                  |                  |                       |
|---------------|----------------------------------------------------------------------------------|------------------|-----------------------|
| Analysis Name | D:\Data\NEW USER DATA 2017\2019\JUNE\10 june\Dr A Bisai-AM-03-15_1-B,5_01_6867.d | Acquisition Date | 6/10/2019 12:07:05 PM |
| Method        | hrlcms-20 sept.m                                                                 | Operator         | RUCHI                 |
| Sample Name   | Dr A Bisai-AM-03-15                                                              | Instrument       | micrOTOF-Q II 10330   |
| Comment       |                                                                                  |                  |                       |

**Acquisition Parameter**

|             |          |                       |           |                  |           |
|-------------|----------|-----------------------|-----------|------------------|-----------|
| Source Type | ESI      | Ion Polarity          | Positive  | Set Nebulizer    | 1.2 Bar   |
| Focus       | Active   | Set Capillary         | 4500 V    | Set Dry Heater   | 200 °C    |
| Scan Begin  | 50 m/z   | Set End Plate Offset  | -500 V    | Set Dry Gas      | 7.0 l/min |
| Scan End    | 3000 m/z | Set Collision Cell RF | 130.0 Vpp | Set Divert Valve | Waste     |

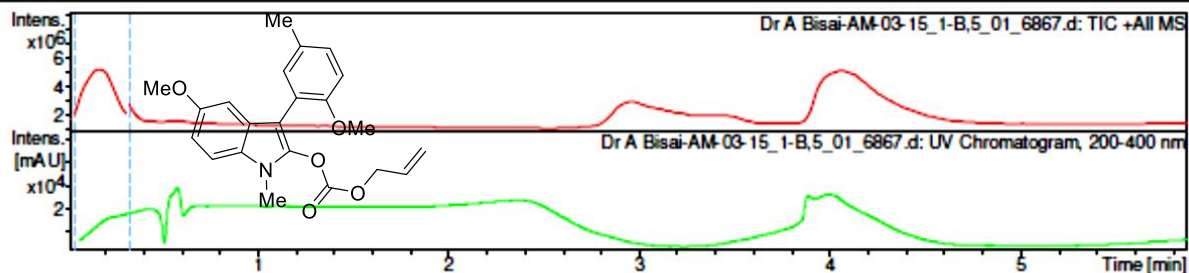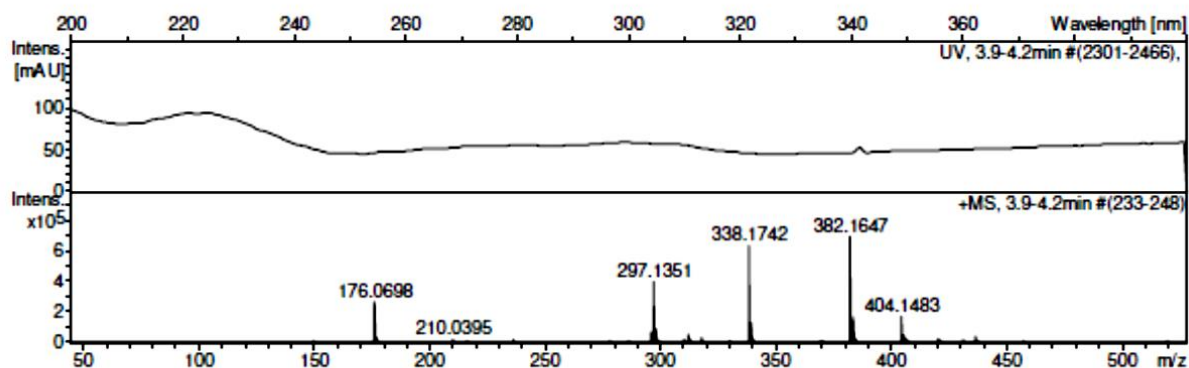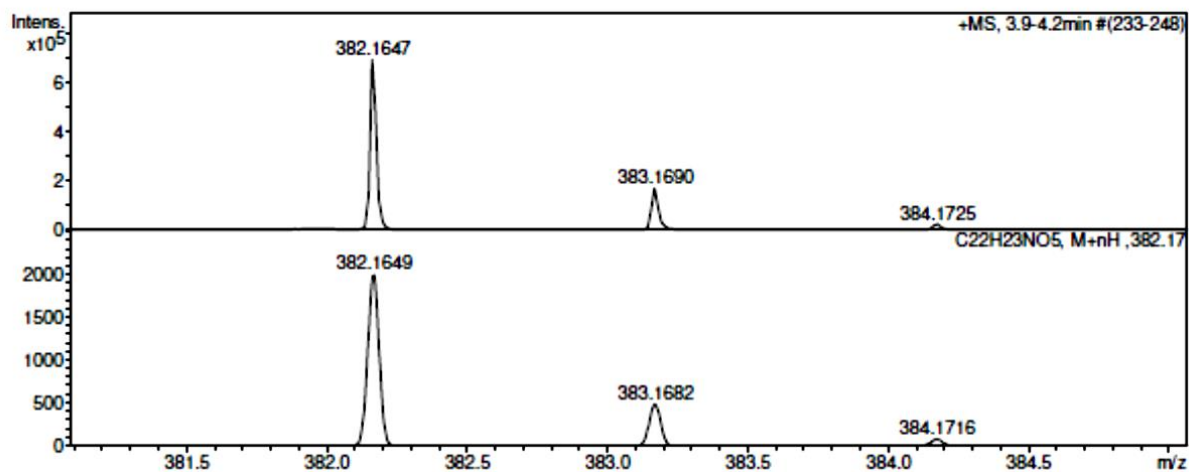Scanned copy of mass spectrum of **6u**

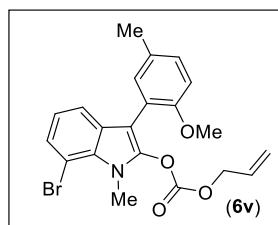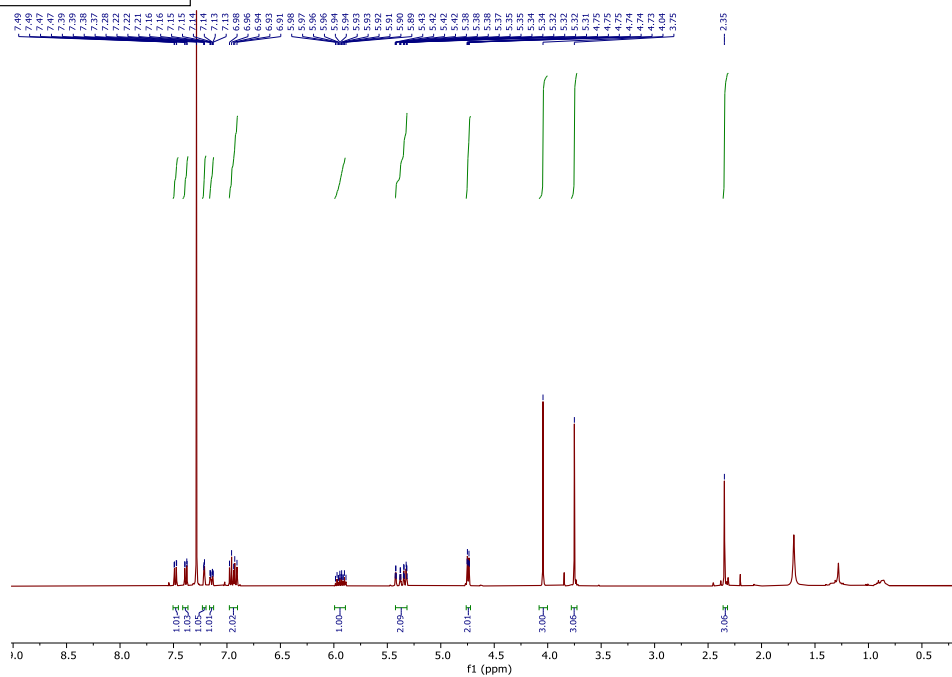

<sup>1</sup>H NMR (500 MHz, CDCl<sub>3</sub>) of compound **6v**

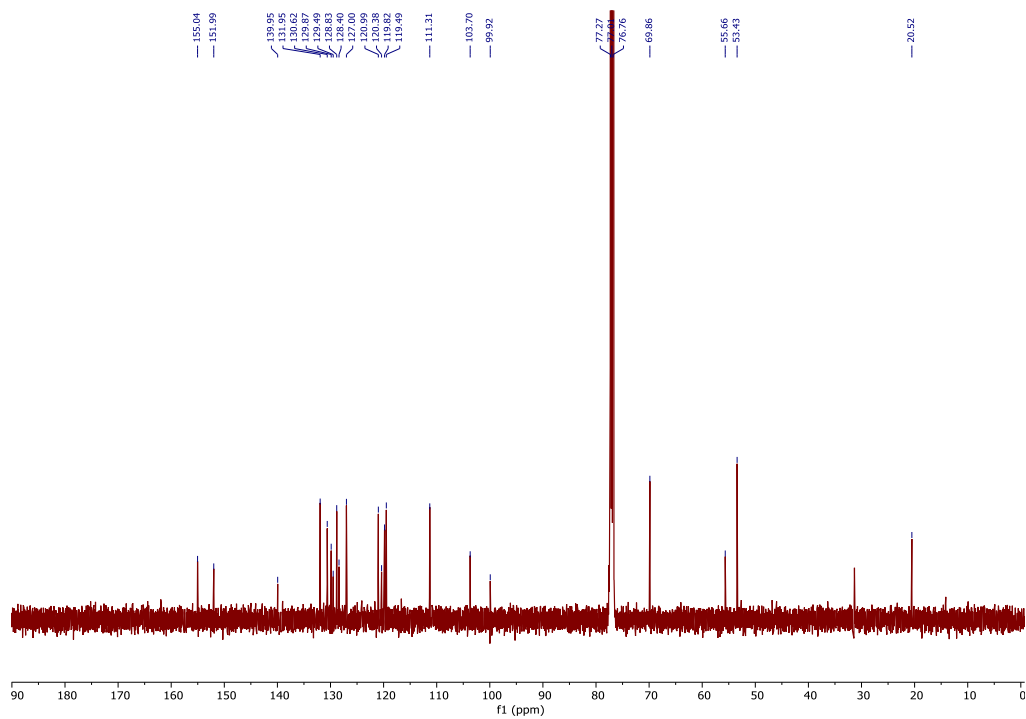

<sup>13</sup>C NMR (500 MHz, CDCl<sub>3</sub>) of compound **6v**

## Display Report

## Analysis Info

Analysis Name D:\Data\NEW USER DATA 2017\2019\JUNE\10 june\Dr A Bisai-AM-03-24\_1-A\_8\_01\_6860.d  
Method hrlcms-20 sept.m  
Sample Name Dr A Bisai-AM-03-24  
Comment

Acquisition Date 6/10/2019 11:16:43 AM  
Operator RUCHI  
Instrument micrOTOF-Q II 10330

## Acquisition Parameter

|             |          |                       |           |                  |           |
|-------------|----------|-----------------------|-----------|------------------|-----------|
| Source Type | ESI      | Ion Polarity          | Positive  | Set Nebulizer    | 1.2 Bar   |
| Focus       | Active   | Set Capillary         | 4500 V    | Set Dry Heater   | 200 °C    |
| Scan Begin  | 50 m/z   | Set End Plate Offset  | -500 V    | Set Dry Gas      | 7.0 l/min |
| Scan End    | 3000 m/z | Set Collision Cell RF | 130.0 Vpp | Set Divert Valve | Waste     |

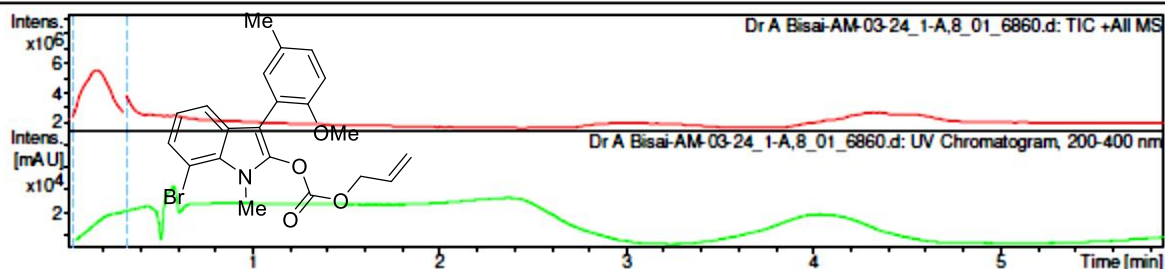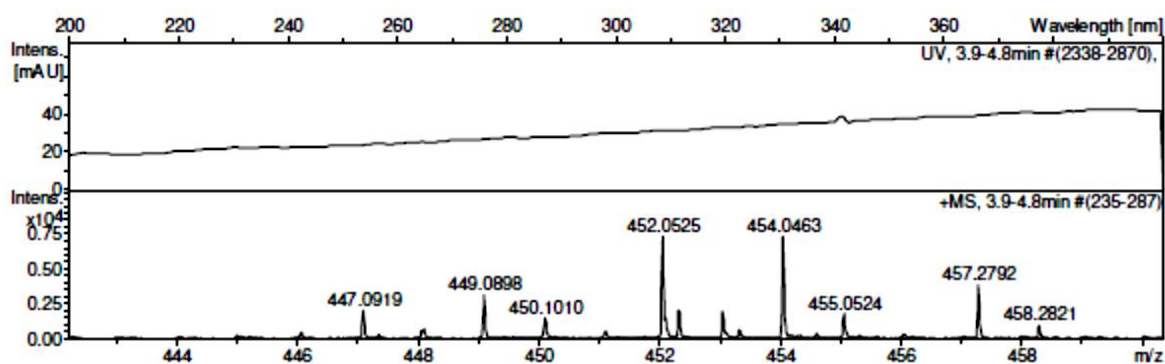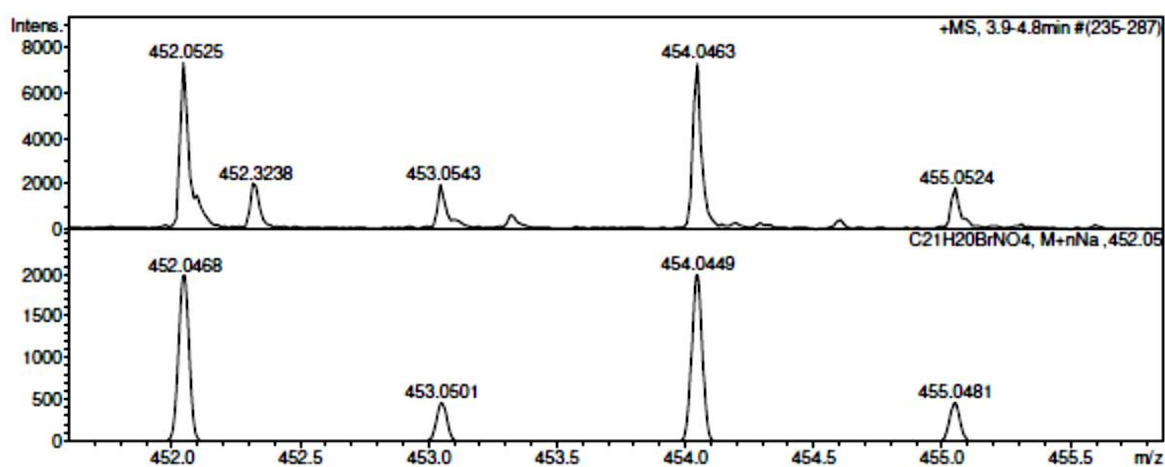

Scanned copy of mass spectrum of 6v

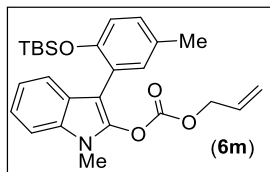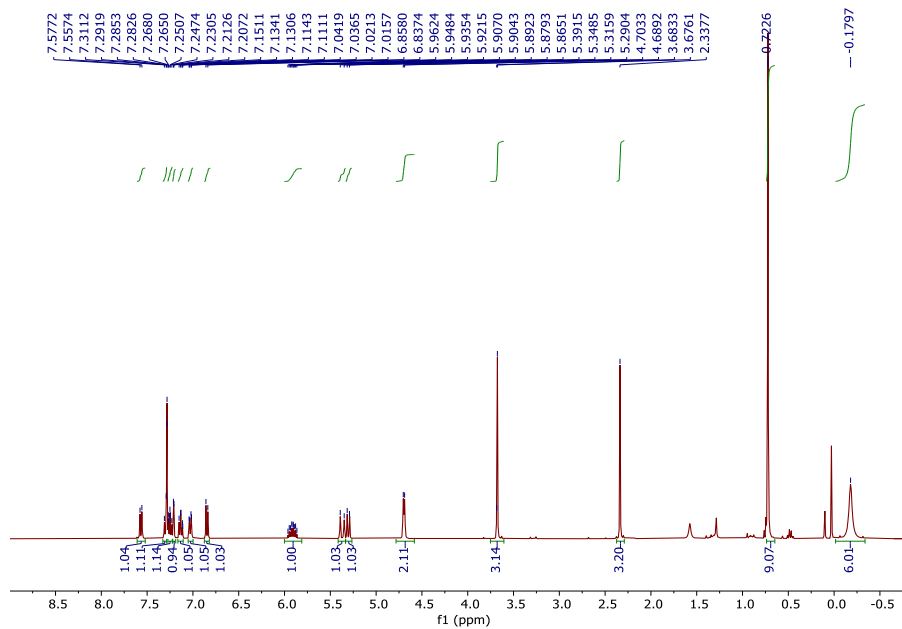

<sup>1</sup>H NMR (400 MHz, CDCl<sub>3</sub>) of compound **6m**

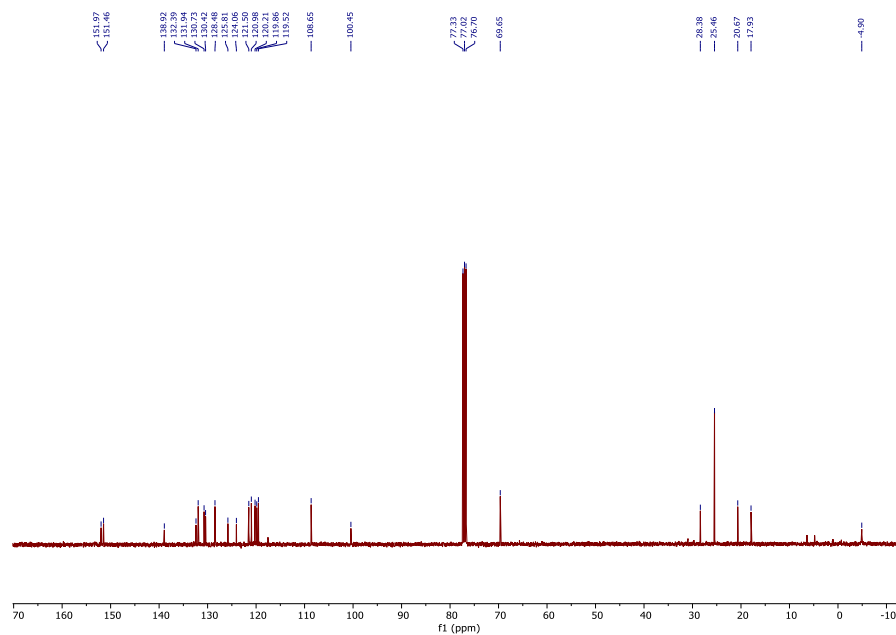

<sup>13</sup>C NMR (100 MHz, CDCl<sub>3</sub>) of compound **6m**

## Display Report

**Analysis Info**

|                  |                                                                                           |
|------------------|-------------------------------------------------------------------------------------------|
| Analysis Name    | D:\Data\NEW USER DATA 2017\2018\May-2018\09-05-2018\Dr A Bisai-KNB-04-127_1-B,1_01_1658.d |
| Method           | hrlcms-20 sept.m                                                                          |
| Sample Name      | Dr A Bisai-KNB-04-127                                                                     |
| Comment          |                                                                                           |
| Acquisition Date | 5/9/2018 12:19:19 PM                                                                      |
| Operator         | RUCHI                                                                                     |
| Instrument       | micrOTOF-Q II 10330                                                                       |

**Acquisition Parameter**

|             |          |                       |           |                  |           |
|-------------|----------|-----------------------|-----------|------------------|-----------|
| Source Type | ESI      | Ion Polarity          | Positive  | Set Nebulizer    | 1.2 Bar   |
| Focus       | Active   | Set Capillary         | 4500 V    | Set Dry Heater   | 200 °C    |
| Scan Begin  | 50 m/z   | Set End Plate Offset  | -500 V    | Set Dry Gas      | 7.0 l/min |
| Scan End    | 3000 m/z | Set Collision Cell RF | 130.0 Vpp | Set Divert Valve | Waste     |

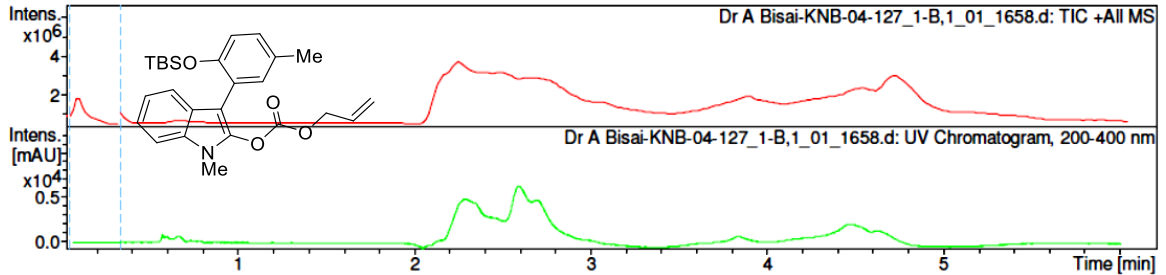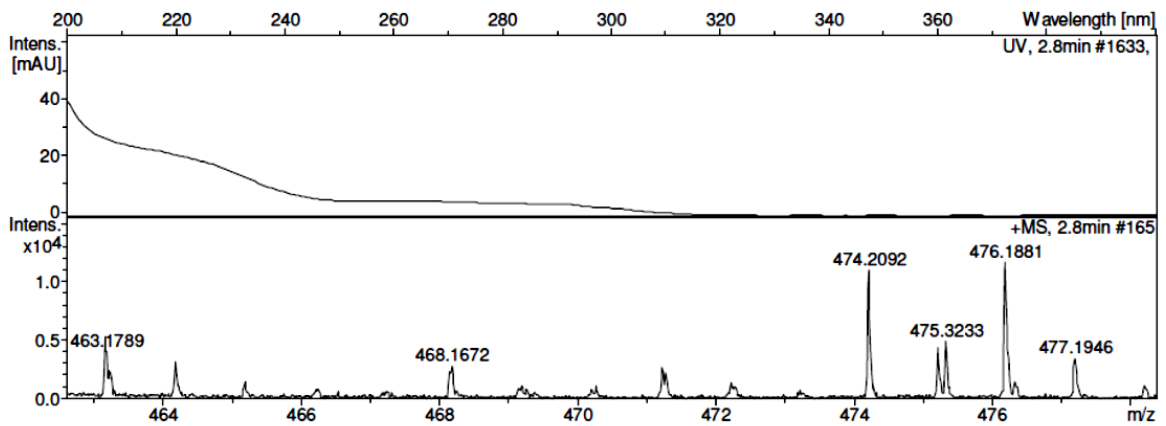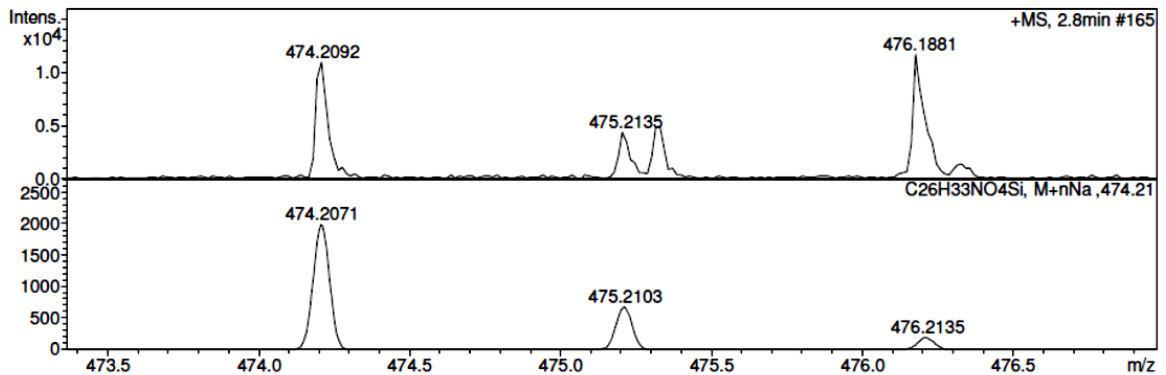



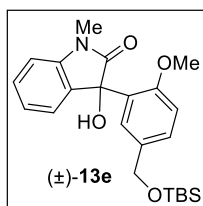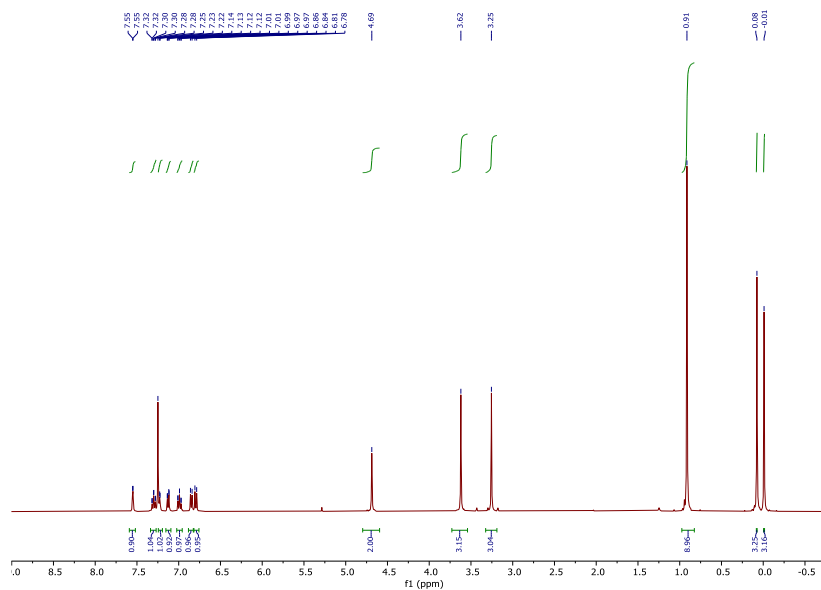

<sup>1</sup>H NMR (400 MHz, CDCl<sub>3</sub>) of compound (±)-**13e**

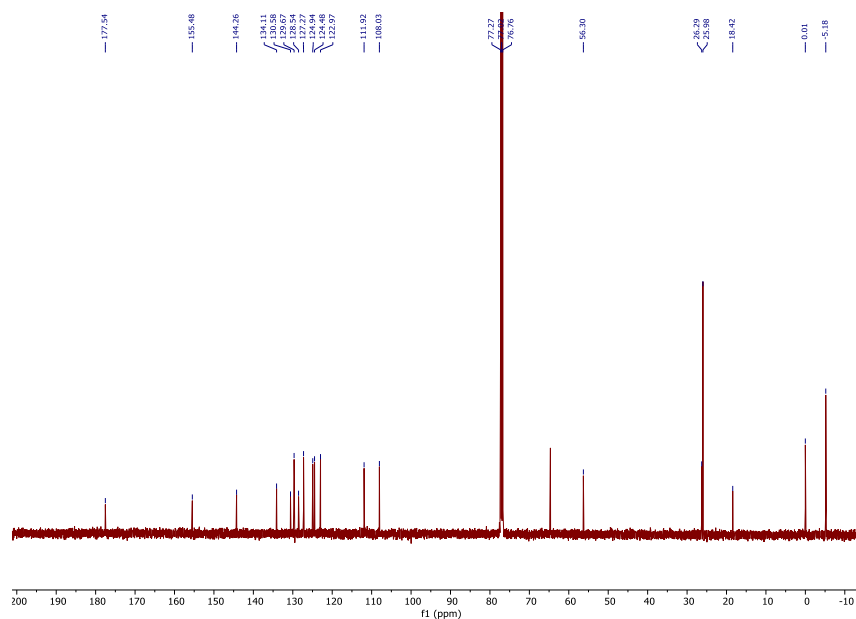

<sup>13</sup>C NMR (100 MHz, CDCl<sub>3</sub>) of compound (±)-**13e**

## Display Report

## Analysis Info

Analysis Name D:\Data\NEW USER DATA 2017\2018\OCTOBER 2018\05 oct18\Dr A  
 Method Bruker Compass 022-SM\_1-B,5\_01\_3692.d Dr A  
 Sample Name Dr A Bisai-AB-KNB-04-022-SM Instrument RUCHI  
 Comment micrOTOF-Q II 10330

## Acquisition Parameter

|             |          |                       |           |                  |           |
|-------------|----------|-----------------------|-----------|------------------|-----------|
| Source Type | ESI      | Ion Polarity          | Positive  | Set Nebulizer    | 1.2 Bar   |
| Focus       | Active   | Set Capillary         | 4500 V    | Set Dry Heater   | 200 °C    |
| Scan Begin  | 50 m/z   | Set End Plate Offset  | -500 V    | Set Dry Gas      | 7.0 l/min |
| Scan End    | 3000 m/z | Set Collision Cell RF | 130.0 Vpp | Set Divert Valve | Waste     |

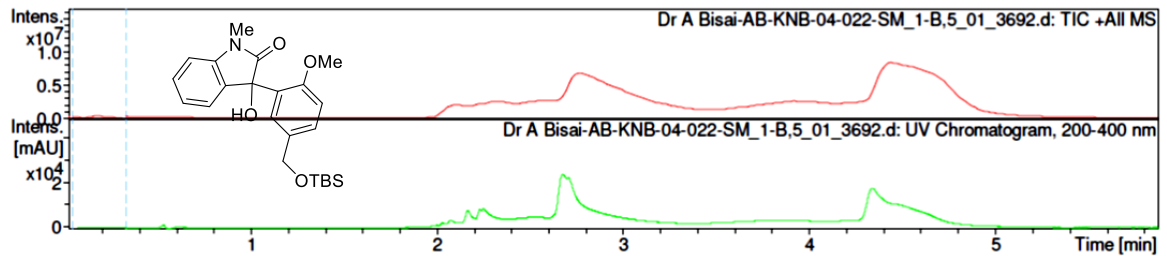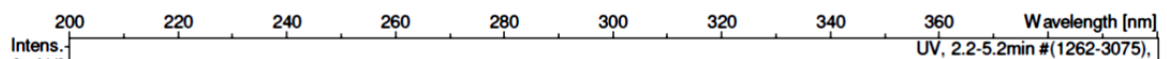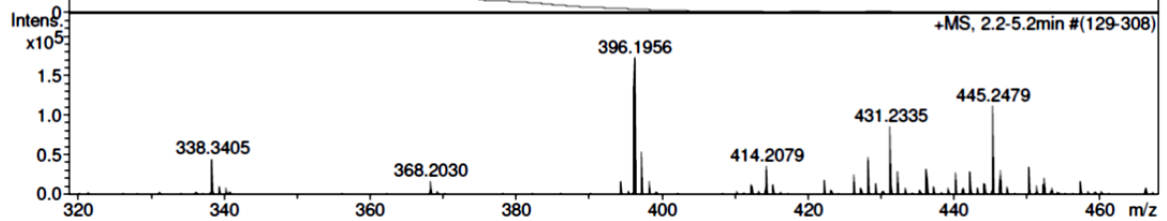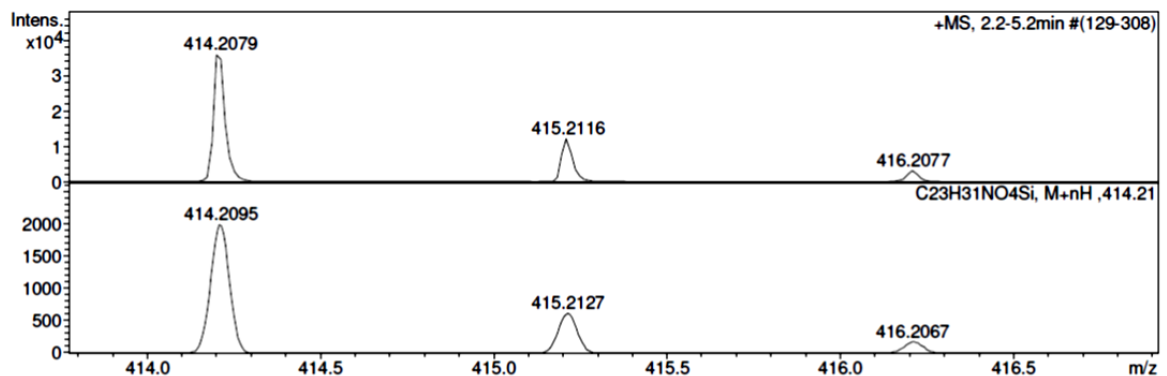

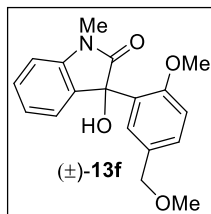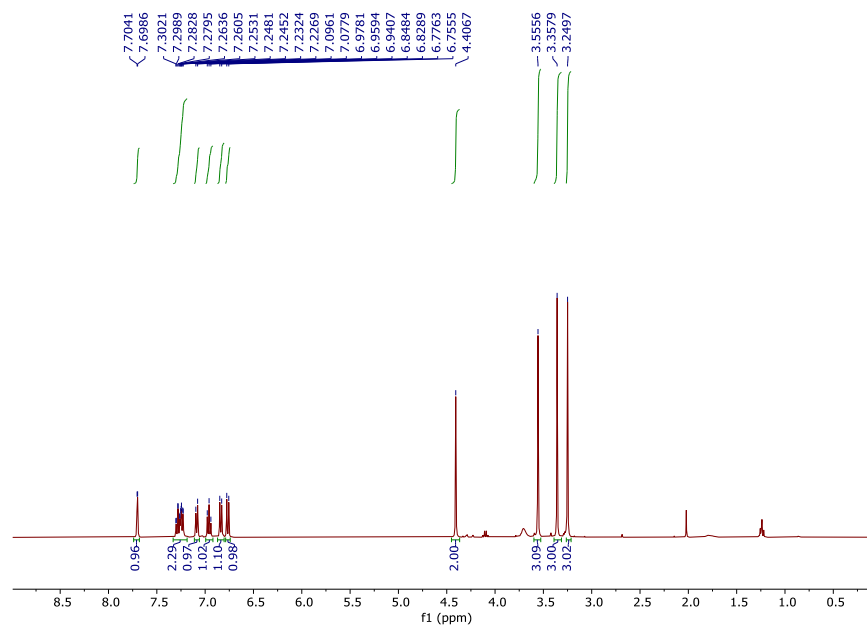

<sup>1</sup>H NMR (400 MHz, CDCl<sub>3</sub>) of compound (±)-**13f**

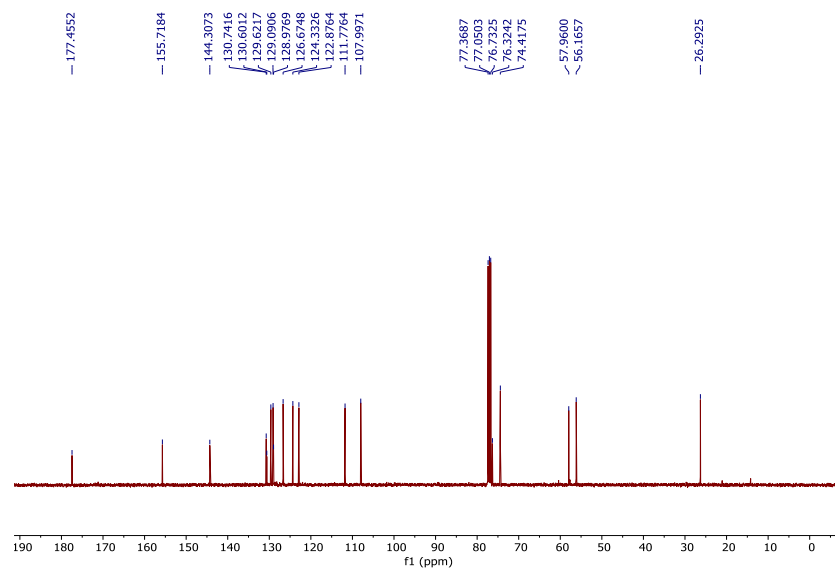

<sup>13</sup>C NMR (100 MHz, CDCl<sub>3</sub>) of compound (±)-**13f**

## Display Report

## Analysis Info

Analysis Name D:\Data\NEW USER DATA 2017\2018\OCTOBER 2018\05 oct\Dr A Bisai-AB-KNB-04-028\_1-B,6\_01\_3693.d  
 Method hrlcms-20 sept.m  
 Sample Name Dr A Bisai-AB-KNB-04-028  
 Comment

Acquisition Date 10/5/2018 1:08:19 PM

Operator RUCHI

Instrument micrOTOF-Q II 10330

## Acquisition Parameter

|             |          |                       |           |                  |           |
|-------------|----------|-----------------------|-----------|------------------|-----------|
| Source Type | ESI      | Ion Polarity          | Positive  | Set Nebulizer    | 1.2 Bar   |
| Focus       | Active   | Set Capillary         | 4500 V    | Set Dry Heater   | 200 °C    |
| Scan Begin  | 50 m/z   | Set End Plate Offset  | -500 V    | Set Dry Gas      | 7.0 l/min |
| Scan End    | 3000 m/z | Set Collision Cell RF | 130.0 Vpp | Set Divert Valve | Waste     |

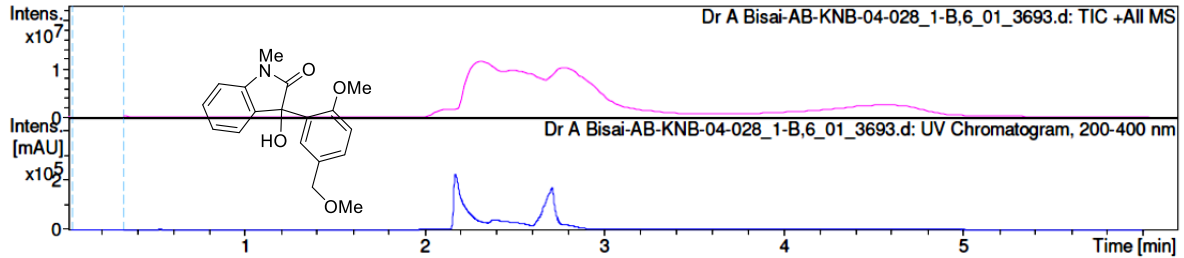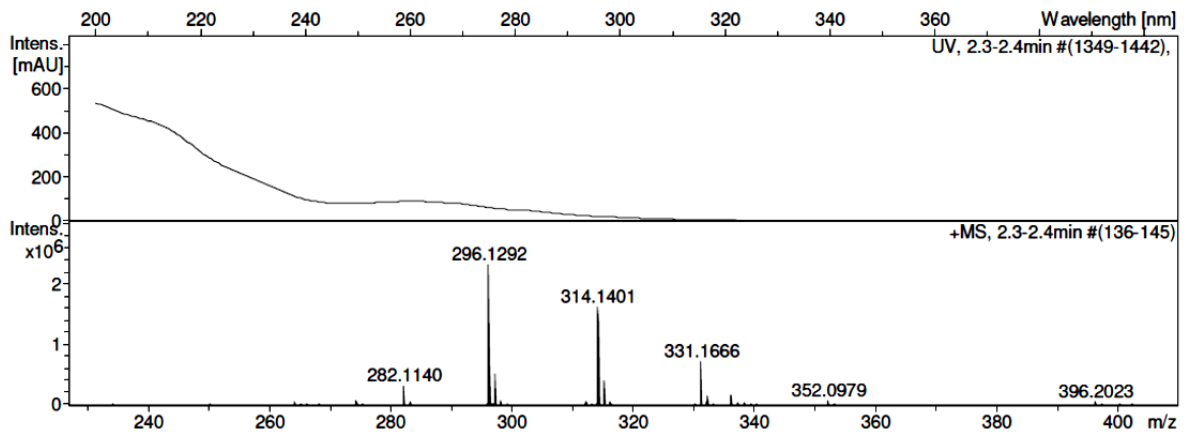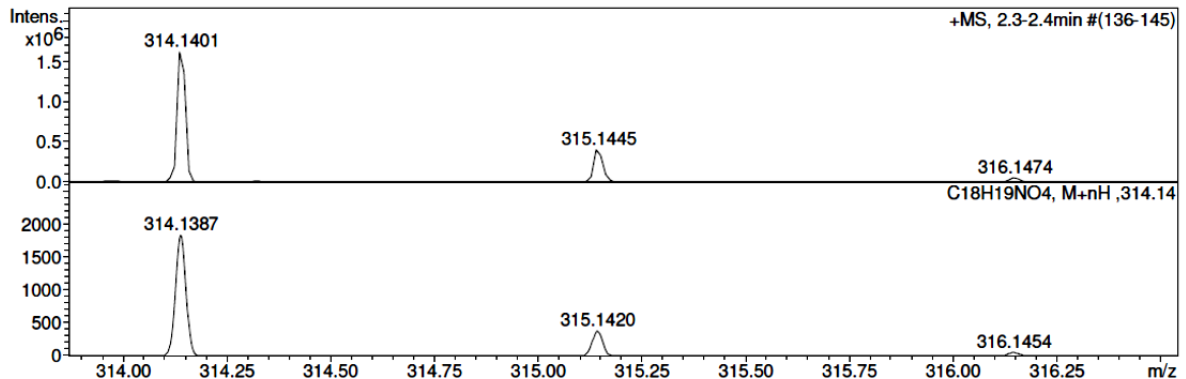

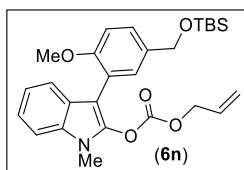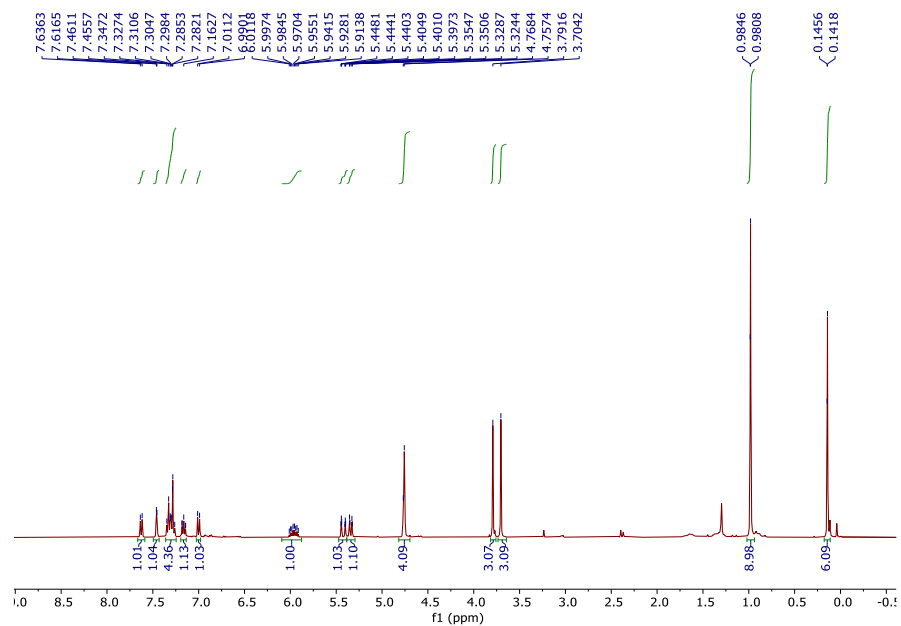

$^1\text{H}$  NMR (400 MHz,  $\text{CDCl}_3$ ) of compound **6n**

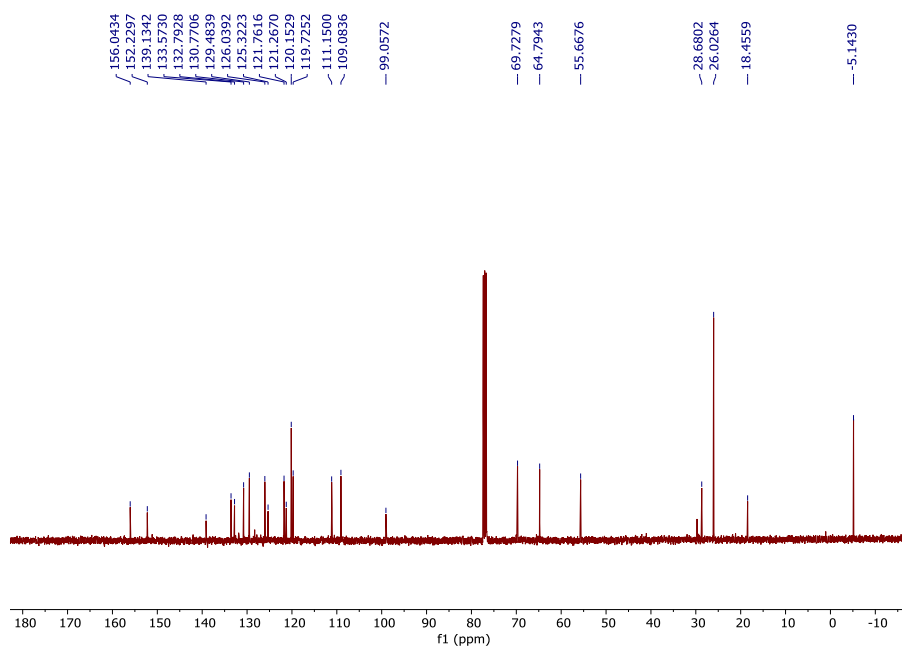

$^{13}\text{C}$  NMR (100 MHz,  $\text{CDCl}_3$ ) of compound **6n**

## Display Report

## Analysis Info

Analysis Name D:\Data\NEW USER DATA 2017\2018\May-2018\08-05-2018\Dr A Bisai-KNB-04-036\_1-A,3\_01\_1616.d  
 Method hrlcms-20 sept.m  
 Sample Name Dr A Bisai-KNB-04-036  
 Comment

Acquisition Date 5/8/2018 10:55:32 AM  
 Operator RUCHI  
 Instrument micrOTOF-Q II 10330

## Acquisition Parameter

|             |          |                       |           |                  |           |
|-------------|----------|-----------------------|-----------|------------------|-----------|
| Source Type | ESI      | Ion Polarity          | Positive  | Set Nebulizer    | 1.2 Bar   |
| Focus       | Active   | Set Capillary         | 4500 V    | Set Dry Heater   | 200 °C    |
| Scan Begin  | 50 m/z   | Set End Plate Offset  | -500 V    | Set Dry Gas      | 7.0 l/min |
| Scan End    | 3000 m/z | Set Collision Cell RF | 130.0 Vpp | Set Divert Valve | Waste     |

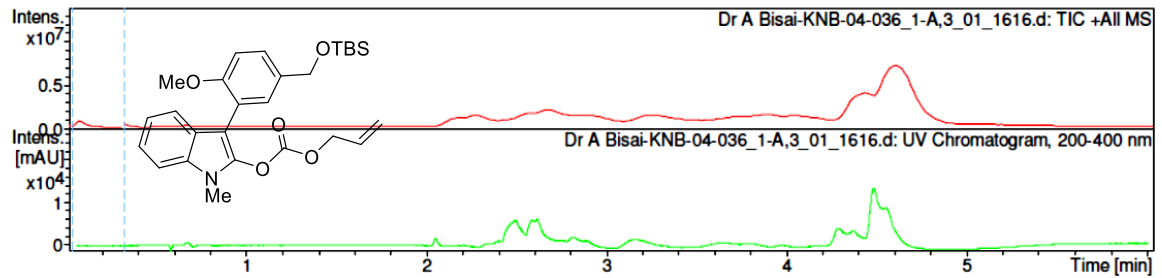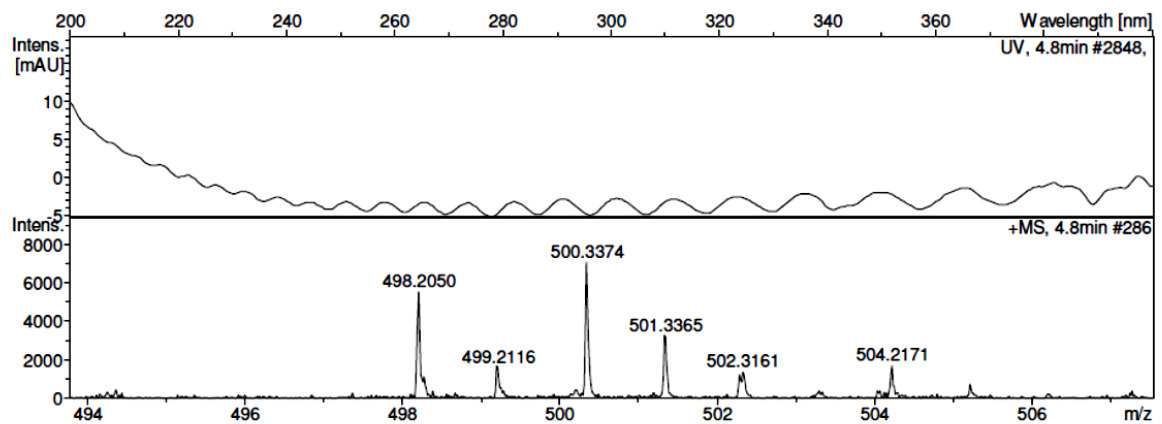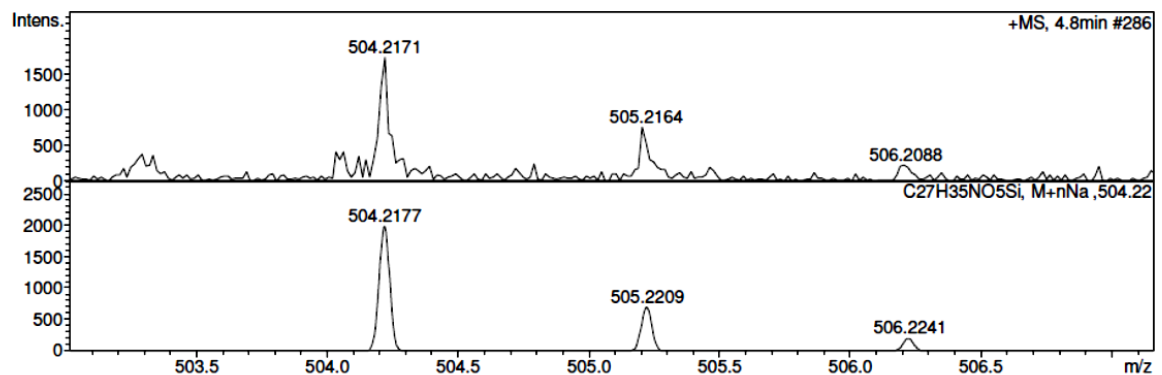

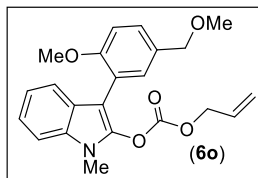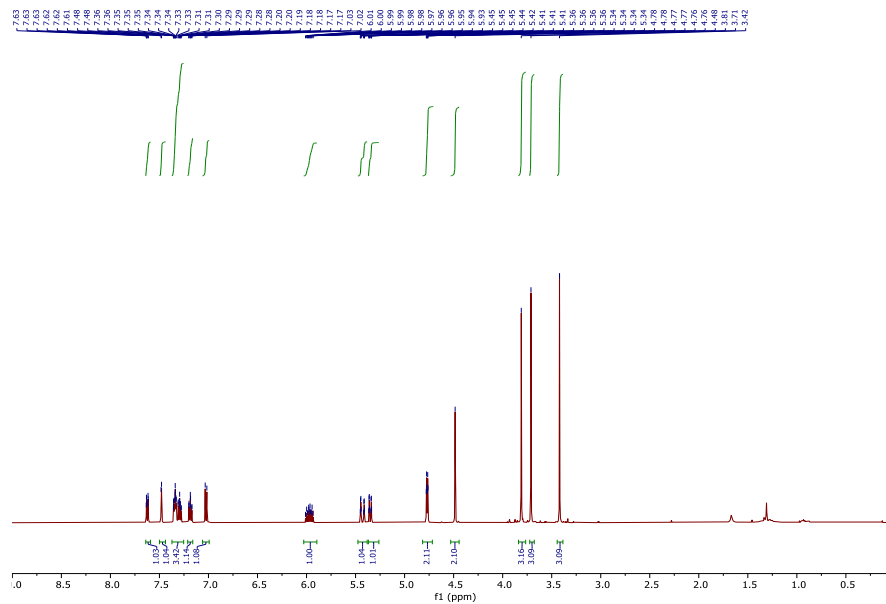

$^1\text{H}$  NMR (500 MHz,  $\text{CDCl}_3$ ) of compound **60**

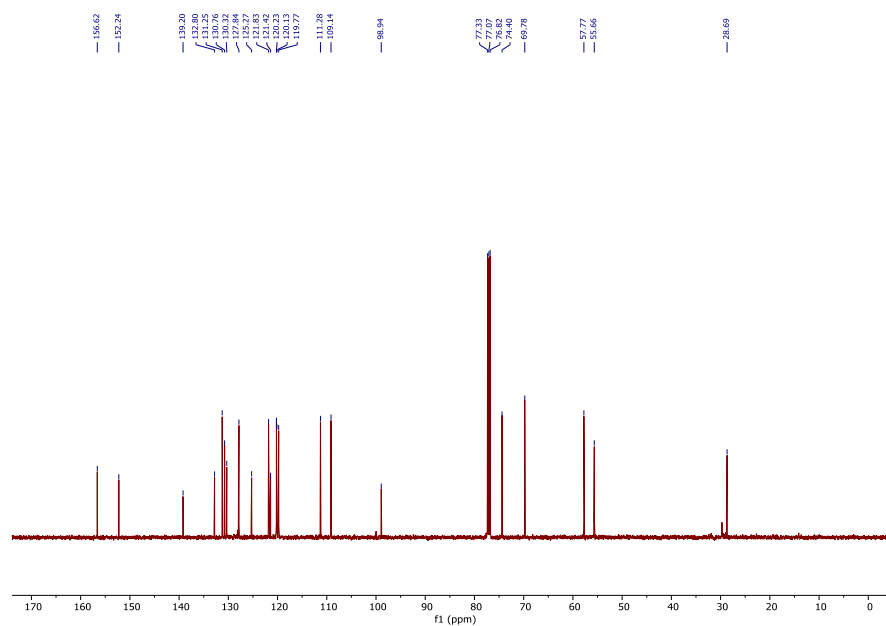

$^{13}\text{C}$  NMR (125 MHz,  $\text{CDCl}_3$ ) of compound **60**

## Display Report

## Analysis Info

Analysis Name D:\Data\NEW USER DATA 2017\2018\May-2018\08-05-2018\Dr A Bisai-KNB-04-034-R\_1-A,2\_01\_1615.d  
Method hrlcms-20 sept.m  
Sample Name Dr A Bisai-KNB-04-034-R  
Comment

Acquisition Date 5/8/2018 10:48:22 AM

Operator RUCHI

Instrument micrOTOF-Q II 10330

## Acquisition Parameter

|             |          |                       |           |                  |           |
|-------------|----------|-----------------------|-----------|------------------|-----------|
| Source Type | ESI      | Ion Polarity          | Positive  | Set Nebulizer    | 1.2 Bar   |
| Focus       | Active   | Set Capillary         | 4500 V    | Set Dry Heater   | 200 °C    |
| Scan Begin  | 50 m/z   | Set End Plate Offset  | -500 V    | Set Dry Gas      | 7.0 l/min |
| Scan End    | 3000 m/z | Set Collision Cell RF | 130.0 Vpp | Set Divert Valve | Waste     |

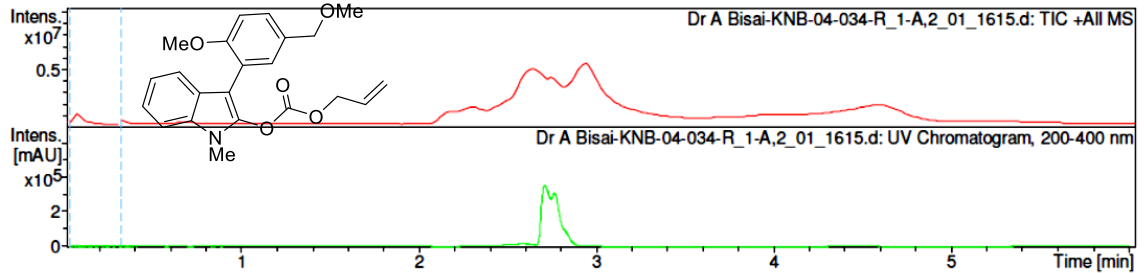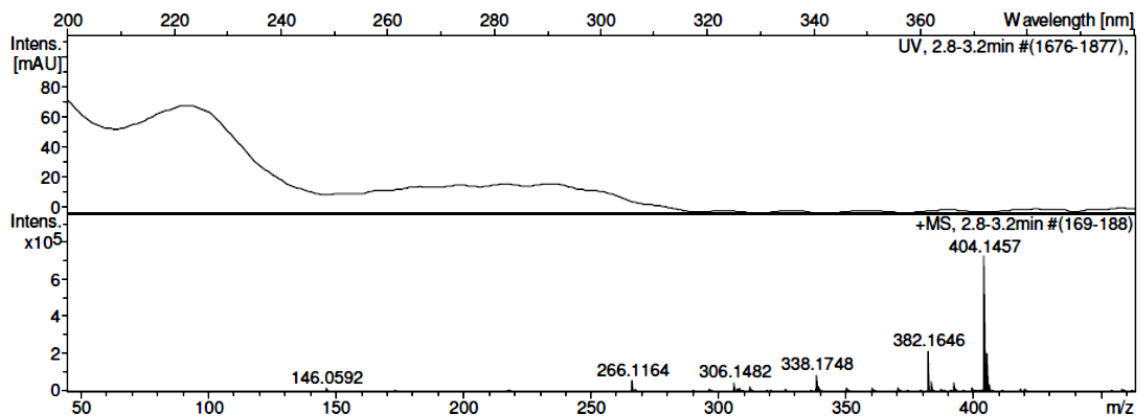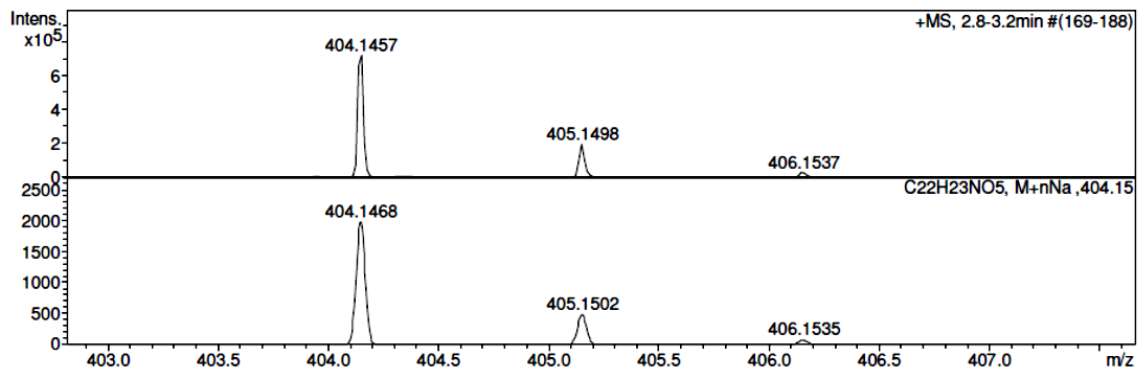



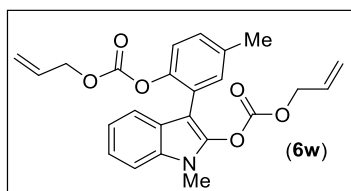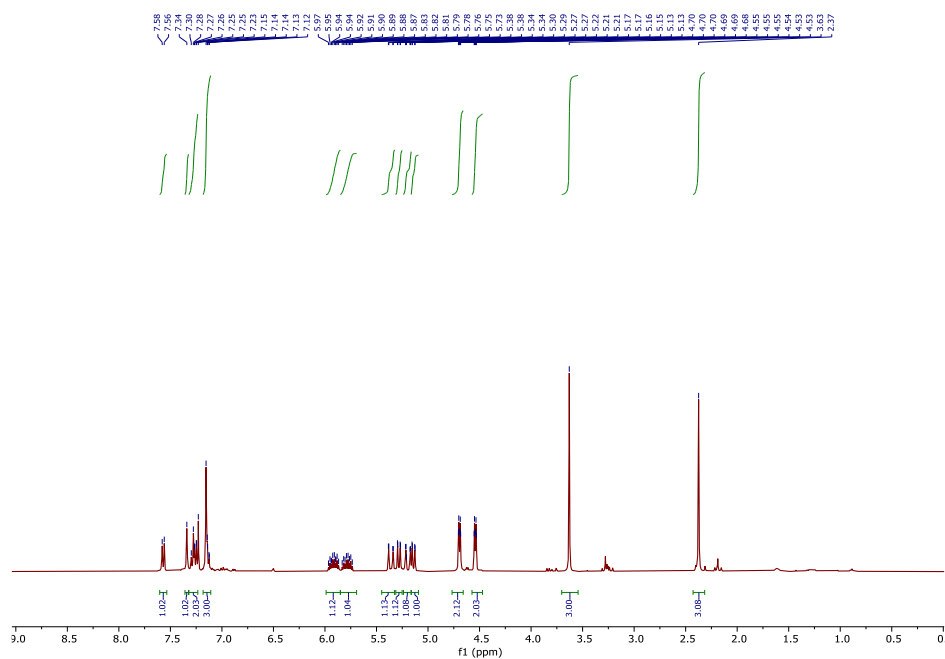

$^1\text{H}$  NMR (400 MHz,  $\text{CDCl}_3$ ) of compound **6w**

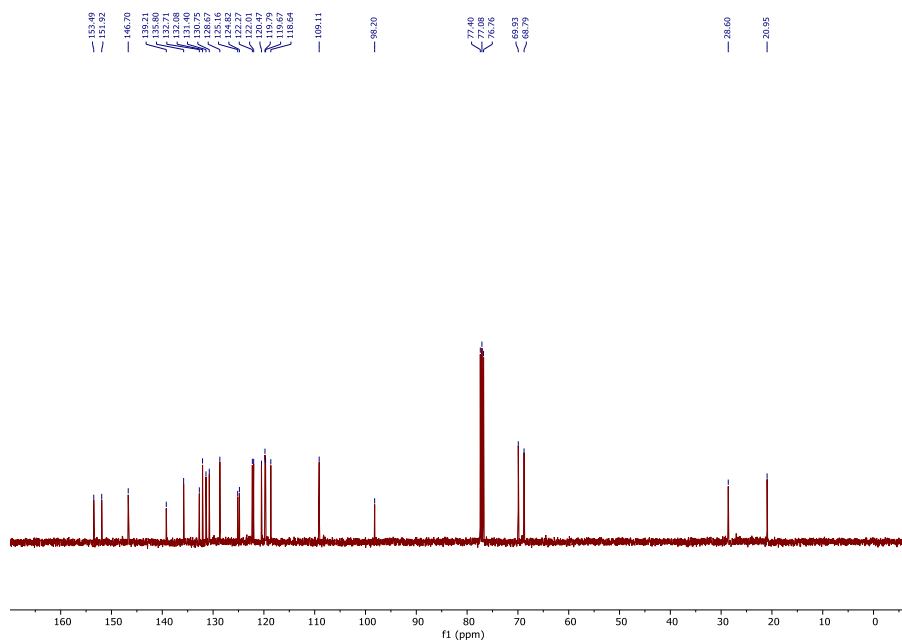

$^{13}\text{C}$  NMR (100 MHz,  $\text{CDCl}_3$ ) of compound **6w**

## Display Report

|                      |                                                                                              |                  |                       |
|----------------------|----------------------------------------------------------------------------------------------|------------------|-----------------------|
| <b>Analysis Info</b> |                                                                                              | Acquisition Date | 10/5/2018 12:53:59 PM |
| Analysis Name        | D:\Data\NEW USER DATA 2017\2018\OCTOBER 2018\05 oct\Dr A Bisai-AB-KNB-04-122_1-B,4_01_3691.d | Operator         | RUCHI                 |
| Method               | hrlcms-20 sept.m                                                                             | Instrument       | micrOTOF-Q II 10330   |
| Sample Name          | Dr A Bisai-AB-KNB-04-122                                                                     |                  |                       |
| Comment              |                                                                                              |                  |                       |

## Acquisition Parameter

|             |          |                       |           |                  |           |
|-------------|----------|-----------------------|-----------|------------------|-----------|
| Source Type | ESI      | Ion Polarity          | Positive  | Set Nebulizer    | 1.2 Bar   |
| Focus       | Active   | Set Capillary         | 4500 V    | Set Dry Heater   | 200 °C    |
| Scan Begin  | 50 m/z   | Set End Plate Offset  | -500 V    | Set Dry Gas      | 7.0 l/min |
| Scan End    | 3000 m/z | Set Collision Cell RF | 130.0 Vpp | Set Divert Valve | Waste     |

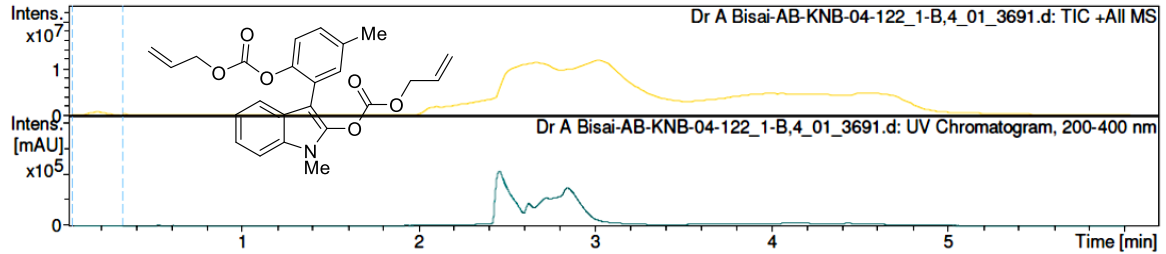

200 220 240 260 280 300 320 340 360 Wavelength [nm]

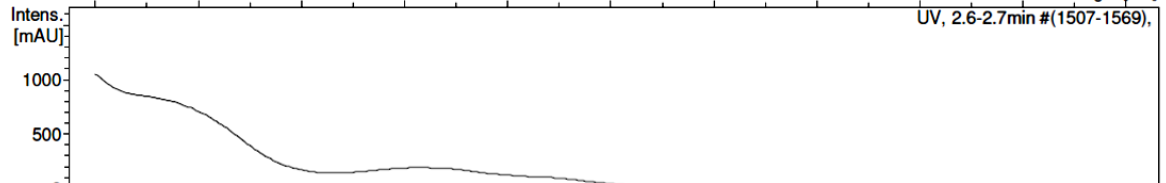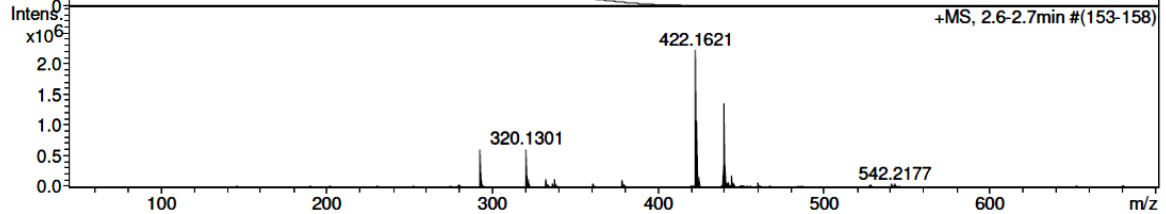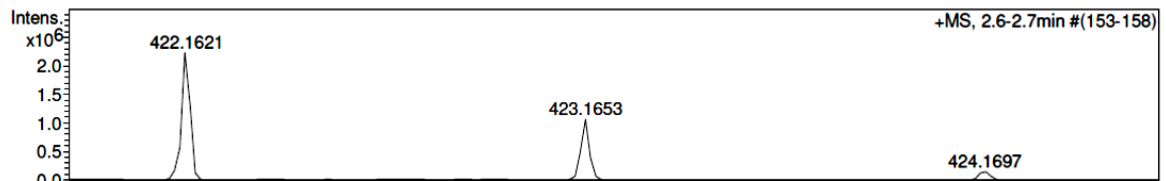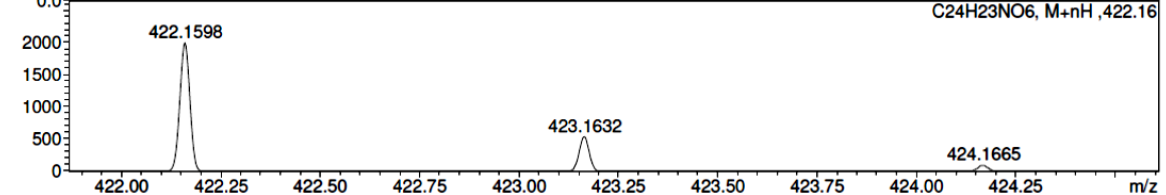

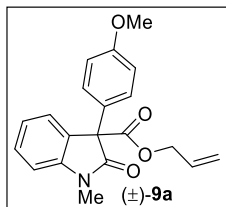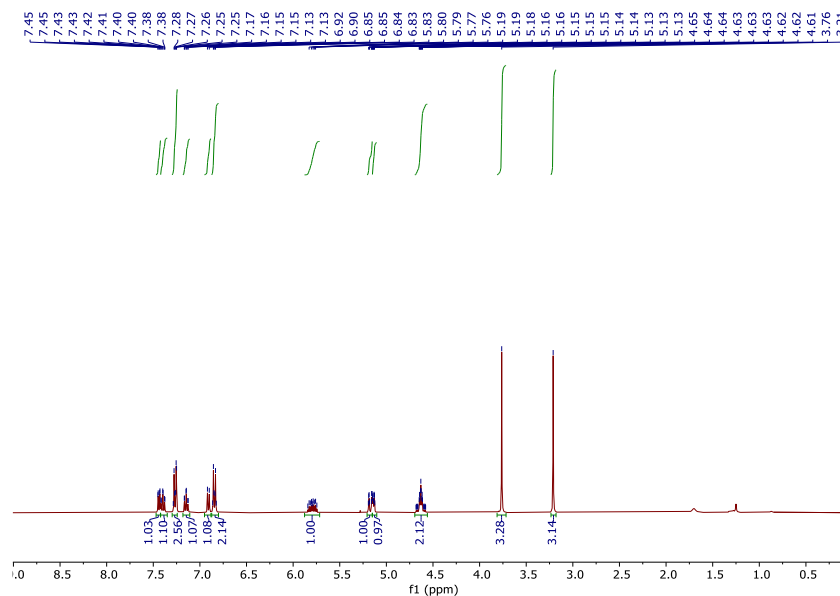

$^1\text{H}$  NMR (400 MHz,  $\text{CDCl}_3$ ) of compound (±)-9a

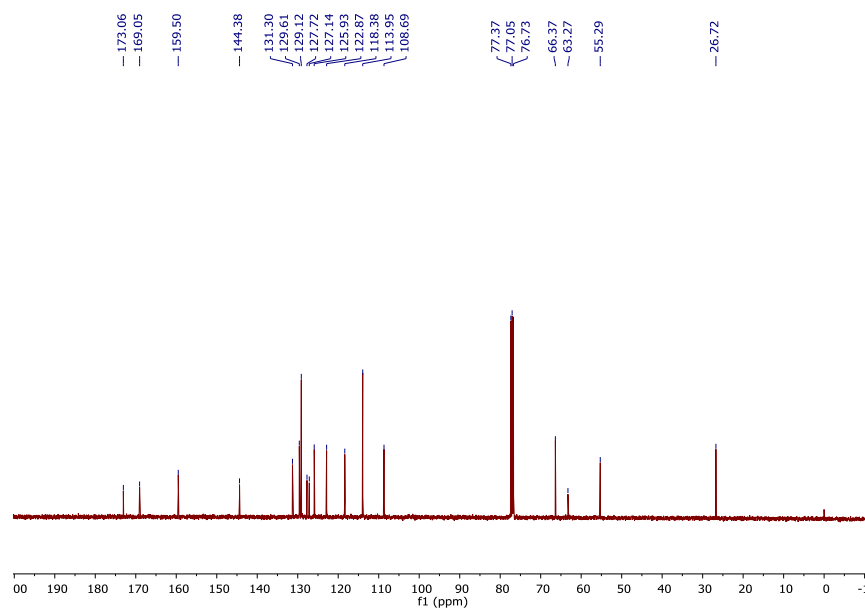

$^{13}\text{C}$  NMR (100 MHz,  $\text{CDCl}_3$ ) of compound (±)-9a

## Display Report

## Analysis Info

Analysis Name D:\Data\NEW USER DATA 2017\2018\JULY-2018\06-07-2018\Dr A Bisai-KNB-05-093-R\_1-A,8\_01\_2591.d  
 Method hrlcms-20 sept.m  
 Sample Name Dr A Bisai-KNB-05-093-R  
 Comment

Acquisition Date 7/6/2018 12:26:18 PM

Operator RUCHI

Instrument micrOTOF-Q II 10330

## Acquisition Parameter

|             |          |                       |           |                  |           |
|-------------|----------|-----------------------|-----------|------------------|-----------|
| Source Type | ESI      | Ion Polarity          | Positive  | Set Nebulizer    | 1.2 Bar   |
| Focus       | Active   | Set Capillary         | 4500 V    | Set Dry Heater   | 200 °C    |
| Scan Begin  | 50 m/z   | Set End Plate Offset  | -500 V    | Set Dry Gas      | 7.0 l/min |
| Scan End    | 3000 m/z | Set Collision Cell RF | 130.0 Vpp | Set Divert Valve | Waste     |

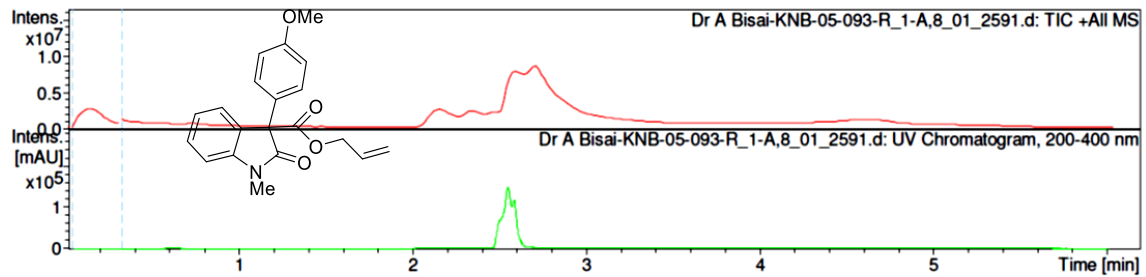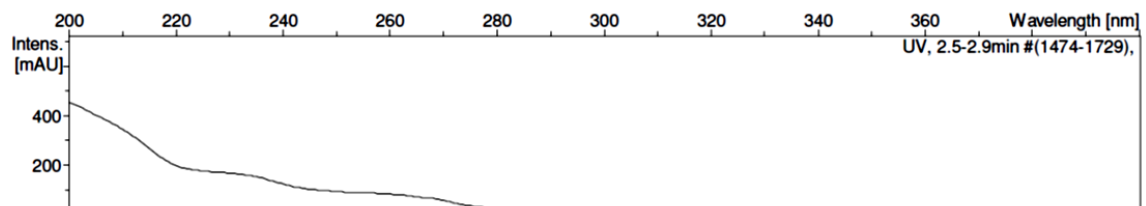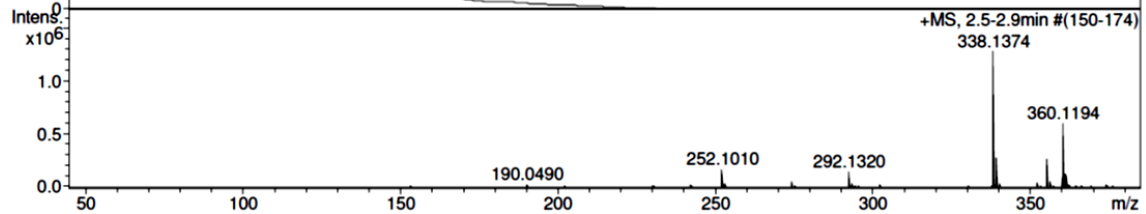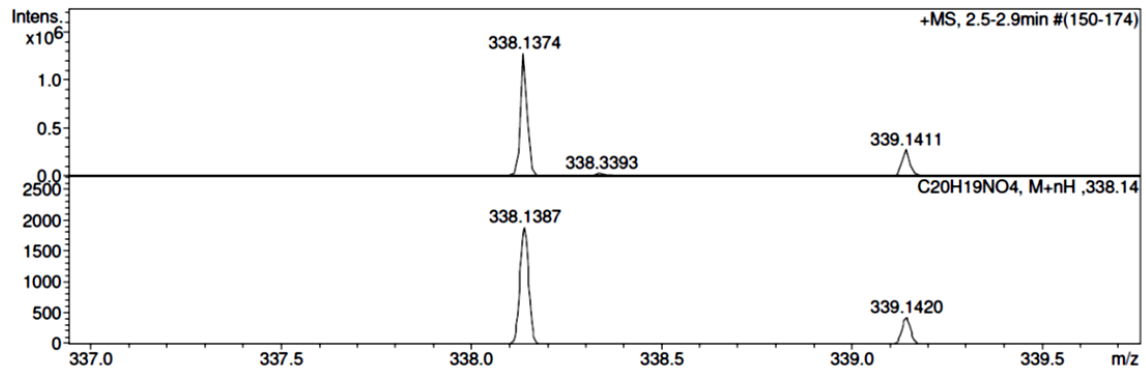Scanned copy of mass spectrum of **9a**

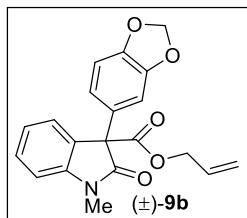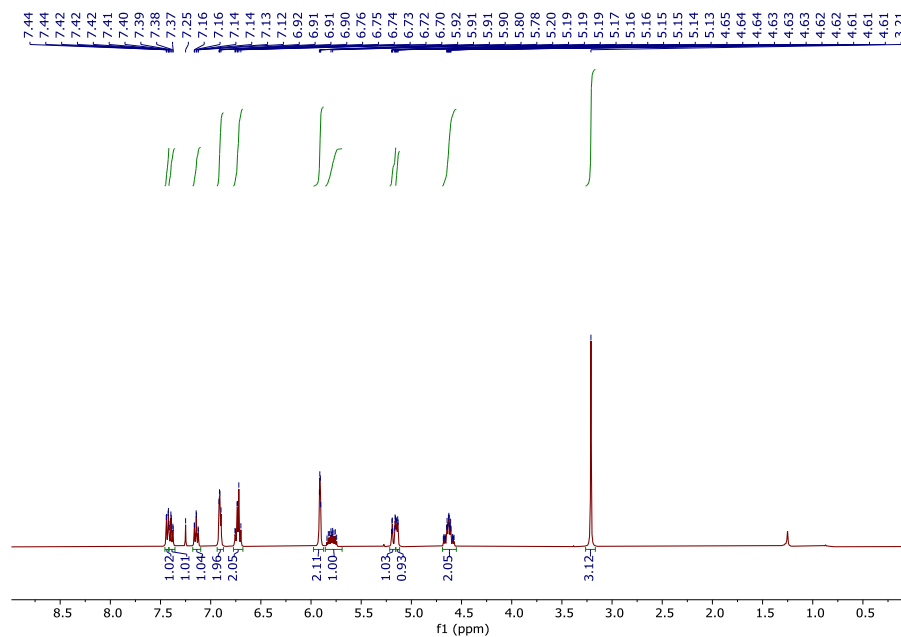

$^1\text{H}$  NMR (400 MHz,  $\text{CDCl}_3$ ) of compound (±)-**9b**

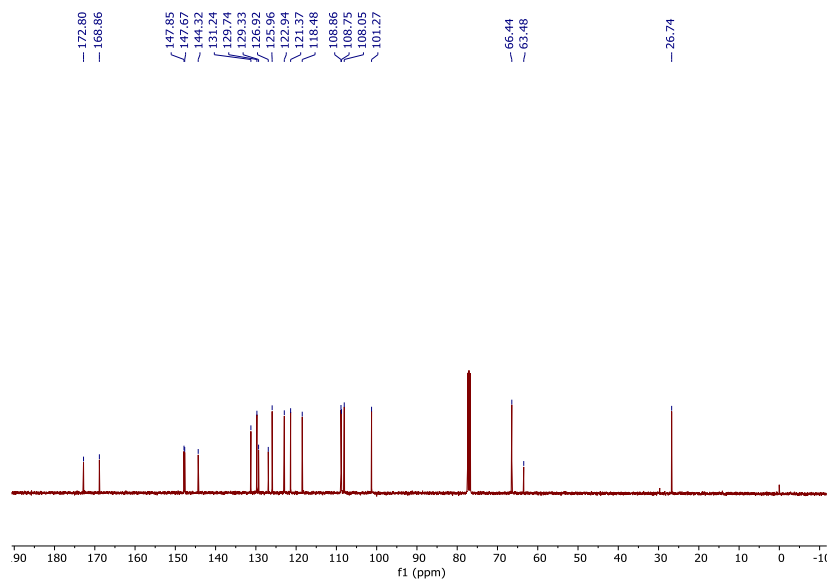

$^{13}\text{C}$  NMR (100 MHz,  $\text{CDCl}_3$ ) of compound (±)-**9b**

## Display Report

## Analysis Info

Analysis Name D:\Data\NEW USER DATA 2017\2018\JULY-2018\06-07-2018\Dr A Bisai-KNB-05-90-R\_1-A,7\_01\_2590.d  
 Method hrlcms-20 sept.m  
 Sample Name Dr A Bisai-KNB-05-90-R  
 Comment

Acquisition Date 7/6/2018 12:19:07 PM

Operator RUCHI

Instrument micrOTOF-Q II 10330

## Acquisition Parameter

|             |          |                       |           |                  |           |
|-------------|----------|-----------------------|-----------|------------------|-----------|
| Source Type | ESI      | Ion Polarity          | Positive  | Set Nebulizer    | 1.2 Bar   |
| Focus       | Active   | Set Capillary         | 4500 V    | Set Dry Heater   | 200 °C    |
| Scan Begin  | 50 m/z   | Set End Plate Offset  | -500 V    | Set Dry Gas      | 7.0 l/min |
| Scan End    | 3000 m/z | Set Collision Cell RF | 130.0 Vpp | Set Divert Valve | Waste     |

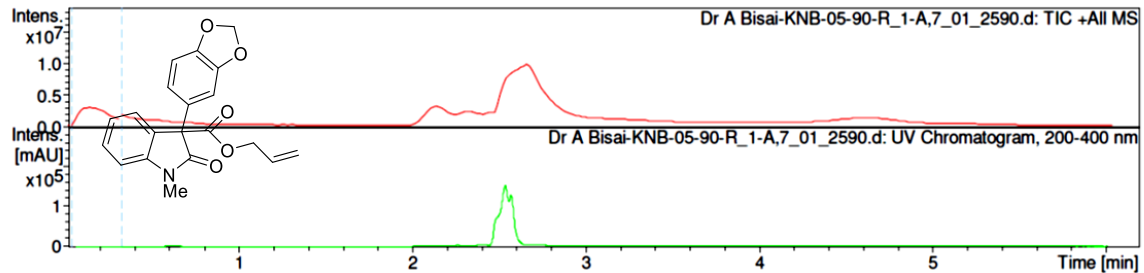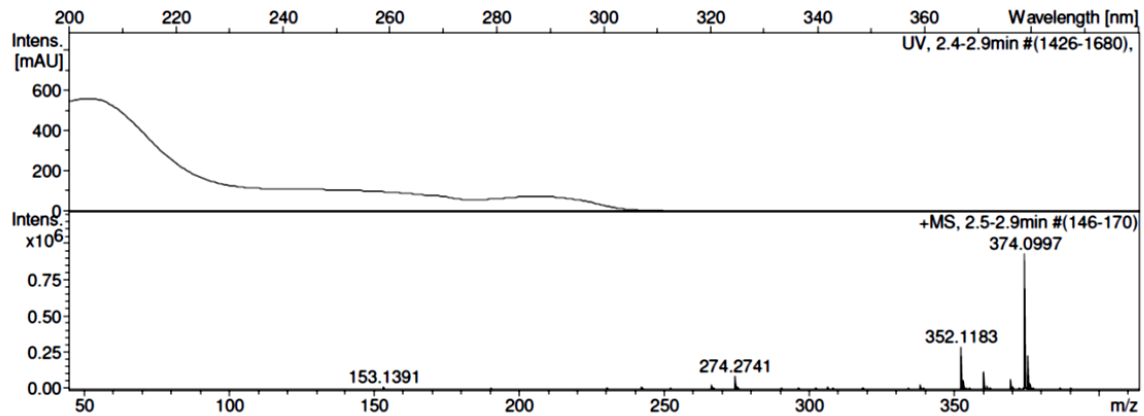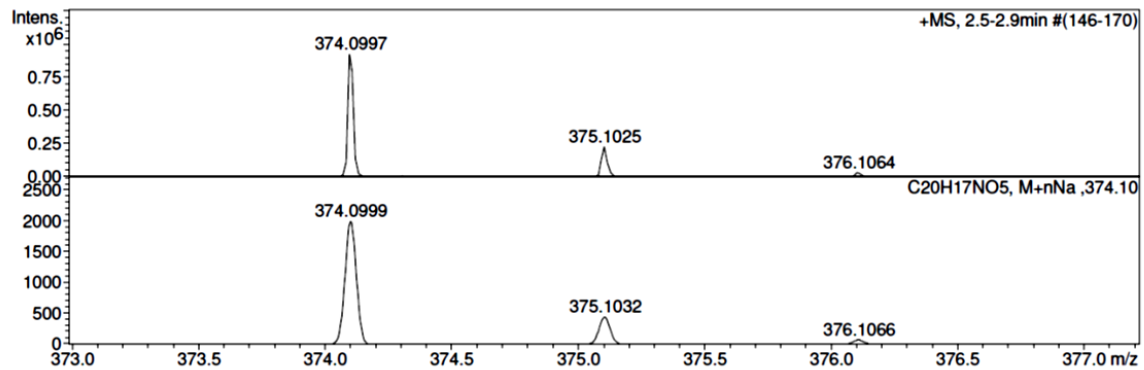Scanned copy of mass spectrum of **9b**

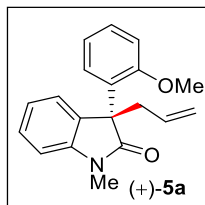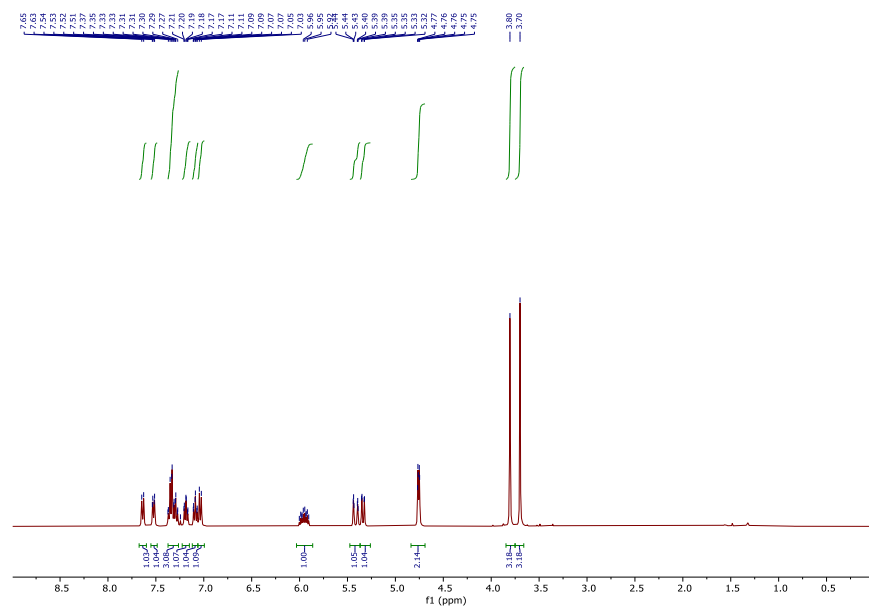

$^1\text{H}$  NMR (400 MHz,  $\text{CDCl}_3$ ) of compound (+)-**5a**

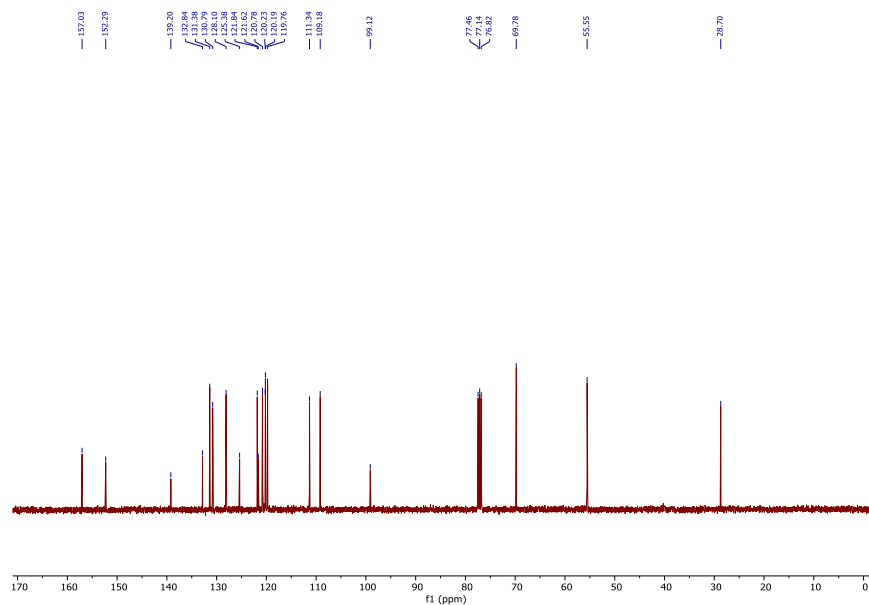

$^{13}\text{C}$  NMR (100 MHz,  $\text{CDCl}_3$ ) of compound (+)-**5a**

## Display Report

## Analysis Info

Analysis Name D:\Data\User data\2021\NOV\lab\_sp\_02033.d  
Method Tune\_pos\_Standard.m  
Sample Name ab\_sp\_02033  
Comment

Acquisition Date 11/22/2021 11:42:20 AM  
Operator IISER Kolkata  
Instrument maXis impact 8282001.00127

## Acquisition Parameter

|             |          |                      |          |                  |           |
|-------------|----------|----------------------|----------|------------------|-----------|
| Source Type | ESI      | Ion Polarity         | Positive | Set Nebulizer    | 0.5 Bar   |
| Focus       | Active   | Set Capillary        | 3400 V   | Set Dry Heater   | 200 °C    |
| Scan Begin  | 50 m/z   | Set End Plate Offset | -500 V   | Set Dry Gas      | 4.0 l/min |
| Scan End    | 1000 m/z | Set Charging Voltage | 2000 V   | Set Divert Valve | Source    |
|             |          | Set Corona           | 0 nA     | Set APCI Heater  | 0 °C      |

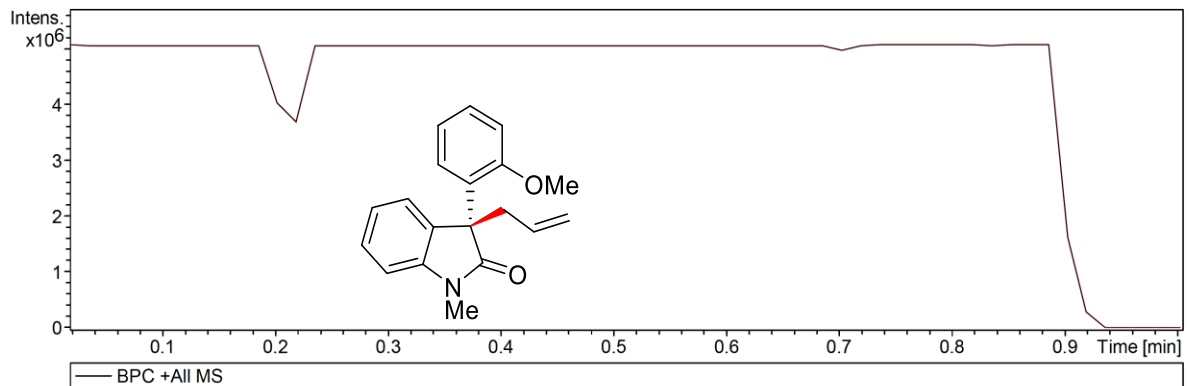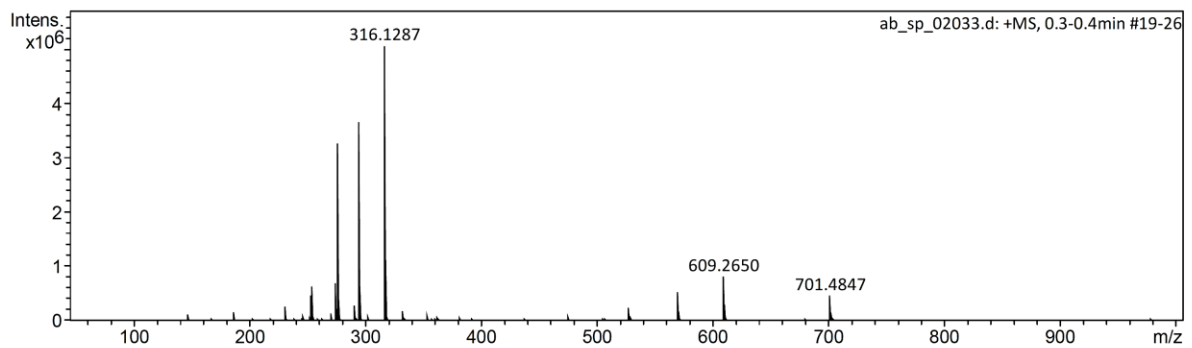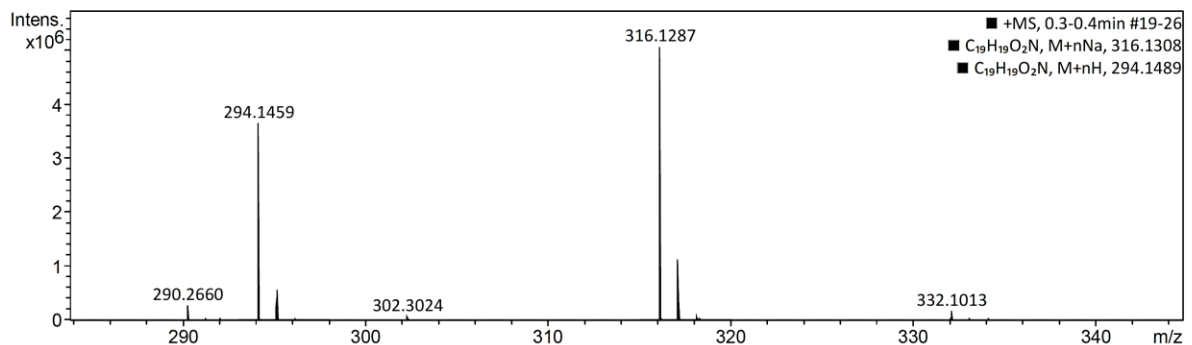

ab\_sp\_02033.d

Bruker Compass DataAnalysis 4.1

printed: 11/22/2021 11:45:45 AM

by: IISER Kolkata

Page 1 of 1

Scanned copy of mass spectrum of **5a**



Data File C:\CHEM32\1\DATA\SAIKAT\2013-12-24AB-SC-01-194-IB-5-254-1-30.D  
 Sample Name: AB-SC-01-194-IB-5-254-1-30

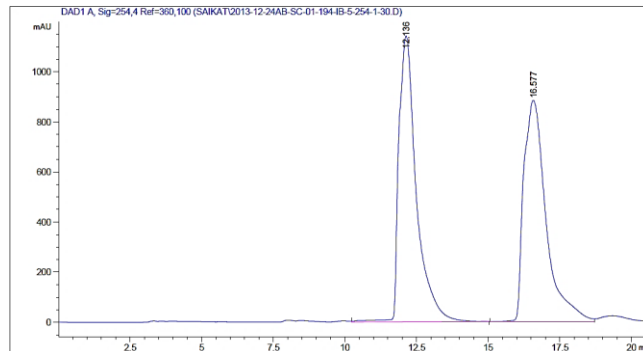

Signal 1: DAD1 A, Sig=254,4 Ref=360,100

| Peak # | RetTime [min] | Type | Width [min] | Area [mAU*s] | Height [mAU] | Area %  |
|--------|---------------|------|-------------|--------------|--------------|---------|
| 1      | 12.136        | VB   | 0.5896      | 4.82314e4    | 1140.05469   | 50.2433 |
| 2      | 16.577        | BV   | 0.7634      | 4.77643e4    | 882.53760    | 49.7567 |

Totals : 9.59957e4 2022.59229

\*\*\* End of Report \*\*\*

### HPLC data of (±)-5a

Data File C:\CHEM32\1\DATA\SAIKAT\2013-12-25AB-SC-01-201-IB-5-254-1-30.D  
 Sample Name: AB-SC-01-201-IB-5-254-1-30

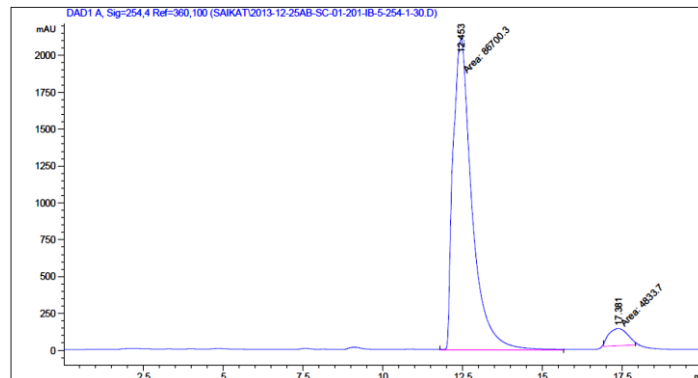

Signal 1: DAD1 A, Sig=254,4 Ref=360,100

| Peak # | RetTime [min] | Type | Width [min] | Area [mAU*s] | Height [mAU] | Area %  |
|--------|---------------|------|-------------|--------------|--------------|---------|
| 1      | 12.453        | MM   | 0.6864      | 8.67003e4    | 2105.13916   | 94.7192 |
| 2      | 17.381        | MM   | 0.6852      | 4833.70459   | 117.57524    | 5.2808  |

Totals : 9.15340e4 2222.71440

\*\*\* End of Report \*\*\*

### HPLC data of (+)-5a

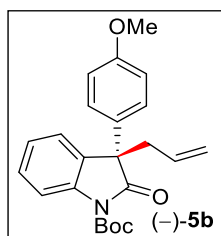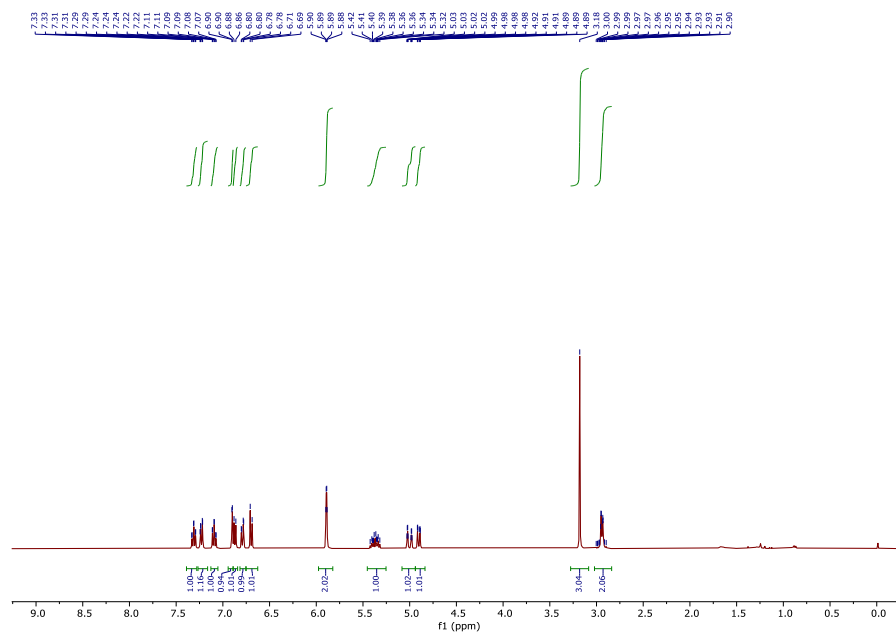

$^1\text{H}$  NMR (400 MHz,  $\text{CDCl}_3$ ) of compound **(-)-5b**

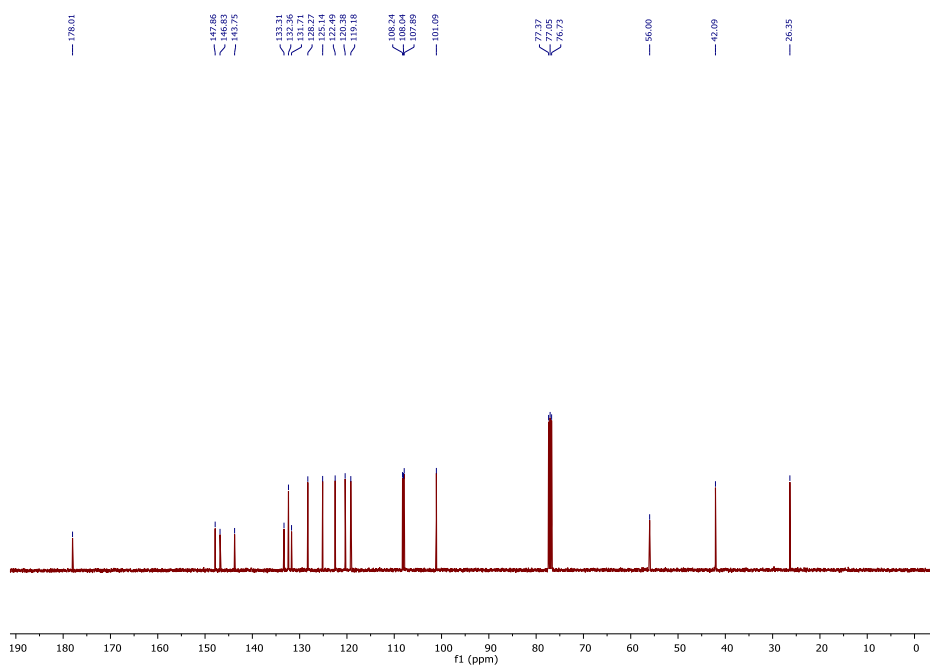

$^{13}\text{C}$  NMR (100 MHz,  $\text{CDCl}_3$ ) of compound **(-)-5b**

## Display Report

## Analysis Info

Analysis Name D:\Data\user data\2017\JUNE 2017\15 june\Dr A Bisai-AB-KNB-04-115\_1-B,8\_01\_2106.d Acquisition Date 6/15/2017 2:42:47 PM  
 Method hrlcms\_pos\_mid\_tunemix.m Operator RUCHI SHRIVASTAVA  
 Sample Name Dr A Bisai-AB-KNB-04-115 Instrument microTOF-Q II 10330  
 Comment

## Acquisition Parameter

|             |          |                       |           |                  |           |
|-------------|----------|-----------------------|-----------|------------------|-----------|
| Source Type | ESI      | Ion Polarity          | Positive  | Set Nebulizer    | 0.3 Bar   |
| Focus       | Active   | Set Capillary         | 4500 V    | Set Dry Heater   | 200 °C    |
| Scan Begin  | 50 m/z   | Set End Plate Offset  | -500 V    | Set Dry Gas      | 4.0 l/min |
| Scan End    | 3000 m/z | Set Collision Cell RF | 450.0 Vpp | Set Divert Valve | Waste     |

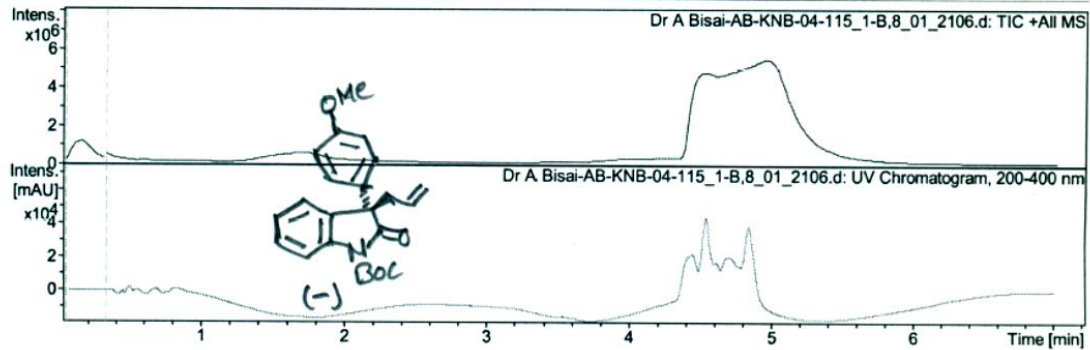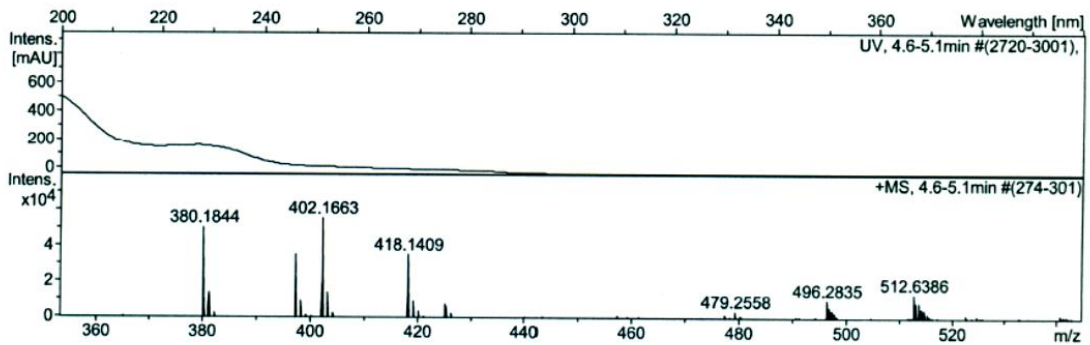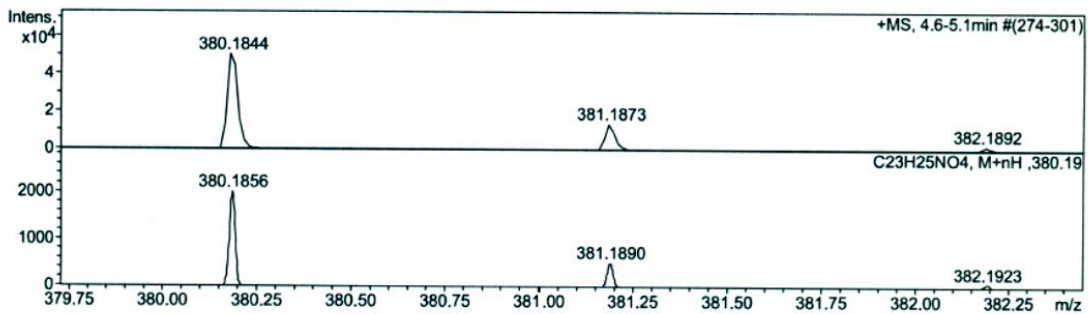Scanned copy of mass spectrum of **5b**

Data File C:\CHEM32\1\DATA\NARESH\2017-02-14AB-KNB-04-115-IC-3-20-1-254-50M.D  
 Sample Name: AB-KNB-04-115-IC-3-20-1-254-50M

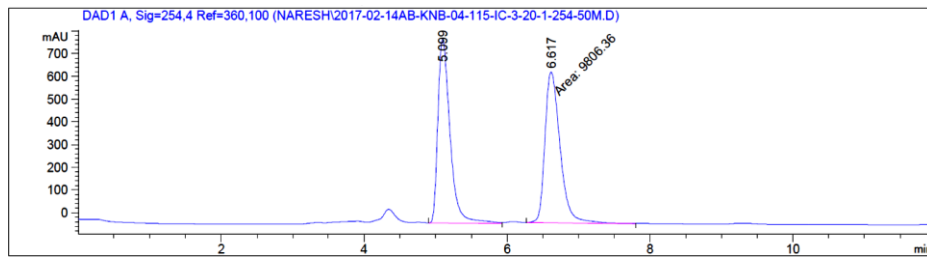

Signal 1: DAD1 A, Sig=254,4 Ref=360,100

| Peak # | RetTime [min] | Type | Width [min] | Area [mAU*s] | Height [mAU] | Area %  |
|--------|---------------|------|-------------|--------------|--------------|---------|
| 1      | 5.099         | BV   | 0.1822      | 9584.14258   | 808.81201    | 49.4270 |
| 2      | 6.617         | MM   | 0.2458      | 9806.36426   | 665.05725    | 50.5730 |

Totals : 1.93905e4 1473.86926

=====  
 \*\*\* End of Report \*\*\*

### HPLC data of (±)-5b

Data File C:\CHEM32\1\DATA\NARESH\2017-02-14AB-KNB-04-108-IC-3-20-1-254-50M.D  
 Sample Name: AB-KNB-04-108-IC-3-20-1-254-50M

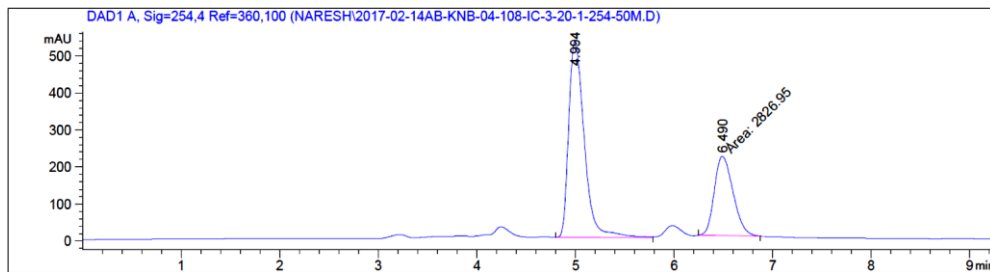

Signal 1: DAD1 A, Sig=254,4 Ref=360,100

| Peak # | RetTime [min] | Type | Width [min] | Area [mAU*s] | Height [mAU] | Area %  |
|--------|---------------|------|-------------|--------------|--------------|---------|
| 1      | 4.994         | BV   | 0.1727      | 5828.86377   | 528.29065    | 67.3404 |
| 2      | 6.490         | MM   | 0.2205      | 2826.95044   | 213.67680    | 32.6596 |

Totals : 8655.81421 741.96745

=====  
 \*\*\* End of Report \*\*\*

### HPLC data of (-)-5b

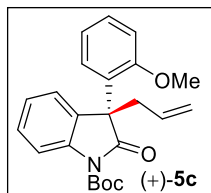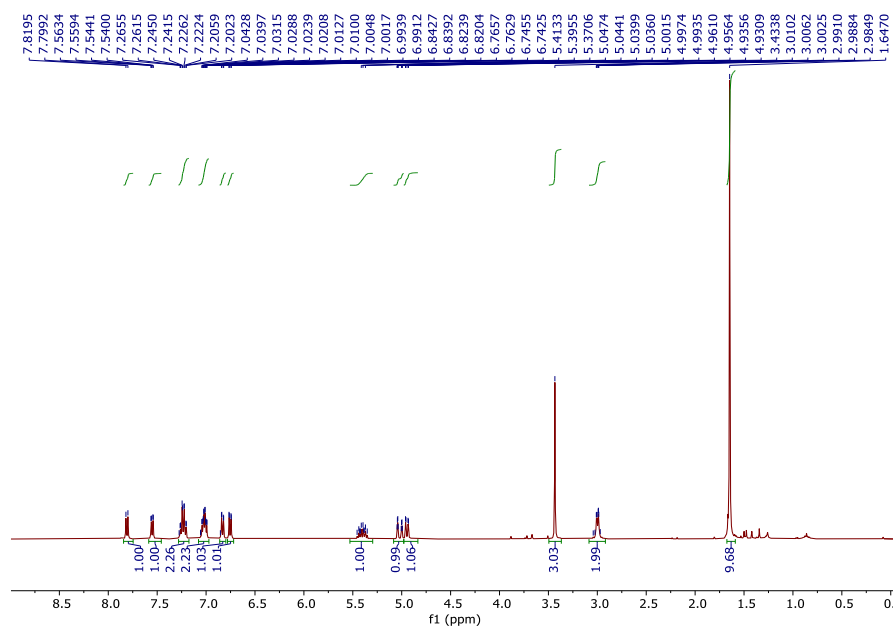

$^1\text{H}$  NMR (400 MHz,  $\text{CDCl}_3$ ) of compound (+)-**5c**

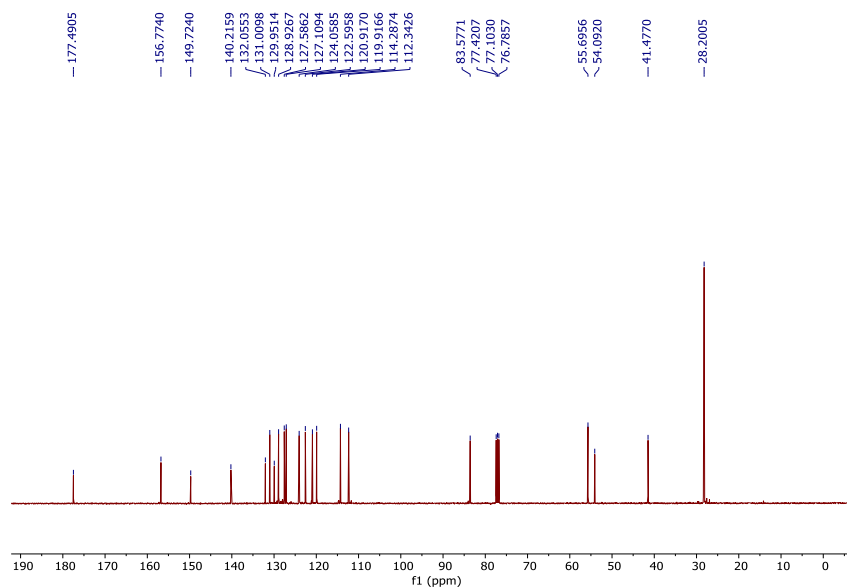

$^{13}\text{C}$  NMR (100 MHz,  $\text{CDCl}_3$ ) of compound (+)-**5c**

## Display Report

## Analysis Info

Analysis Name D:\Data\NEW USER DATA 2017\2018\27 mar\Dr A Bisai-KNB-03-197\_1-A,8\_01\_1410.d  
Method hrlcms-20 sept.m  
Sample Name Dr A Bisai-KNB-03-197  
Comment

Acquisition Date 3/27/2018 11:49:33 AM

Operator RUCHI

Instrument micrOTOF-Q II 10330

## Acquisition Parameter

|             |          |                       |           |                  |           |
|-------------|----------|-----------------------|-----------|------------------|-----------|
| Source Type | ESI      | Ion Polarity          | Positive  | Set Nebulizer    | 1.2 Bar   |
| Focus       | Active   | Set Capillary         | 4500 V    | Set Dry Heater   | 200 °C    |
| Scan Begin  | 50 m/z   | Set End Plate Offset  | -500 V    | Set Dry Gas      | 7.0 l/min |
| Scan End    | 3000 m/z | Set Collision Cell RF | 130.0 Vpp | Set Divert Valve | Waste     |

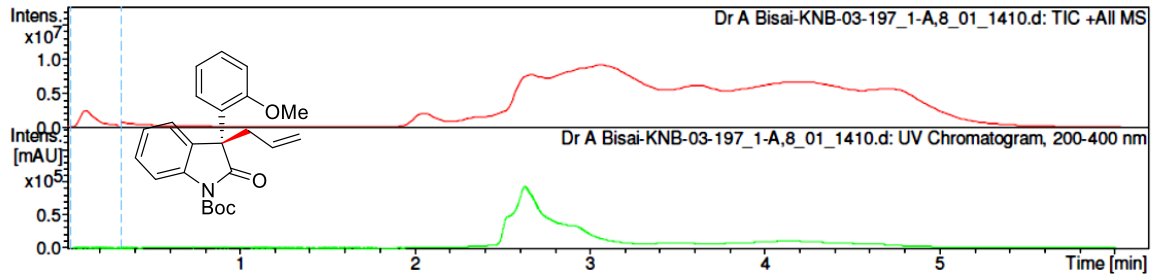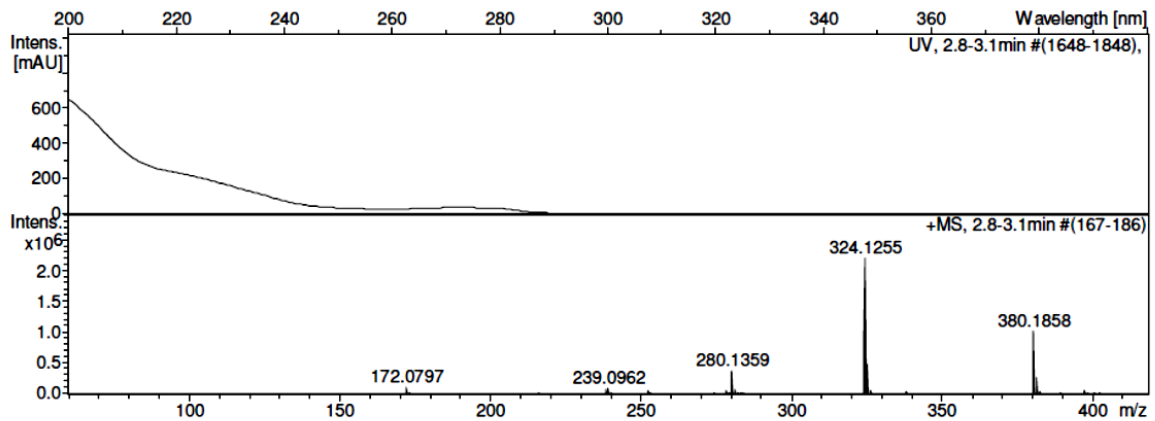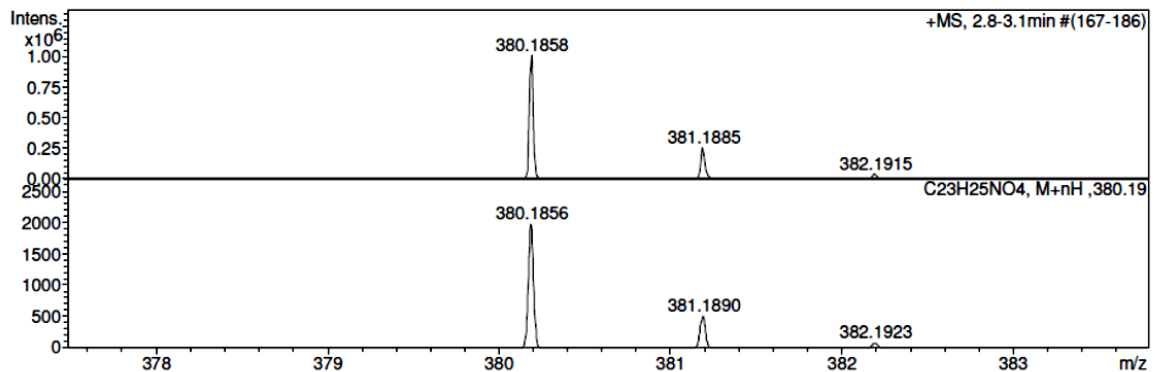

Scanned copy of mass spectrum of 5c

Data File C:\CHEM32\1\DATA\NARESH\AB-KNB-03-197-AD-H-3-254-1-40M.D

Sample Name: AB-KNB-03-197-AD-H-3-254-1-40M

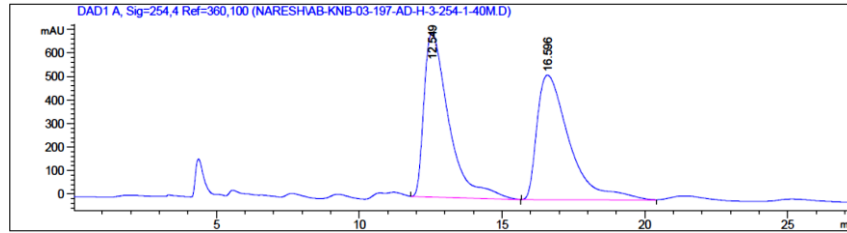

Signal 1: DAD1 A, Sig=254,4 Ref=360,100

| Peak # | RetTime [min] | Type | Width [min] | Area [mAU*s] | Height [mAU] | Area %  |
|--------|---------------|------|-------------|--------------|--------------|---------|
| 1      | 12.549        | BB   | 0.9100      | 4.20021e4    | 698.02222    | 50.2558 |
| 2      | 16.596        | BB   | 1.1960      | 4.15744e4    | 529.53717    | 49.7442 |

Totals : 8.35765e4 1227.55939

\*\*\* End of Report \*\*\*

HPLC data of (±)-5c

Data File C:\CHEM32\1\DATA\NARESH\AB-KNB-03-199-AD-H-3-254-1-40M.D

Sample Name: AB-KNB-03-199-AD-H-3-254-1-40M

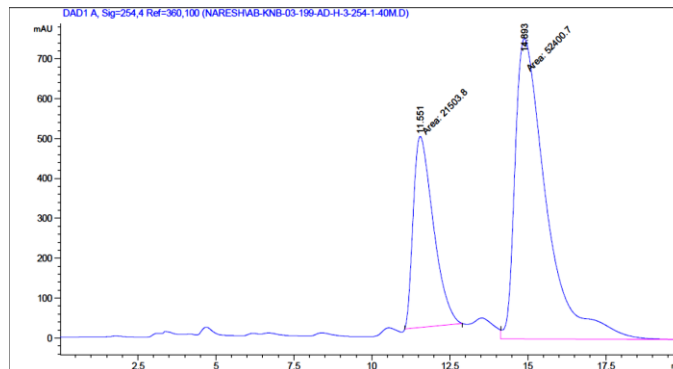

Signal 1: DAD1 A, Sig=254,4 Ref=360,100

| Peak # | RetTime [min] | Type | Width [min] | Area [mAU*s] | Height [mAU] | Area %  |
|--------|---------------|------|-------------|--------------|--------------|---------|
| 1      | 11.551        | MM   | 0.7491      | 2.15038e4    | 478.44043    | 29.0967 |
| 2      | 14.893        | MM   | 1.1608      | 5.24007e4    | 752.38489    | 70.9033 |

Totals : 7.39045e4 1230.82532

\*\*\* End of Report \*\*\*

HPLC data of (+)-5c

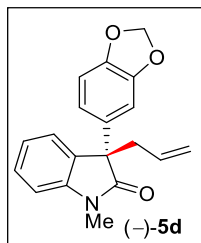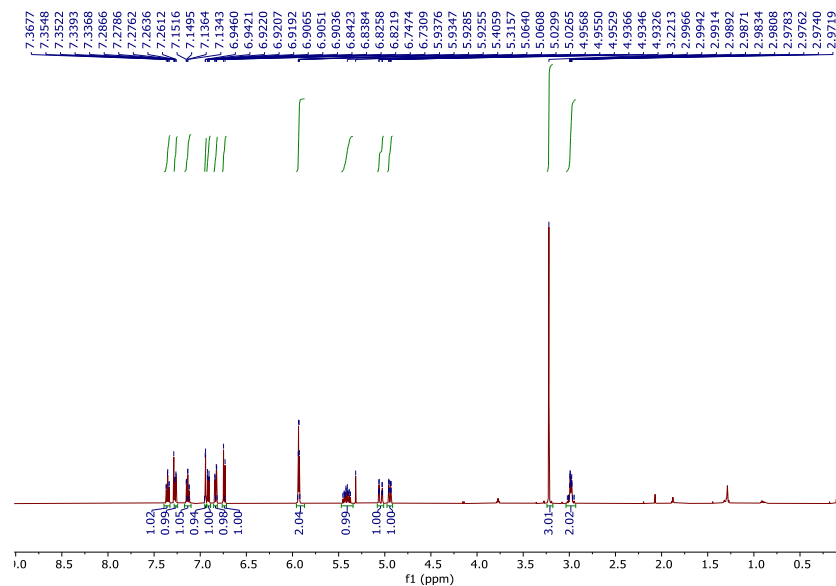 $^1\text{H}$  NMR (500 MHz,  $\text{CDCl}_3$ ) of compound (-)-5d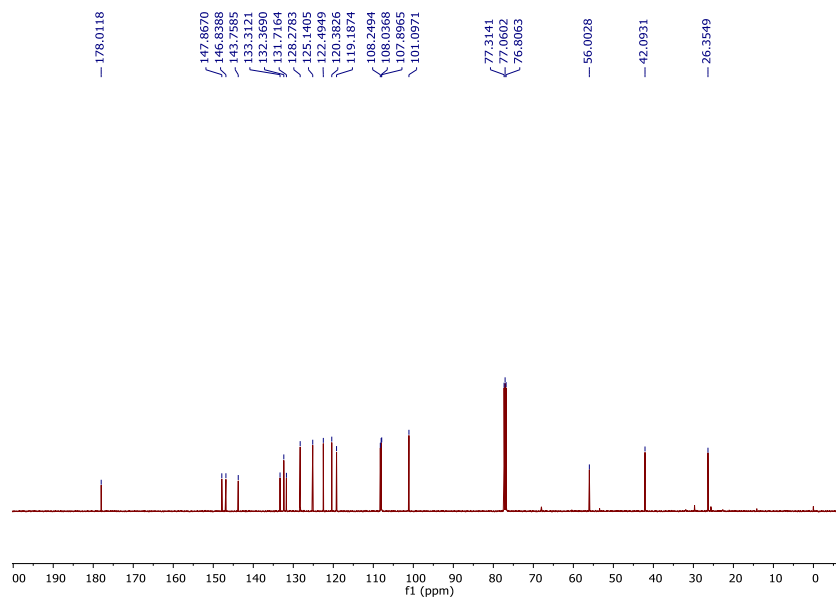 $^{13}\text{C}$  NMR (125 MHz,  $\text{CDCl}_3$ ) of compound (-)-5d



## Display Report

## Analysis Info

Analysis Name D:\Data\user data\2017\JUNE 2017\16 june\Dr.A.Bisai-AB-KNB-01-104.d  
Method Pos\_Mid\_tunemix.m  
Sample Name AB-KNB-01-104  
Comment

Acquisition Date 6/16/2017 4:25:41 PM

Operator RUCHI SHRIVASTAVA

Instrument micrOTOF-Q II 10330

## Acquisition Parameter

|             |          |                       |           |                  |           |
|-------------|----------|-----------------------|-----------|------------------|-----------|
| Source Type | ESI      | Ion Polarity          | Positive  | Set Nebulizer    | 0.3 Bar   |
| Focus       | Active   | Set Capillary         | 4500 V    | Set Dry Heater   | 200 °C    |
| Scan Begin  | 50 m/z   | Set End Plate Offset  | -500 V    | Set Dry Gas      | 4.0 l/min |
| Scan End    | 3000 m/z | Set Collision Cell RF | 450.0 Vpp | Set Divert Valve | Waste     |

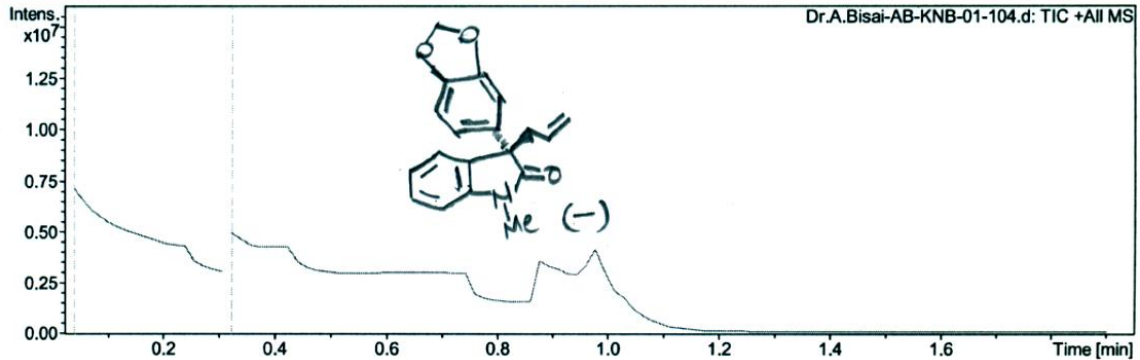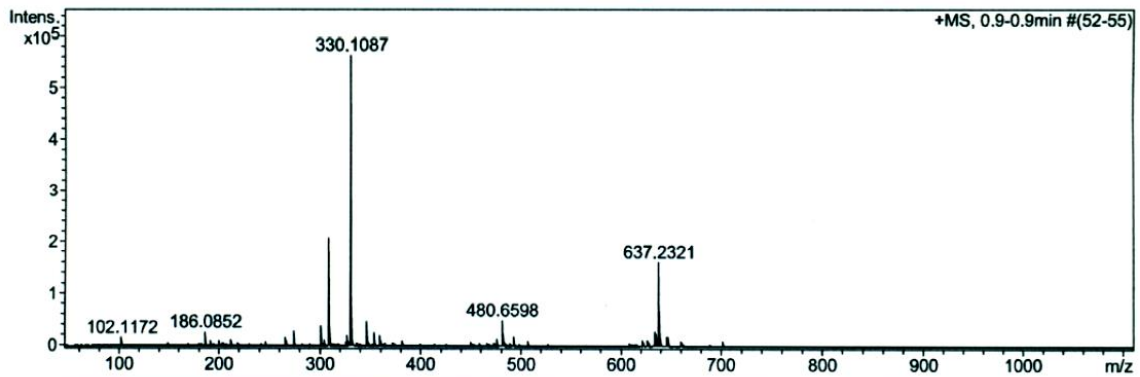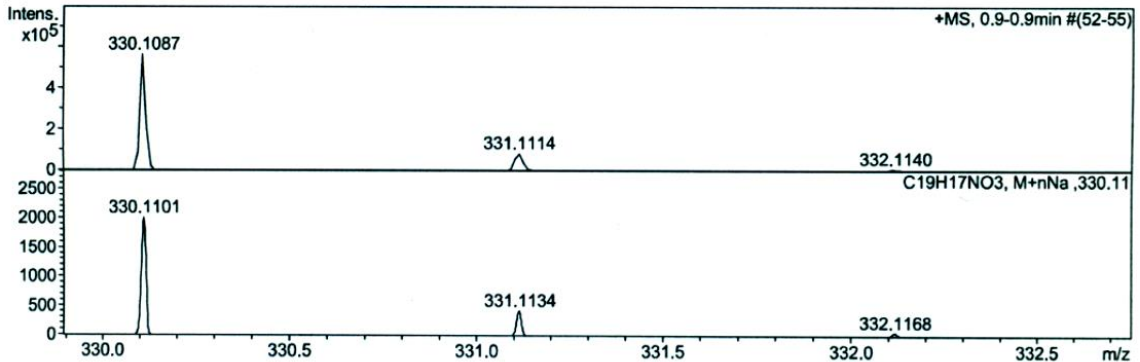

Data File C:\CHEM32\1\DATA\NARESH\2017-02-14AB-KNB-04-112-40-1-254-40M.D  
 Sample Name: AB-KNB-04-112-40-1-254-40M

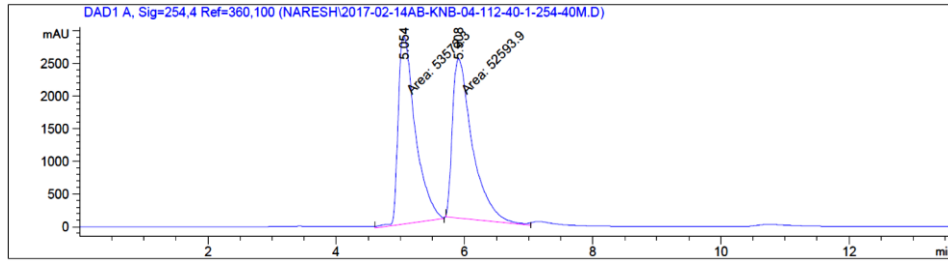

Signal 1: DAD1 A, Sig=254,4 Ref=360,100

| Peak # | RetTime [min] | Type | Width [min] | Area [mAU*s] | Height [mAU] | Area %  |
|--------|---------------|------|-------------|--------------|--------------|---------|
| 1      | 5.054         | MM   | 0.3109      | 5.35723e4    | 2871.45532   | 50.4608 |
| 2      | 5.908         | MM   | 0.3597      | 5.25939e4    | 2437.19238   | 49.5392 |

Totals : 1.06166e5 5308.64771

\*\*\* End of Report \*\*\*

### HPLC data of (±)-5d

Data File C:\CHEM32\1\DATA\NARESH\2017-02-14AB-KNB-04-104-40-1-254-40M.D  
 Sample Name: AB-KNB-04-104-40-1-254-40M

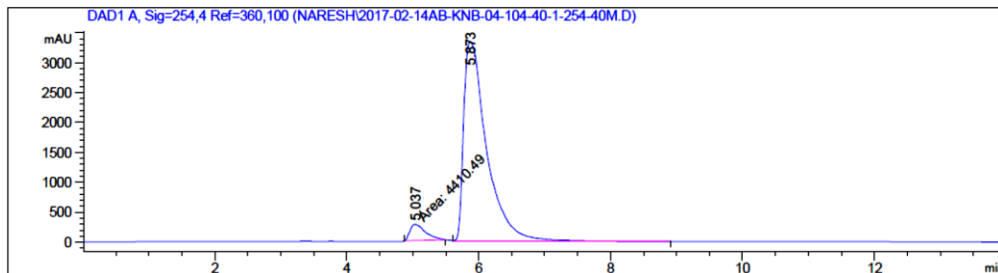

Signal 1: DAD1 A, Sig=254,4 Ref=360,100

| Peak # | RetTime [min] | Type | Width [min] | Area [mAU*s] | Height [mAU] | Area %  |
|--------|---------------|------|-------------|--------------|--------------|---------|
| 1      | 5.037         | MM   | 0.2758      | 4410.48535   | 266.49200    | 5.1225  |
| 2      | 5.873         | VB   | 0.3608      | 8.16890e4    | 3346.01221   | 94.8775 |

Totals : 8.60995e4 3612.50421

\*\*\* End of Report \*\*\*

### HPLC data of (-)-5d

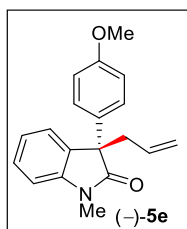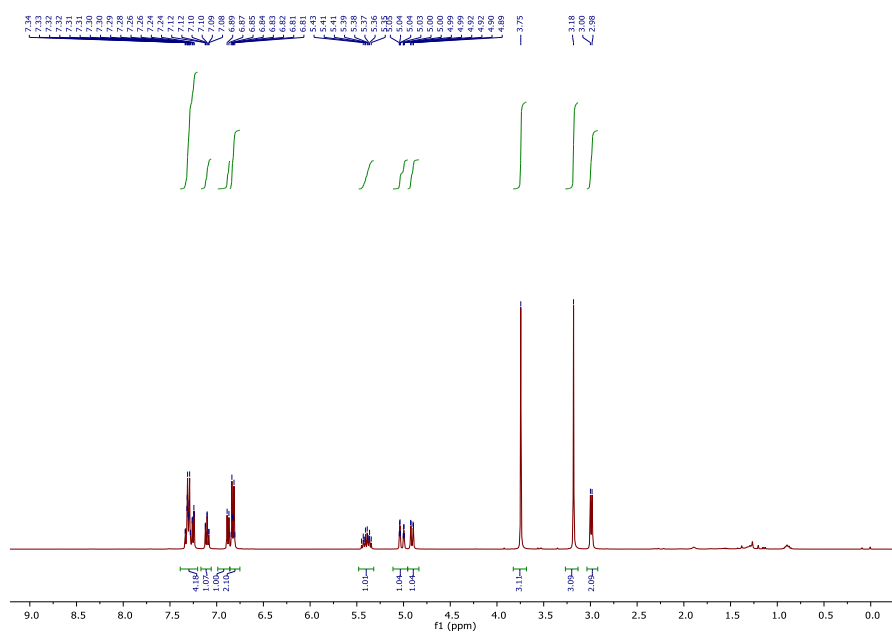

$^1\text{H}$  NMR (400 MHz,  $\text{CDCl}_3$ ) of compound (-)-**5e**

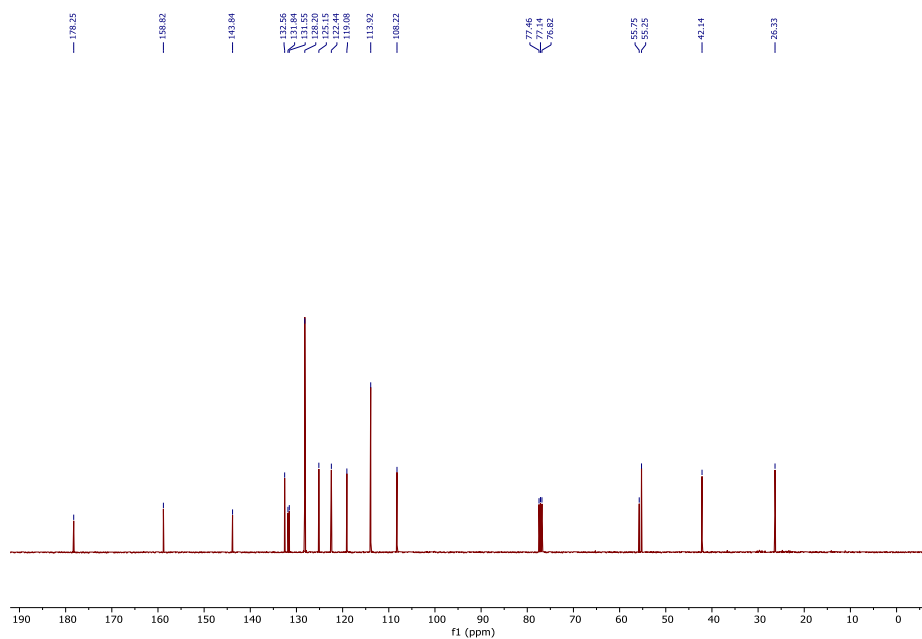

$^{13}\text{C}$  NMR (100 MHz,  $\text{CDCl}_3$ ) of compound (-)-**5e**

## Display Report

## Analysis Info

|               |                                                                         |                  |                      |
|---------------|-------------------------------------------------------------------------|------------------|----------------------|
| Analysis Name | D:\Data\user data\2017\JUNE 2017\15 june\Dr.A.Bisai-AB-KNB-04-113-RPT.d | Acquisition Date | 6/15/2017 3:32:39 PM |
| Method        | Pos_Mid_tunemix.m                                                       | Operator         | RUCHI SHRIVASTAVA    |
| Sample Name   | AB-KNB-04-113-RPT                                                       | Instrument       | micrOTOF-Q II 10330  |
| Comment       |                                                                         |                  |                      |

## Acquisition Parameter

|             |          |                       |           |                  |           |
|-------------|----------|-----------------------|-----------|------------------|-----------|
| Source Type | ESI      | Ion Polarity          | Positive  | Set Nebulizer    | 0.3 Bar   |
| Focus       | Active   | Set Capillary         | 4500 V    | Set Dry Heater   | 200 °C    |
| Scan Begin  | 50 m/z   | Set End Plate Offset  | -500 V    | Set Dry Gas      | 4.0 l/min |
| Scan End    | 3000 m/z | Set Collision Cell RF | 450.0 Vpp | Set Divert Valve | Waste     |

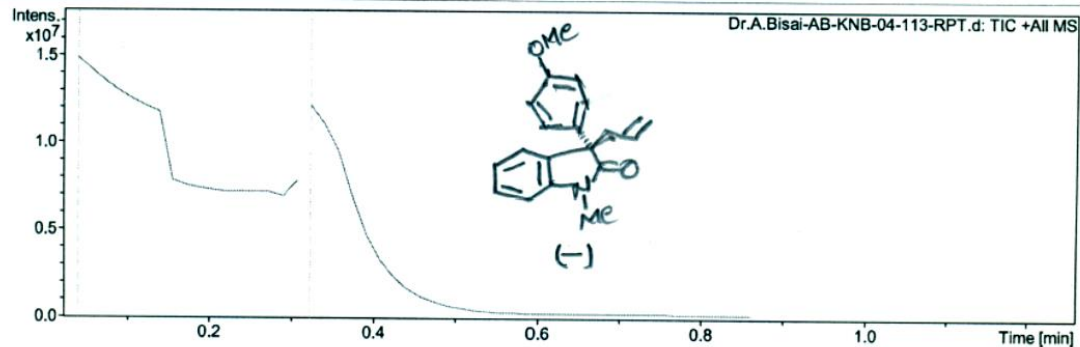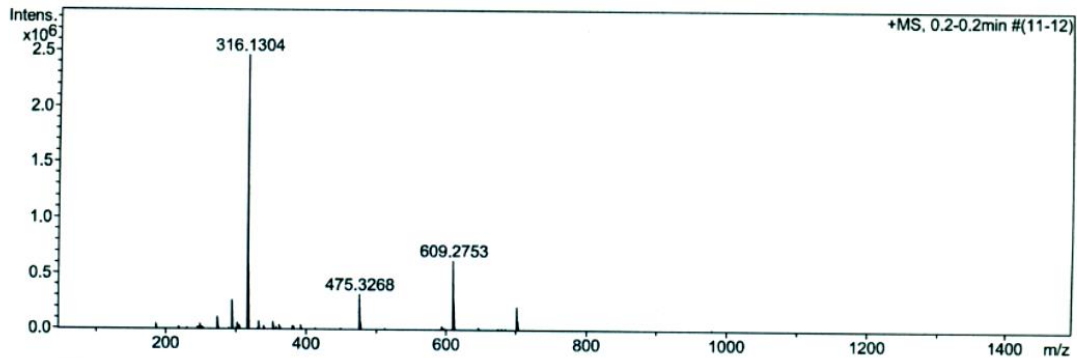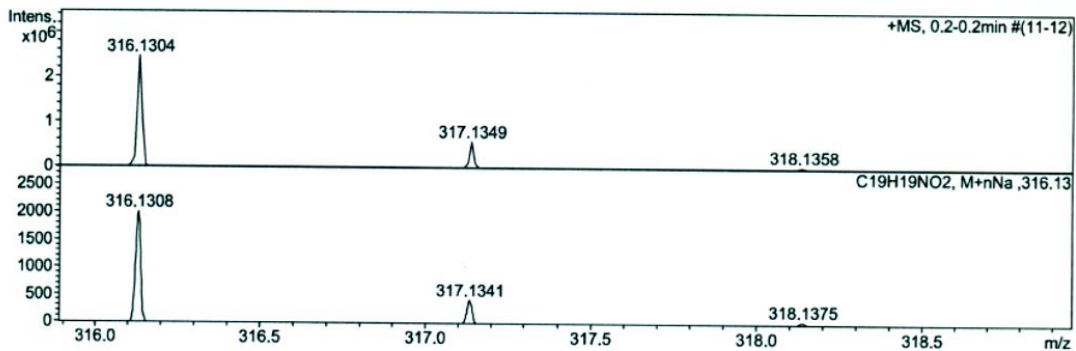

Data File C:\CHEM32\1\DATA\NARESH\2017-02-14AB-KNB-04-113-R-AS-3-10-1-254-60M.D  
 Sample Name: AB-KNB-04-113-R-AS-3-10-1-254-60M

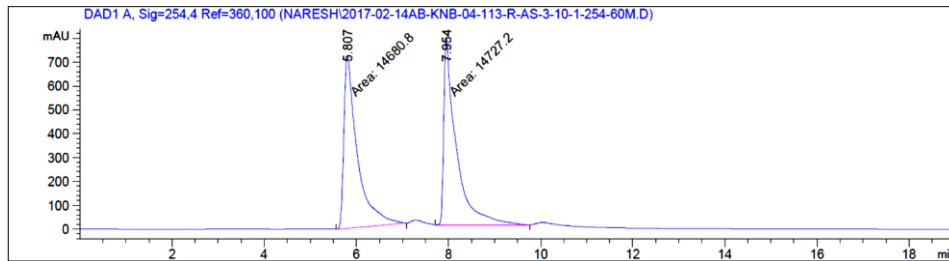

Signal 1: DAD1 A, Sig=254,4 Ref=360,100

| Peak # | RetTime [min] | Type | Width [min] | Area [mAU*s] | Height [mAU] | Area %  |
|--------|---------------|------|-------------|--------------|--------------|---------|
| 1      | 5.807         | MM   | 0.3373      | 1.46808e4    | 725.41425    | 49.9211 |
| 2      | 7.954         | MM   | 0.3135      | 1.47272e4    | 782.90521    | 50.0789 |

Totals : 2.94081e4 1508.31946

=====  
 \*\*\* End of Report \*\*\*

### HPLC data of (±)-5e

Data File C:\CHEM32\1\DATA\NARESH\2017-02-14AB-KNB-04-105-2-AS-3-10-1-254-60M.D  
 Sample Name: AB-KNB-04-105-2-AS-3-10-1-254-60M

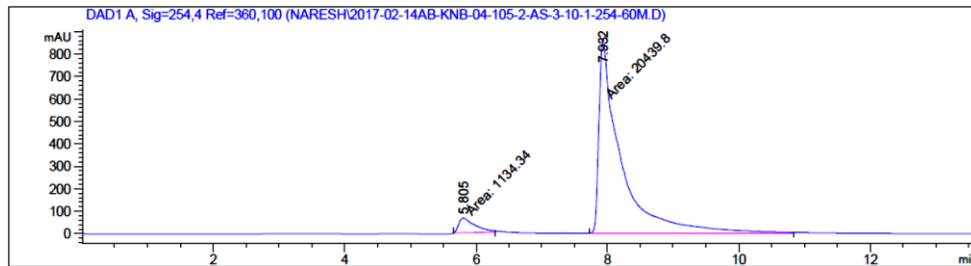

Signal 1: DAD1 A, Sig=254,4 Ref=360,100

| Peak # | RetTime [min] | Type | Width [min] | Area [mAU*s] | Height [mAU] | Area %  |
|--------|---------------|------|-------------|--------------|--------------|---------|
| 1      | 5.805         | MM   | 0.2850      | 1134.33728   | 66.34151     | 5.2578  |
| 2      | 7.932         | MM   | 0.3944      | 2.04398e4    | 863.64685    | 94.7422 |

Totals : 2.15742e4 929.98837

=====  
 \*\*\* End of Report \*\*\*

### HPLC data of (-)-5e

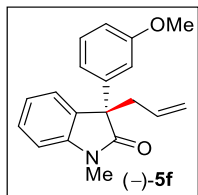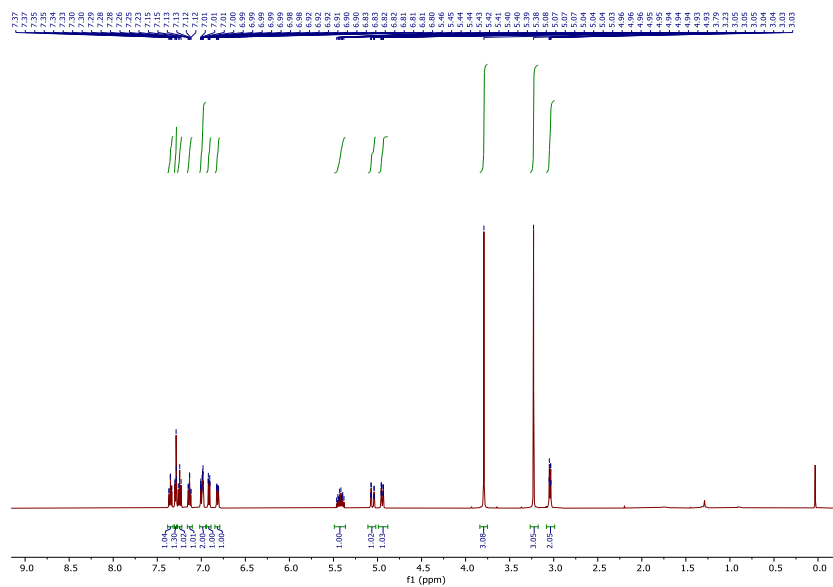

$^1\text{H}$  NMR (500 MHz,  $\text{CDCl}_3$ ) of compound (-)-**5f**

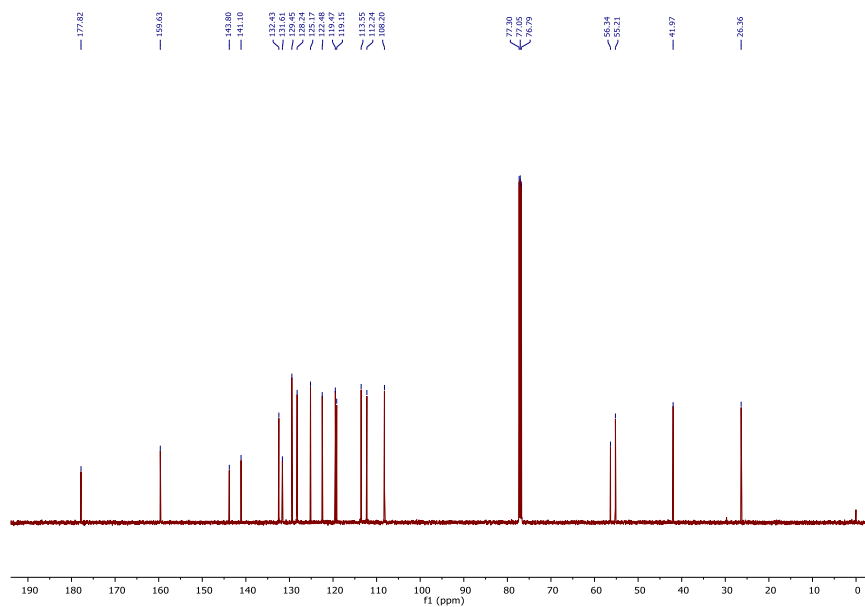

$^{13}\text{C}$  NMR (125 MHz,  $\text{CDCl}_3$ ) of compound (-)-**5f**

## Display Report

## Analysis Info

Analysis Name D:\Data\user data\2017\JUNE 2017\14 June\Dr.A.Bisai-AB-KNB-04-111\_1-B,1\_01\_2070.d  
 Method hrlcms\_pos\_mid\_tunemix.m  
 Sample Name Dr.A.Bisai-AB-KNB-04-111  
 Comment

Acquisition Date 6/14/2017 12:39:38 PM  
 Operator RUCHI SHRIVASTAVA  
 Instrument micrOTOF-Q II 10330

## Acquisition Parameter

|             |          |                       |           |                  |           |
|-------------|----------|-----------------------|-----------|------------------|-----------|
| Source Type | ESI      | Ion Polarity          | Positive  | Set Nebulizer    | 0.3 Bar   |
| Focus       | Active   | Set Capillary         | 4500 V    | Set Dry Heater   | 200 °C    |
| Scan Begin  | 50 m/z   | Set End Plate Offset  | -500 V    | Set Dry Gas      | 4.0 l/min |
| Scan End    | 3000 m/z | Set Collision Cell RF | 450.0 Vpp | Set Divert Valve | Waste     |

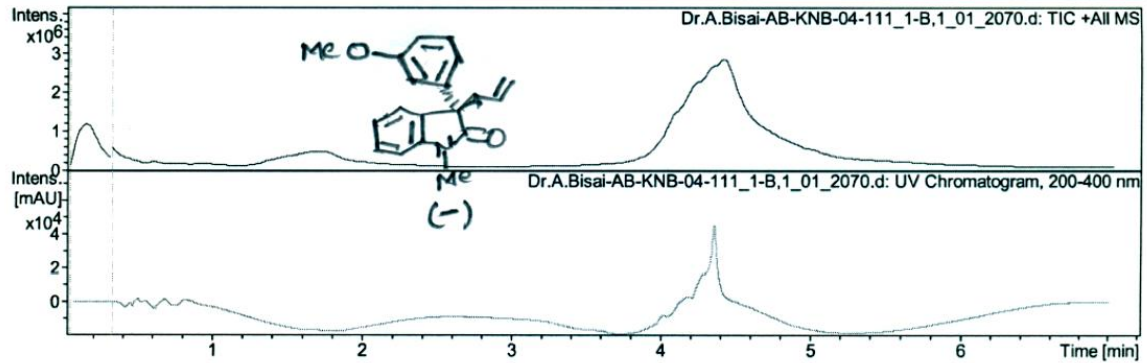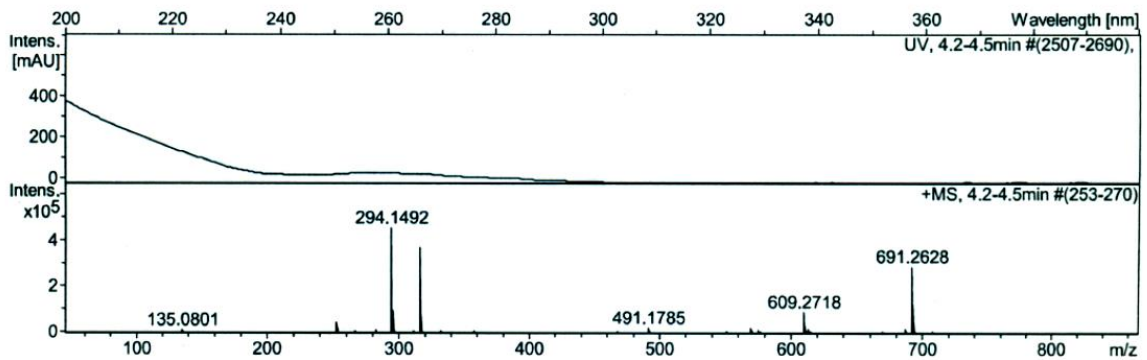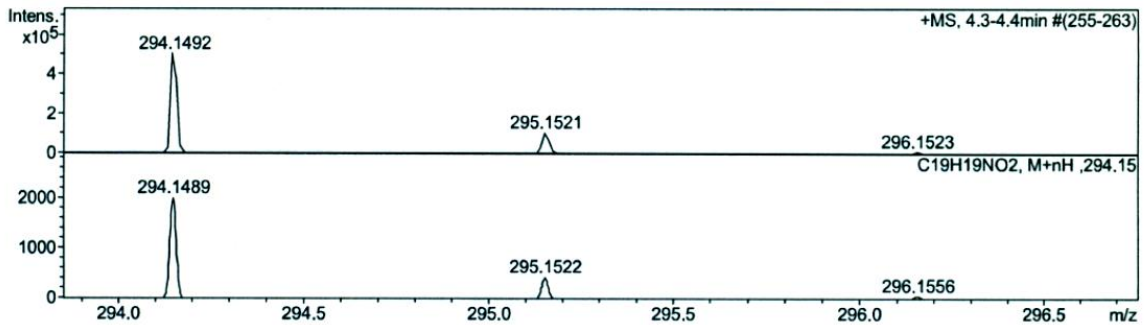

Data File C:\CHEM32\1\DATA\NARESH\2017-02-14AB-KNB-04-111-ADH-30-1-254-50M.D

Sample Name: AB-KNB-04-111-ADH-30-1-254-50M

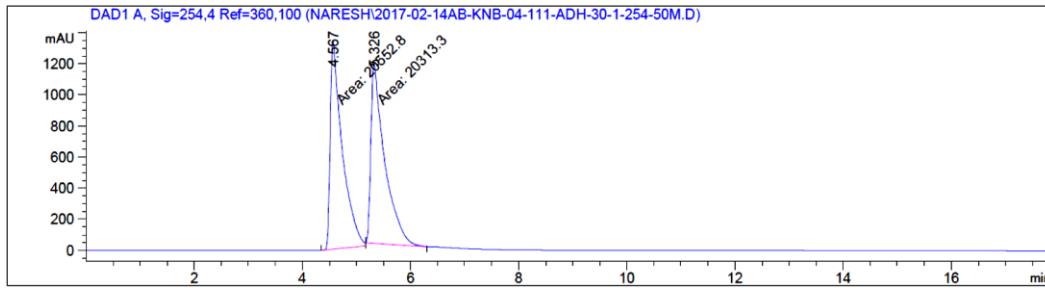

Signal 1: DAD1 A, Sig=254,4 Ref=360,100

| Peak # | RetTime [min] | Type | Width [min] | Area [mAU*s] | Height [mAU] | Area %  |
|--------|---------------|------|-------------|--------------|--------------|---------|
| 1      | 4.567         | MM   | 0.2560      | 2.05528e4    | 1337.87659   | 50.2930 |
| 2      | 5.326         | MM   | 0.2933      | 2.03133e4    | 1154.38843   | 49.7070 |

Totals : 4.08662e4 2492.26501

\*\*\* End of Report \*\*\*

## HPLC data of (±)-5f

Data File C:\CHEM32\1\DATA\NARESH\2017-02-14AB-KNB-04-106-ADH-30-1-254-50M.D

Sample Name: AB-KNB-04-106-ADH-30-1-254-50M

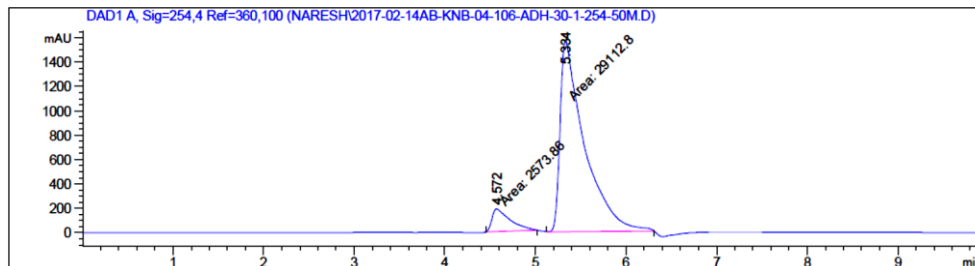

Signal 1: DAD1 A, Sig=254,4 Ref=360,100

| Peak # | RetTime [min] | Type | Width [min] | Area [mAU*s] | Height [mAU] | Area %  |
|--------|---------------|------|-------------|--------------|--------------|---------|
| 1      | 4.572         | MM   | 0.2291      | 2573.85840   | 187.26247    | 8.1228  |
| 2      | 5.334         | MM   | 0.3095      | 2.91128e4    | 1567.78357   | 91.8772 |

Totals : 3.16867e4 1755.04604

\*\*\* End of Report \*\*\*

## HPLC data of (-)-5f



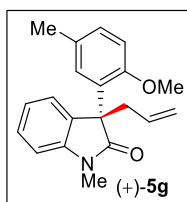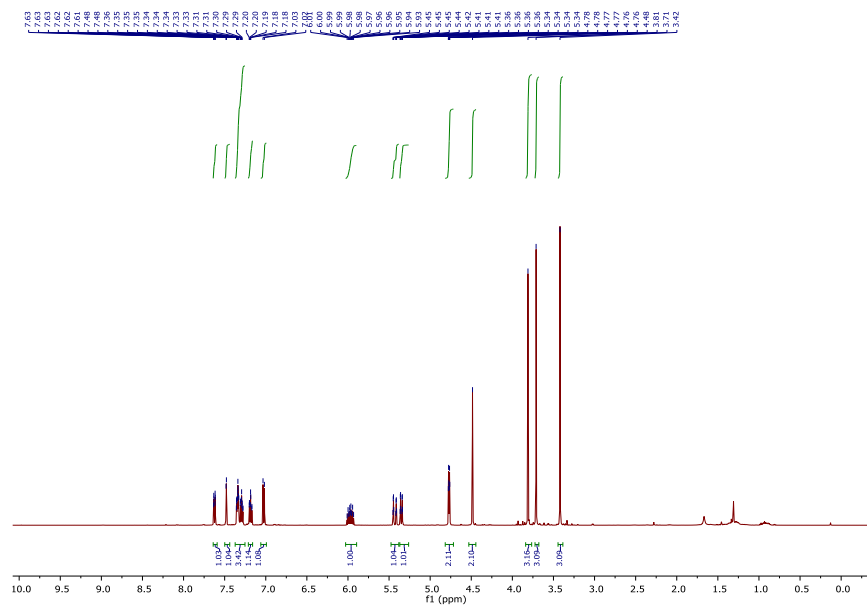

$^1\text{H}$  NMR (500 MHz,  $\text{CDCl}_3$ ) of compound (+)-**5g**

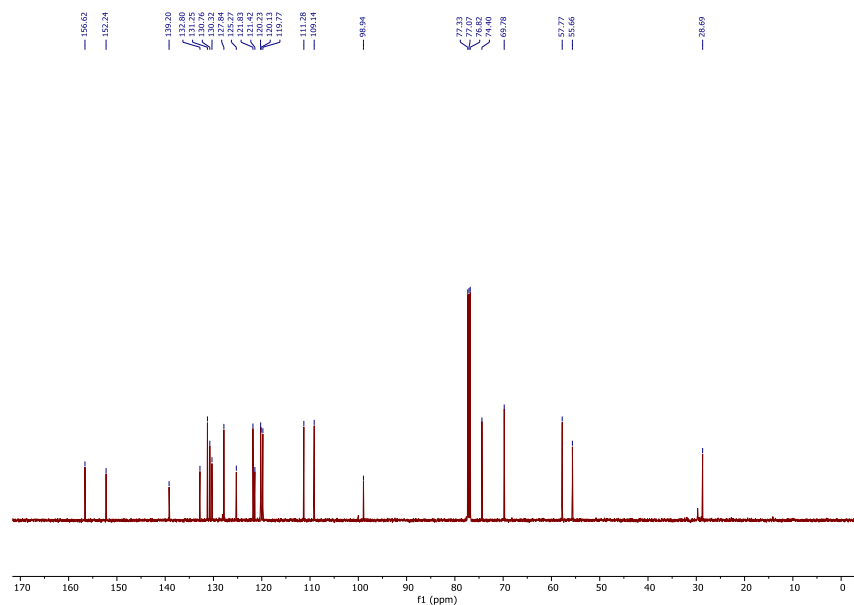

$^{13}\text{C}$  NMR (125 MHz,  $\text{CDCl}_3$ ) of compound (+)-**5g**

## Display Report

## Analysis Info

Analysis Name D:\Data\user data\2017\JUNE 2017\09 JUNE\Dr A Bisai-AB-KNB-04-034-2\_1-A,3\_01\_1985.d Acquisition Date 6/9/2017 2:45:53 PM  
 Method hrlcms\_pos\_mid\_tunemix.m Operator RUCHI SHRIVASTAVA  
 Sample Name Dr A Bisai-AB-KNB-04-034-2 Instrument micrOTOF-Q II 10330  
 Comment

## Acquisition Parameter

|             |          |                       |           |                  |           |
|-------------|----------|-----------------------|-----------|------------------|-----------|
| Source Type | ESI      | Ion Polarity          | Positive  | Set Nebulizer    | 0.3 Bar   |
| Focus       | Active   | Set Capillary         | 4500 V    | Set Dry Heater   | 200 °C    |
| Scan Begin  | 50 m/z   | Set End Plate Offset  | -500 V    | Set Dry Gas      | 4.0 l/min |
| Scan End    | 3000 m/z | Set Collision Cell RF | 450.0 Vpp | Set Divert Valve | Waste     |

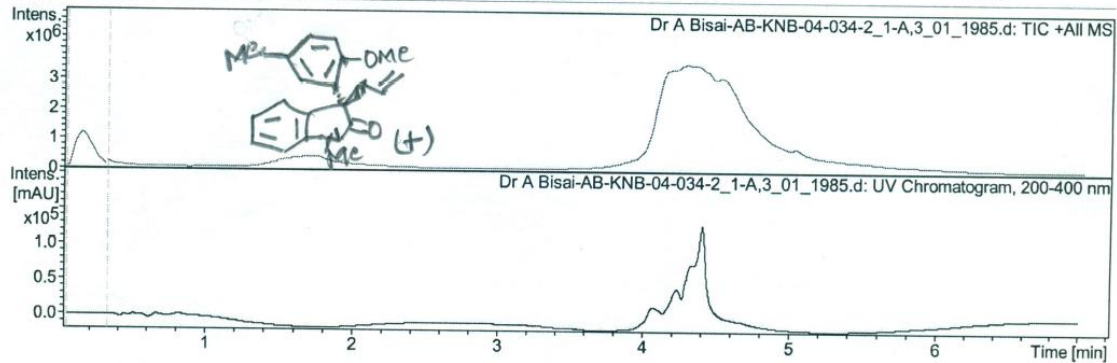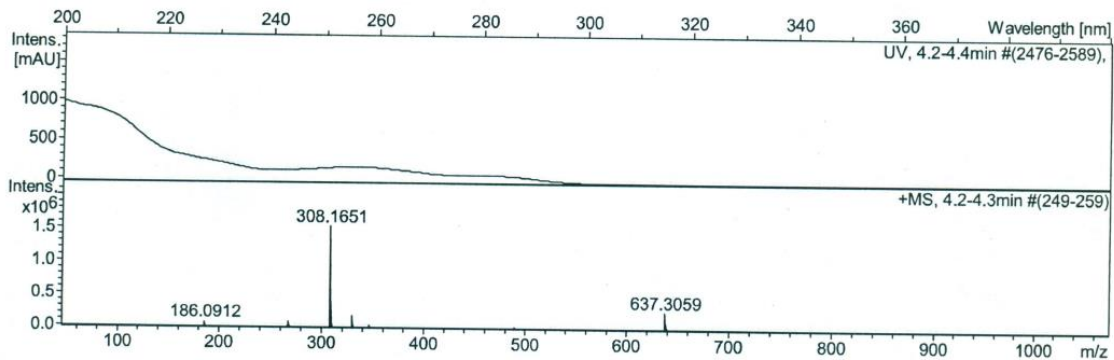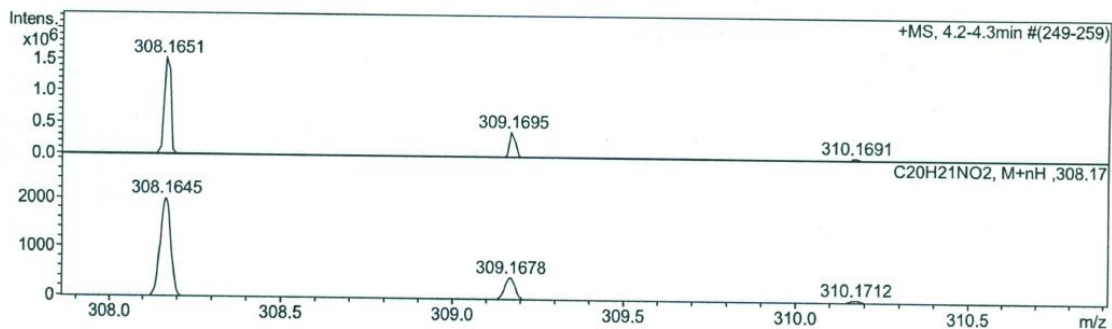

Scanned copy of mass spectrum of (+)-5g

Data File C:\CHEM32\1\DATA\NARESH\2017-01-02AB-KNB-04-034-2-AD-H-30-1-ALLDAD-50M.D  
 Sample Name: AB-KNB-04-034-2-AD-H-30-1-ALLDAD-50M

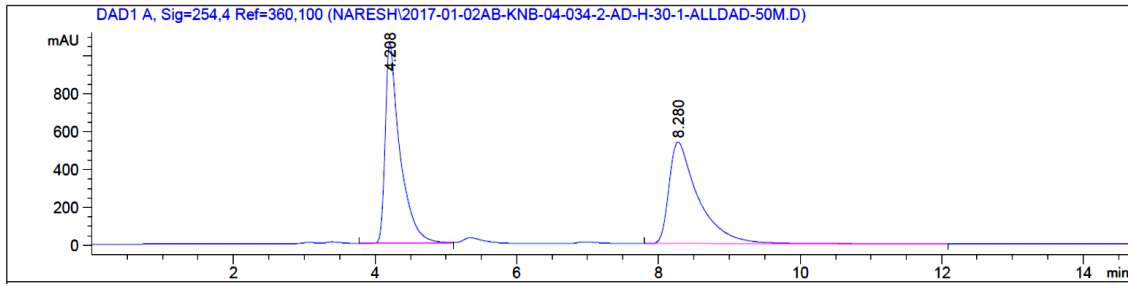

Signal 1: DAD1 A, Sig=254,4 Ref=360,100

| Peak # | RetTime [min] | Type | Width [min] | Area [mAU*s] | Height [mAU] | Area %  |
|--------|---------------|------|-------------|--------------|--------------|---------|
| 1      | 4.208         | BV   | 0.2006      | 1.53703e4    | 1063.69080   | 49.9624 |
| 2      | 8.280         | BB   | 0.4080      | 1.53935e4    | 537.75537    | 50.0376 |

Totals : 3.07638e4 1601.44617

HPLC data of (±)-5g

Data File C:\CHEM32\1\DATA\NARESH\2017-01-02AB-KNB-04-058-AD-H-30-1-ALLDAD-50M.D  
 Sample Name: AB-KNB-04-058-AD-H-30-1-ALLDAD-50M

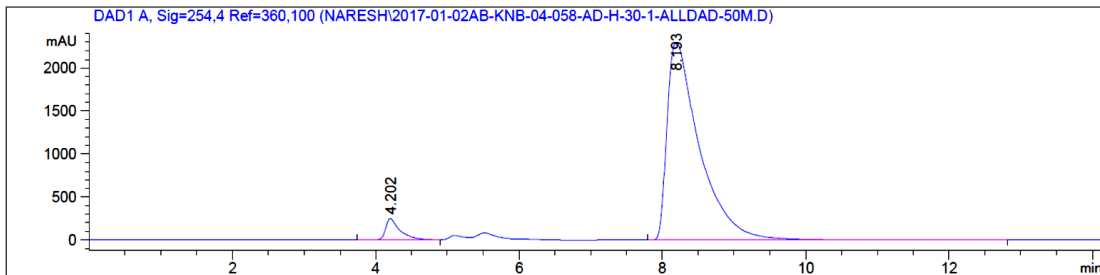

Signal 1: DAD1 A, Sig=254,4 Ref=360,100

| Peak # | RetTime [min] | Type | Width [min] | Area [mAU*s] | Height [mAU] | Area %  |
|--------|---------------|------|-------------|--------------|--------------|---------|
| 1      | 4.202         | BB   | 0.1928      | 3386.71289   | 245.65765    | 4.4902  |
| 2      | 8.193         | BB   | 0.4608      | 7.20378e4    | 2291.38867   | 95.5098 |

Totals : 7.54245e4 2537.04633

HPLC data of (+)-5g

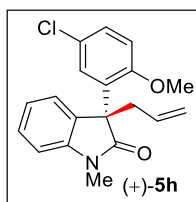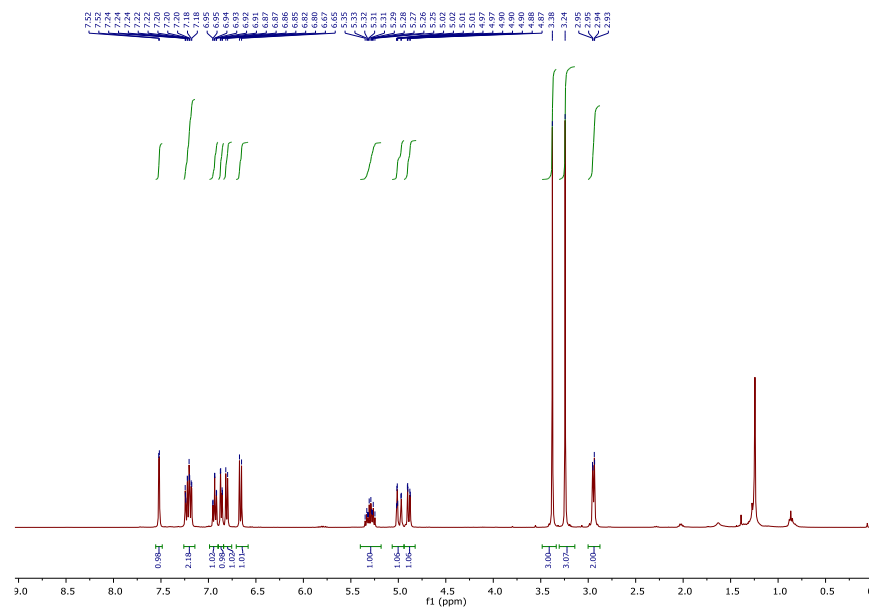

$^1\text{H}$  NMR (400 MHz,  $\text{CDCl}_3$ ) of compound (+)-**5h**

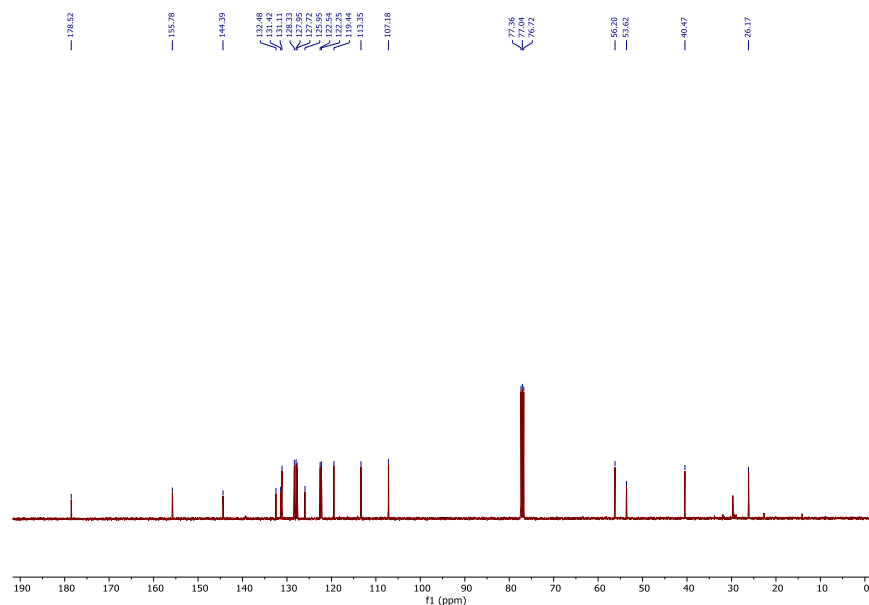

$^{13}\text{C}$  NMR (100 MHz,  $\text{CDCl}_3$ ) of compound (+)-**5h**

## Display Report

## Analysis Info

|               |                                                                                  |                  |                      |
|---------------|----------------------------------------------------------------------------------|------------------|----------------------|
| Analysis Name | D:\Data\user data\2017\JUNE 2017\14 June\Dr.A.Bisai-AB-KNB-04-53_1-B,3_01_2073.d | Acquisition Date | 6/14/2017 1:04:07 PM |
| Method        | hrlcms_pos_mid_tunemix.m                                                         | Operator         | RUCHI SHRIVASTAVA    |
| Sample Name   | Dr.A.Bisai-AB-KNB-04-53                                                          | Instrument       | micrOTOF-Q II 10330  |
| Comment       |                                                                                  |                  |                      |

## Acquisition Parameter

|             |          |                       |           |                  |           |
|-------------|----------|-----------------------|-----------|------------------|-----------|
| Source Type | ESI      | Ion Polarity          | Positive  | Set Nebulizer    | 0.3 Bar   |
| Focus       | Active   | Set Capillary         | 4500 V    | Set Dry Heater   | 200 °C    |
| Scan Begin  | 50 m/z   | Set End Plate Offset  | -500 V    | Set Dry Gas      | 4.0 l/min |
| Scan End    | 3000 m/z | Set Collision Cell RF | 450.0 Vpp | Set Divert Valve | Waste     |

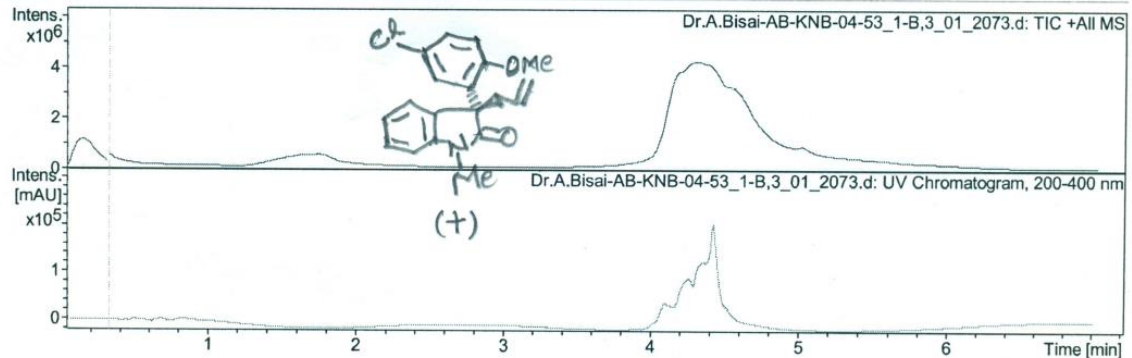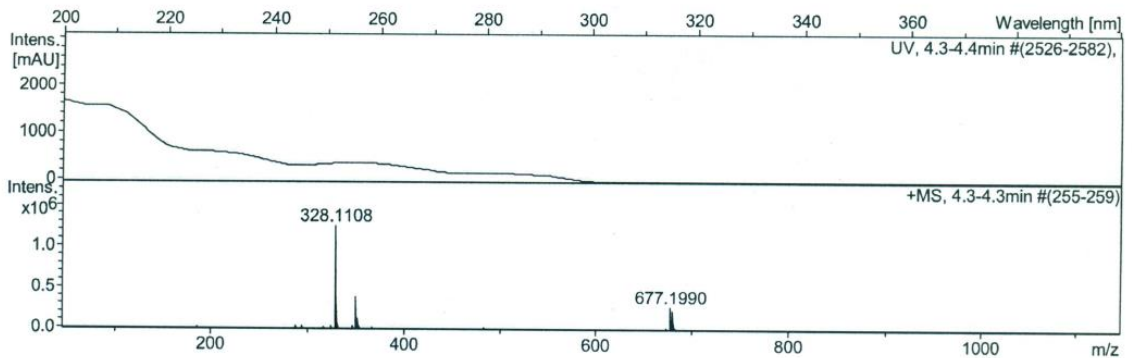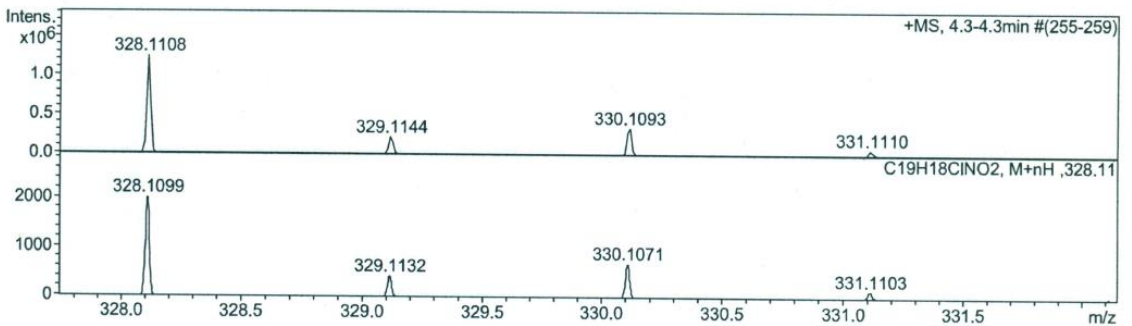Scanned copy of mass spectrum of **5h**

Data File C:\CHEM32\1\DATA\NARESH\2016-12-29AB-KNB-04-053-AD-H-30-1-254-50M.D

Sample Name: AB-KNB-04-053-AD-H-30-1-254-50M

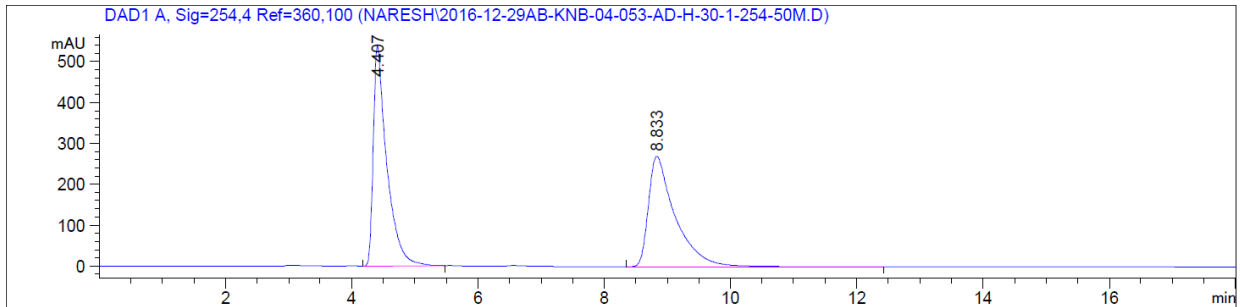

Signal 1: DAD1 A, Sig=254,4 Ref=360,100

| Peak # | RetTime [min] | Type | Width [min] | Area [mAU*s] | Height [mAU] | Area %  |
|--------|---------------|------|-------------|--------------|--------------|---------|
| 1      | 4.407         | BB   | 0.2064      | 7975.66406   | 539.84253    | 50.1261 |
| 2      | 8.833         | BB   | 0.4167      | 7935.55029   | 270.11868    | 49.8739 |

Totals : 1.59112e4 809.96121

## HPLC data of (±)-5h

Data File C:\CHEM32\1\DATA\NARESH\2017-01-02AB-KNB-04-060-AD-H-30-1-254-50M.D

Sample Name: AB-KNB-04-060-AD-H-30-1-254-50M

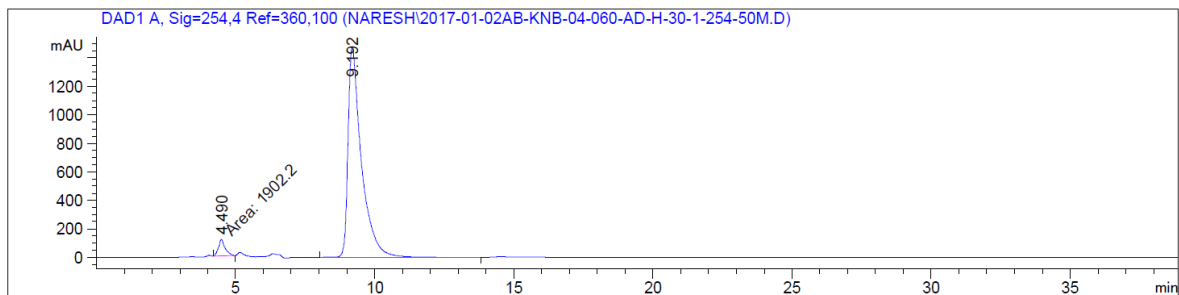

Signal 1: DAD1 A, Sig=254,4 Ref=360,100

| Peak # | RetTime [min] | Type | Width [min] | Area [mAU*s] | Height [mAU] | Area %  |
|--------|---------------|------|-------------|--------------|--------------|---------|
| 1      | 4.490         | MM   | 0.2711      | 1902.19641   | 116.96391    | 3.7157  |
| 2      | 9.192         | BB   | 0.4823      | 4.92918e4    | 1473.56006   | 96.2843 |

Totals : 5.11940e4 1590.52397

## HPLC data of (+)-5h



## Display Report

## Analysis Info

Analysis Name D:\Data\user data\2017\JUNE 2017\13 june\Dr A Bisai-KNB-04-052\_1-E,2\_01\_2049.d  
 Method hrlcms\_pos\_mid\_tunemix.m  
 Sample Name Dr A Bisai-KNB-04-052  
 Comment

Acquisition Date 6/13/2017 3:27:17 PM  
 Operator RUCHI SHRIVASTAVA  
 Instrument micrOTOF-Q II 10330

## Acquisition Parameter

|             |          |                       |           |                  |           |
|-------------|----------|-----------------------|-----------|------------------|-----------|
| Source Type | ESI      | Ion Polarity          | Positive  | Set Nebulizer    | 0.3 Bar   |
| Focus       | Active   | Set Capillary         | 4500 V    | Set Dry Heater   | 200 °C    |
| Scan Begin  | 50 m/z   | Set End Plate Offset  | -500 V    | Set Dry Gas      | 4.0 l/min |
| Scan End    | 3000 m/z | Set Collision Cell RF | 450.0 Vpp | Set Divert Valve | Waste     |

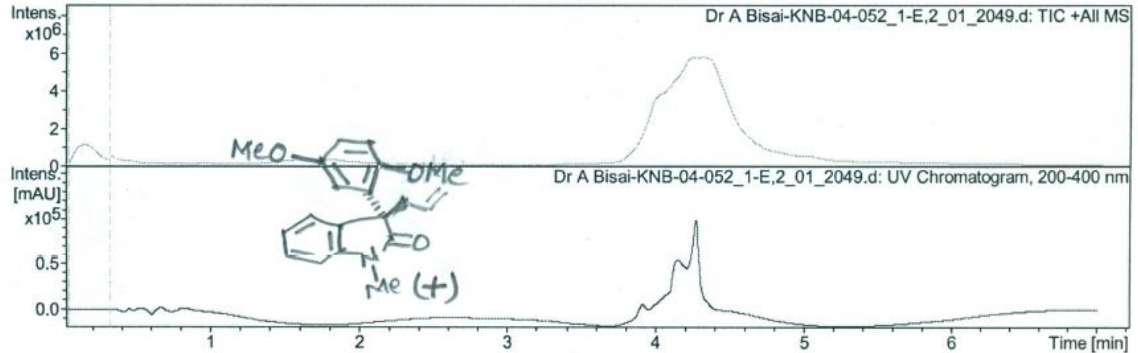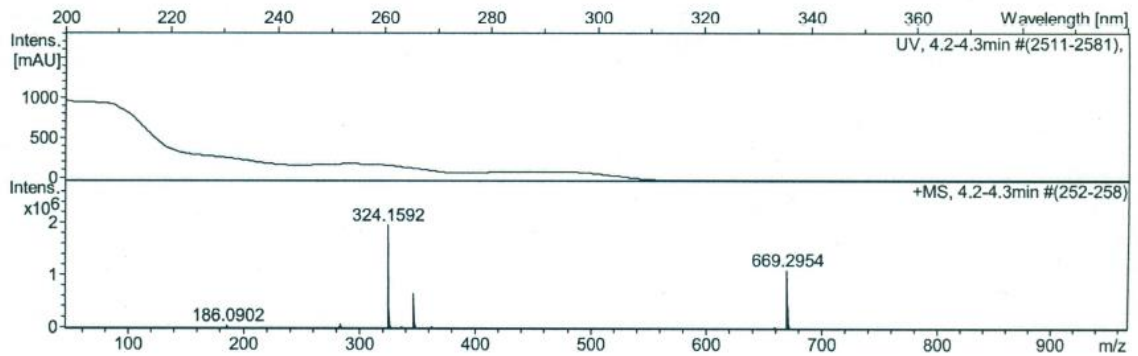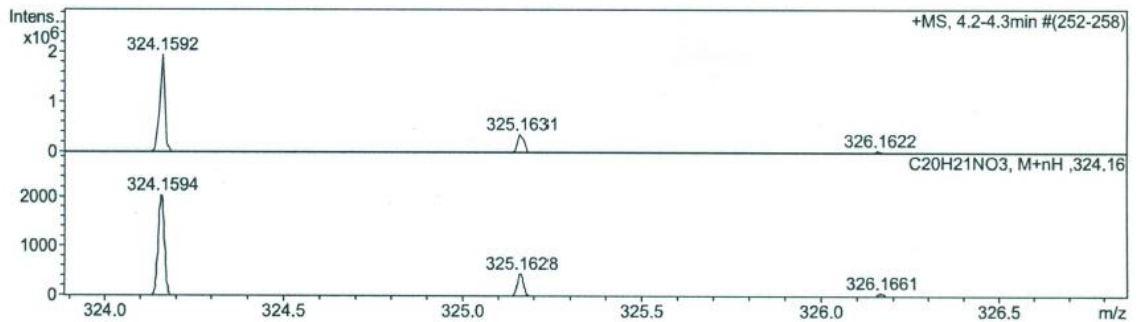



Data File C:\CHEM32\1\DATA\NARESH\2017-01-03AB-KNB-04-052-AD-H-30-1-ALLDAD-50M.D  
 Sample Name: AB-KNB-04-052-AD-H-30-1-ALLDAD-50M

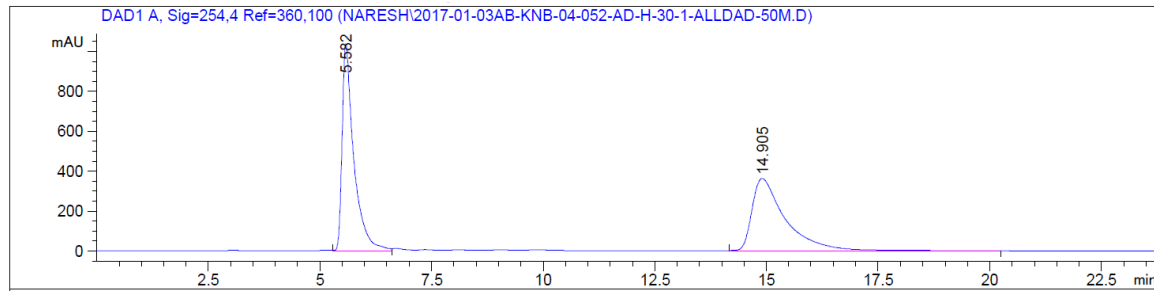

Signal 1: DAD1 A, Sig=254,4 Ref=360,100

| Peak # | RetTime [min] | Type | Width [min] | Area [mAU*s] | Height [mAU] | Area %  |
|--------|---------------|------|-------------|--------------|--------------|---------|
| 1      | 5.582         | VV   | 0.2578      | 1.88038e4    | 1035.96680   | 50.3399 |
| 2      | 14.905        | BB   | 0.7437      | 1.85499e4    | 360.88019    | 49.6601 |

Totals : 3.73538e4 1396.84698

HPLC data of (±)-5i

Data File C:\CHEM32\1\DATA\NARESH\2017-01-03AB-KNB-04-060-OME-2-AD-H-30-1-254-50M.D  
 Sample Name: AB-KNB-04-060-OME-2-AD-H-30-1-254-50M

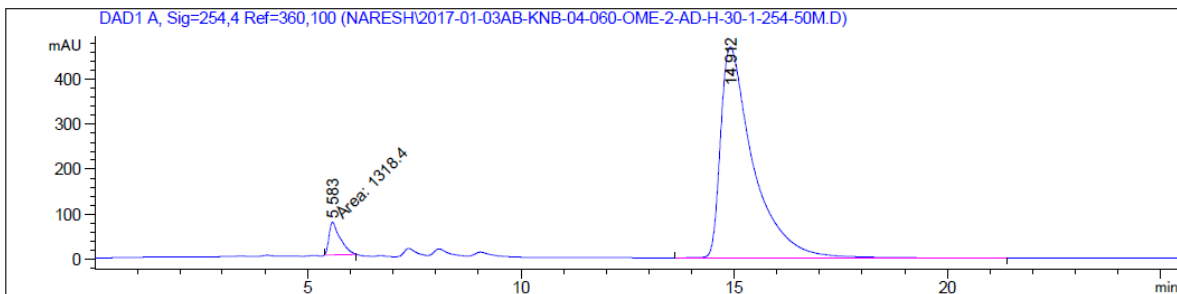

Signal 1: DAD1 A, Sig=254,4 Ref=360,100

| Peak # | RetTime [min] | Type | Width [min] | Area [mAU*s] | Height [mAU] | Area %  |
|--------|---------------|------|-------------|--------------|--------------|---------|
| 1      | 5.583         | MM   | 0.3018      | 1318.40088   | 72.80338     | 5.0551  |
| 2      | 14.912        | BB   | 0.7671      | 2.47621e4    | 468.10709    | 94.9449 |

Totals : 2.60805e4 540.91046

HPLC data of (+)-5i



## Display Report

## Analysis Info

Analysis Name D:\Data\NEW USER DATA 2017\2018\26 mar\Dr A Bisai-KNB-04-166\_1-C,7\_01\_1389.d  
Method hrlcms-20 sept.m  
Sample Name Dr A Bisai-KNB-04-166  
Comment

Acquisition Date 3/26/2018 1:14:36 PM  
Operator RUCHI  
Instrument micrOTOF-Q II 10330

## Acquisition Parameter

|             |          |                       |           |                  |           |
|-------------|----------|-----------------------|-----------|------------------|-----------|
| Source Type | ESI      | Ion Polarity          | Positive  | Set Nebulizer    | 1.2 Bar   |
| Focus       | Active   | Set Capillary         | 4500 V    | Set Dry Heater   | 200 °C    |
| Scan Begin  | 50 m/z   | Set End Plate Offset  | -500 V    | Set Dry Gas      | 7.0 l/min |
| Scan End    | 3000 m/z | Set Collision Cell RF | 130.0 Vpp | Set Divert Valve | Waste     |

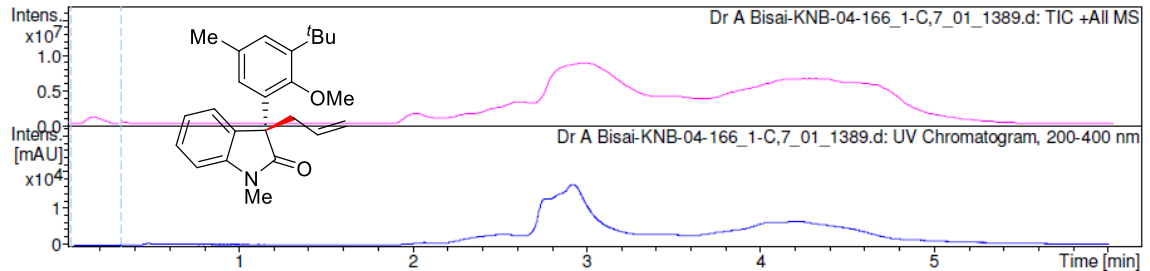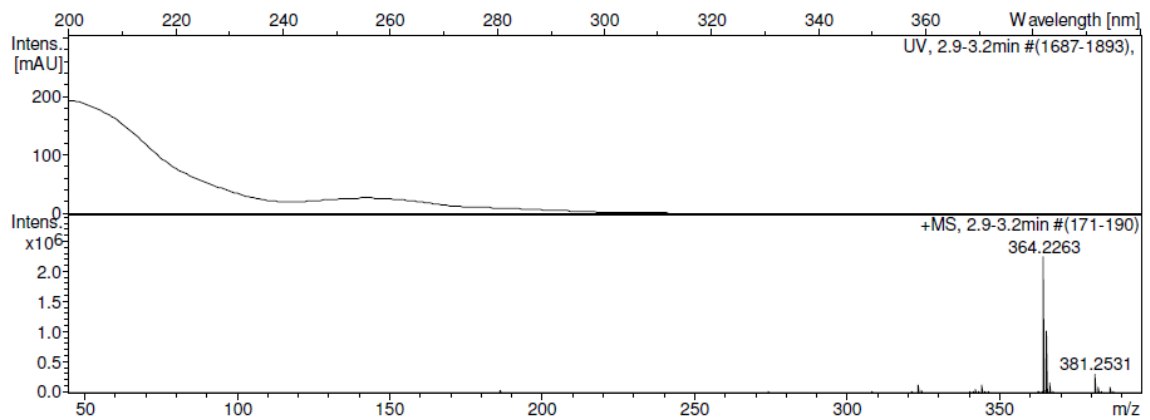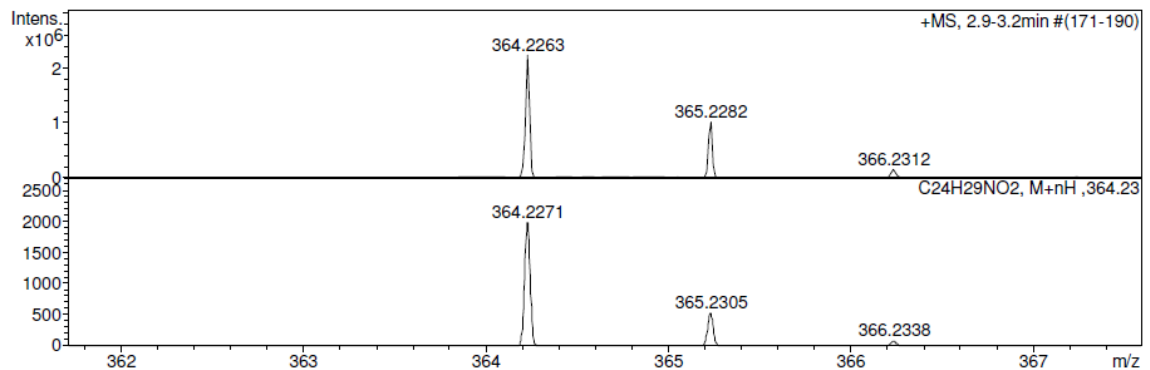

Data File C:\CHEM32\1\DATA\NARESH\2017-03-2711-39-18AB-KNB-04-165-RR-ID-3-2-1-254-60M.D  
 Sample Name: AB-KNB-04-165-RR-ID-3-2-1-254-60M

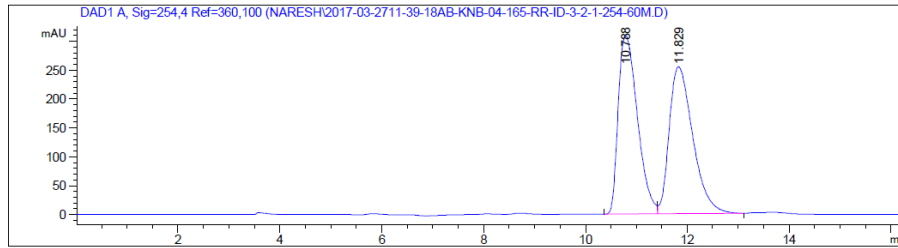

Signal 1: DAD1 A, Sig=254,4 Ref=360,100

| Peak # | RetTime [min] | Type | Width [min] | Area [mAU*s] | Height [mAU] | Area %  |
|--------|---------------|------|-------------|--------------|--------------|---------|
| 1      | 10.788        | BV   | 0.4135      | 8094.69043   | 309.09021    | 49.6398 |
| 2      | 11.829        | VB   | 0.5024      | 8212.16895   | 254.52612    | 50.3602 |

Totals : 1.63069e4 563.61633

=====  
 \*\*\* End of Report \*\*\*

### HPLC data of (±)-5j

Data File C:\CHEM32\...TA\NARESH\2017-03-2711-58-36AB-KNB-04-166-CRYST2-ID-3-2-1-254-60M.D  
 Sample Name: AB-KNB-04-166-Cryst2-ID-3-2-1-254-60M

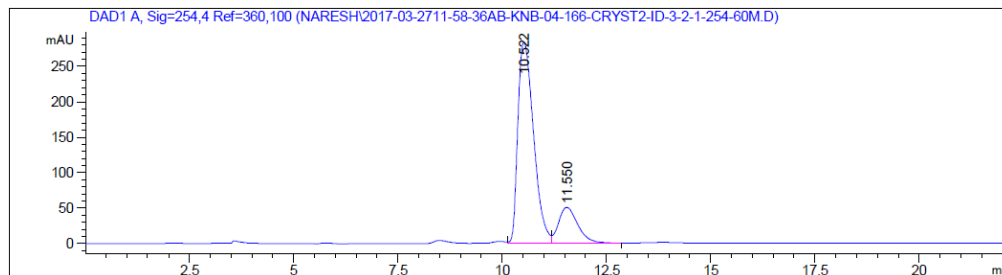

Signal 1: DAD1 A, Sig=254,4 Ref=360,100

| Peak # | RetTime [min] | Type | Width [min] | Area [mAU*s] | Height [mAU] | Area %  |
|--------|---------------|------|-------------|--------------|--------------|---------|
| 1      | 10.522        | WV   | 0.4133      | 7411.82178   | 283.27341    | 82.0706 |
| 2      | 11.550        | VB   | 0.4944      | 1619.21118   | 50.45833     | 17.9294 |

Totals : 9031.03296 333.73174

=====  
 \*\*\* End of Report \*\*\*

### HPLC data of (+)-5j



## Display Report

## Analysis Info

Analysis Name D:\Data\user data\2017\JUNE 2017\09 JUNE\Dr A Bisai-AB-KNB-04-091\_1-A,2\_01\_1984.d  
 Method hrlcms\_pos\_mid\_tunemix.m  
 Sample Name Dr A Bisai-AB-KNB-04-091  
 Comment

Acquisition Date 6/9/2017 2:37:44 PM  
 Operator RUCHI SHRIVASTAVA  
 Instrument micrOTOF-Q II 10330

## Acquisition Parameter

|             |          |                       |           |                  |           |
|-------------|----------|-----------------------|-----------|------------------|-----------|
| Source Type | ESI      | Ion Polarity          | Positive  | Set Nebulizer    | 0.3 Bar   |
| Focus       | Active   | Set Capillary         | 4500 V    | Set Dry Heater   | 200 °C    |
| Scan Begin  | 50 m/z   | Set End Plate Offset  | -500 V    | Set Dry Gas      | 4.0 l/min |
| Scan End    | 3000 m/z | Set Collision Cell RF | 450.0 Vpp | Set Divert Valve | Waste     |

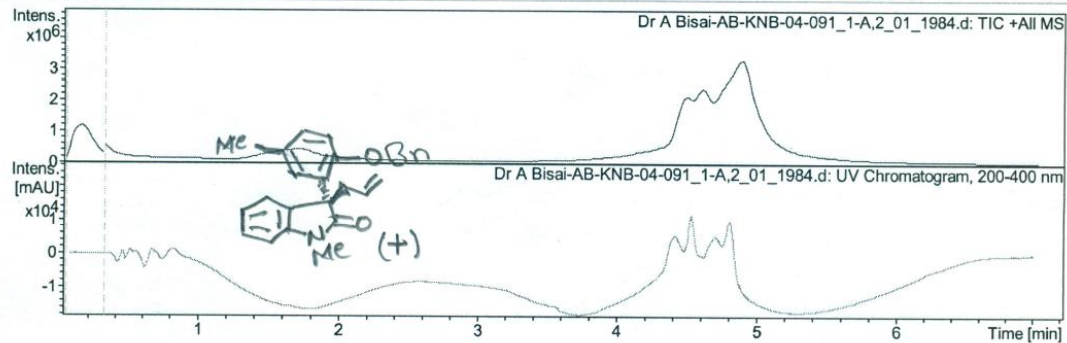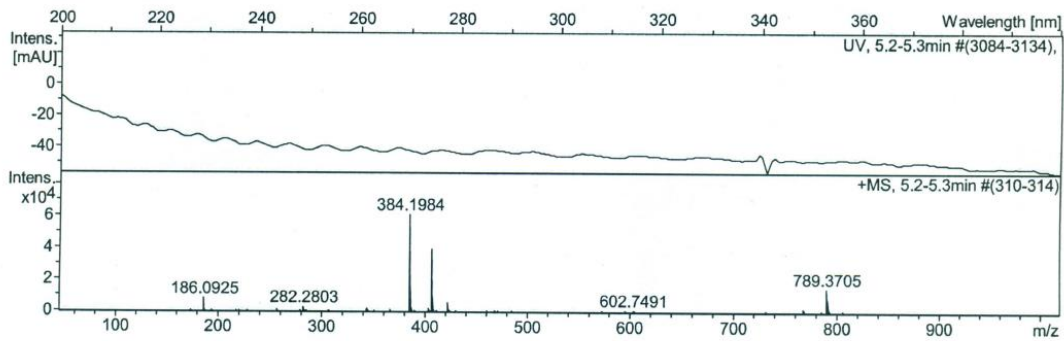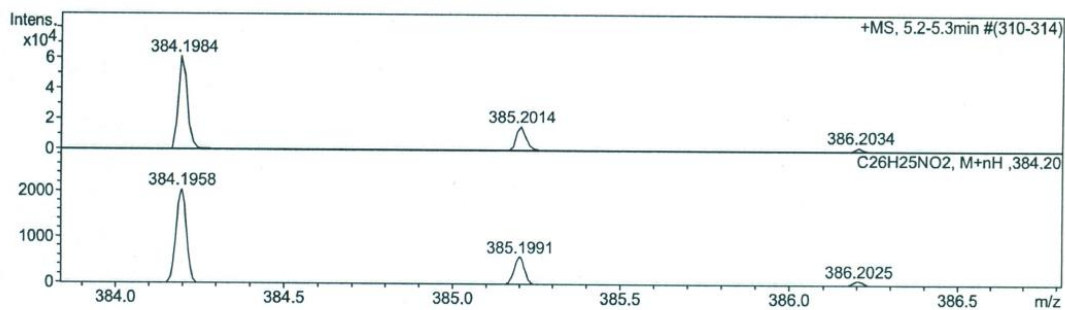Scanned copy of mass spectrum of **5k**

Data File C:\CHEM32\1\DATA\NARESH\2017-02-13AB-KNB-04-091-R3-40-1-254-40M.D  
 Sample Name: AB-KNB-04-091-R3-40-1-254-40M

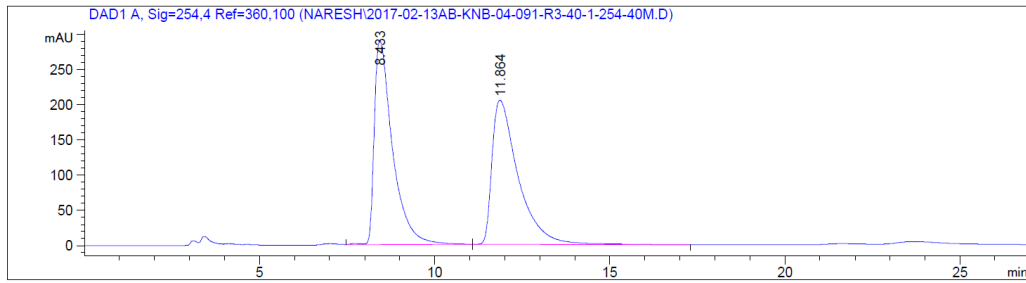

Signal 1: DAD1 A, Sig=254,4 Ref=360,100

| Peak # | RetTime [min] | Type | Width [min] | Area [mAU*s] | Height [mAU] | Area %  |
|--------|---------------|------|-------------|--------------|--------------|---------|
| 1      | 8.433         | BB   | 0.5357      | 1.04627e4    | 289.43933    | 49.5718 |
| 2      | 11.864        | BB   | 0.7729      | 1.06434e4    | 204.58707    | 50.4282 |

Totals : 2.11061e4 494.02640

=====  
 \*\*\* End of Report \*\*\*

### HPLC data of (±)-5k

Data File C:\CHEM32\1\DATA\NARESH\2017-02-14AB-KNB-04-099-R2-40-1-254-40M.D  
 Sample Name: AB-KNB-04-099-R2-40-1-254-40M

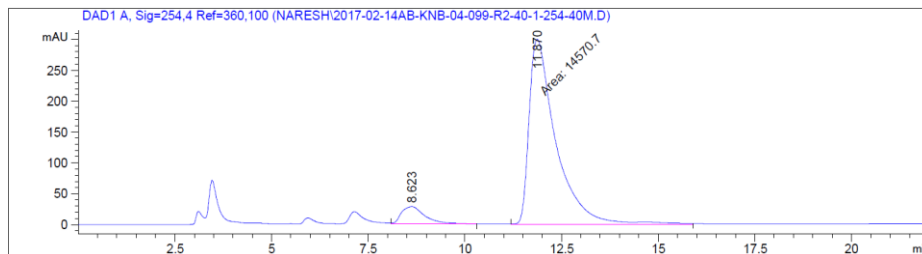

Signal 1: DAD1 A, Sig=254,4 Ref=360,100

| Peak # | RetTime [min] | Type | Width [min] | Area [mAU*s] | Height [mAU] | Area %  |
|--------|---------------|------|-------------|--------------|--------------|---------|
| 1      | 8.623         | VB   | 0.6409      | 1165.56616   | 28.04263     | 7.4069  |
| 2      | 11.870        | MM   | 0.8095      | 1.45707e4    | 299.97736    | 92.5931 |

Totals : 1.57362e4 328.01999

=====  
 \*\*\* End of Report \*\*\*

### HPLC data of (+)-5k

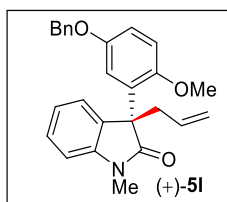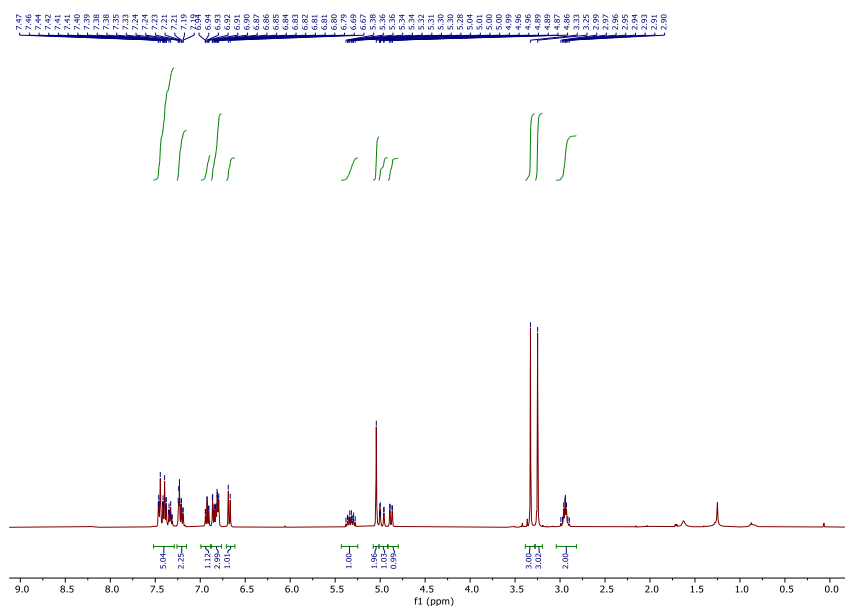

$^1\text{H}$  NMR (400 MHz,  $\text{CDCl}_3$ ) of compound (+)-**5I**

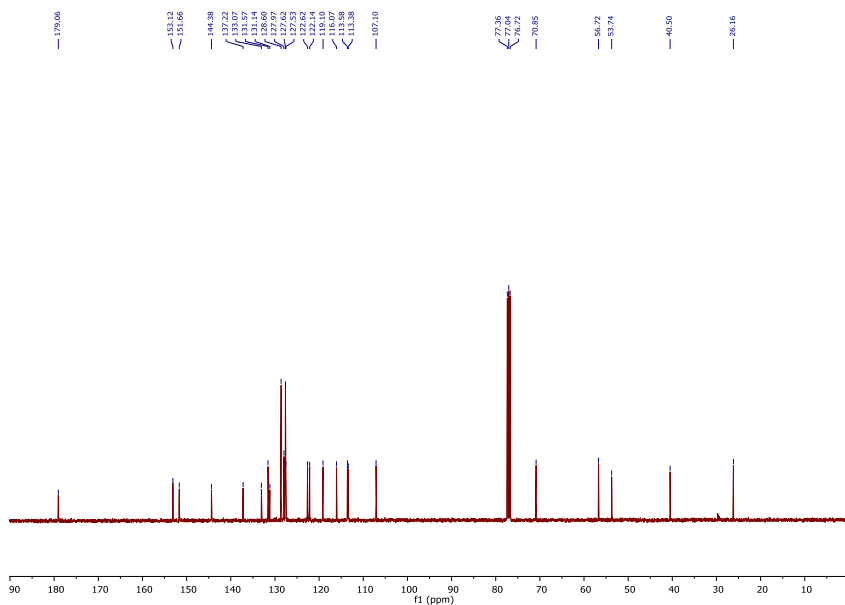

$^{13}\text{C}$  NMR (100 MHz,  $\text{CDCl}_3$ ) of compound (+)-**5I**



## Display Report

## Analysis Info

|               |                                                                        |                  |                      |
|---------------|------------------------------------------------------------------------|------------------|----------------------|
| Analysis Name | D:\Data\user data\2017\JUNE 2017\15 june\Dr.A.Bisai-AB-KNB-04-90-RPT.d | Acquisition Date | 6/15/2017 3:27:04 PM |
| Method        | Pos_Mid_tunemix.m                                                      | Operator         | RUCHI SHRIVASTAVA    |
| Sample Name   | AB-KNB-04-90-RPT                                                       | Instrument       | micrOTOF-Q II 10330  |
| Comment       |                                                                        |                  |                      |

## Acquisition Parameter

|             |          |                       |           |                  |           |
|-------------|----------|-----------------------|-----------|------------------|-----------|
| Source Type | ESI      | Ion Polarity          | Positive  | Set Nebulizer    | 0.3 Bar   |
| Focus       | Active   | Set Capillary         | 4500 V    | Set Dry Heater   | 200 °C    |
| Scan Begin  | 50 m/z   | Set End Plate Offset  | -500 V    | Set Dry Gas      | 4.0 l/min |
| Scan End    | 3000 m/z | Set Collision Cell RF | 450.0 Vpp | Set Divert Valve | Waste     |

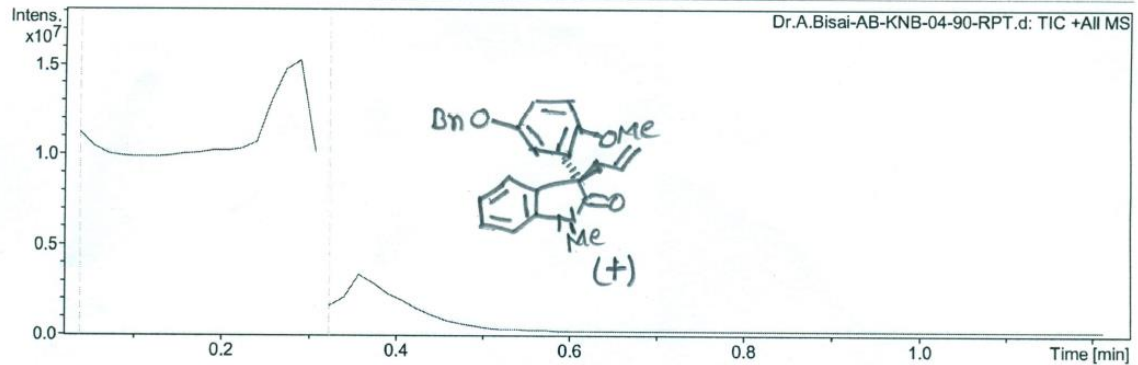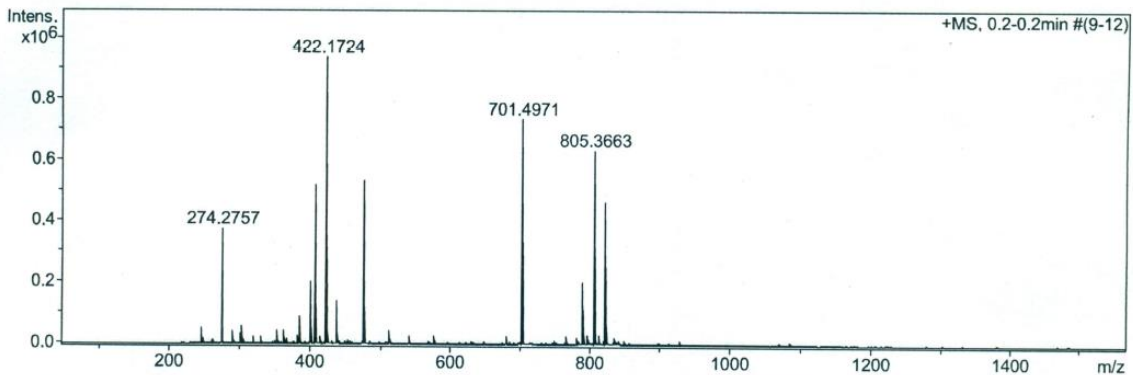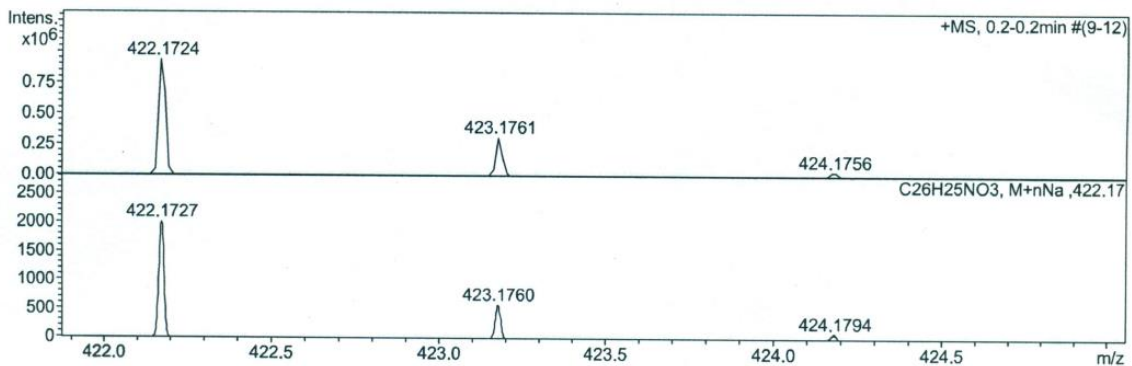

Scanned copy of mass spectrum of (+)-51

Data File C:\CHEM32\1\DATA\NARESH\2017-02-08AB-KNB-04-090-ADH-40-1-254-40M.D

Sample Name: AB-KNB-04-090-ADH-40-1-254-40M

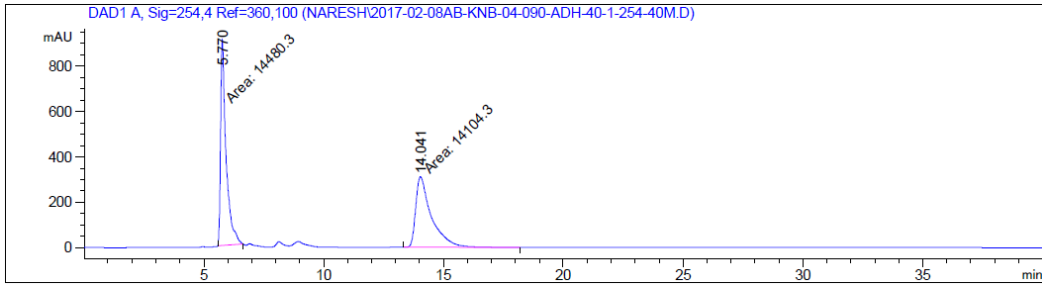

Signal 1: DAD1 A, Sig=254,4 Ref=360,100

| Peak # | RetTime [min] | Type | Width [min] | Area [mAU*s] | Height [mAU] | Area %  |
|--------|---------------|------|-------------|--------------|--------------|---------|
| 1      | 5.770         | MM   | 0.2658      | 1.44803e4    | 908.10840    | 50.6577 |
| 2      | 14.041        | MM   | 0.7575      | 1.41043e4    | 310.32068    | 49.3423 |

Totals : 2.85847e4 1218.42908

\*\*\* End of Report \*\*\*

## HPLC data of (±)-51

Data File C:\CHEM32\1\DATA\NARESH\2017-06-1520-01-18AB-KNB-04-100-AD-H-40-1-254-40M.D

Sample Name: AB-KNB-04-100-AD-H-40-1-254-40M

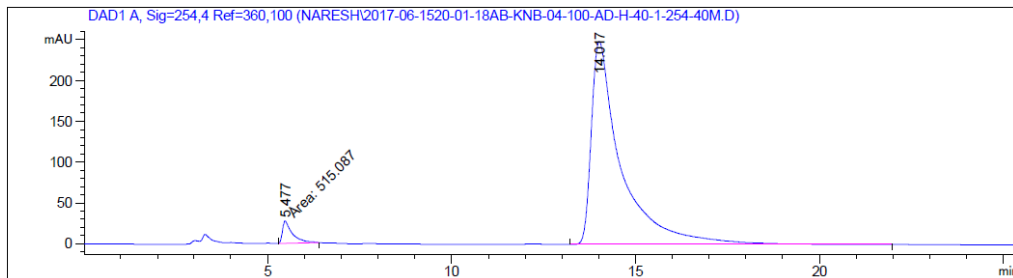

Signal 1: DAD1 A, Sig=254,4 Ref=360,100

| Peak # | RetTime [min] | Type | Width [min] | Area [mAU*s] | Height [mAU] | Area %  |
|--------|---------------|------|-------------|--------------|--------------|---------|
| 1      | 5.477         | MM   | 0.3121      | 515.08655    | 27.50998     | 3.5338  |
| 2      | 14.017        | BB   | 0.7855      | 1.40608e4    | 248.73813    | 96.4662 |

Totals : 1.45759e4 276.24810

\*\*\* End of Report \*\*\*

## HPLC data of (+)-51

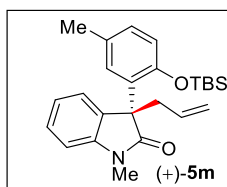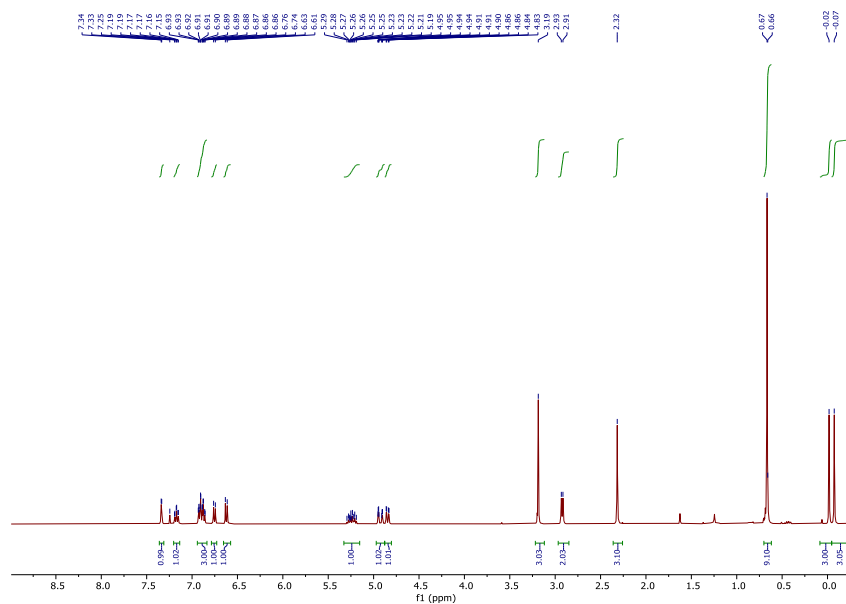

<sup>1</sup>H NMR (400 MHz, CDCl<sub>3</sub>) of compound (+)-5m

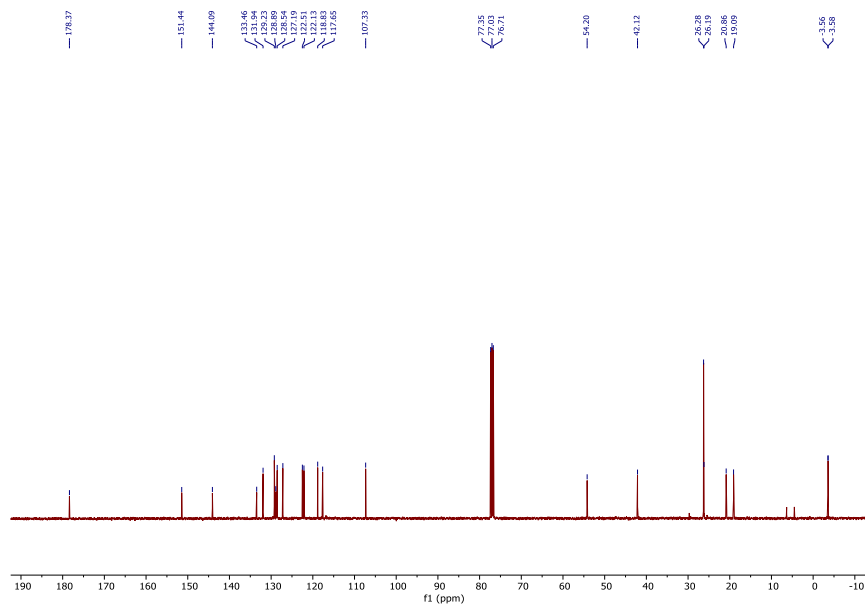

<sup>13</sup>C NMR (100 MHz, CDCl<sub>3</sub>) of compound (+)-5m

## Display Report

## Analysis Info

Analysis Name D:\Data\user data\2017\JUNE 2017\16 june\Dr.A.Bisai-AB-KNB-01-134.d  
Method Pos\_Mid\_tunemix.m  
Sample Name AB-KNB-01-134  
Comment

Acquisition Date 6/16/2017 4:33:36 PM  
Operator RUCHI SHRIVASTAVA  
Instrument micrOTOF-Q II 10330

## Acquisition Parameter

|             |          |                       |           |                  |           |
|-------------|----------|-----------------------|-----------|------------------|-----------|
| Source Type | ESI      | Ion Polarity          | Positive  | Set Nebulizer    | 0.3 Bar   |
| Focus       | Active   | Set Capillary         | 4500 V    | Set Dry Heater   | 200 °C    |
| Scan Begin  | 50 m/z   | Set End Plate Offset  | -500 V    | Set Dry Gas      | 4.0 l/min |
| Scan End    | 3000 m/z | Set Collision Cell RF | 450.0 Vpp | Set Divert Valve | Waste     |

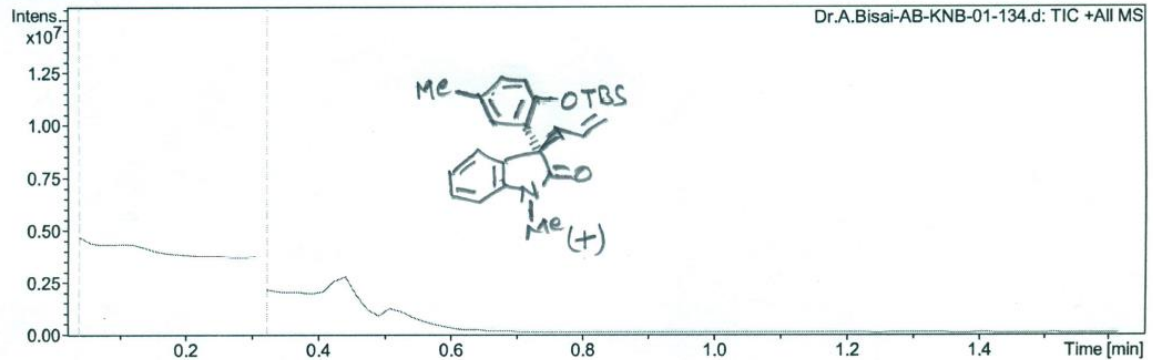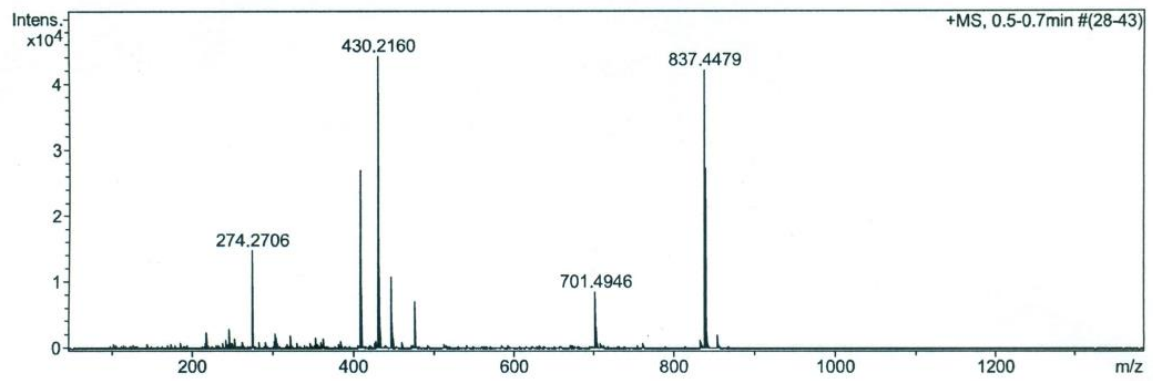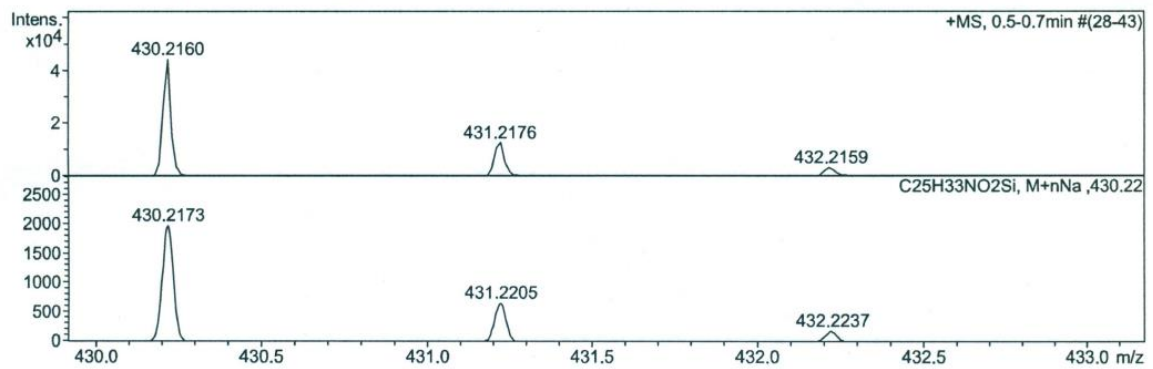Scanned copy of mass spectrum of **5m**

Data File C:\CHEM32\...TA\NARESH\2017-06-1518-01-12AB-KNB-04-134-2-NPS-IC-3-05-1-254-60M.D  
 Sample Name: AB-KNB-04-134-2-NPS-IC-3-05-1-254-60M

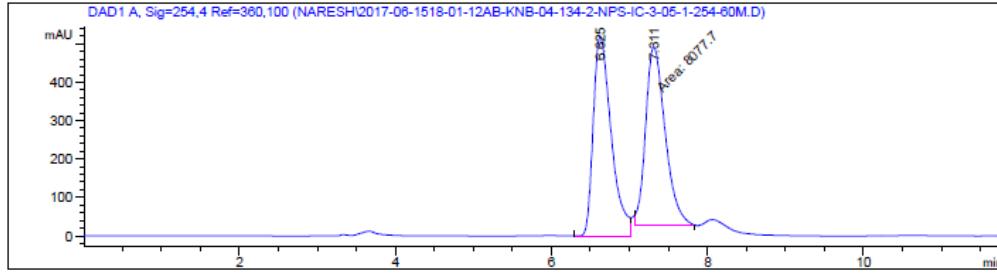

Signal 1: DAD1 A, Sig=254,4 Ref=360,100

| Peak # | RetTime [min] | Type | Width [min] | Area [mAU*s] | Height [mAU] | Area %  |
|--------|---------------|------|-------------|--------------|--------------|---------|
| 1      | 6.625         | BV   | 0.2446      | 8311.57715   | 519.60382    | 50.7135 |
| 2      | 7.311         | MM   | 0.2898      | 8077.69971   | 464.60922    | 49.2865 |

Totals : 1.63893e4 984.21304

\*\*\* End of Report \*\*\*

### HPLC data of (±)-5m

Data File C:\CHEM32\1\DATA\NARESH\2017-02-24AB-KNB-04-135-R-IC-3-5-1-254-30M.D  
 Sample Name: AB-KNB-04-135-R-IC-3-5-1-254-30M

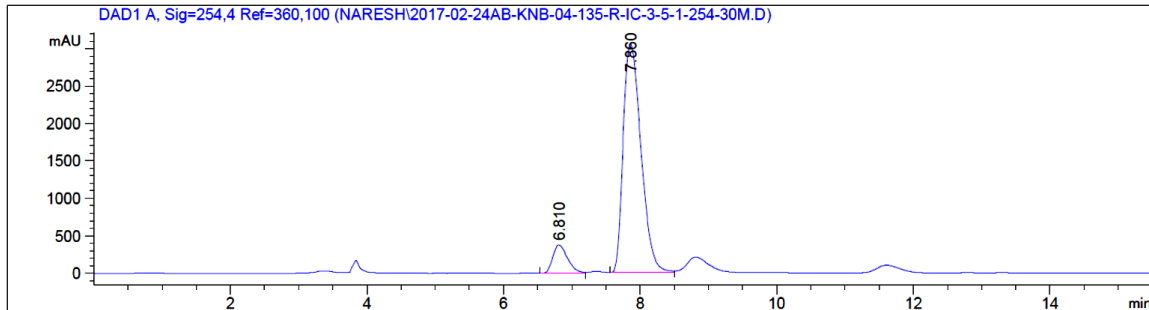

Signal 1: DAD1 A, Sig=254,4 Ref=360,100

| Peak # | RetTime [min] | Type | Width [min] | Area [mAU*s] | Height [mAU] | Area %  |
|--------|---------------|------|-------------|--------------|--------------|---------|
| 1      | 6.810         | BV   | 0.2292      | 5558.22168   | 374.46814    | 9.1051  |
| 2      | 7.860         | BV   | 0.2839      | 5.54872e4    | 3055.65625   | 90.8949 |

Totals : 6.10454e4 3430.12439

\*\*\* End of Report \*\*\*

### HPLC data of (+)-5m

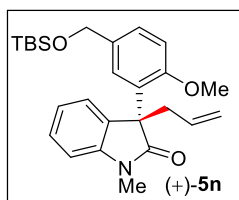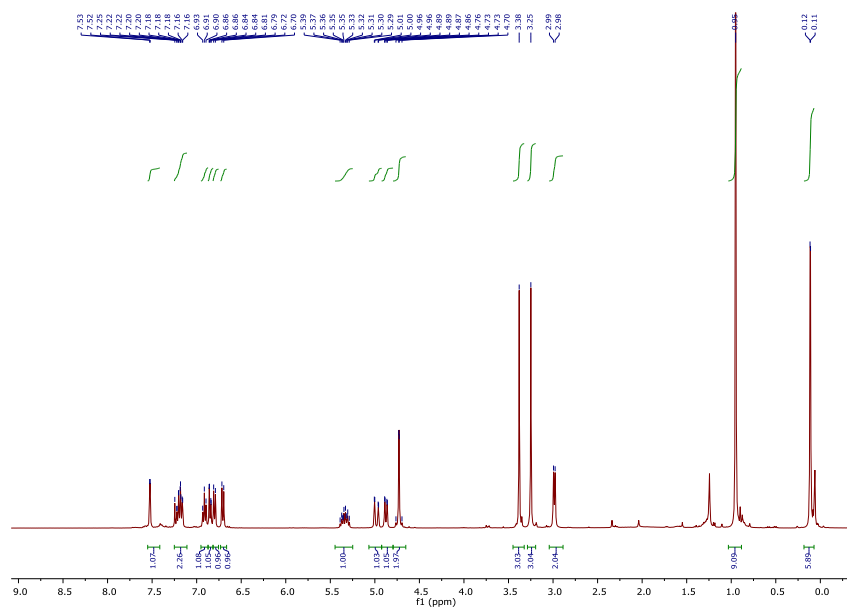 $^1\text{H}$  NMR (400 MHz,  $\text{CDCl}_3$ ) of compound (+)-5n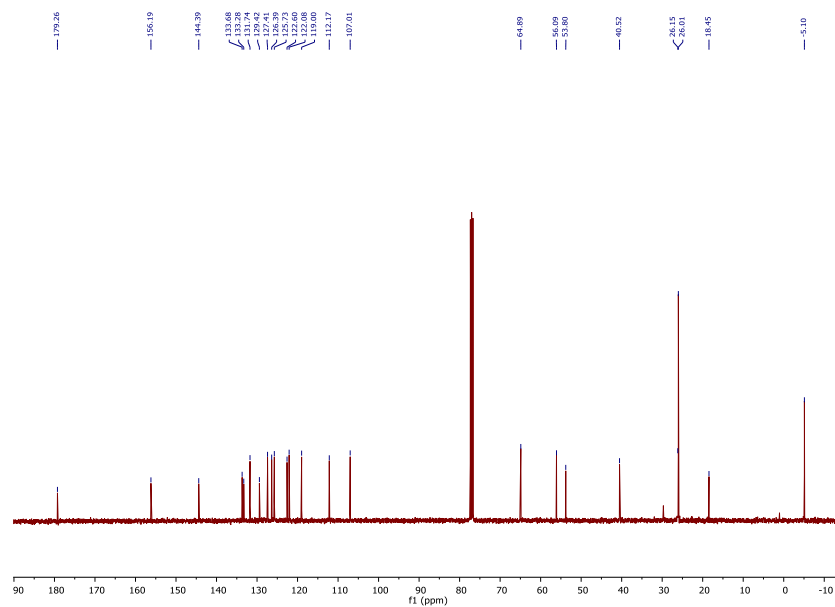 $^{13}\text{C}$  NMR (100 MHz,  $\text{CDCl}_3$ ) of compound (+)-5n

## Display Report

|                      |                                                                     |                  |                      |
|----------------------|---------------------------------------------------------------------|------------------|----------------------|
| <b>Analysis Info</b> |                                                                     | Acquisition Date | 6/16/2017 4:29:31 PM |
| Analysis Name        | D:\Data\user data\2017\JUNE 2017\16 june\Dr.A.Bisai-AB-KNB-01-132.d | Operator         | RUCHI SHRIVASTAVA    |
| Method               | Pos_Mid_tunemix.m                                                   | Instrument       | micrOTOF-Q II 10330  |
| Sample Name          | AB-KNB-01-132                                                       |                  |                      |
| Comment              |                                                                     |                  |                      |

**Acquisition Parameter**

|             |          |                       |           |                  |           |
|-------------|----------|-----------------------|-----------|------------------|-----------|
| Source Type | ESI      | Ion Polarity          | Positive  | Set Nebulizer    | 0.3 Bar   |
| Focus       | Active   | Set Capillary         | 4500 V    | Set Dry Heater   | 200 °C    |
| Scan Begin  | 50 m/z   | Set End Plate Offset  | -500 V    | Set Dry Gas      | 4.0 l/min |
| Scan End    | 3000 m/z | Set Collision Cell RF | 450.0 Vpp | Set Divert Valve | Waste     |

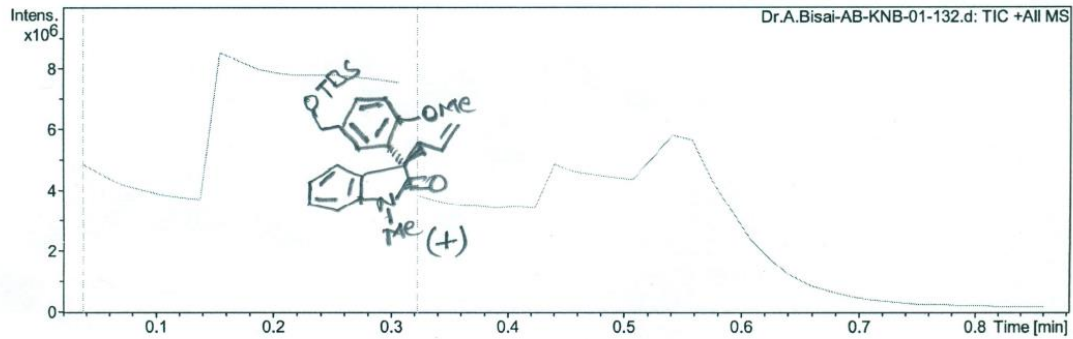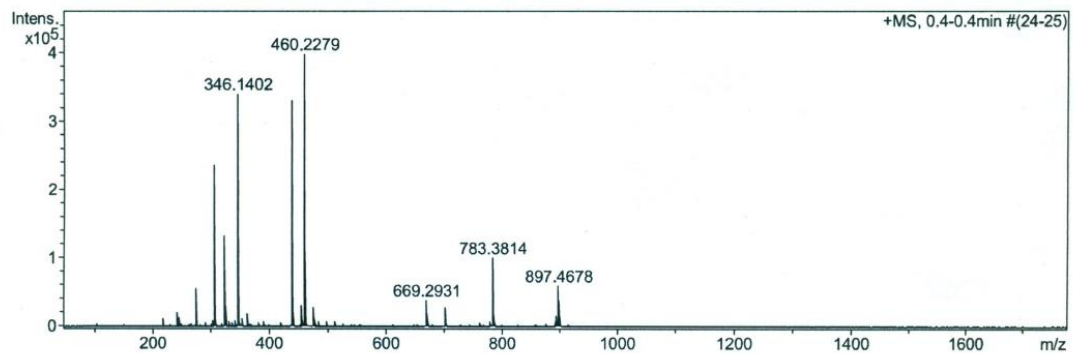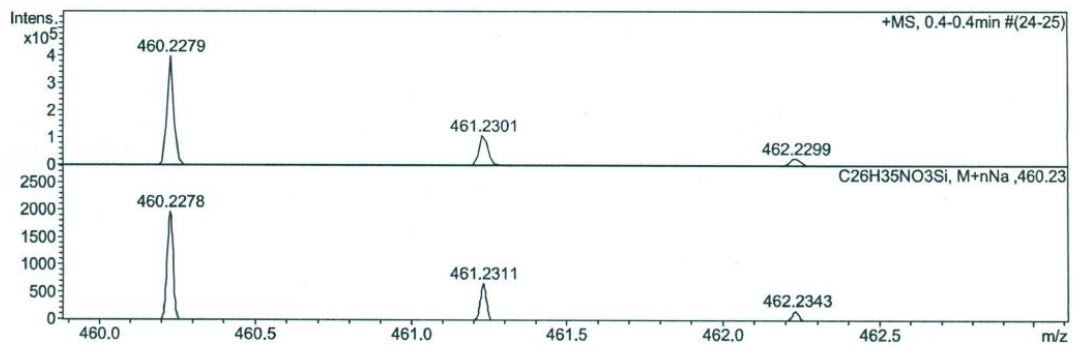Scanned copy of mass spectrum of **5n**

Data File C:\CHEM32\1\DATA\NARESH\2017-02-24AB-KNB-04-132-IC-3-15-1-254-30M.D

Sample Name: AB-KNB-04-132-IC-3-15-1-254-30M

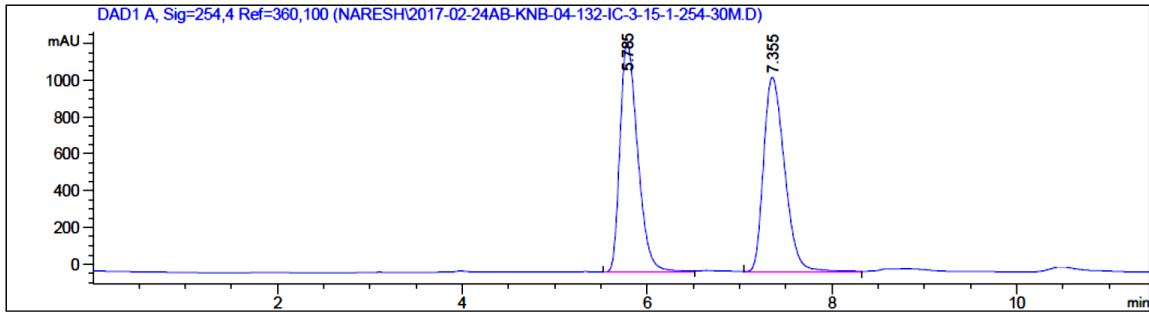

Signal 1: DAD1 A, Sig=254,4 Ref=360,100

| Peak # | RetTime [min] | Type | Width [min] | Area [mAU*s] | Height [mAU] | Area %  |
|--------|---------------|------|-------------|--------------|--------------|---------|
| 1      | 5.785         | BV   | 0.2057      | 1.65776e4    | 1242.45691   | 49.9095 |
| 2      | 7.355         | VB   | 0.2477      | 1.66377e4    | 1056.90479   | 50.0905 |

Totals : 3.32153e4 2299.36169

HPLC data of (±)-5n

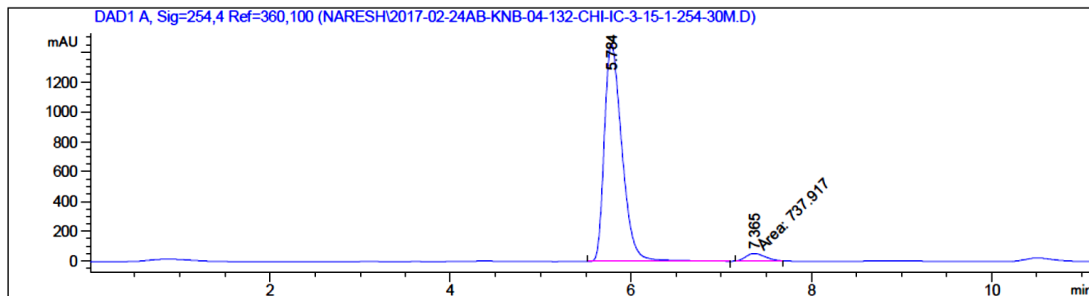

Signal 1: DAD1 A, Sig=254,4 Ref=360,100

| Peak # | RetTime [min] | Type | Width [min] | Area [mAU*s] | Height [mAU] | Area %  |
|--------|---------------|------|-------------|--------------|--------------|---------|
| 1      | 5.784         | BV   | 0.2090      | 1.98198e4    | 1454.33374   | 96.4105 |
| 2      | 7.365         | MM   | 0.2466      | 737.91748    | 49.86928     | 3.5895  |

Totals : 2.05577e4 1504.20302

\*\*\* End of Report \*\*\*

HPLC data of (+)-5n



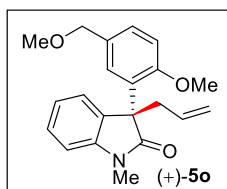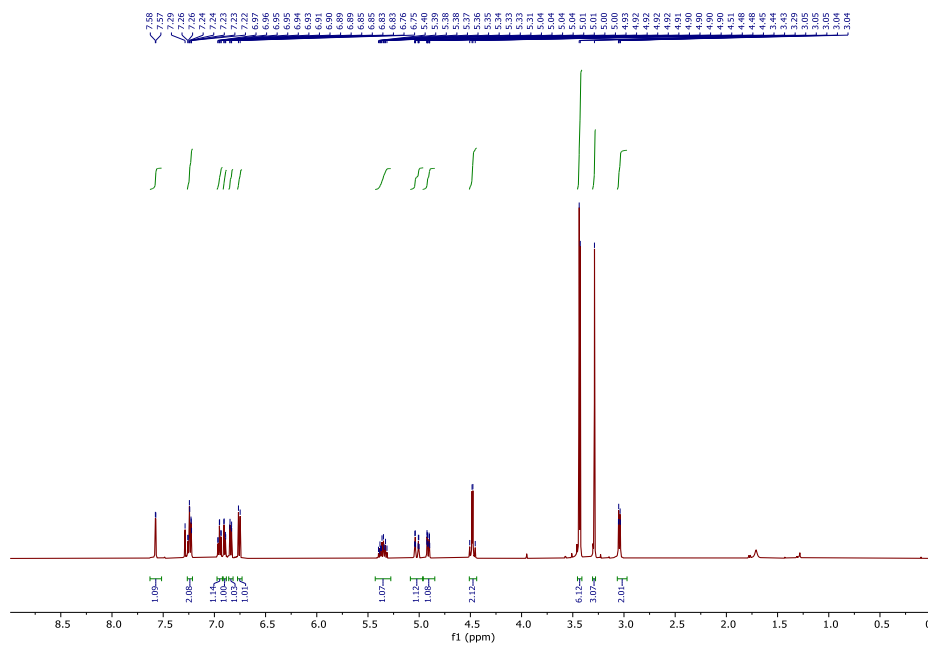

$^1\text{H}$  NMR (500 MHz,  $\text{CDCl}_3$ ) of compound (+)-**5o**

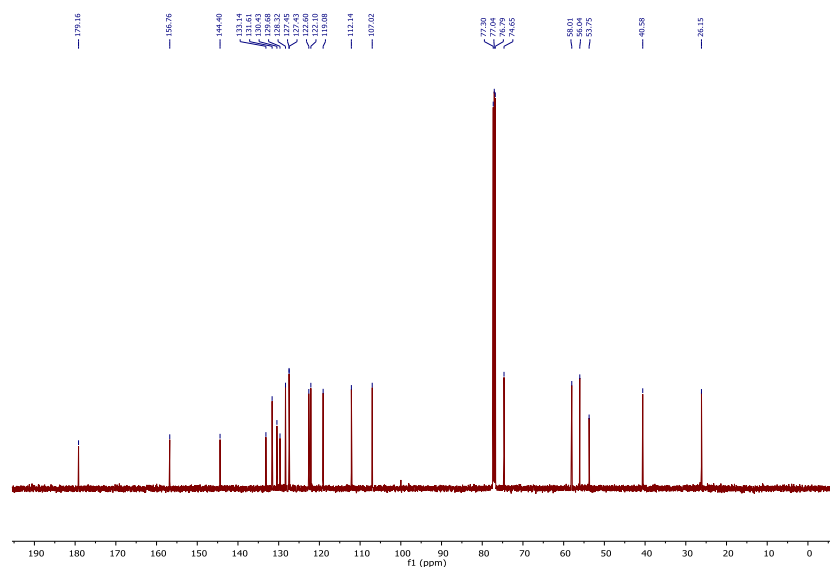

$^{13}\text{C}$  NMR (125 MHz,  $\text{CDCl}_3$ ) of compound (+)-**5o**

## Display Report

## Analysis Info

Analysis Name D:\Data\user data\2017\JUNE 2017\15 june\Dr A Bisai-AB-KNB-04-38R\_1-C,3\_01\_2107.d  
 Method hrlcms\_pos\_mid\_tunemix.m  
 Sample Name Dr A Bisai-AB-KNB-04-38R  
 Comment

Acquisition Date 6/15/2017 2:50:56 PM

Operator RUCHI SHRIVASTAVA

Instrument micrOTOF-Q II 10330

## Acquisition Parameter

|             |          |                       |           |                  |           |
|-------------|----------|-----------------------|-----------|------------------|-----------|
| Source Type | ESI      | Ion Polarity          | Positive  | Set Nebulizer    | 0.3 Bar   |
| Focus       | Active   | Set Capillary         | 4500 V    | Set Dry Heater   | 200 °C    |
| Scan Begin  | 50 m/z   | Set End Plate Offset  | -500 V    | Set Dry Gas      | 4.0 l/min |
| Scan End    | 3000 m/z | Set Collision Cell RF | 450.0 Vpp | Set Divert Valve | Waste     |

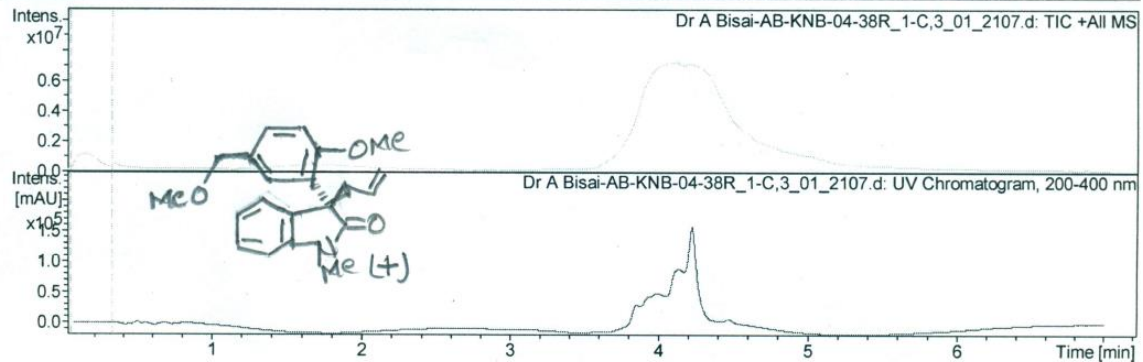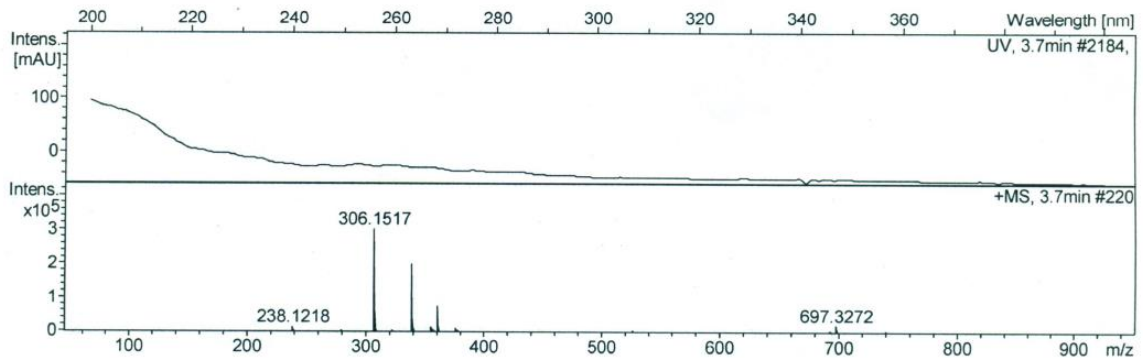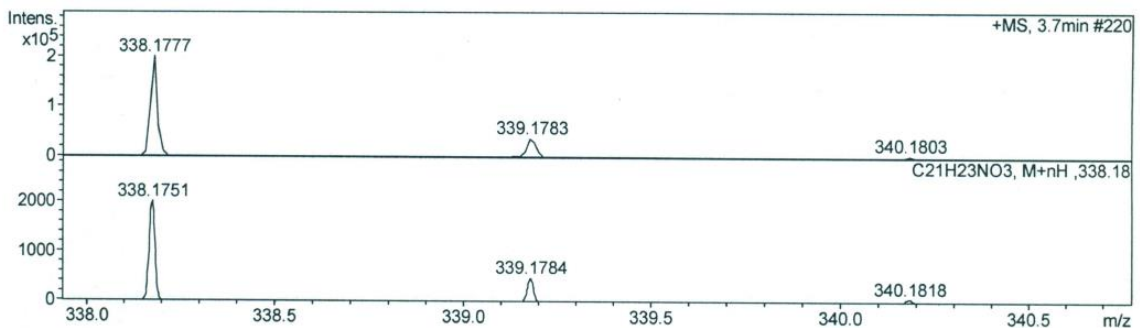Scanned copy of mass spectrum of **50**

Data File C:\CHEM32\1\DATA\NARESH\2017-01-02AB-KNB-04-038-AD-H-40-1-254-40M.D

Sample Name: AB-KNB-04-038-AD-H-40-1-254-40M

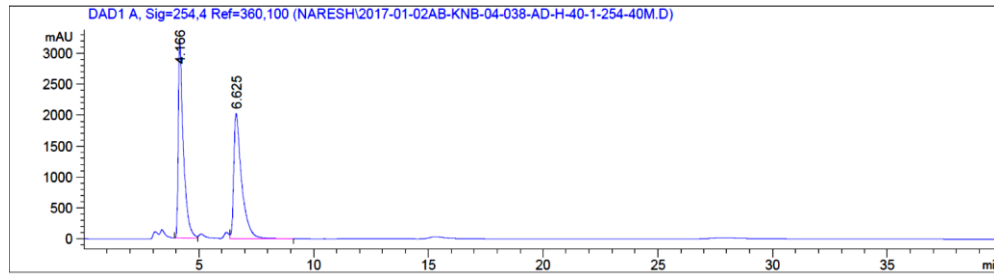

Signal 1: DAD1 A, Sig=254,4 Ref=360,100

| Peak # | RetTime [min] | Type | Width [min] | Area [mAU*s] | Height [mAU] | Area %  |
|--------|---------------|------|-------------|--------------|--------------|---------|
| 1      | 4.166         | BV   | 0.2144      | 4.91079e4    | 3210.89624   | 50.5198 |
| 2      | 6.625         | VB   | 0.3410      | 4.80972e4    | 2025.46716   | 49.4802 |

Totals : 9.72051e4 5236.36340

## HPLC data of (±)-5o

Data File C:\CHEM32\1\DATA\NARESH\2017-01-02AB-KNB-04-040-AD-H-40-1-254-40M.D

Sample Name: AB-KNB-04-040-AD-H-40-1-254-40M

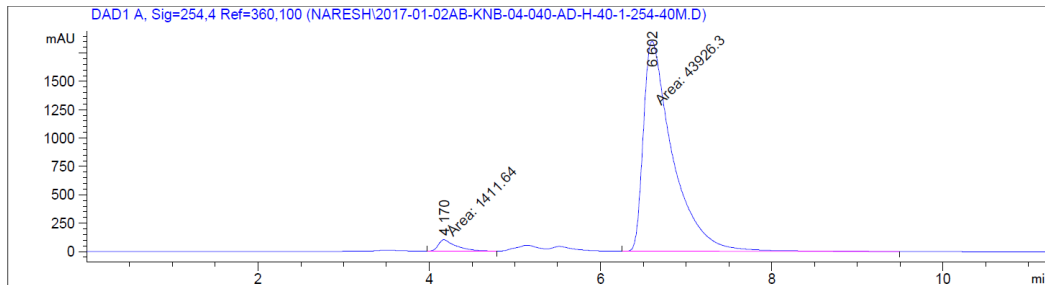

Signal 1: DAD1 A, Sig=254,4 Ref=360,100

| Peak # | RetTime [min] | Type | Width [min] | Area [mAU*s] | Height [mAU] | Area %  |
|--------|---------------|------|-------------|--------------|--------------|---------|
| 1      | 4.170         | MM   | 0.2359      | 1411.64465   | 99.72189     | 3.1136  |
| 2      | 6.602         | MM   | 0.3949      | 4.39263e4    | 1853.67590   | 96.8864 |

Totals : 4.53379e4 1953.39780

\*\*\* End of Report \*\*\*

## HPLC data of (+)-5o

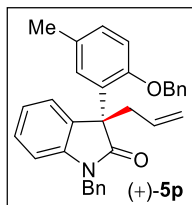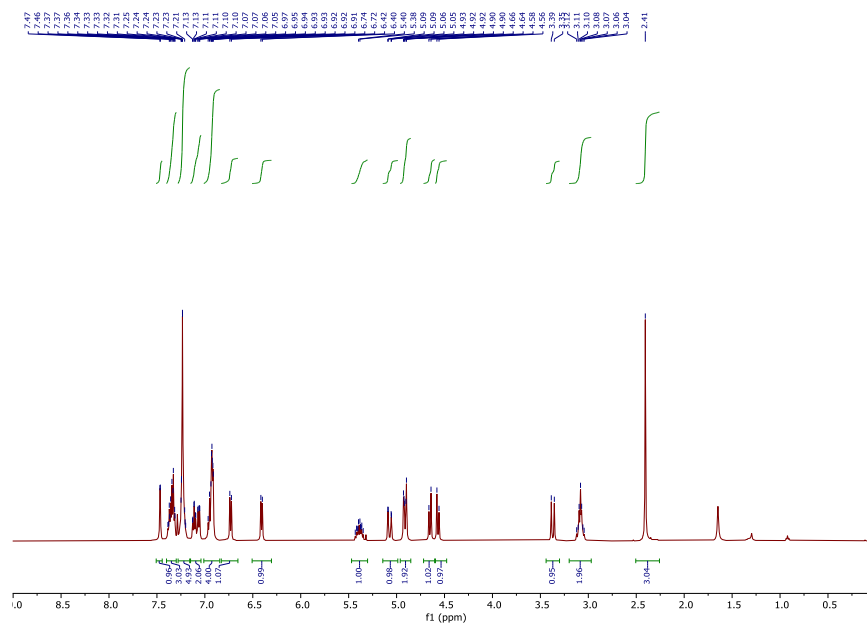 $^1\text{H}$  NMR (500 MHz,  $\text{CDCl}_3$ ) of compound (+)-**5p**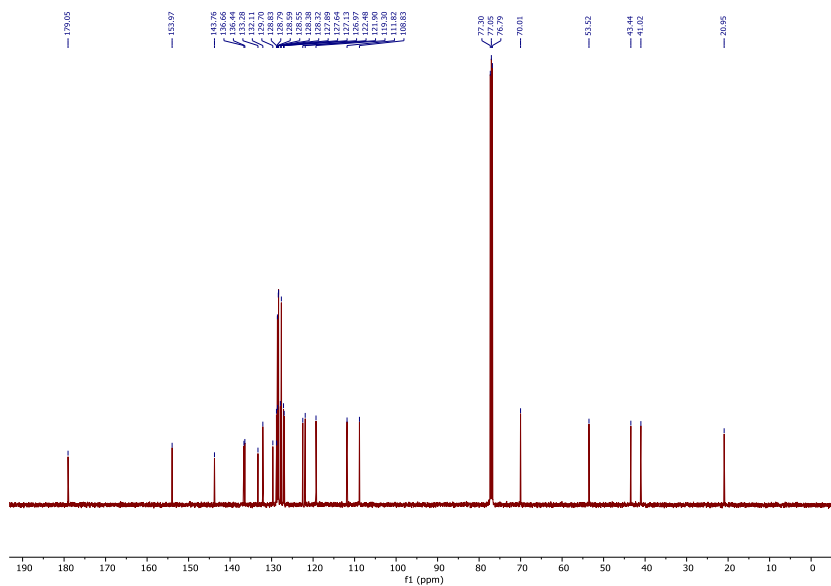 $^{13}\text{C}$  NMR (125 MHz,  $\text{CDCl}_3$ ) of compound (+)-**5p**

## Display Report

## Analysis Info

Analysis Name D:\Data\user data\2017\JUNE 2017\14 June\Dr.A.Bisai-AB-KNB-04-54-R\_1-B,2\_01\_2071.d  
 Method hrlcms\_pos\_mid\_tunemix.m  
 Sample Name Dr.A.Bisai-AB-KNB-04-54-R  
 Comment

Acquisition Date 6/14/2017 12:47:47 PM  
 Operator RUCHI SHRIVASTAVA  
 Instrument micrOTOF-Q II 10330

## Acquisition Parameter

|             |          |                       |           |                  |           |
|-------------|----------|-----------------------|-----------|------------------|-----------|
| Source Type | ESI      | Ion Polarity          | Positive  | Set Nebulizer    | 0.3 Bar   |
| Focus       | Active   | Set Capillary         | 4500 V    | Set Dry Heater   | 200 °C    |
| Scan Begin  | 50 m/z   | Set End Plate Offset  | -500 V    | Set Dry Gas      | 4.0 l/min |
| Scan End    | 3000 m/z | Set Collision Cell RF | 450.0 Vpp | Set Divert Valve | Waste     |

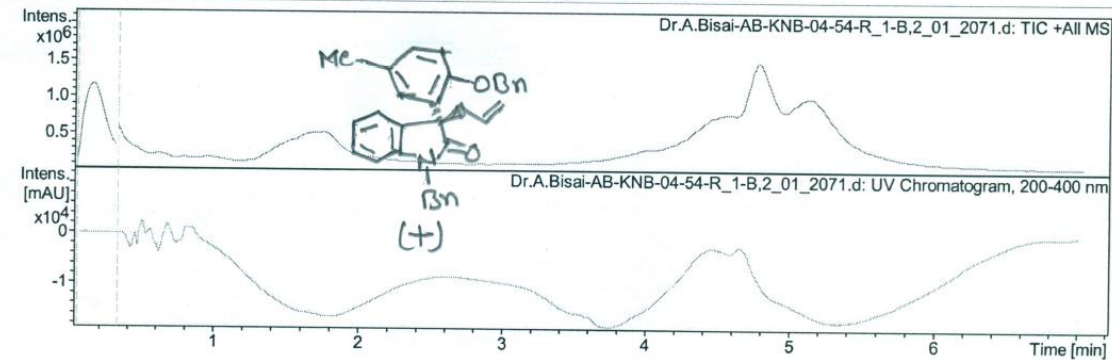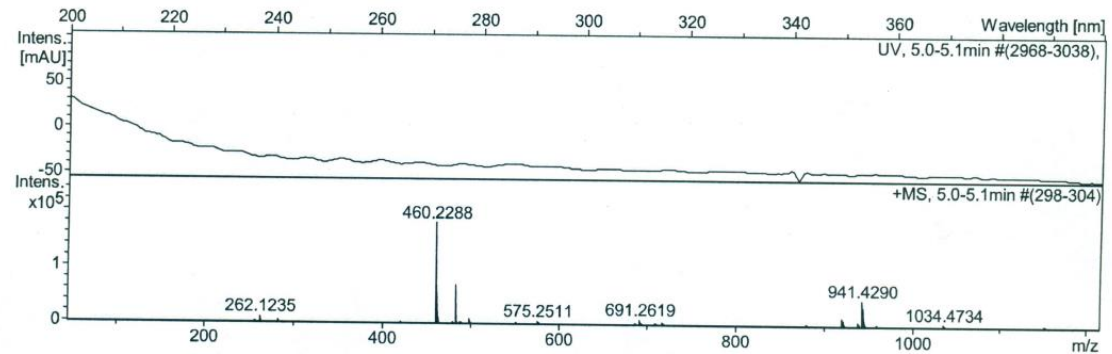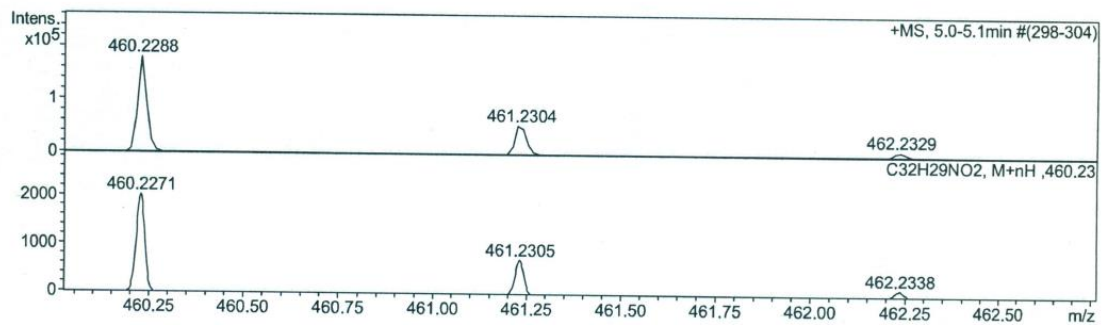

Data File C:\CHEM32\1\DATA\NARESH\2017-02-13AB-KNB-04-091-R3-40-1-254-40M.D  
 Sample Name: AB-KNB-04-091-R3-40-1-254-40M

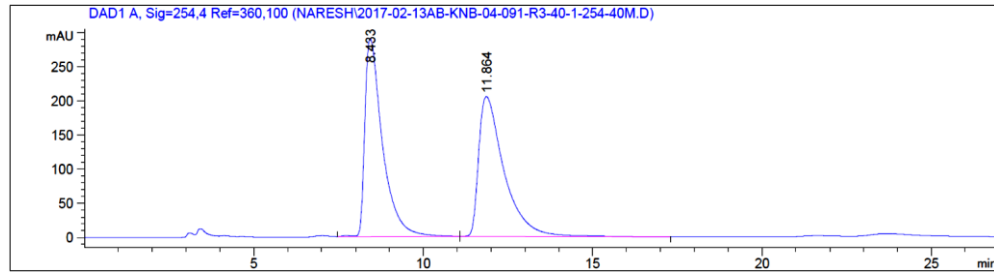

Signal 1: DAD1 A, Sig=254,4 Ref=360,100

| Peak # | RetTime [min] | Type | Width [min] | Area [mAU*s] | Height [mAU] | Area %  |
|--------|---------------|------|-------------|--------------|--------------|---------|
| 1      | 8.433         | BB   | 0.5357      | 1.04627e4    | 289.43933    | 49.5718 |
| 2      | 11.864        | BB   | 0.7729      | 1.06434e4    | 204.58707    | 50.4282 |

Totals : 2.11061e4 494.02640

=====  
 \*\*\* End of Report \*\*\*

### HPLC data of (±)-5p

Data File C:\CHEM32\1\DATA\NARESH\2017-02-14AB-KNB-04-099-R2-40-1-254-40M.D  
 Sample Name: AB-KNB-04-099-R2-40-1-254-40M

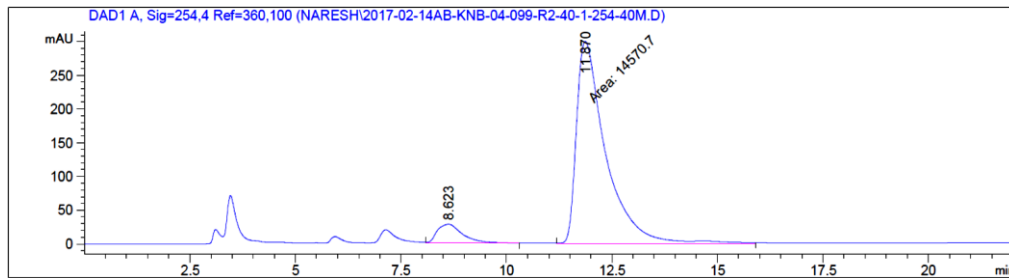

Signal 1: DAD1 A, Sig=254,4 Ref=360,100

| Peak # | RetTime [min] | Type | Width [min] | Area [mAU*s] | Height [mAU] | Area %  |
|--------|---------------|------|-------------|--------------|--------------|---------|
| 1      | 8.623         | VB   | 0.6409      | 1165.56616   | 28.04263     | 7.4069  |
| 2      | 11.870        | MM   | 0.8095      | 1.45707e4    | 299.97736    | 92.5931 |

Totals : 1.57362e4 328.01999

### HPLC data of (+)-5p

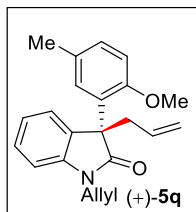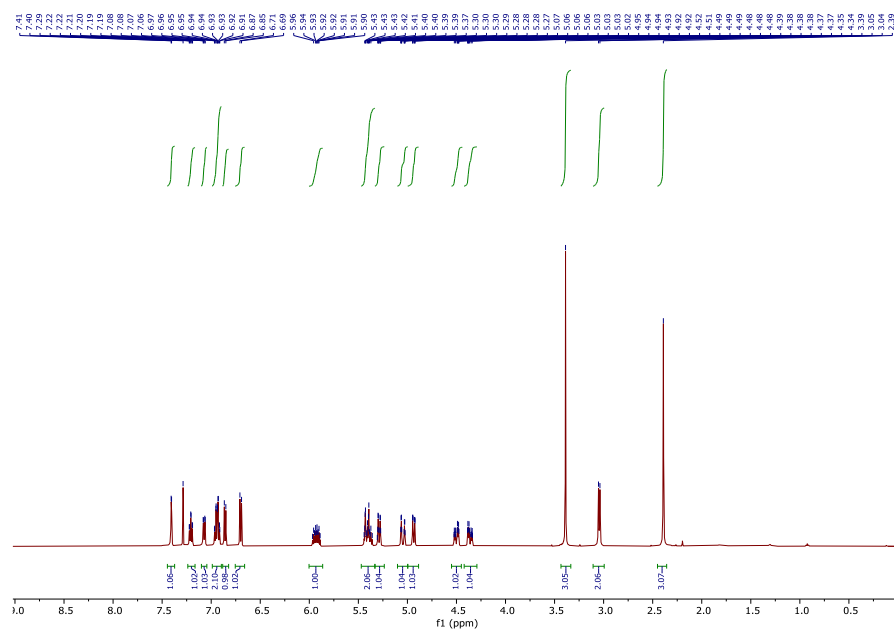

$^1\text{H}$  NMR (500 MHz,  $\text{CDCl}_3$ ) of compound (+)-5q

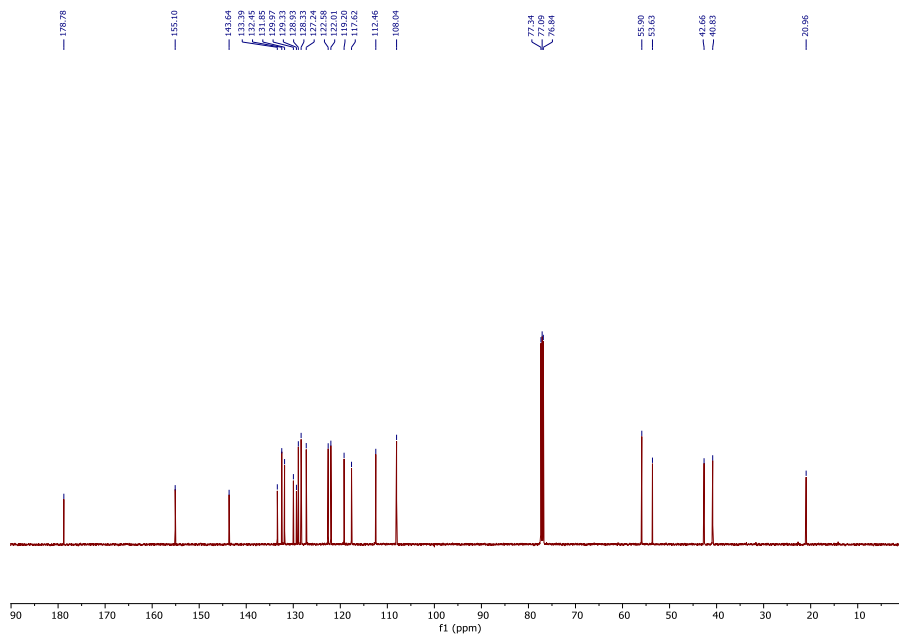

$^{13}\text{C}$  NMR (125 MHz,  $\text{CDCl}_3$ ) of compound (+)-5q

## Display Report

## Analysis Info

Analysis Name D:\Data\user data\2017\JUNE 2017\09 JUNE\Dr A Bisai-AB-KNB-04-095-R\_1-A,4\_01\_1986.d  
 Method hrlcms\_pos\_mid\_tunemix.m  
 Sample Name Dr A Bisai-AB-KNB-04-095-R  
 Comment

Acquisition Date 6/9/2017 2:54:02 PM  
 Operator RUCHI SHRIVASTAVA  
 Instrument micrOTOF-Q II 10330

## Acquisition Parameter

|             |          |                       |           |                  |           |
|-------------|----------|-----------------------|-----------|------------------|-----------|
| Source Type | ESI      | Ion Polarity          | Positive  | Set Nebulizer    | 0.3 Bar   |
| Focus       | Active   | Set Capillary         | 4500 V    | Set Dry Heater   | 200 °C    |
| Scan Begin  | 50 m/z   | Set End Plate Offset  | -500 V    | Set Dry Gas      | 4.0 l/min |
| Scan End    | 3000 m/z | Set Collision Cell RF | 450.0 Vpp | Set Divert Valve | Waste     |

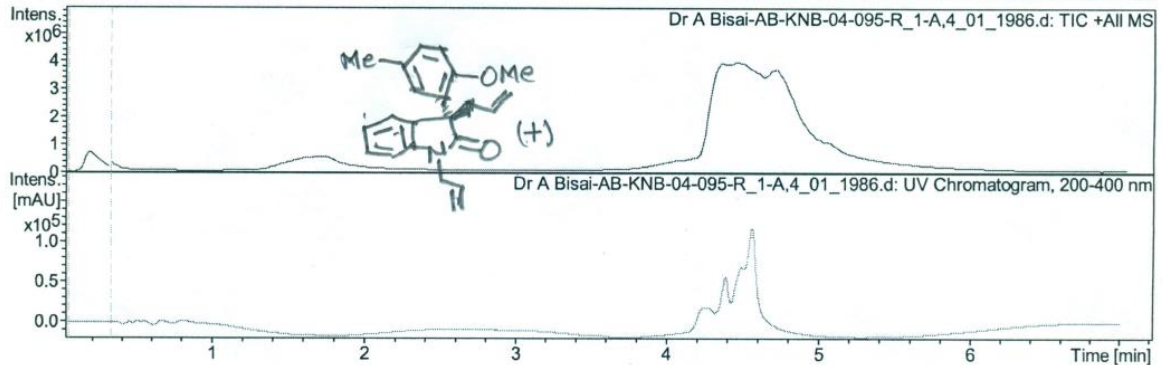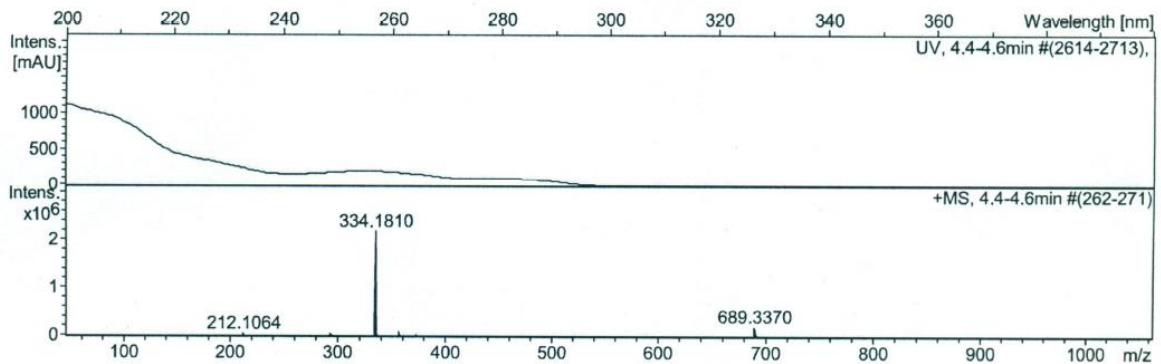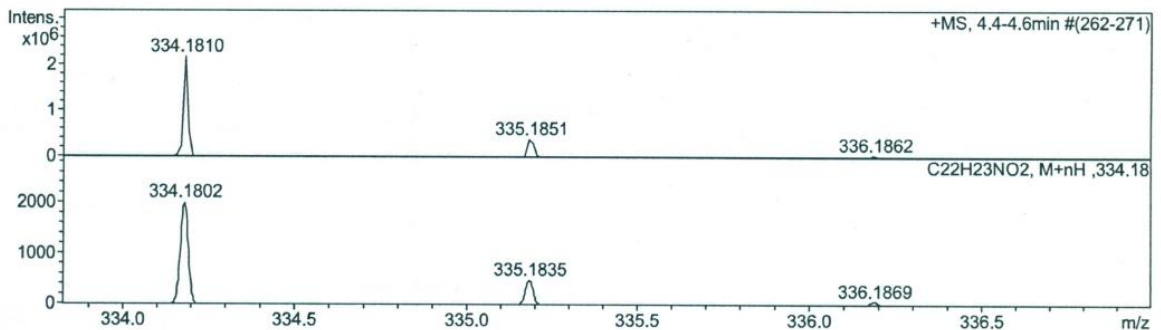



Data File C:\CHEM32\1\DATA\NARESH\2017-02-11AB-KN-04-095-ADH-30-1-ALL-DAD-50M.D

Sample Name: AB-KN-04-095-ADH-30-1-ALL-DAD-50M

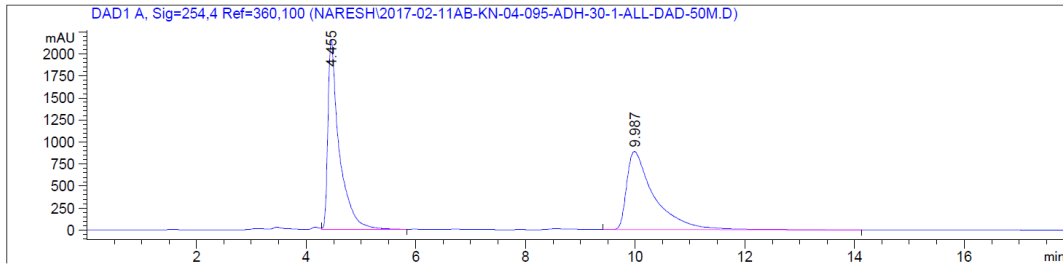

Signal 1: DAD1 A, Sig=254,4 Ref=360,100

| Peak # | RetTime [min] | Type | Width [min] | Area [mAU*s] | Height [mAU] | Area %  |
|--------|---------------|------|-------------|--------------|--------------|---------|
| 1      | 4.455         | VB   | 0.1999      | 3.09807e4    | 2153.02539   | 49.9962 |
| 2      | 9.987         | BBA  | 0.5004      | 3.09853e4    | 885.13470    | 50.0038 |

Totals : 6.19660e4 3038.16010

## HPLC data of (±)-5q

Data File C:\CHEM32\1\DATA\NARESH\2017-02-11AB-KN-04-101-ADH-30-1-ALL-DAD-50M.D

Sample Name: AB-KN-04-101-ADH-30-1-ALL-DAD-50M

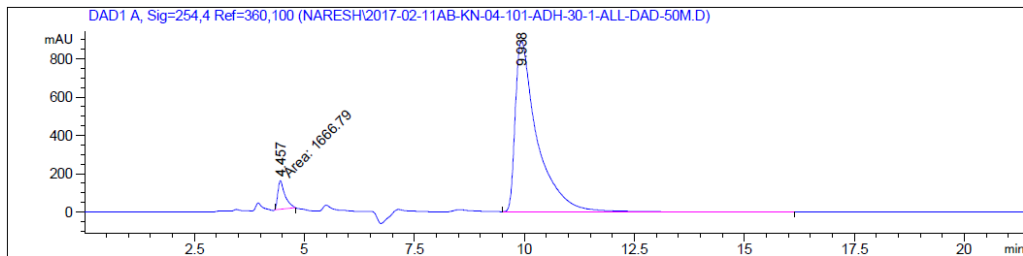

Signal 1: DAD1 A, Sig=254,4 Ref=360,100

| Peak # | RetTime [min] | Type | Width [min] | Area [mAU*s] | Height [mAU] | Area %  |
|--------|---------------|------|-------------|--------------|--------------|---------|
| 1      | 4.457         | MM   | 0.1867      | 1666.78967   | 148.75523    | 5.1045  |
| 2      | 9.938         | VB   | 0.4939      | 3.09868e4    | 895.06738    | 94.8955 |

Totals : 3.26536e4 1043.82262

## HPLC data of (+)-5q



## Display Report

**Analysis Info**  
Analysis Name D:\Data\user data\2017\JUNE 2017\15 june\Dr.A.Bisai-AB-KNB-04-96-RPT.d  
Method Pos\_Mid\_tunemix.m  
Sample Name AB-KNB-04-96-RPT  
Comment  
Acquisition Date 6/15/2017 3:30:51 PM  
Operator RUCHI SHRIVASTAVA  
Instrument micrOTOF-Q II 10330

**Acquisition Parameter**

|             |          |                       |           |                  |           |
|-------------|----------|-----------------------|-----------|------------------|-----------|
| Source Type | ESI      | Ion Polarity          | Positive  | Set Nebulizer    | 0.3 Bar   |
| Focus       | Active   | Set Capillary         | 4500 V    | Set Dry Heater   | 200 °C    |
| Scan Begin  | 50 m/z   | Set End Plate Offset  | -500 V    | Set Dry Gas      | 4.0 l/min |
| Scan End    | 3000 m/z | Set Collision Cell RF | 450.0 Vpp | Set Divert Valve | Waste     |

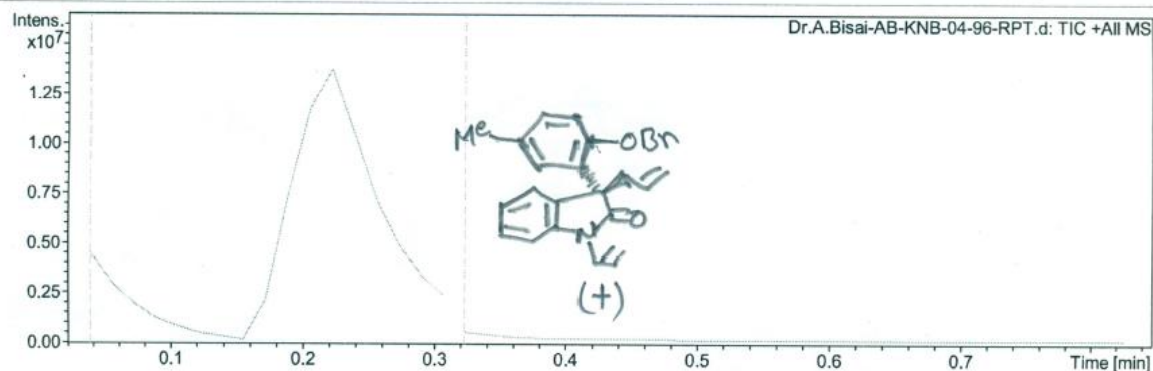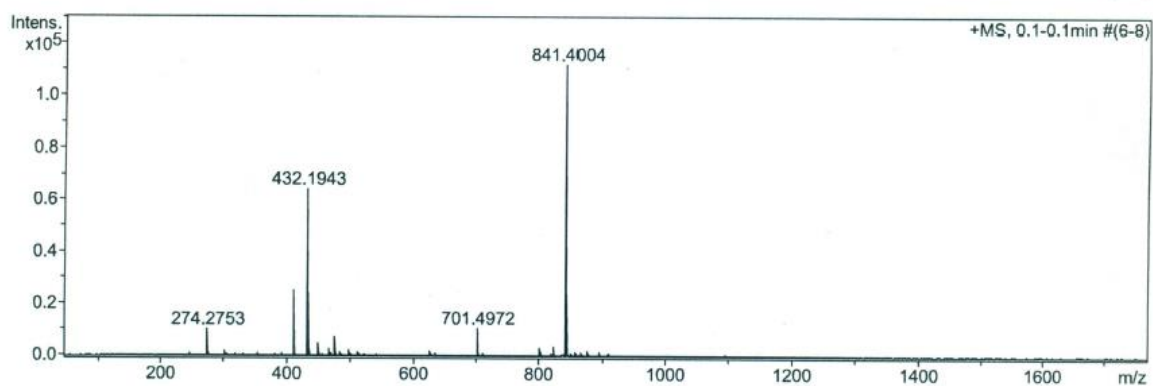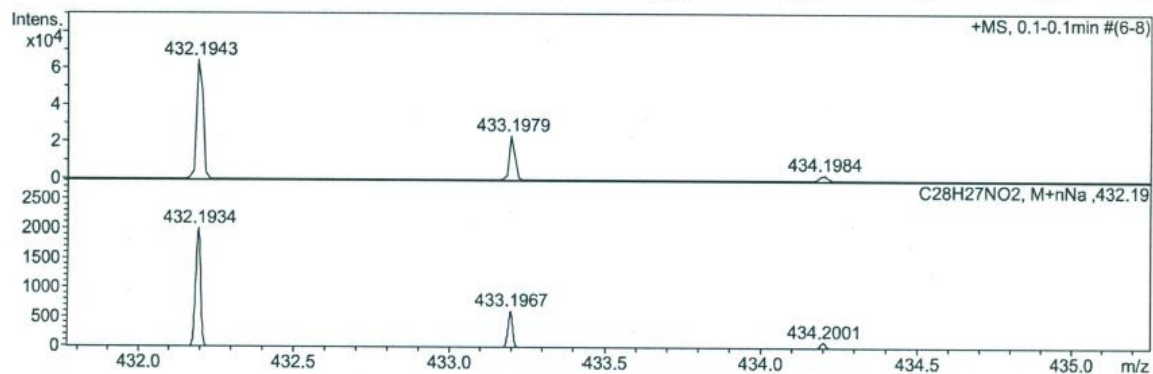Scanned copy of mass spectrum of **5r**

Data File C:\CHEM32\1\DATA\NARESH\2017-02-11AB-KN-04-096-ADH-30-1-254-50M.D  
 Sample Name: AB-KN-04-096-ADH-30-1-254-50M

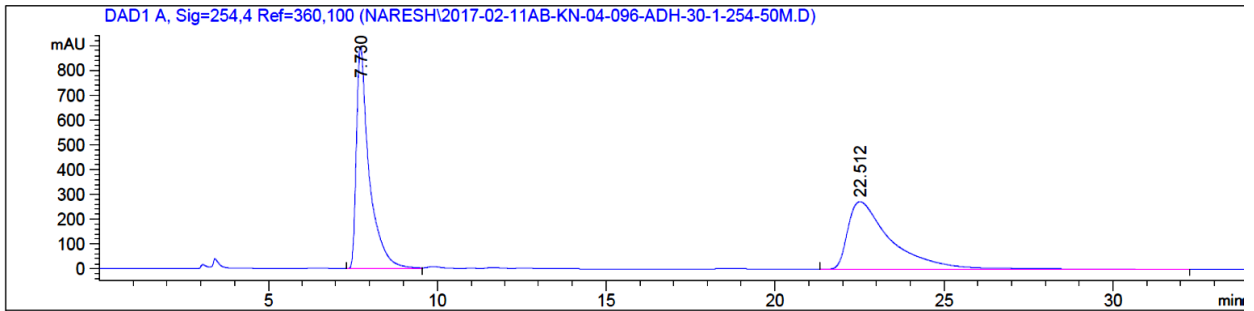

Signal 1: DAD1 A, Sig=254,4 Ref=360,100

| Peak # | RetTime [min] | Type | Width [min] | Area [mAU*s] | Height [mAU] | Area %  |
|--------|---------------|------|-------------|--------------|--------------|---------|
| 1      | 7.730         | BV   | 0.3783      | 2.37294e4    | 898.04633    | 49.5529 |
| 2      | 22.512        | BB   | 1.2775      | 2.41577e4    | 272.71533    | 50.4471 |

Totals : 4.78871e4 1170.76166

### HPLC data of (±)-5r

Data File C:\CHEM32\1\DATA\NARESH\2017-02-11AB-KNB-04-102-R-ADH-30-1-254-50M.D  
 Sample Name: AB-KNB-04-102-R-ADH-30-1-254-50M

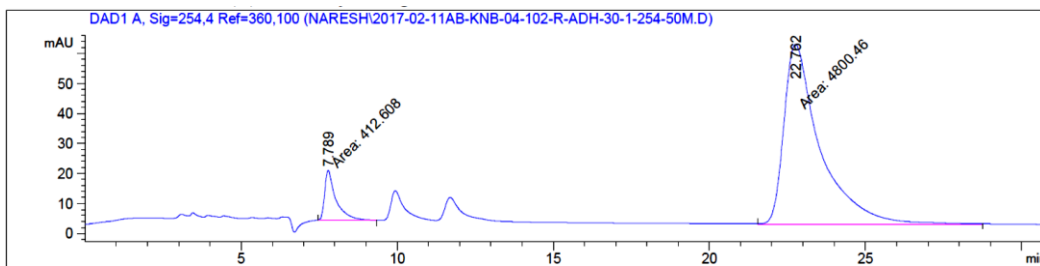

Signal 1: DAD1 A, Sig=254,4 Ref=360,100

| Peak # | RetTime [min] | Type | Width [min] | Area [mAU*s] | Height [mAU] | Area %  |
|--------|---------------|------|-------------|--------------|--------------|---------|
| 1      | 7.789         | MM   | 0.4156      | 412.60794    | 16.54796     | 7.9149  |
| 2      | 22.762        | MM   | 1.3375      | 4800.45703   | 59.81768     | 92.0851 |

Totals : 5213.06497 76.36564

### HPLC data of (+)-5r

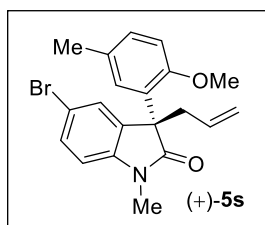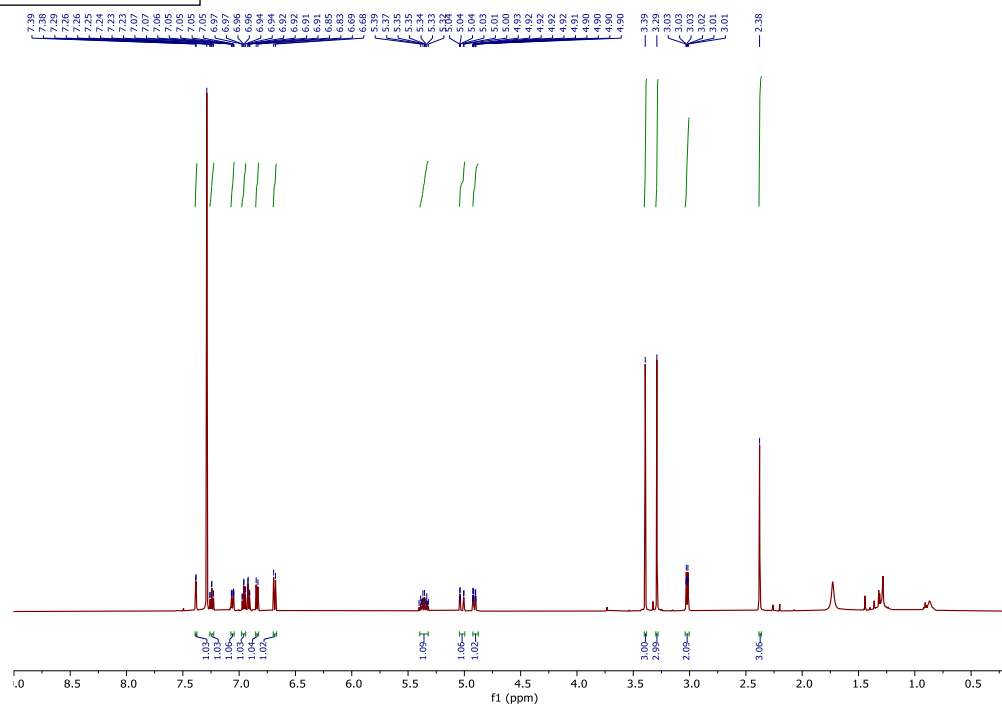

$^1\text{H}$  NMR (500 MHz,  $\text{CDCl}_3$ ) of compound (+)-5s

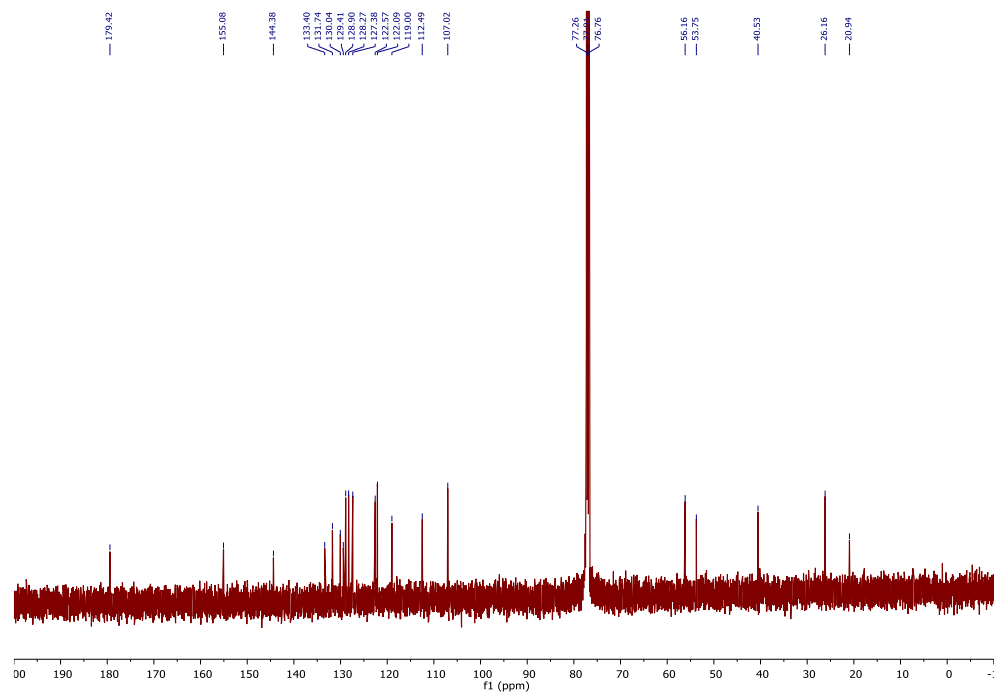

$^{13}\text{C}$  NMR (500 MHz,  $\text{CDCl}_3$ ) of compound (+)-5s

## Display Report

## Analysis Info

Analysis Name D:\Data\NEW USER DATA 2017\2019\JUNE\10 june\Dr A Bisai-AM-03-11\_1-A\_4\_01\_6854.d  
Method hrlcms-20 sept.m  
Sample Name Dr A Bisai-AM-03-11  
Comment

Acquisition Date 6/10/2019 10:33:28 AM

Operator RUCHI

Instrument micrOTOF-Q II 10330

## Acquisition Parameter

|             |          |                       |           |                  |           |
|-------------|----------|-----------------------|-----------|------------------|-----------|
| Source Type | ESI      | Ion Polarity          | Positive  | Set Nebulizer    | 1.2 Bar   |
| Focus       | Active   | Set Capillary         | 4500 V    | Set Dry Heater   | 200 °C    |
| Scan Begin  | 50 m/z   | Set End Plate Offset  | -500 V    | Set Dry Gas      | 7.0 l/min |
| Scan End    | 3000 m/z | Set Collision Cell RF | 130.0 Vpp | Set Divert Valve | Waste     |

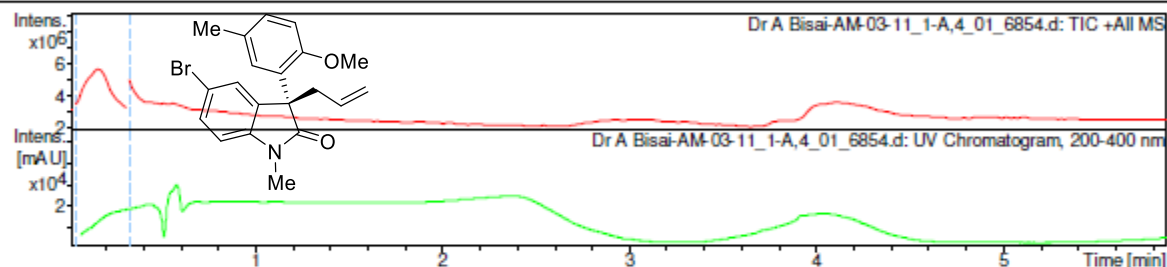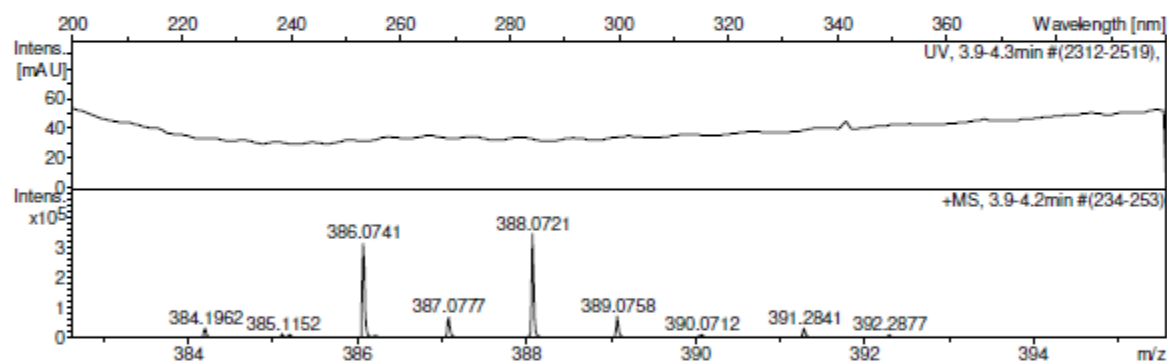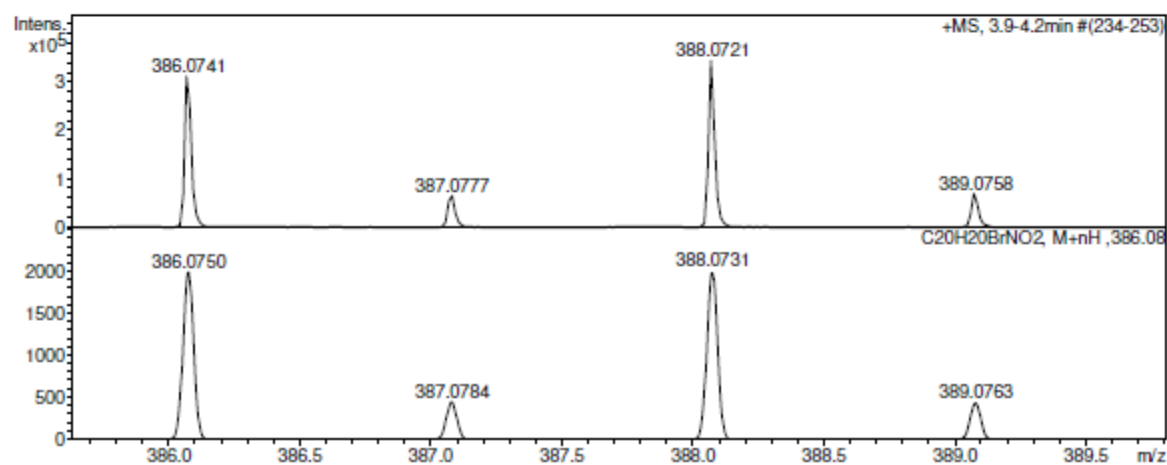

Scanned copy of mass spectrum of 5s

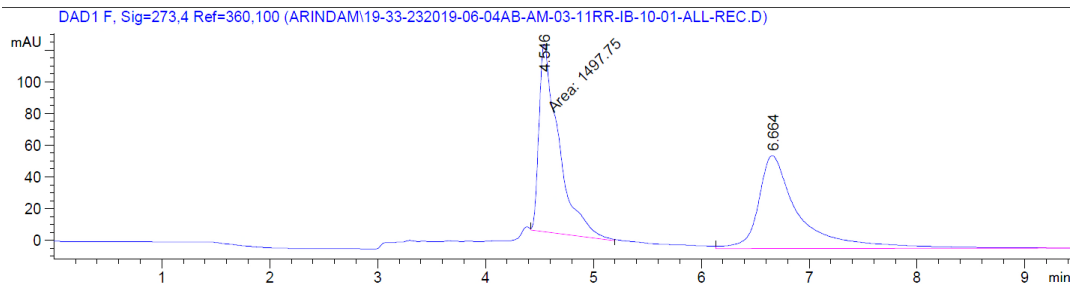

Signal 6: DAD1 F, Sig=273,4 Ref=360,100

| Peak # | RetTime [min] | Type | Width [min] | Area [mAU*s] | Height [mAU] | Area %  |
|--------|---------------|------|-------------|--------------|--------------|---------|
| 1      | 4.546         | MM   | 0.2113      | 1497.75293   | 118.15854    | 49.2627 |
| 2      | 6.664         | VBA  | 0.3791      | 1542.58655   | 58.59653     | 50.7373 |

Totals : 3040.33948 176.75507

#### HPLC Data of (±)-5s

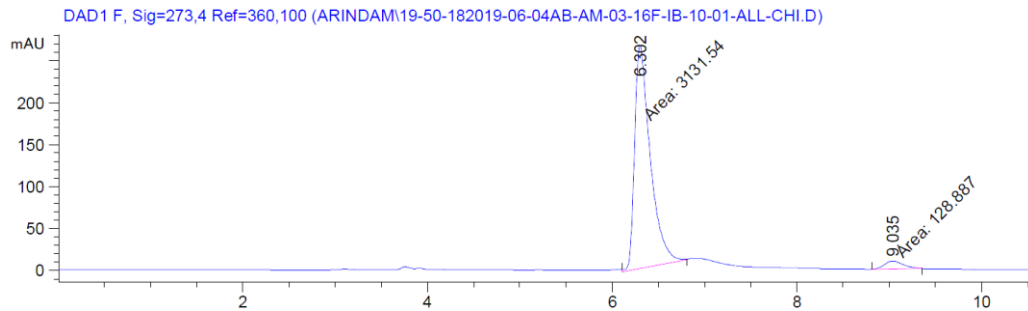

Signal 6: DAD1 F, Sig=273,4 Ref=360,100

| Peak # | RetTime [min] | Type | Width [min] | Area [mAU*s] | Height [mAU] | Area %  |
|--------|---------------|------|-------------|--------------|--------------|---------|
| 1      | 6.302         | MM   | 0.1945      | 3131.54224   | 268.29449    | 96.0469 |
| 2      | 9.035         | MM   | 0.2282      | 128.88745    | 9.41365      | 3.9531  |

Totals : 3260.42969 277.70815

#### HPLC data of (+)-5s

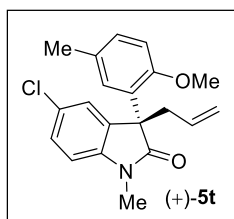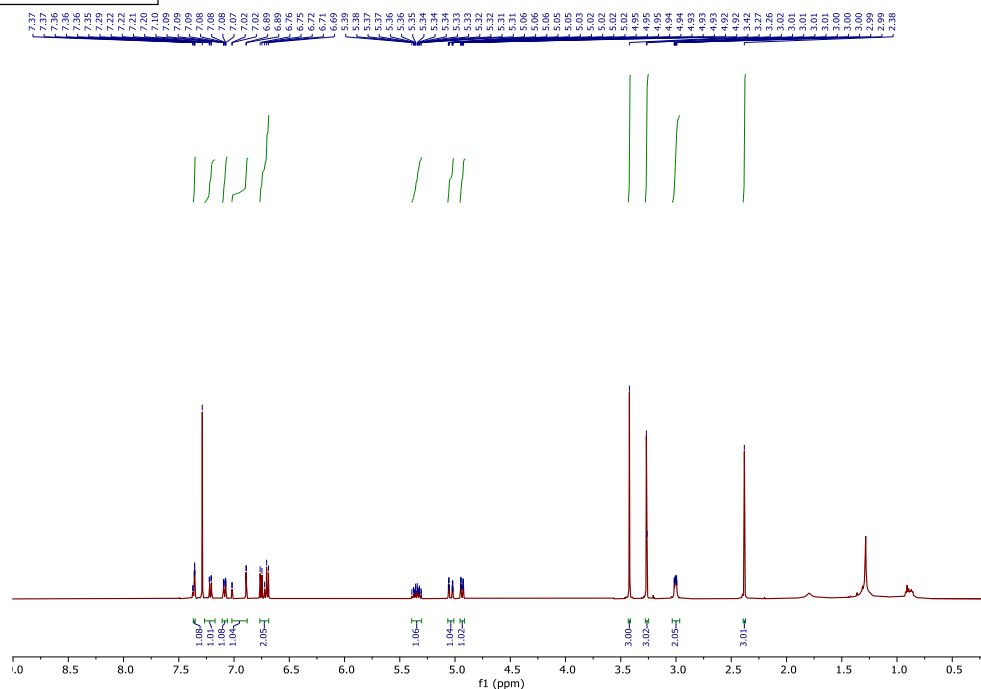



## Display Report

## Analysis Info

Analysis Name D:\Data\NEW USER DATA 2017\2019\JUNE\10 june\Dr A Bisai-AM-03-14\_1-B,3\_01\_6864.d  
Method hrlcms-20 sept.m  
Sample Name Dr A Bisai-AM-03-14  
Comment

Acquisition Date 6/10/2019 11:45:28 AM

Operator RUCHI

Instrument micrOTOF-Q II 10330

## Acquisition Parameter

|             |          |                       |           |                  |           |
|-------------|----------|-----------------------|-----------|------------------|-----------|
| Source Type | ESI      | Ion Polarity          | Positive  | Set Nebulizer    | 1.2 Bar   |
| Focus       | Active   | Set Capillary         | 4500 V    | Set Dry Heater   | 200 °C    |
| Scan Begin  | 50 m/z   | Set End Plate Offset  | -500 V    | Set Dry Gas      | 7.0 l/min |
| Scan End    | 3000 m/z | Set Collision Cell RF | 130.0 Vpp | Set Divert Valve | Waste     |

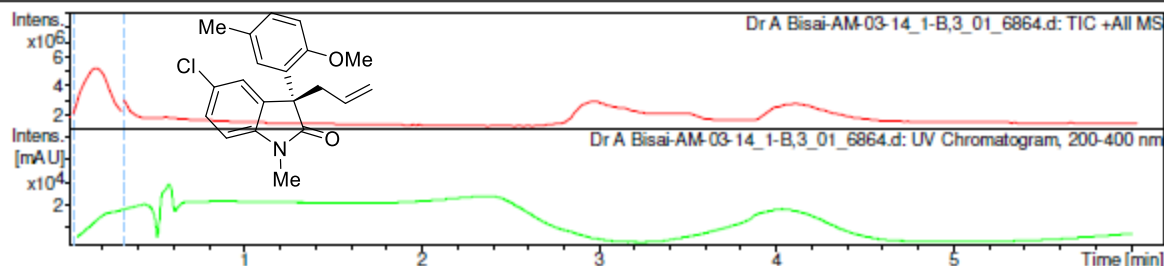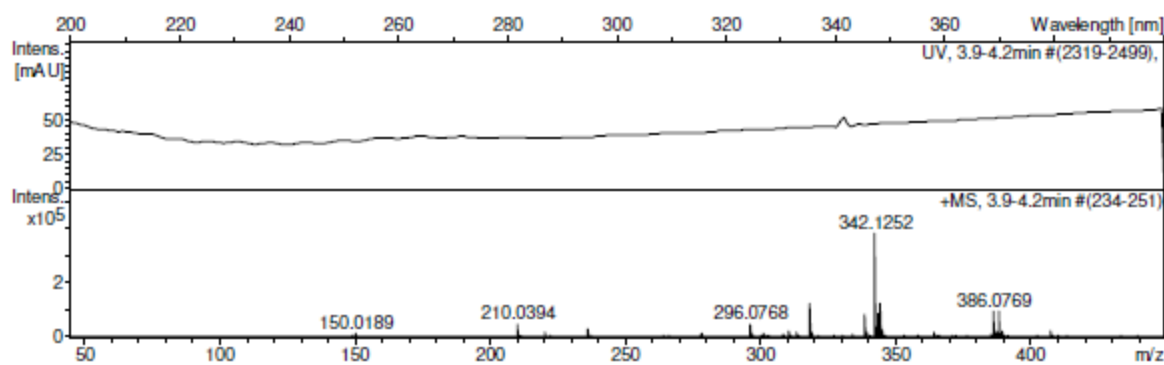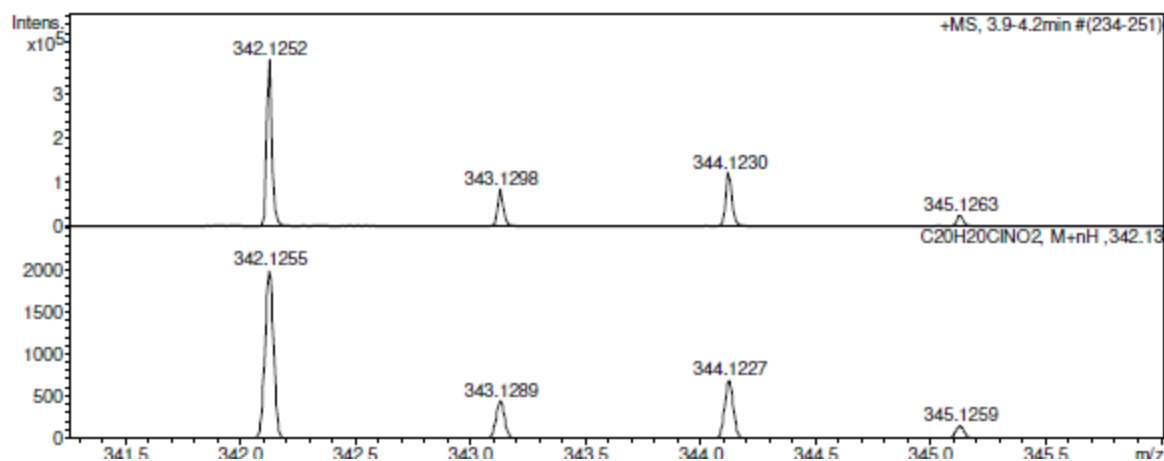

Scanned copy of mass spectrum of 5t

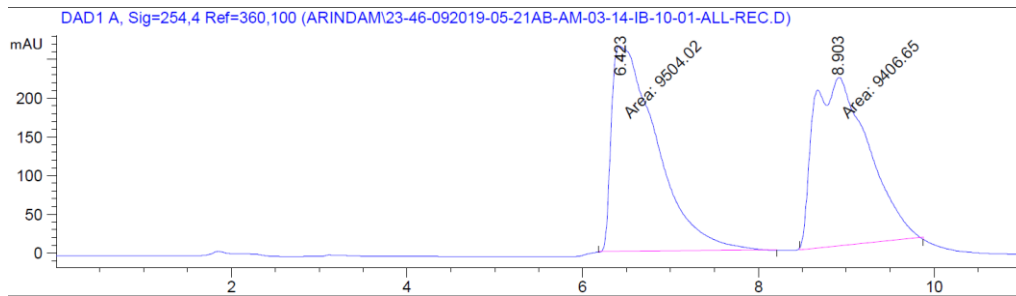

Signal 1: DAD1 A, Sig=254,4 Ref=360,100

| Peak # | RetTime [min] | Type | Width [min] | Area [mAU*s] | Height [mAU] | Area %  |
|--------|---------------|------|-------------|--------------|--------------|---------|
| 1      | 6.423         | MM   | 0.6010      | 9504.02148   | 263.56543    | 50.2575 |
| 2      | 8.903         | MM   | 0.7244      | 9406.64648   | 216.43089    | 49.7425 |

Totals : 1.89107e4 479.99632

#### HPLC Data of (±)-5t

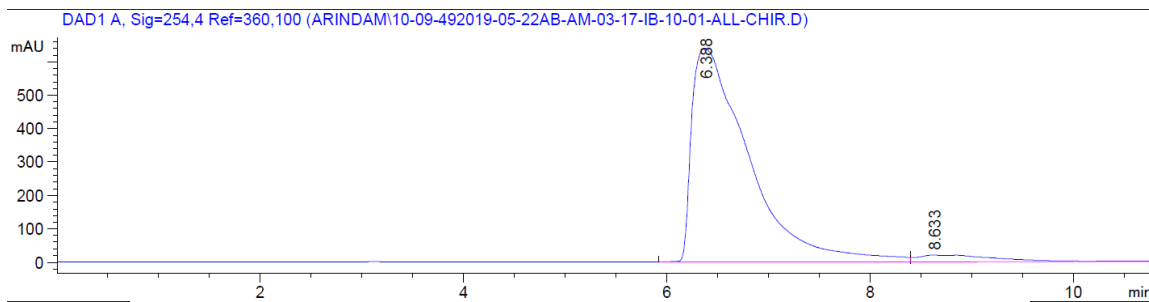

Signal 1: DAD1 A, Sig=254,4 Ref=360,100

| Peak # | RetTime [min] | Type | Width [min] | Area [mAU*s] | Height [mAU] | Area %  |
|--------|---------------|------|-------------|--------------|--------------|---------|
| 1      | 6.388         | BV   | 0.5343      | 2.49075e4    | 639.62952    | 95.8482 |
| 2      | 8.633         | VBA  | 0.6649      | 1078.90356   | 20.40334     | 4.1518  |

Totals : 2.59864e4 660.03285

#### HPLC data of (+)-5t



## Display Report

## Analysis Info

Analysis Name D:\Data\NEW USER DATA 2017\2019\JUNE\10 june\Dr A Bisai-AM-03-18\_1-A,6\_01\_6857.d  
Method hrlcms-20 sept.m  
Sample Name Dr A Bisai-AM-03-18  
Comment

Acquisition Date 6/10/2019 10:55:03 AM

Operator RUCHI

Instrument micrOTOF-Q II 10330

## Acquisition Parameter

|             |          |                       |           |                  |           |
|-------------|----------|-----------------------|-----------|------------------|-----------|
| Source Type | ESI      | Ion Polarity          | Positive  | Set Nebulizer    | 1.2 Bar   |
| Focus       | Active   | Set Capillary         | 4500 V    | Set Dry Heater   | 200 °C    |
| Scan Begin  | 50 m/z   | Set End Plate Offset  | -500 V    | Set Dry Gas      | 7.0 l/min |
| Scan End    | 3000 m/z | Set Collision Cell RF | 130.0 Vpp | Set Divert Valve | Waste     |

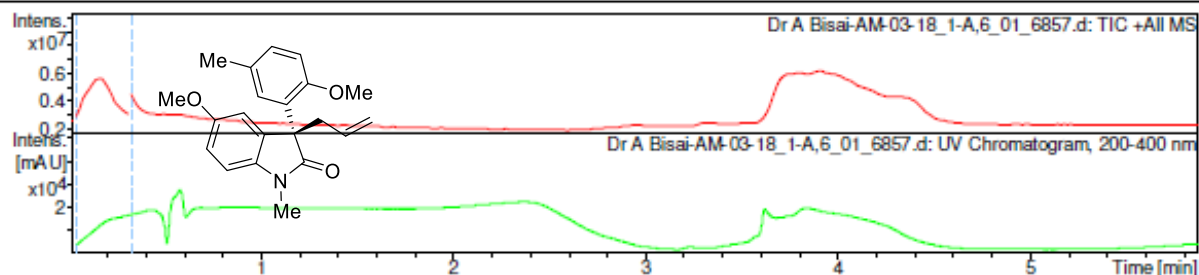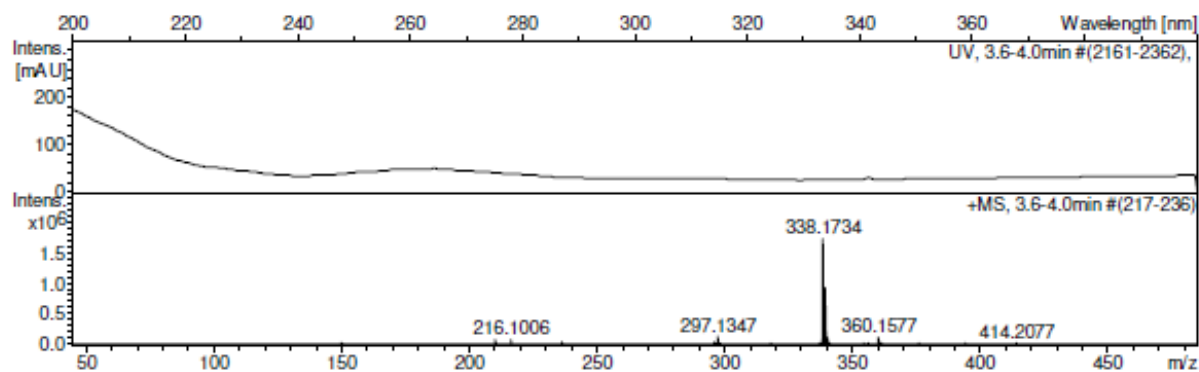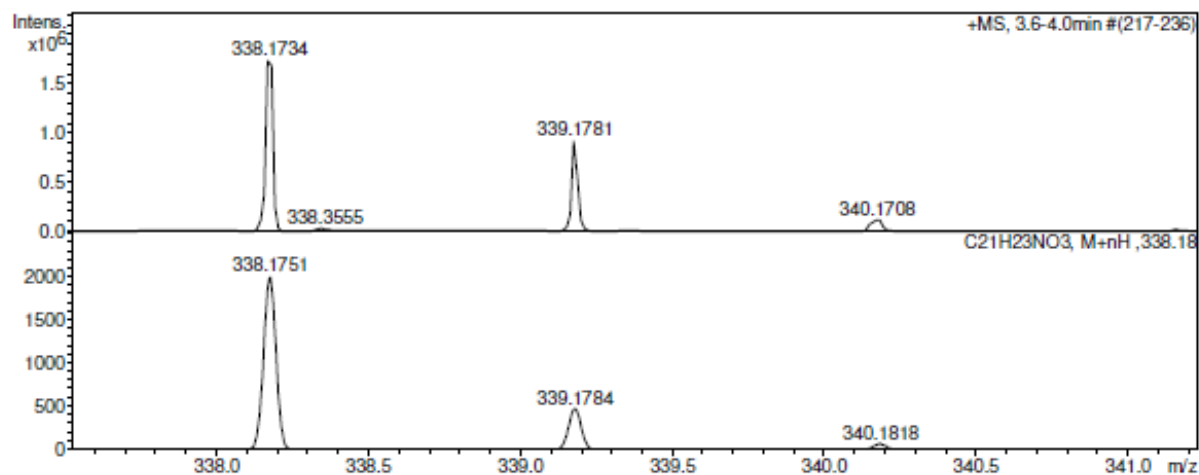Scanned Mass data of compound **5u**

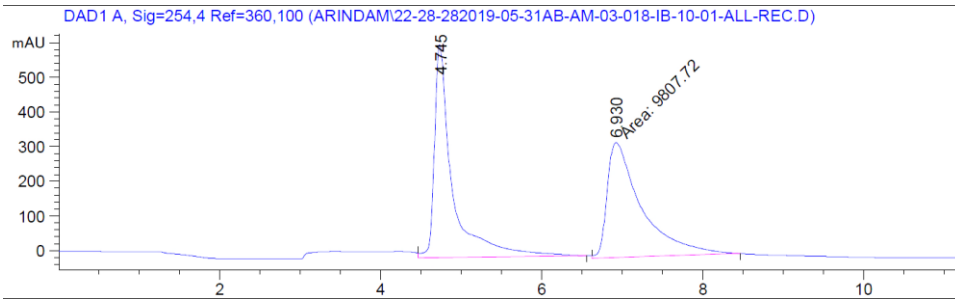

Signal 1: DAD1 A, Sig=254,4 Ref=360,100

| Peak # | RetTime [min] | Type | Width [min] | Area [mAU*s] | Height [mAU] | Area %  |
|--------|---------------|------|-------------|--------------|--------------|---------|
| 1      | 4.745         | VB   | 0.2331      | 9571.66699   | 603.41498    | 49.3910 |
| 2      | 6.930         | MM   | 0.4931      | 9807.71582   | 331.48758    | 50.6090 |

Totals : 1.93794e4 934.90256

#### HPLC data of (±)-5u

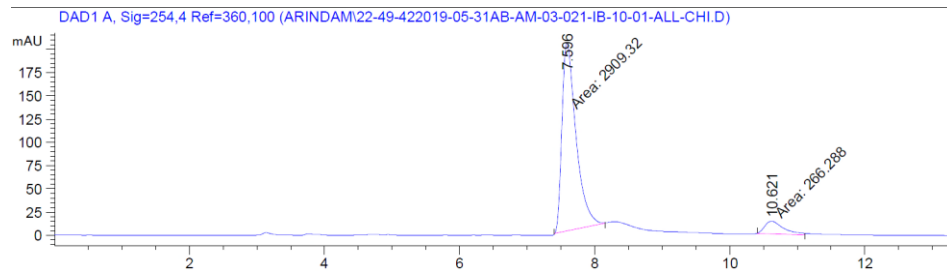

Signal 1: DAD1 A, Sig=254,4 Ref=360,100

| Peak # | RetTime [min] | Type | Width [min] | Area [mAU*s] | Height [mAU] | Area %  |
|--------|---------------|------|-------------|--------------|--------------|---------|
| 1      | 7.596         | MM   | 0.2412      | 2909.32031   | 201.05243    | 91.6146 |
| 2      | 10.621        | MM   | 0.3228      | 266.28760    | 13.74798     | 8.3854  |

Totals : 3175.60791 214.80041

#### HPLC Data of (+)-5u

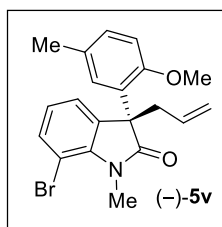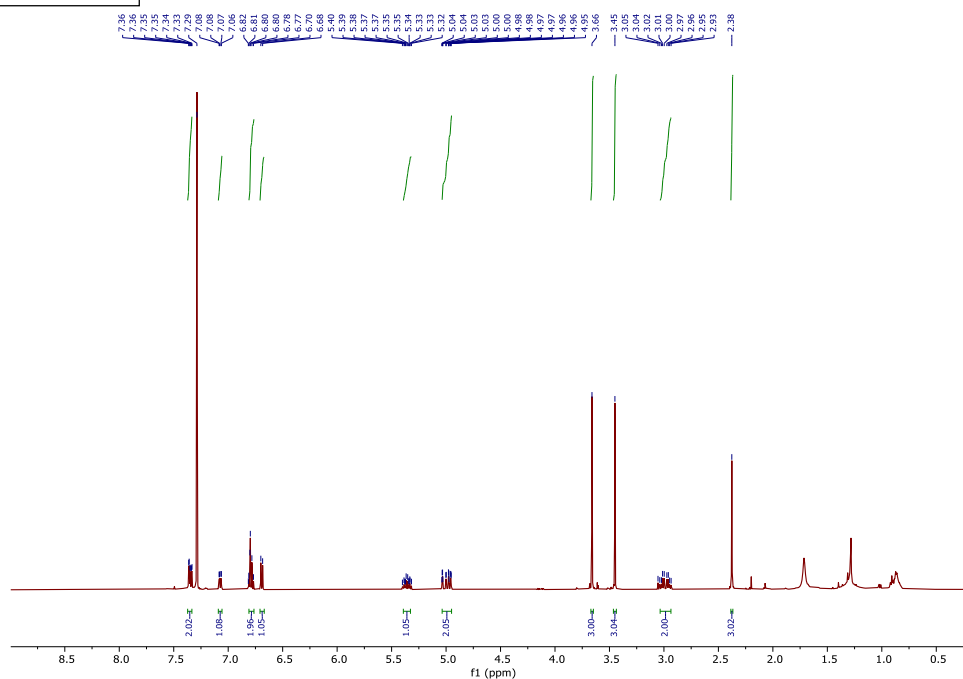

$^1\text{H}$  NMR (500 MHz,  $\text{CDCl}_3$ ) of compound (-)-5v

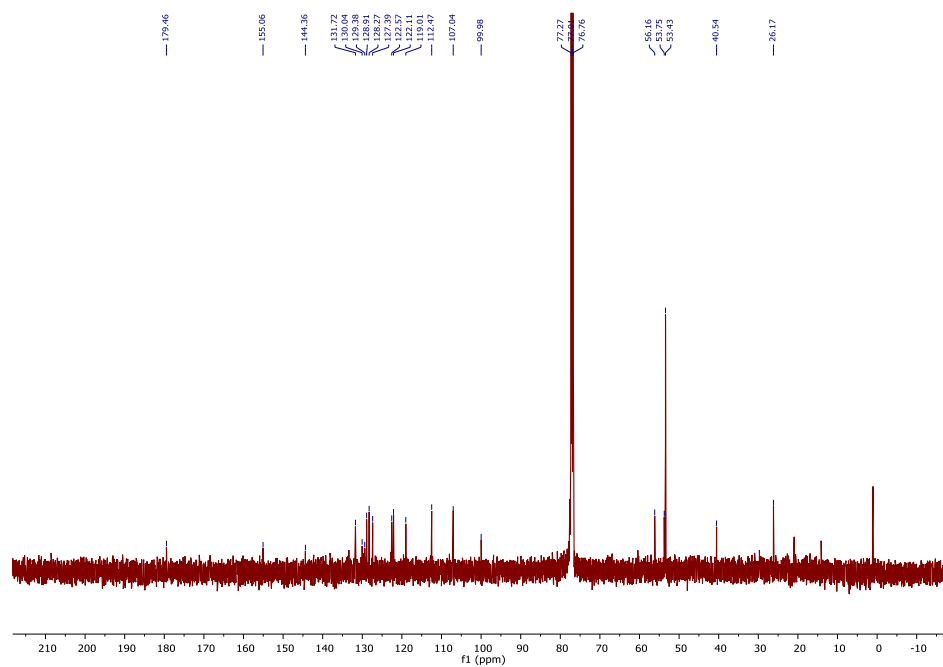

$^{13}\text{C}$  NMR (500 MHz,  $\text{CDCl}_3$ ) of compound (-)-5v

## Display Report

## Analysis Info

Analysis Name D:\Data\NEW USER DATA 2017\2019\JUNE\10 june\Dr A Bisai-AM-03-25\_1-B,1\_01\_6861.d  
 Method hrlcms-20 sept.m  
 Sample Name Dr A Bisai-AM-03-25  
 Comment

Acquisition Date 6/10/2019 11:23:53 AM

Operator RUCHI

Instrument micrOTOF-Q II 10330

## Acquisition Parameter

|             |          |                       |           |                  |           |
|-------------|----------|-----------------------|-----------|------------------|-----------|
| Source Type | ESI      | Ion Polarity          | Positive  | Set Nebulizer    | 1.2 Bar   |
| Focus       | Active   | Set Capillary         | 4500 V    | Set Dry Heater   | 200 °C    |
| Scan Begin  | 50 m/z   | Set End Plate Offset  | -500 V    | Set Dry Gas      | 7.0 l/min |
| Scan End    | 3000 m/z | Set Collision Cell RF | 130.0 Vpp | Set Divert Valve | Waste     |

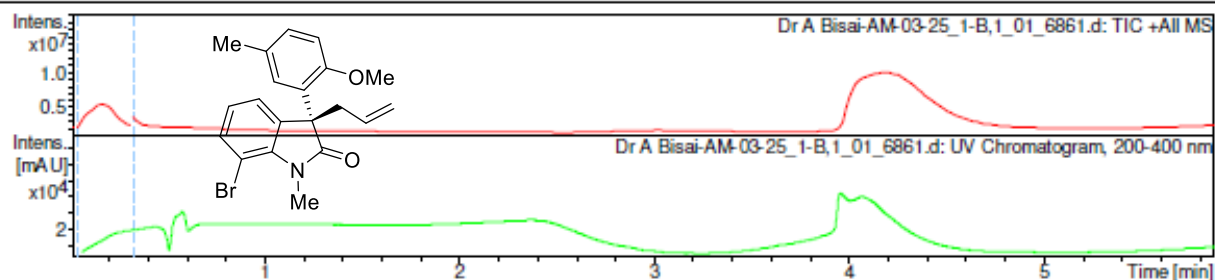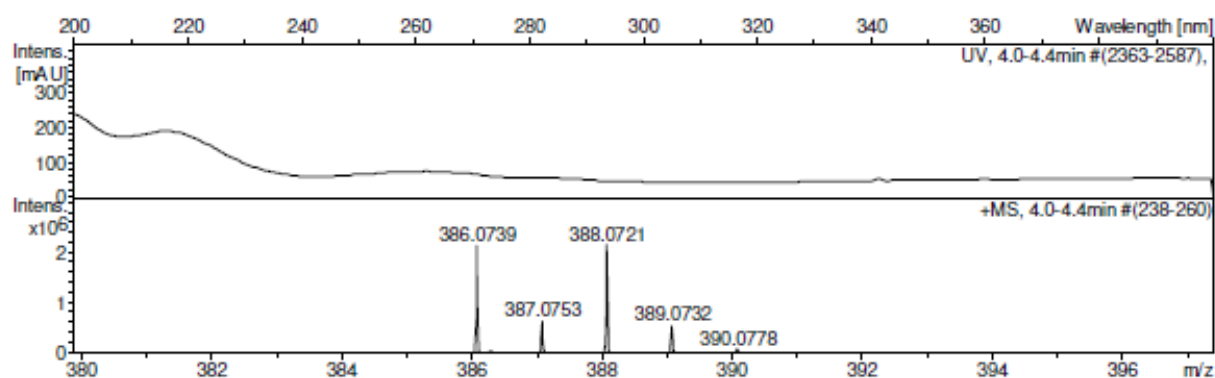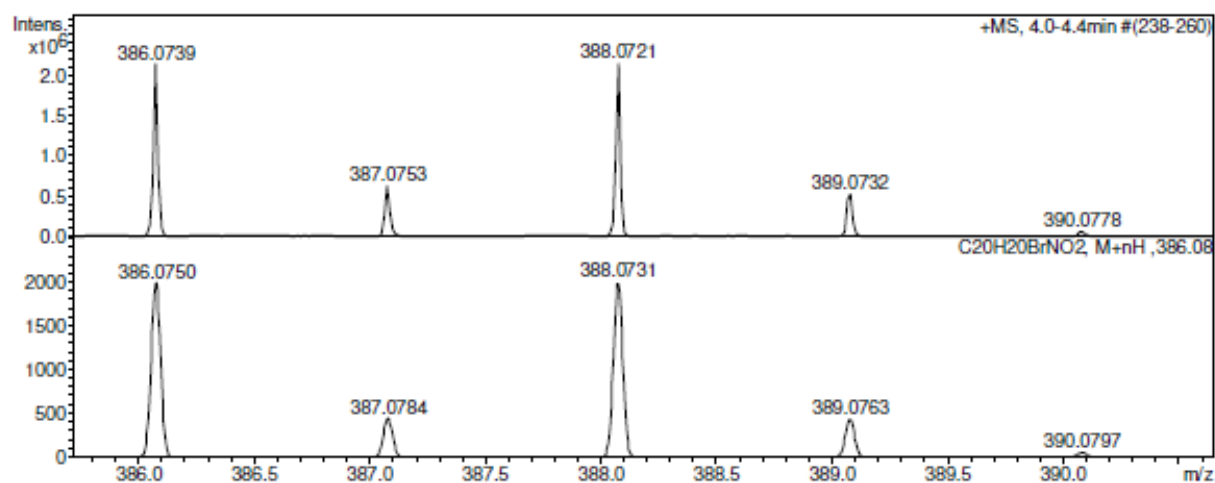

Scanned Mass data of compound 5v

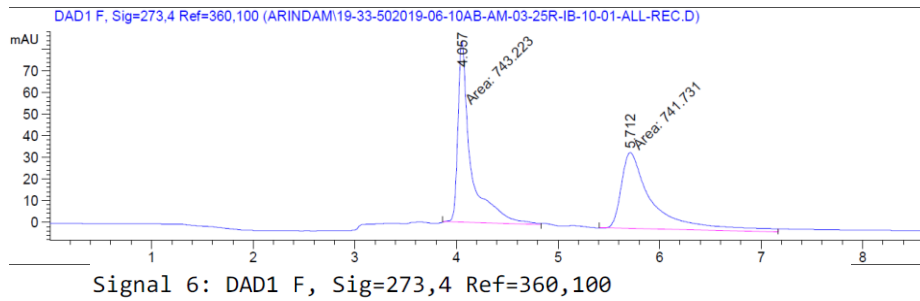

| Peak # | RetTime [min] | Type | Width [min] | Area [mAU*s] | Height [mAU] | Area %  |
|--------|---------------|------|-------------|--------------|--------------|---------|
| 1      | 4.057         | MM   | 0.1471      | 743.22339    | 84.22432     | 50.0503 |
| 2      | 5.712         | MM   | 0.3525      | 741.73071    | 35.06516     | 49.9497 |

Totals : 1484.95410 119.28948

### HPLC Data of (±)-5v

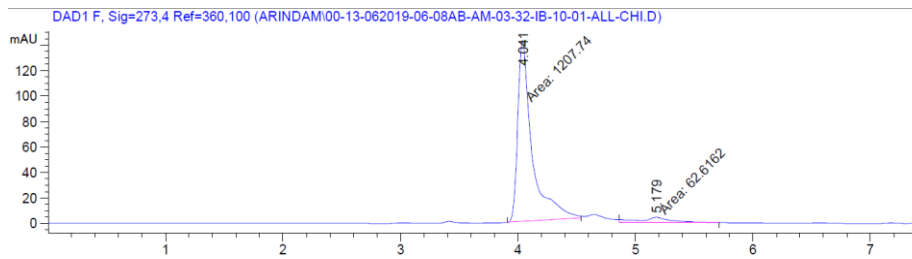

Signal 6: DAD1 F, Sig=273,4 Ref=360,100

| Peak # | RetTime [min] | Type | Width [min] | Area [mAU*s] | Height [mAU] | Area %  |
|--------|---------------|------|-------------|--------------|--------------|---------|
| 1      | 4.041         | MM   | 0.1409      | 1207.73901   | 142.87244    | 95.0710 |
| 2      | 5.179         | MM   | 0.2744      | 62.61616     | 3.80319      | 4.9290  |

Totals : 1270.35518 146.67562

### HPLC data of (-)-5v



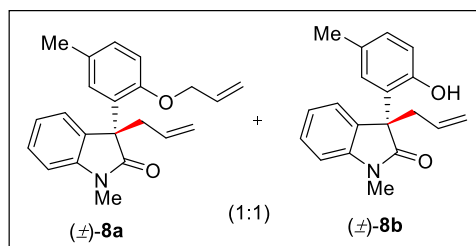

Data File C:\CHEM32\1\DATA\NARESH\2017-02-25AB-KNB-04-130-ID-3-20-1-254-50M.D  
 Sample Name: AB-KNB-04-130-ID-3-20-1-254-50M

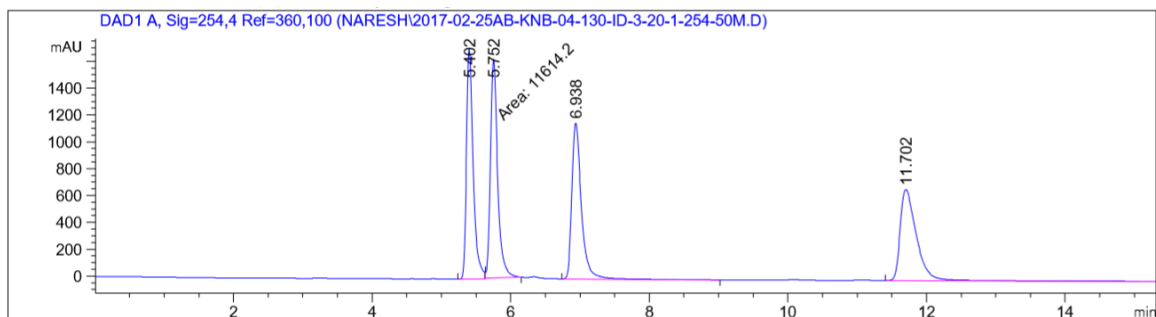

Signal 1: DAD1 A, Sig=254,4 Ref=360,100

| Peak # | RetTime [min] | Type | Width [min] | Area [mAU*s] | Height [mAU] | Area %  |
|--------|---------------|------|-------------|--------------|--------------|---------|
| 1      | 5.402         | BV   | 0.1023      | 1.14922e4    | 1712.02576   | 25.3740 |
| 2      | 5.752         | MM   | 0.1190      | 1.16142e4    | 1626.31165   | 25.6435 |
| 3      | 6.938         | BB   | 0.1435      | 1.10967e4    | 1161.01721   | 24.5010 |
| 4      | 11.702        | BBA  | 0.2466      | 1.10879e4    | 678.86127    | 24.4815 |

Totals : 4.52911e4 5178.21588

=====  
 \*\*\* End of Report \*\*\*

HPLC data of (+)-**8a** and (+)-**8b**

(dr = 1:1)

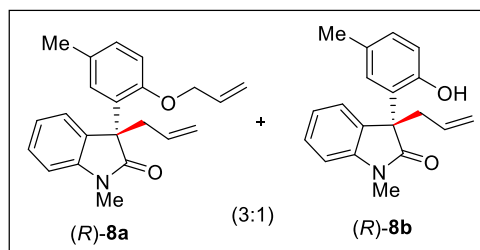

Data File C:\CHEM32\1\DATA\NARESH\2017-02-25AB-KNB-04-129-ID-3-20-1-254-50M.D  
 Sample Name: AB-KNB-04-129-ID-3-20-1-254-50M

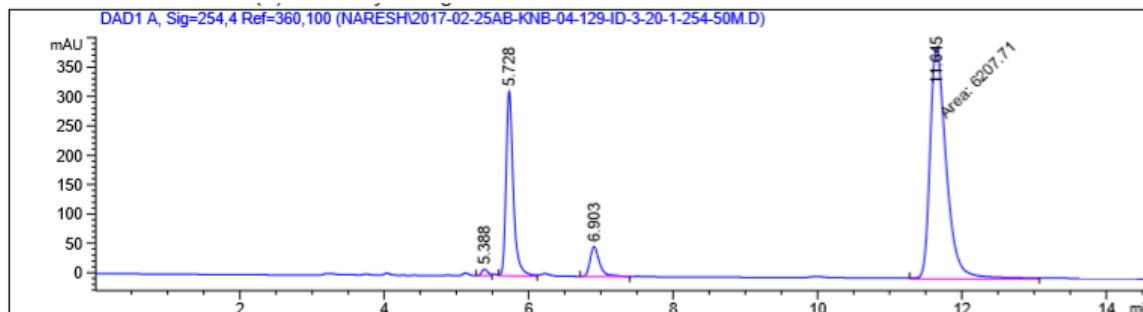

Signal 1: DAD1 A, Sig=254,4 Ref=360,100

| Peak # | RetTime [min] | Type | Width [min] | Area [mAU*s] | Height [mAU] | Area %  |
|--------|---------------|------|-------------|--------------|--------------|---------|
| 1      | 5.388         | BV   | 0.0923      | 68.13051     | 11.31443     | 0.7650  |
| 2      | 5.728         | VV   | 0.1046      | 2171.73901   | 314.52011    | 24.3856 |
| 3      | 6.903         | BB   | 0.1356      | 458.25934    | 50.64569     | 5.1456  |
| 4      | 11.645        | NM   | 0.2630      | 6207.70898   | 393.42474    | 69.7038 |

Totals : 8905.83784 769.90497

=====  
 \*\*\* End of Report \*\*\*

HPLC data of (+)-8a and (+)-8b  
 (dr = 3:1)

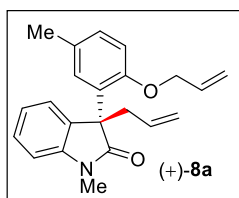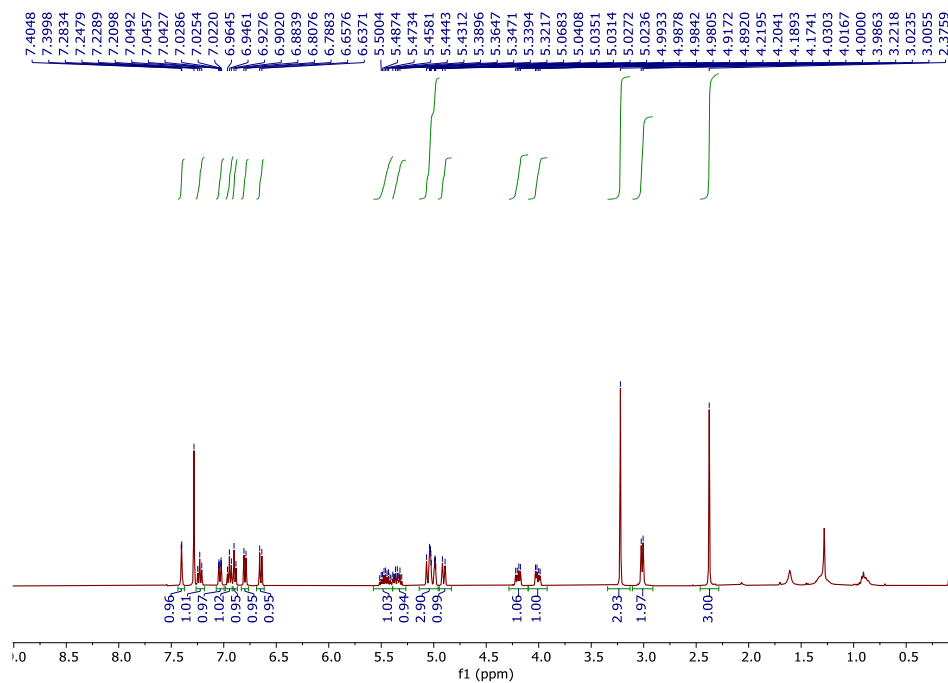

$^1\text{H}$  NMR (400 MHz,  $\text{CDCl}_3$ ) of compound (+)-**8a**

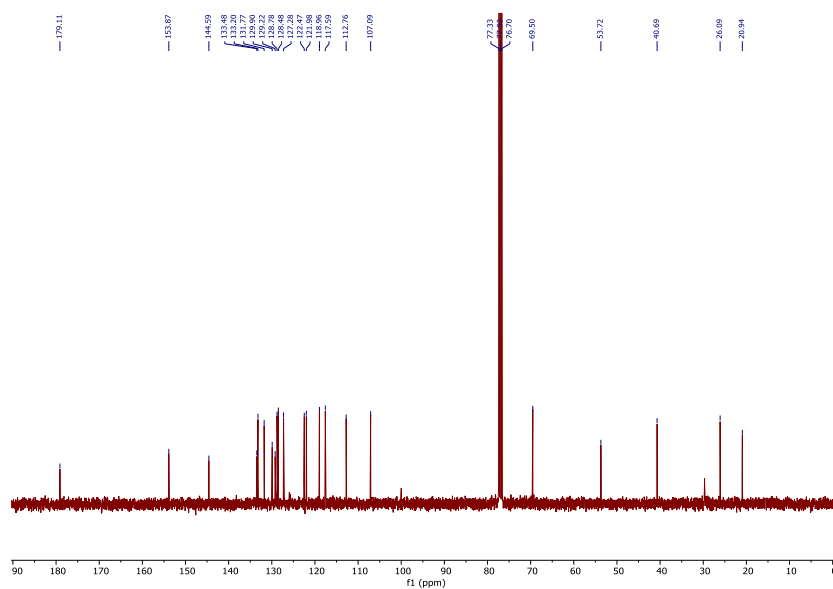

$^{13}\text{C}$  NMR (100 MHz,  $\text{CDCl}_3$ ) of compound (+)-**8a**

## Display Report

## Analysis Info

Analysis Name D:\Data\user data\2017\JUNE 2017\16 june\Dr.A.Bisai-AB-RSM-00-137PS-1.d  
Method Pos\_Mid\_tunemix.m  
Sample Name AB-RSM-00-137PS-1  
Comment

Acquisition Date 6/16/2017 4:17:41 PM  
Operator RUCHI SHRIVASTAVA  
Instrument micrOTOF-Q II 10330

## Acquisition Parameter

|             |          |                       |           |                  |           |
|-------------|----------|-----------------------|-----------|------------------|-----------|
| Source Type | ESI      | Ion Polarity          | Positive  | Set Nebulizer    | 0.3 Bar   |
| Focus       | Active   | Set Capillary         | 4500 V    | Set Dry Heater   | 200 °C    |
| Scan Begin  | 50 m/z   | Set End Plate Offset  | -500 V    | Set Dry Gas      | 4.0 l/min |
| Scan End    | 3000 m/z | Set Collision Cell RF | 450.0 Vpp | Set Divert Valve | Waste     |

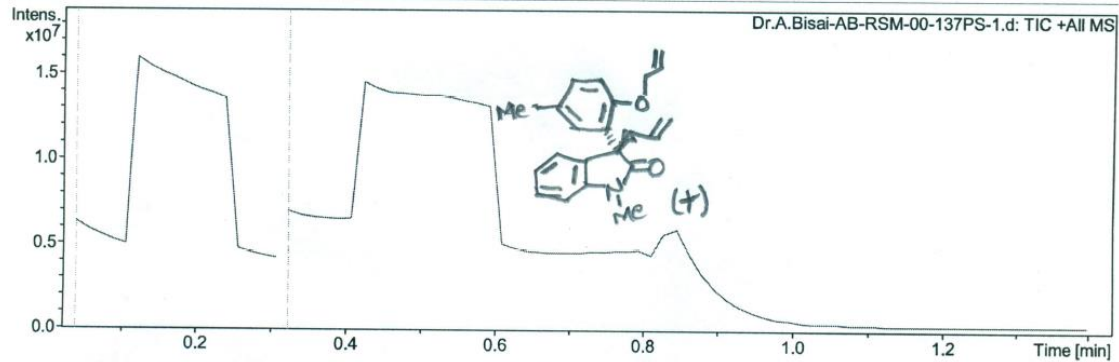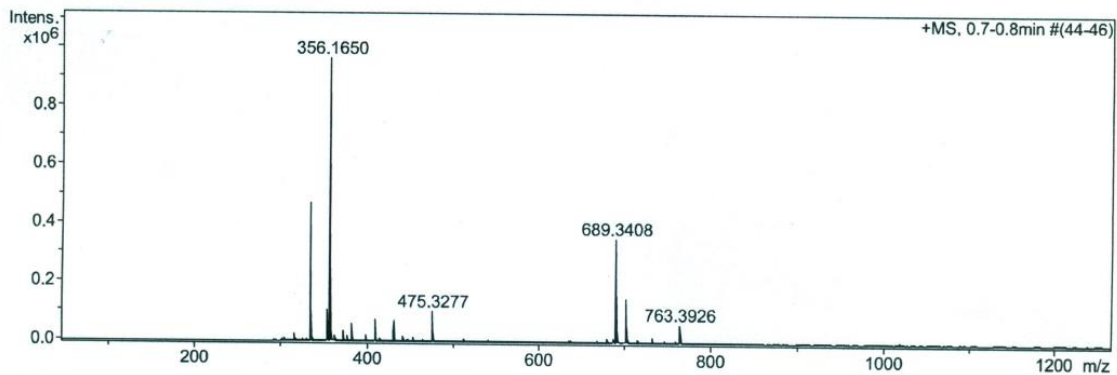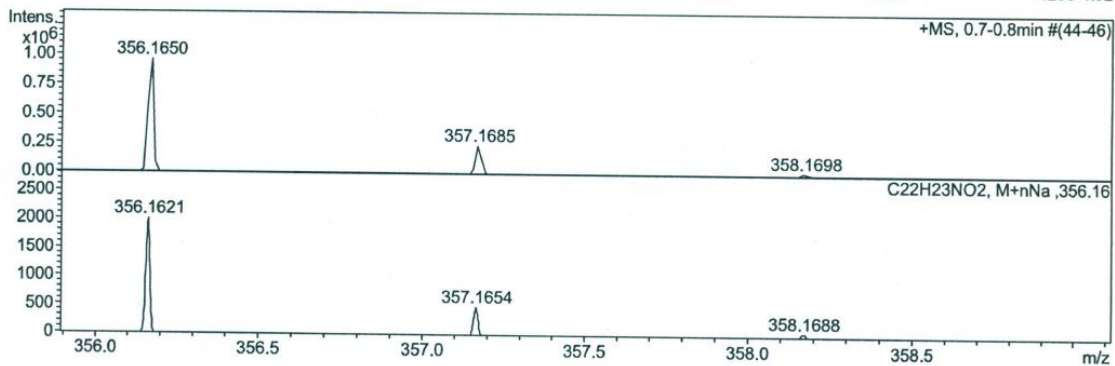Scanned copy of mass spectrum of **8a**

Data File C:\CHEM32\1\DATA\NARESH\2017-02-28AB-KNB-04-137-PS-R2-ID-3-30-1-254-50M.D  
 Sample Name: AB-KNB-04-137-PS-R2-ID-3-30-1-254-50M

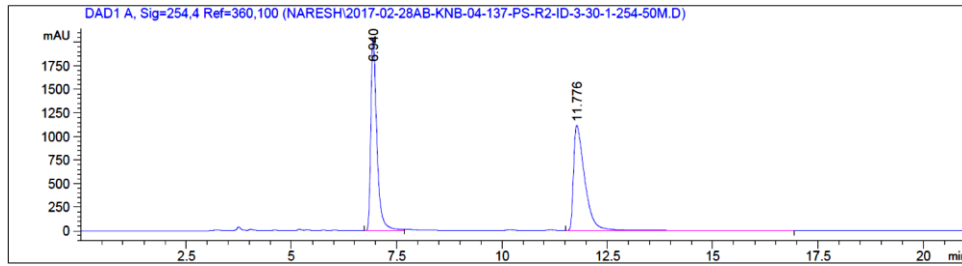

Signal 1: DAD1 A, Sig=254,4 Ref=360,100

| Peak # | RetTime [min] | Type | Width [min] | Area [mAU*s] | Height [mAU] | Area %  |
|--------|---------------|------|-------------|--------------|--------------|---------|
| 1      | 6.940         | BV   | 0.1508      | 2.04694e4    | 2044.10193   | 49.5962 |
| 2      | 11.776        | BB   | 0.2779      | 2.08027e4    | 1113.83081   | 50.4038 |

Totals : 4.12721e4 3157.93274

=====  
 \*\*\* End of Report \*\*\*

### HPLC data of (±)-8a

Data File C:\CHEM32\1\DATA\NARESH\2017-03-1821-32-07AB-KNB-04-157-PS-ID-3-3-30-1-254-50M.D  
 Sample Name: AB-KNB-04-157-PS-ID-3-3-30-1-254-50M

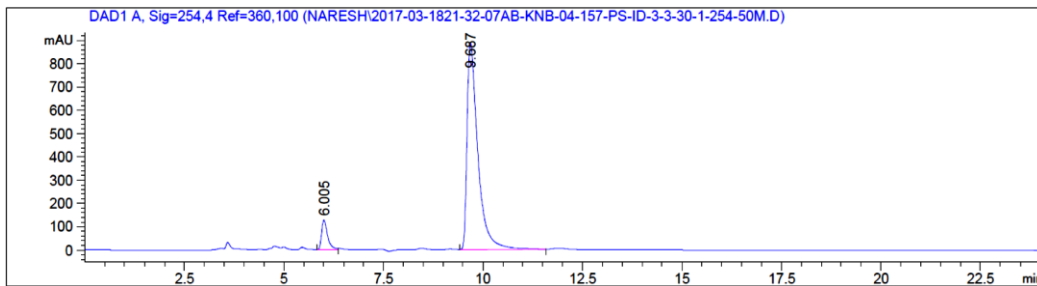

Signal 1: DAD1 A, Sig=254,4 Ref=360,100

| Peak # | RetTime [min] | Type | Width [min] | Area [mAU*s] | Height [mAU] | Area %  |
|--------|---------------|------|-------------|--------------|--------------|---------|
| 1      | 6.005         | BV   | 0.1591      | 1346.84875   | 127.64511    | 7.4610  |
| 2      | 9.687         | VB   | 0.2774      | 1.67050e4    | 888.16193    | 92.5390 |

Totals : 1.80518e4 1015.80704

=====  
 \*\*\* End of Report \*\*\*

### HPLC data of (+)-8a

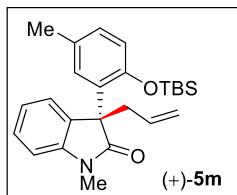

Data File C:\CHEM32\...TA\NARESH\2017-06-1518-01-12AB-KNB-04-134-2-NPS-IC-3-05-1-254-60M.D  
 Sample Name: AB-KNB-04-134-2-NPS-IC-3-05-1-254-60M

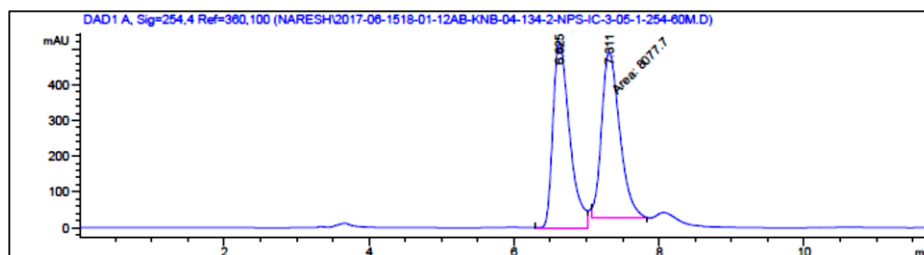

Signal 1: DAD1 A, Sig=254,4 Ref=360,100

| Peak # | RetTime [min] | Type | Width [min] | Area [mAU*s] | Height [mAU] | Area %  |
|--------|---------------|------|-------------|--------------|--------------|---------|
| 1      | 6.625         | BV   | 0.2446      | 8311.57715   | 519.60382    | 50.7135 |
| 2      | 7.311         | MM   | 0.2898      | 8077.69971   | 464.60922    | 49.2865 |

Totals : 1.63893e4 984.21304

\*\*\* End of Report \*\*\*

### HPLC data of (±)-5m

Data File C:\CHEM32\...TA\NARESH\2017-06-1519-03-15AB-KNB-04-157-R-NPS-IC-3-05-1-254-60M.D  
 Sample Name: AB-KNB-04-157-R-NPS-IC-3-05-1-254-60M

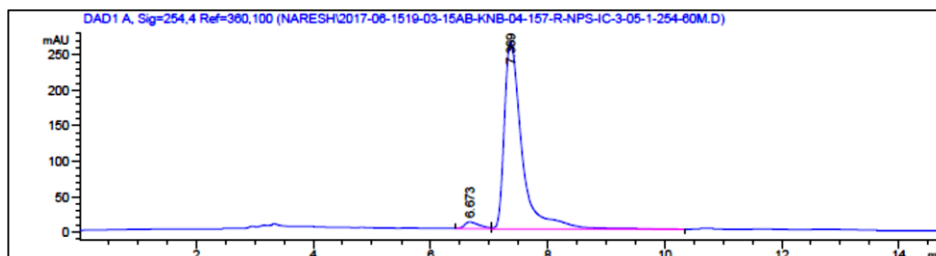

Signal 1: DAD1 A, Sig=254,4 Ref=360,100

| Peak # | RetTime [min] | Type | Width [min] | Area [mAU*s] | Height [mAU] | Area %  |
|--------|---------------|------|-------------|--------------|--------------|---------|
| 1      | 6.673         | BV   | 0.2768      | 165.21983    | 9.23370      | 2.9355  |
| 2      | 7.369         | VB   | 0.3140      | 5463.05273   | 263.37537    | 97.0645 |

Totals : 5628.27257 272.60907

\*\*\* End of Report \*\*\*

HPLC data of (R)-5m from TBS protection of decarboxylative O-protonation compound.

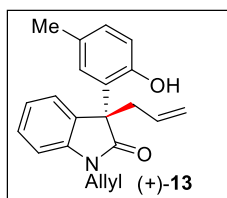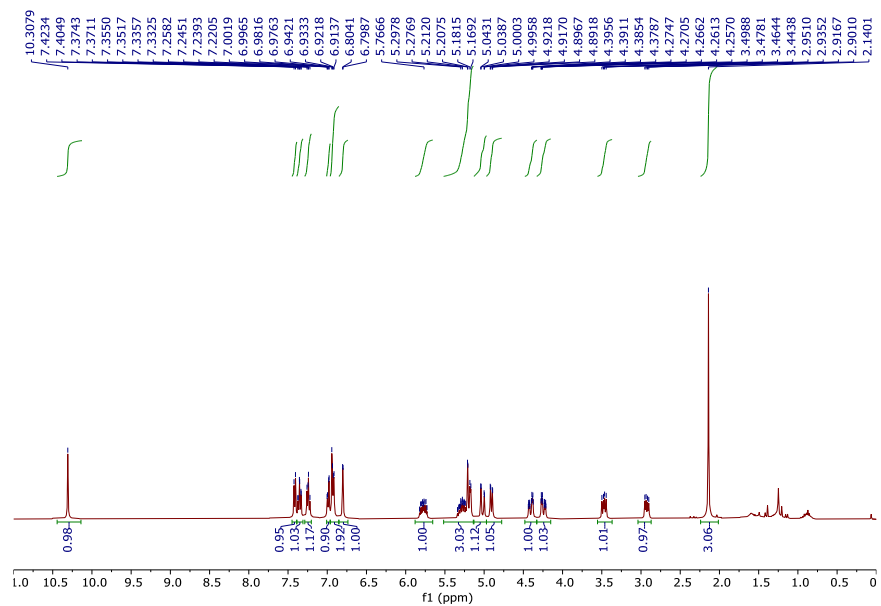 $^1\text{H}$  NMR (400 MHz,  $\text{CDCl}_3$ ) of compound (+)-13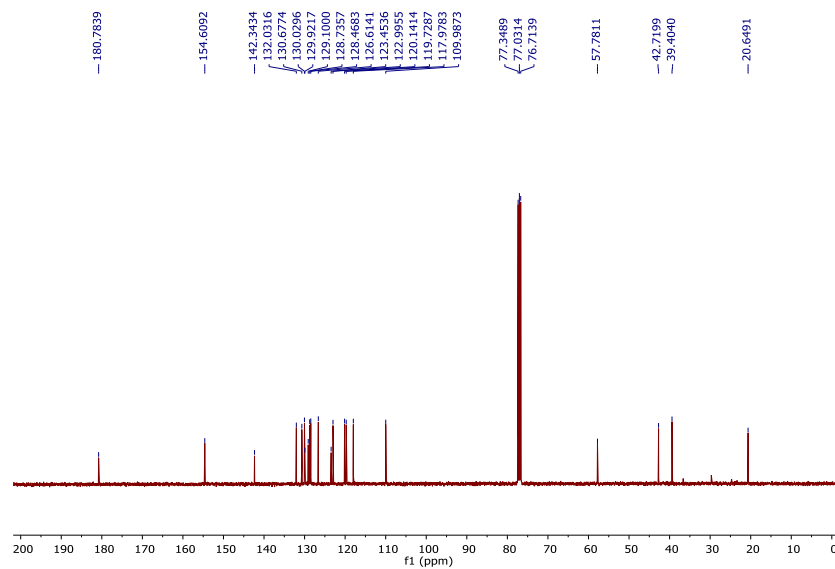 $^{13}\text{C}$  NMR (100 MHz,  $\text{CDCl}_3$ ) of compound (+)-13

## Display Report

|                      |                                                                     |                  |                      |
|----------------------|---------------------------------------------------------------------|------------------|----------------------|
| <b>Analysis Info</b> |                                                                     | Acquisition Date | 6/16/2017 4:21:25 PM |
| Analysis Name        | D:\Data\user data\2017\JUNE 2017\16 june\Dr.A.Bisai-AB-RSM-00-167.d | Operator         | RUCHI SHRIVASTAVA    |
| Method               | Pos_Mid_tunemix.m                                                   | Instrument       | micrOTOF-Q II 10330  |
| Sample Name          | AB-RSM-00-167                                                       |                  |                      |
| Comment              |                                                                     |                  |                      |

**Acquisition Parameter**

|             |          |                       |           |                  |           |
|-------------|----------|-----------------------|-----------|------------------|-----------|
| Source Type | ESI      | Ion Polarity          | Positive  | Set Nebulizer    | 0.3 Bar   |
| Focus       | Active   | Set Capillary         | 4500 V    | Set Dry Heater   | 200 °C    |
| Scan Begin  | 50 m/z   | Set End Plate Offset  | -500 V    | Set Dry Gas      | 4.0 l/min |
| Scan End    | 3000 m/z | Set Collision Cell RF | 450.0 Vpp | Set Divert Valve | Waste     |

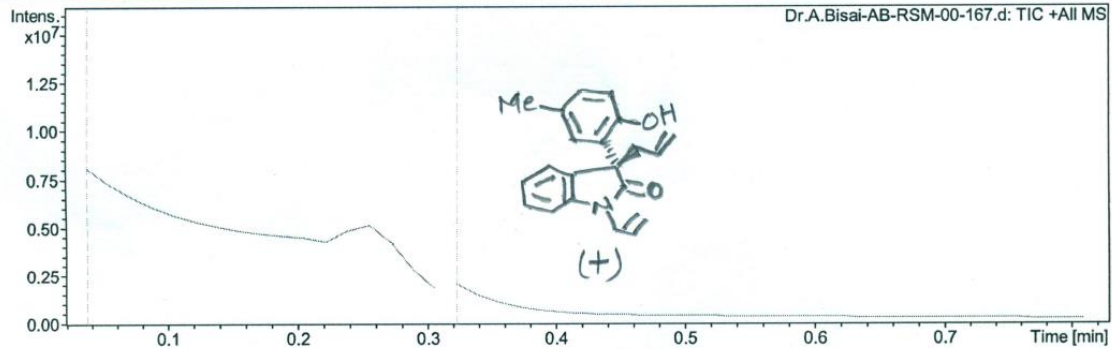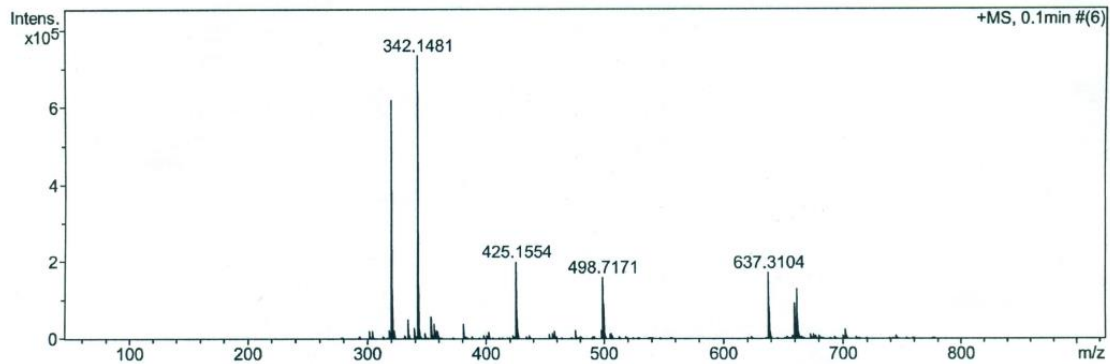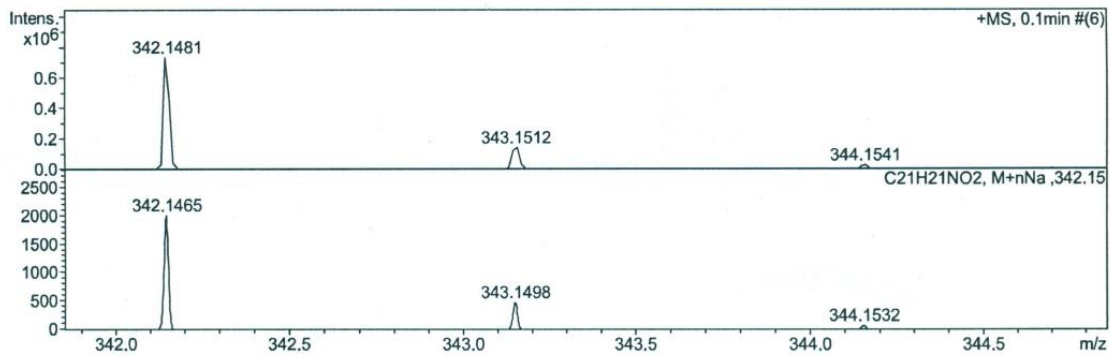

Scanned copy of mass spectrum of (+)-13



Data File C:\CHEM32\1\DATA\NARESH\2017-05-1017-46-58AB-KNB-04-167-R-IC-3-30-1-254-50M.D  
 Sample Name: AB-KNB-04-167-R-IC-3-30-1-254-50M

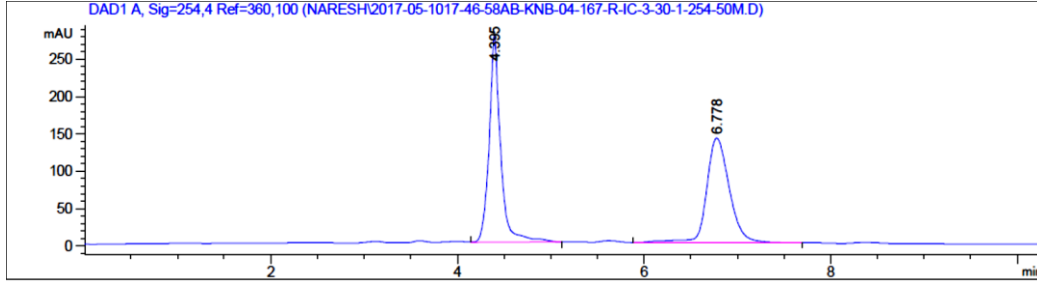

Signal 1: DAD1 A, Sig=254,4 Ref=360,100

| Peak # | RetTime [min] | Type | Width [min] | Area [mAU*s] | Height [mAU] | Area %  |
|--------|---------------|------|-------------|--------------|--------------|---------|
| 1      | 4.395         | VB   | 0.1185      | 2379.25562   | 276.26971    | 50.1021 |
| 2      | 6.778         | BB   | 0.2592      | 2369.55420   | 140.17566    | 49.8979 |

Totals : 4748.80981 416.44537

=====  
 \*\*\* End of Report \*\*\*

### HPLC data of (±)-13

Data File C:\CHEM32\1\DATA\NARESH\2017-05-1017-26-07AB-KNB-04-192-R-IC-3-30-1-254-50M.D  
 Sample Name: AB-KNB-04-192-R-IC-3-30-1-254-50M

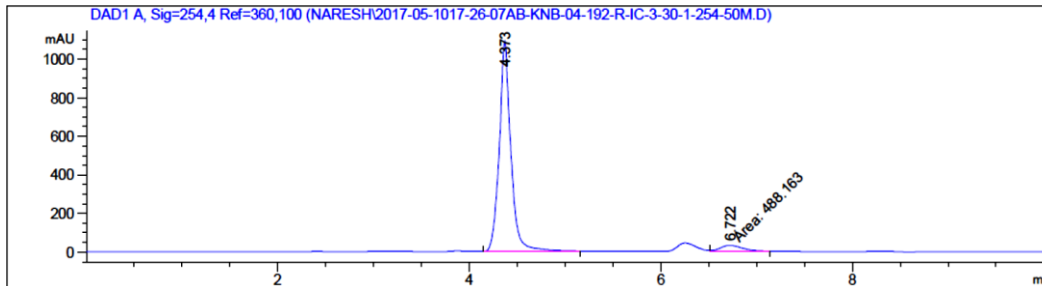

Signal 1: DAD1 A, Sig=254,4 Ref=360,100

| Peak # | RetTime [min] | Type | Width [min] | Area [mAU*s] | Height [mAU] | Area %  |
|--------|---------------|------|-------------|--------------|--------------|---------|
| 1      | 4.373         | BB   | 0.1158      | 9121.92578   | 1087.77991   | 94.9203 |
| 2      | 6.722         | MM   | 0.2652      | 488.16257    | 30.67769     | 5.0797  |

Totals : 9610.08835 1118.45760

=====  
 \*\*\* End of Report \*\*\*

### HPLC data of (+)-13

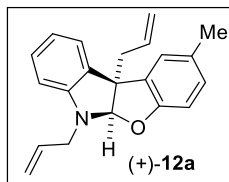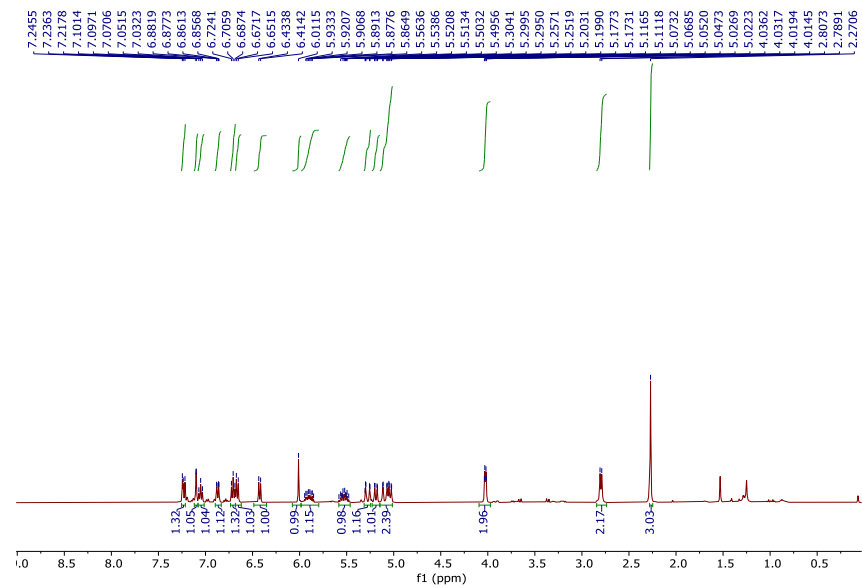

<sup>1</sup>H NMR (400 MHz, CDCl<sub>3</sub>) of compound (+)-12a

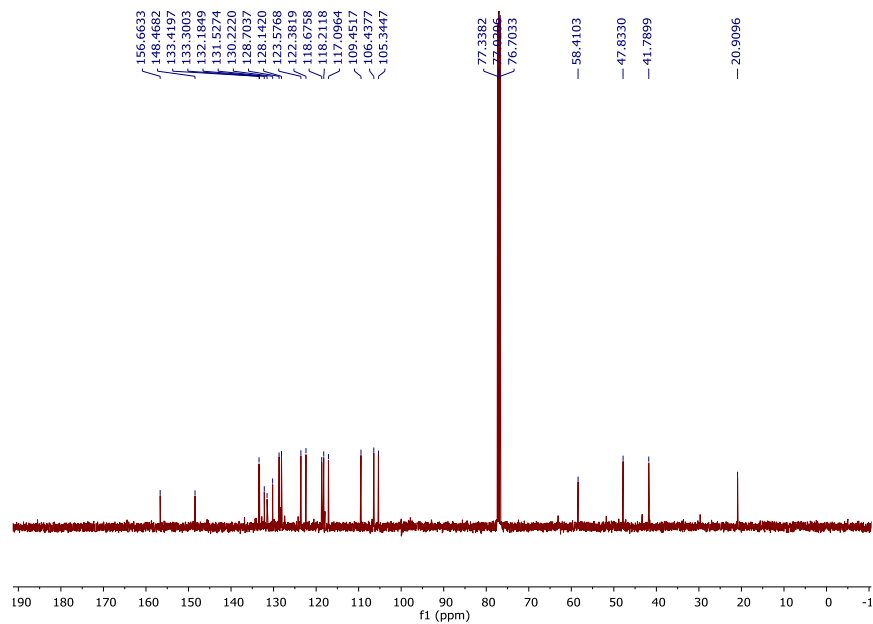

<sup>13</sup>C NMR (100 MHz, CDCl<sub>3</sub>) of compound (+)-12a

## Display Report

## Analysis Info

Analysis Name D:\Data\NEW USER DATA 2017\2018\27 mar\Dr A Bisai-KNB-04-193\_1-A,5\_01\_1405.d  
Method hrlcms-20 sept.m  
Sample Name Dr A Bisai-KNB-04-193  
Comment

Acquisition Date 3/27/2018 10:41:25 AM  
Operator RUCHI  
Instrument micrOTOF-Q II 10330

## Acquisition Parameter

|             |          |                       |           |                  |           |
|-------------|----------|-----------------------|-----------|------------------|-----------|
| Source Type | ESI      | Ion Polarity          | Positive  | Set Nebulizer    | 1.2 Bar   |
| Focus       | Active   | Set Capillary         | 4500 V    | Set Dry Heater   | 200 °C    |
| Scan Begin  | 50 m/z   | Set End Plate Offset  | -500 V    | Set Dry Gas      | 7.0 l/min |
| Scan End    | 3000 m/z | Set Collision Cell RF | 130.0 Vpp | Set Divert Valve | Waste     |

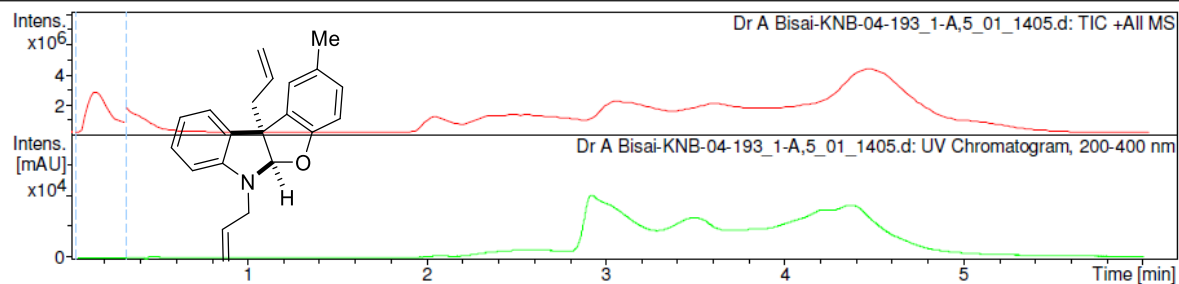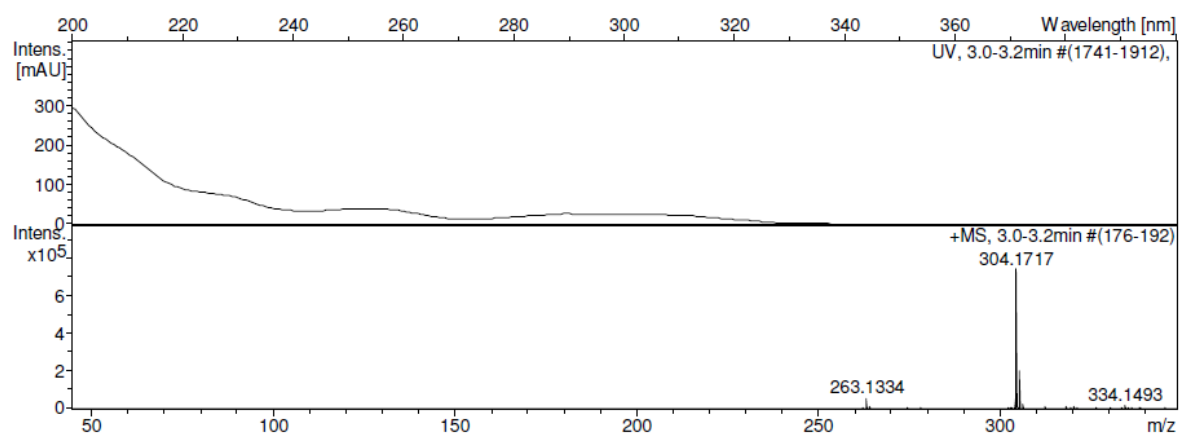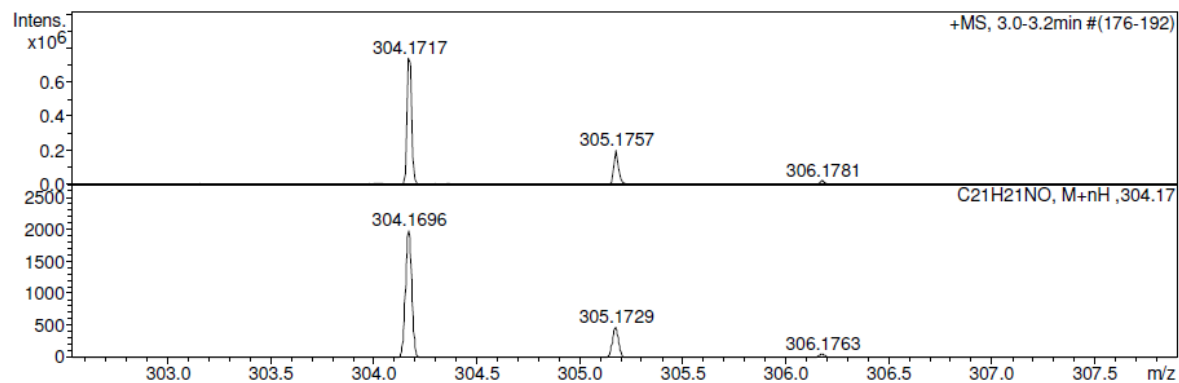

Scanned copy of mass spectrum of (+)-12a

Data File C:\CHEM32\1\DATA\NARESH\2017-05-1112-09-53AB-KNB-04-169-AD-H-05-1-254-60M.D  
 Sample Name: AB-KNB-04-169-AD-H-05-1-254-60M

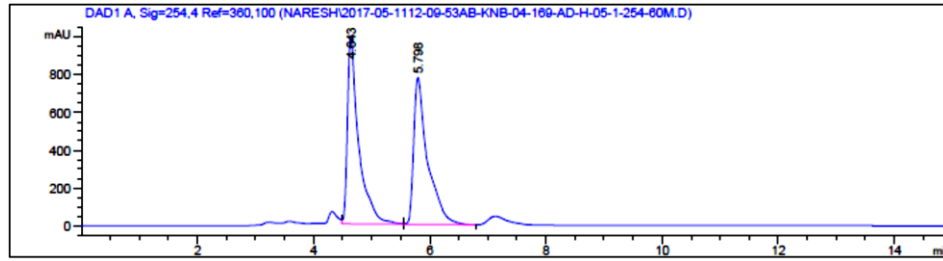

Signal 1: DAD1 A, Sig=254,4 Ref=360,100

| Peak # | RetTime [min] | Type | Width [min] | Area [mAU*s] | Height [mAU] | Area %  |
|--------|---------------|------|-------------|--------------|--------------|---------|
| 1      | 4.643         | VV   | 0.1868      | 1.31793e4    | 993.25177    | 50.7396 |
| 2      | 5.798         | VB   | 0.2321      | 1.27951e4    | 777.19336    | 49.2604 |

Totals : 2.59744e4 1770.44513

\*\*\* End of Report \*\*\*

### HPLC data of (±)-12a

Data File C:\CHEM32\1\DATA\NARESH\2017-06-1313-27-03AB-KNB-04-193-AD-H-05-1-254-60M.D  
 Sample Name: AB-KNB-04-193-AD-H-05-1-254-60M

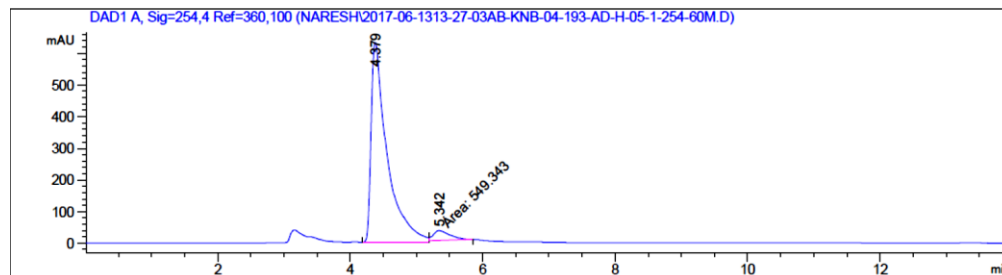

Signal 1: DAD1 A, Sig=254,4 Ref=360,100

| Peak # | RetTime [min] | Type | Width [min] | Area [mAU*s] | Height [mAU] | Area %  |
|--------|---------------|------|-------------|--------------|--------------|---------|
| 1      | 4.379         | BV   | 0.2320      | 1.06171e4    | 631.81897    | 95.0804 |
| 2      | 5.342         | MM   | 0.2926      | 549.34290    | 31.28816     | 4.9196  |

Totals : 1.11664e4 663.10713

\*\*\* End of Report \*\*\*

### HPLC data of (+)-12a
